# Supplementary material for: Exploring the metabolic potential of Aeromonas to utilise the carbohydrate polymer chitin
Source: RSC Chem Biol. 2024 Dec 9;6(2):227–39. doi: 10.1039/d4cb00200h (PMC11653859; doi:10.1039/d4cb00200h)
Supplement: CB-006-D4CB00200H-s001 [file CB-006-D4CB00200H-s001.xlsx]

## Sheet: INDEX
	SPECIES	SAMPLE	NOTES	WORKSHEET
	A. bestiarum	cell pellet proteomics	complete	1.A_bestiarum_pellet
	A. bestiarum	cell pellet proteomics	selected proteins	2.A_bestiarum_pellet_selected
	A. bestiarum	secretome proteomics	complete	3.A_bestiarum_SN
	A. bestiarum	secretome proteomics	selected proteins	4.A_bestiarum_SN_selected
	A. rivuli	cell pellet proteomics	complete	5.A_rivuli_pellet
	A. rivuli	cell pellet proteomics	selected proteins	6.A_rivuli_pellet_selected
	A. rivuli	secretome proteomics	complete	7.A_rivuli_SN
	A. rivuli	secretome proteomics	selected proteins	8.A_rivuli_SN_selected
	A. best + A. rivuli	all	raw numbers for Figure 3 bar graphs	9.Table_Figure3

## Sheet: 1.A_bestiarum_pellet
Protein Group	Protein ID	Accession	Significance (-10log(p))	Coverage (%)	#Peptides	#Unique	PAI	emPAI	Group 1 Area (Glucose)	Group 2 Area (Chitin)	Group 1 Area (top-3 peptides, Glucose)	Group 2 Area (top-3 peptides, Chitin)	Avg. Mass	Description	KO	module	enzymes	module completeness	CAZY	ratio_chitin_to_glucose	LFC	SignalP	adj p-value <0.05 (BH)	adj p-value <0.1 (BH)
132	511	A0A291U0J4|A0A291U0J4	17.12	19	10	10	0.344828	1.21222	77200000	18300000	65100000	16200000	71673	Bifunctional metallophosphatase/5'-nucleotidase OS=Aeromonas sp. CA23 OX=2033032 GN=CK910_11270 PE=3 SV=1	K01081	M00959Â Guanine ribonucleotide degradation, GMP => UrateÂ (13)Â Â (complete 4/4)	tr|A0A291U0J4|A0A291U0J4_9GAMM, tr|A0A291U317|A0A291U317_9GAMM	complete		0.25	-2	LIPO	FALSE	FALSE
284	505	A0A291U2I0|A0A291U2I0	11.92	62	11	11	1	9	494000000	186000000	336000000	140000000	27577	UMP phosphatase OS=Aeromonas sp. CA23 OX=2033032 GN=CK910_14235 PE=4 SV=1	K02566	M00959Â Guanine ribonucleotide degradation, GMP => UrateÂ (13)Â Â (complete 4/4)	tr|A0A291U2I0|A0A291U2I0_9GAMM	complete		0.42	-1.25154	NO_SP	FALSE	FALSE
374	445	A0A291TZQ5|A0A291TZQ5	4.84	62	14	14	1.07692	10.9378	346000000	104000000	224000000	55000000	25593	Purine nucleoside phosphorylase DeoD-type OS=Aeromonas sp. CA23 OX=2033032 GN=deoD PE=3 SV=1	K03784	M00959Â Guanine ribonucleotide degradation, GMP => UrateÂ (13)Â Â (complete 4/4)	tr|A0A291U118|A0A291U118_9GAMM, tr|A0A291TZQ5|A0A291TZQ5_9GAMM	complete		0.25	-2	NO_SP	FALSE	FALSE
1465	836	A0A291TVU6|A0A291TVU6	0.95	17	3	3	0.5	2.16228	106000000	69200000	106000000	69200000	26603	5'-nucleotidase SurE OS=Aeromonas sp. CA23 OX=2033032 GN=surE PE=3 SV=1	K03787	M00959Â Guanine ribonucleotide degradation, GMP => UrateÂ (13)Â Â (complete 4/4)	tr|A0A291TVU6|A0A291TVU6_9GAMM	complete		0.65	-0.621488	NO_SP	FALSE	FALSE
1507	2152	A0A291TYC7|A0A291TYC7	0.8	7	2	2	0.285714	0.930698	5930000	5160000	5930000	4970000	25988	Purine nucleoside phosphorylase OS=Aeromonas sp. CA23 OX=2033032 GN=CK910_06205 PE=3 SV=1	K05810	M00959Â Guanine ribonucleotide degradation, GMP => UrateÂ (13)Â Â (complete 4/4)	tr|A0A291TYC7|A0A291TYC7_9GAMM	complete		0.84	-0.251539	NO_SP	FALSE	FALSE
132	511	A0A291U0J4|A0A291U0J4	17.12	19	10	10	0.344828	1.21222	77200000	18300000	65100000	16200000	71673	Bifunctional metallophosphatase/5'-nucleotidase OS=Aeromonas sp. CA23 OX=2033032 GN=CK910_11270 PE=3 SV=1	K01081	M00958Â Adenine ribonucleotide degradation, AMP => UrateÂ (12)Â Â (complete 3/3)	tr|A0A291U0J4|A0A291U0J4_9GAMM, tr|A0A291U317|A0A291U317_9GAMM	complete		0.25	-2	LIPO	FALSE	FALSE
284	505	A0A291U2I0|A0A291U2I0	11.92	62	11	11	1	9	494000000	186000000	336000000	140000000	27577	UMP phosphatase OS=Aeromonas sp. CA23 OX=2033032 GN=CK910_14235 PE=4 SV=1	K02566	M00958Â Adenine ribonucleotide degradation, AMP => UrateÂ (12)Â Â (complete 3/3)	tr|A0A291U2I0|A0A291U2I0_9GAMM	complete		0.42	-1.25154	NO_SP	FALSE	FALSE
374	445	A0A291TZQ5|A0A291TZQ5	4.84	62	14	14	1.07692	10.9378	346000000	104000000	224000000	55000000	25593	Purine nucleoside phosphorylase DeoD-type OS=Aeromonas sp. CA23 OX=2033032 GN=deoD PE=3 SV=1	K03784	M00958Â Adenine ribonucleotide degradation, AMP => UrateÂ (12)Â Â (complete 3/3)	tr|A0A291U118|A0A291U118_9GAMM, tr|A0A291TZQ5|A0A291TZQ5_9GAMM	complete		0.25	-2	NO_SP	FALSE	FALSE
1465	836	A0A291TVU6|A0A291TVU6	0.95	17	3	3	0.5	2.16228	106000000	69200000	106000000	69200000	26603	5'-nucleotidase SurE OS=Aeromonas sp. CA23 OX=2033032 GN=surE PE=3 SV=1	K03787	M00958Â Adenine ribonucleotide degradation, AMP => UrateÂ (12)Â Â (complete 3/3)	tr|A0A291TVU6|A0A291TVU6_9GAMM	complete		0.65	-0.621488	NO_SP	FALSE	FALSE
1507	2152	A0A291TYC7|A0A291TYC7	0.8	7	2	2	0.285714	0.930698	5930000	5160000	5930000	4970000	25988	Purine nucleoside phosphorylase OS=Aeromonas sp. CA23 OX=2033032 GN=CK910_06205 PE=3 SV=1	K05810	M00958Â Adenine ribonucleotide degradation, AMP => UrateÂ (12)Â Â (complete 3/3)	tr|A0A291TYC7|A0A291TYC7_9GAMM	complete		0.84	-0.251539	NO_SP	FALSE	FALSE
113	231	A0A291U1D1|A0A291U1D1	3.21	52	25	25	1.25	16.7828	645000000	380000000	500000000	310000000	45588	4-aminobutyrate--2-oxoglutarate transaminase OS=Aeromonas sp. CA23 OX=2033032 GN=gabT PE=3 SV=1	K07250	M00957Â Lysine degradation, bacteria, L-lysine => glutarate => succinate/acetyl-CoAÂ (5)Â Â (incomplete 2/5)	tr|A0A291U1D1|A0A291U1D1_9GAMM	complete		0.62	-0.68966	NO_SP	FALSE	FALSE
126	288	A0A291U0R4|A0A291U0R4	12.24	42	18	18	0.857143	6.19686	120000000	333000000	85200000	220000000	51626	Succinate-semialdehyde dehydrogenase (NADP(+)) OS=Aeromonas sp. CA23 OX=2033032 GN=gabD PE=3 SV=1	K00135	M00957Â Lysine degradation, bacteria, L-lysine => glutarate => succinate/acetyl-CoAÂ (5)Â Â (incomplete 2/5)	tr|A0A291U0R4|A0A291U0R4_9GAMM	complete		2.58	1.36737	NO_SP	FALSE	FALSE
152	95	A0A291TXM0|A0A291TXM0	6.64	41	23	23	0.766667	4.84341	195000000	324000000	67400000	164000000	76590	Fatty acid oxidation complex subunit alpha OS=Aeromonas sp. CA23 OX=2033032 GN=fadB PE=3 SV=1	K01825	M00957Â Lysine degradation, bacteria, L-lysine => glutarate => succinate/acetyl-CoAÂ (5)Â Â (incomplete 2/5)	tr|A0A291TXM0|A0A291TXM0_9GAMM	complete		2.44	1.28688	NO_SP	FALSE	FALSE
565	500	A0A291U3P8|A0A291U3P8	2.31	11	7	7	0.225806	0.681924	13700000	6420000	11600000	5120000	76058	Fatty acid oxidation complex subunit alpha FadJ OS=Aeromonas sp. CA23 OX=2033032 GN=fadJ PE=3 SV=1	K01782	M00957Â Lysine degradation, bacteria, L-lysine => glutarate => succinate/acetyl-CoAÂ (5)Â Â (incomplete 2/5)	tr|A0A291U3P8|A0A291U3P8_9GAMM	complete		0.44	-1.18442	NO_SP	FALSE	FALSE
113	231	A0A291U1D1|A0A291U1D1	3.21	52	25	25	1.25	16.7828	645000000	380000000	500000000	310000000	45588	4-aminobutyrate--2-oxoglutarate transaminase OS=Aeromonas sp. CA23 OX=2033032 GN=gabT PE=3 SV=1	K07250	M00956Â Lysine degradation, bacteria, L-lysine => succinateÂ (4)Â Â (incomplete 4/7)	tr|A0A291U1D1|A0A291U1D1_9GAMM	complete		0.62	-0.68966	NO_SP	FALSE	FALSE
126	288	A0A291U0R4|A0A291U0R4	12.24	42	18	18	0.857143	6.19686	120000000	333000000	85200000	220000000	51626	Succinate-semialdehyde dehydrogenase (NADP(+)) OS=Aeromonas sp. CA23 OX=2033032 GN=gabD PE=3 SV=1	K00135	M00956Â Lysine degradation, bacteria, L-lysine => succinateÂ (4)Â Â (incomplete 4/7)	tr|A0A291U0R4|A0A291U0R4_9GAMM	complete		2.58	1.36737	NO_SP	FALSE	FALSE
1417	2355	A0A291TZ88|A0A291TZ88	5.9	5	2	2	0.105263	0.274275	454000	735000	454000	735000	51644	Gamma-aminobutyraldehyde dehydrogenase OS=Aeromonas sp. CA23 OX=2033032 GN=CK910_07675 PE=3 SV=1	K00137	M00956Â Lysine degradation, bacteria, L-lysine => succinateÂ (4)Â Â (incomplete 4/7)	tr|A0A291TZ88|A0A291TZ88_9GAMM	complete		1.62	0.695994	NO_SP	FALSE	FALSE
119	523	A0A291U139|A0A291U139	5.01	60	26	26	1.36842	22.3572	2460000000	128000000	1510000000	57400000	41595	S-adenosylmethionine synthase OS=Aeromonas sp. CA23 OX=2033032 GN=metK PE=3 SV=1	K00789	M00953Â Mugineic acid biosynthesis, methionine => 3-epihydroxymugineic acidÂ (1)Â Â (incomplete 1/5)	tr|A0A291U139|A0A291U139_9GAMM	complete		0.04	-4.64386	NO_SP	FALSE	FALSE
541	616	A0A291U525|A0A291U525	2.24	54	8	8	0.888889	6.74264	95000000	115000000	88200000	107000000	24421	ATP-dependent dethiobiotin synthetase BioD OS=Aeromonas sp. CA23 OX=2033032 GN=bioD PE=3 SV=1	K01935	M00950Â Biotin biosynthesis, BioU pathway, pimeloyl-ACP/CoA => biotinÂ (3)Â Â (1 block missing 3/4)	tr|A0A291U525|A0A291U525_9GAMM	incomplete		1.21	0.275007	NO_SP	FALSE	FALSE
168	111	A0A291U3J4|A0A291U3J4	13.51	29	21	21	0.525	2.34965	108000000	11900000	40800000	4930000	86437	Ribonucleoside-diphosphate reductase OS=Aeromonas sp. CA23 OX=2033032 GN=CK910_16380 PE=3 SV=1	K00525	M00938Â Pyrimidine deoxyribonucleotide biosynthesis, UDP => dTTPÂ (6)Â Â (complete 5/5)	tr|A0A291U3J4|A0A291U3J4_9GAMM, tr|A0A291TVS2|A0A291TVS2_9GAMM	complete		0.12	-3.05889	NO_SP	FALSE	FALSE
379	590	A0A291U4E6|A0A291U4E6	3.41	82	10	10	1.42857	25.827	548000000	408000000	323000000	262000000	15440	Nucleoside diphosphate kinase OS=Aeromonas sp. CA23 OX=2033032 GN=ndk PE=3 SV=1	K00940	M00938Â Pyrimidine deoxyribonucleotide biosynthesis, UDP => dTTPÂ (6)Â Â (complete 5/5)	tr|A0A291U4E6|A0A291U4E6_9GAMM	complete		0.81	-0.304006	NO_SP	FALSE	FALSE
646	435	A0A291TW23|A0A291TW23	33.46	41	8	8	0.615385	3.12463	32700000	13800000	25200000	10500000	29971	Thymidylate synthase OS=Aeromonas sp. CA23 OX=2033032 GN=thyA PE=3 SV=1	K00560	M00938Â Pyrimidine deoxyribonucleotide biosynthesis, UDP => dTTPÂ (6)Â Â (complete 5/5)	tr|A0A291TW23|A0A291TW23_9GAMM	complete		0.42	-1.25154	NO_SP	CORRECT	CORRECT
681	856	A0A291TXM2|A0A291TXM2	4.67	74	5	5	0.833333	5.81292	14700000	4790000	7320000	4280000	16142	Deoxyuridine 5'-triphosphate nucleotidohydrolase OS=Aeromonas sp. CA23 OX=2033032 GN=dut PE=3 SV=1	K01520	M00938Â Pyrimidine deoxyribonucleotide biosynthesis, UDP => dTTPÂ (6)Â Â (complete 5/5)	tr|A0A291TXM2|A0A291TXM2_9GAMM	complete		0.58	-0.785875	NO_SP	FALSE	FALSE
899	555	A0A291U2T2|A0A291U2T2	10.19	19	4	4	0.266667	0.84785	19000000	944000	16800000	944000	43167	Ribonucleoside-diphosphate reductase OS=Aeromonas sp. CA23 OX=2033032 GN=CK910_16375 PE=3 SV=1	K00526	M00938Â Pyrimidine deoxyribonucleotide biosynthesis, UDP => dTTPÂ (6)Â Â (complete 5/5)	tr|A0A291U2T2|A0A291U2T2_9GAMM	complete		0.06	-4.05889	NO_SP	FALSE	FALSE
1061	726	A0A291TVS2|A0A291TVS2	1.74	9	3	3	0.0882353	0.22528	9510000	242000	9510000	242000	79401	Vitamin B12-dependent ribonucleotide reductase OS=Aeromonas sp. CA23 OX=2033032 GN=CK910_00620 PE=3 SV=1	K00525	M00938Â Pyrimidine deoxyribonucleotide biosynthesis, UDP => dTTPÂ (6)Â Â (complete 5/5)	tr|A0A291U3J4|A0A291U3J4_9GAMM, tr|A0A291TVS2|A0A291TVS2_9GAMM	complete		0.03	-5.05889	NO_SP	FALSE	FALSE
486	291	A0A291TWD0|A0A291TWD0	23.6	53	11	11	0.916667	7.25404	58900000	18500000	36600000	11800000	31892	1 4-dihydroxy-2-naphthoyl-CoA synthase OS=Aeromonas sp. CA23 OX=2033032 GN=menB PE=3 SV=1	K01661	M00932Â Phylloquinone biosynthesis, chorismate (+ phytyl-PP) => phylloquinolÂ (7)Â Â (incomplete 4/7)	tr|A0A291TWD0|A0A291TWD0_9GAMM	complete		0.32	-1.64386	NO_SP	FALSE	CORRECT
1404	769	A0A291TWK8|A0A291TWK8	1.29	15	3	3	0.214286	0.637894	10800000	4770000	10800000	4770000	34541	o-succinylbenzoate synthase OS=Aeromonas sp. CA23 OX=2033032 GN=menC PE=3 SV=1	K02549	M00932Â Phylloquinone biosynthesis, chorismate (+ phytyl-PP) => phylloquinolÂ (7)Â Â (incomplete 4/7)	tr|A0A291TWK8|A0A291TWK8_9GAMM	complete		0.44	-1.18442	NO_SP	FALSE	FALSE
515	398	A0A291TVK8|A0A291TVK8	8.78	50	10	10	0.909091	7.11131	89600000	60200000	64800000	45600000	39546	Uroporphyrinogen decarboxylase OS=Aeromonas sp. CA23 OX=2033032 GN=hemE PE=3 SV=1	K01599	M00926Â Heme biosynthesis, bacteria, glutamyl-tRNA => coproporphyrin III => hemeÂ (7)Â Â (2 blocks missing 7/9)	tr|A0A291TVK8|A0A291TVK8_9GAMM	incomplete		0.7	-0.514573	NO_SP	FALSE	FALSE
699	745	A0A291TW89|A0A291TW89	0.24	15	6	6	0.333333	1.15443	229000000	229000000	228000000	228000000	34375	Porphobilinogen deaminase OS=Aeromonas sp. CA23 OX=2033032 GN=hemC PE=3 SV=1	K01749	M00926Â Heme biosynthesis, bacteria, glutamyl-tRNA => coproporphyrin III => hemeÂ (7)Â Â (2 blocks missing 7/9)	tr|A0A291TW89|A0A291TW89_9GAMM	incomplete		1	0	NO_SP	FALSE	FALSE
704	324	A0A291TXY5|A0A291TXY5	2.61	31	11	11	1	9	108000000	76800000	86600000	62000000	37070	Delta-aminolevulinic acid dehydratase OS=Aeromonas sp. CA23 OX=2033032 GN=CK910_04975 PE=3 SV=1	K01698	M00926Â Heme biosynthesis, bacteria, glutamyl-tRNA => coproporphyrin III => hemeÂ (7)Â Â (2 blocks missing 7/9)	tr|A0A291TXY5|A0A291TXY5_9GAMM	incomplete		0.72	-0.473931	NO_SP	FALSE	FALSE
762	493	A0A291U4U0|A0A291U4U0	2.87	44	8	8	0.533333	2.41455	23200000	25100000	18900000	21200000	36509	Ferrochelatase OS=Aeromonas sp. CA23 OX=2033032 GN=hemH PE=3 SV=1	K01772	M00926Â Heme biosynthesis, bacteria, glutamyl-tRNA => coproporphyrin III => hemeÂ (7)Â Â (2 blocks missing 7/9)	tr|A0A291U4U0|A0A291U4U0_9GAMM	incomplete		1.12	0.163499	NO_SP	FALSE	FALSE
1748	1591	A0A291TZP3|A0A291TZP3	0.58	6	2	2	0.142857	0.389495	1690000	1550000	1690000	1550000	45862	Glutamate-1-semialdehyde 2 1-aminomutase OS=Aeromonas sp. CA23 OX=2033032 GN=hemL PE=3 SV=1	K01845	M00926Â Heme biosynthesis, bacteria, glutamyl-tRNA => coproporphyrin III => hemeÂ (7)Â Â (2 blocks missing 7/9)	tr|A0A291TZP3|A0A291TZP3_9GAMM	incomplete		0.92	-0.120294	NO_SP	FALSE	FALSE
680	571	A0A291U026|A0A291U026	5.04	31	6	6	0.75	4.62341	24100000	8180000	22100000	7240000	28658	3-methyl-2-oxobutanoate hydroxymethyltransferase OS=Aeromonas sp. CA23 OX=2033032 GN=panB PE=3 SV=1	K00606	M00914Â Coenzyme A biosynthesis, archaea, 2-oxoisovalerate => 4-phosphopantoate => CoAÂ (3)Â Â (incomplete 3/7)	tr|A0A291U026|A0A291U026_9GAMM	complete		0.33	-1.59946	NO_SP	FALSE	FALSE
426	236	A0A291TZR7|A0A291TZR7	7.95	40	11	11	1	9	168000000	62700000	144000000	44800000	30949	Pantothenate synthetase OS=Aeromonas sp. CA23 OX=2033032 GN=panC PE=3 SV=1	K01918	M00913Â Pantothenate biosynthesis, 2-oxoisovalerate/spermine => pantothenateÂ (3)Â Â (2 blocks missing 3/5)	tr|A0A291TZR7|A0A291TZR7_9GAMM	incomplete		0.31	-1.68966	NO_SP	FALSE	FALSE
680	571	A0A291U026|A0A291U026	5.04	31	6	6	0.75	4.62341	24100000	8180000	22100000	7240000	28658	3-methyl-2-oxobutanoate hydroxymethyltransferase OS=Aeromonas sp. CA23 OX=2033032 GN=panB PE=3 SV=1	K00606	M00913Â Pantothenate biosynthesis, 2-oxoisovalerate/spermine => pantothenateÂ (3)Â Â (2 blocks missing 3/5)	tr|A0A291U026|A0A291U026_9GAMM	incomplete		0.33	-1.59946	NO_SP	FALSE	FALSE
324	228	A0A291TVP6|A0A291TVP6	1.53	30	16	16	0.695652	3.96195	79300000	59000000	44700000	35900000	59424	Glutamine-dependent NAD(+) synthetase OS=Aeromonas sp. CA23 OX=2033032 GN=nadE PE=3 SV=1	K01950	M00912Â NAD biosynthesis, tryptophan => quinolinate => NADÂ (3)Â Â (incomplete 3/8)	tr|A0A291TVP6|A0A291TVP6_9GAMM	complete		0.8	-0.321928	NO_SP	FALSE	FALSE
755	579	A0A291TZ38|A0A291TZ38	8.38	28	9	9	1.125	12.3352	37800000	14200000	19900000	8550000	30724	Quinolinate phosphoribosyltransferase [decarboxylating] OS=Aeromonas sp. CA23 OX=2033032 GN=CK910_07375 PE=3 SV=1	K00767	M00912Â NAD biosynthesis, tryptophan => quinolinate => NADÂ (3)Â Â (incomplete 3/8)	tr|A0A291TZ38|A0A291TZ38_9GAMM	complete		0.43	-1.21759	NO_SP	FALSE	FALSE
1602	2490	A0A291U040|A0A291U040	9.86	17	2	2	0.181818	0.519911	739000	228000	739000	228000	23861	Probable nicotinate-nucleotide adenylyltransferase OS=Aeromonas sp. CA23 OX=2033032 GN=nadD PE=3 SV=1	K00969	M00912Â NAD biosynthesis, tryptophan => quinolinate => NADÂ (3)Â Â (incomplete 3/8)	tr|A0A291U040|A0A291U040_9GAMM	complete		0.31	-1.68966	NO_SP	FALSE	FALSE
516	798	A0A291U4G8|A0A291U4G8	18.6	59	10	10	0.833333	5.81292	52400000	17700000	34200000	11800000	21554	GTP cyclohydrolase-2 OS=Aeromonas sp. CA23 OX=2033032 GN=ribA PE=3 SV=1	K01497	M00911Â Riboflavin biosynthesis, fungi, GTP => riboflavin/FMN/FADÂ (4)Â Â (incomplete 4/8)	tr|A0A291U4G8|A0A291U4G8_9GAMM	complete		0.35	-1.51457	NO_SP	FALSE	FALSE
656	620	A0A291U0K2|A0A291U0K2	4.22	88	11	11	1.57143	36.2759	69800000	35300000	37500000	23200000	16519	6 7-dimethyl-8-ribityllumazine synthase OS=Aeromonas sp. CA23 OX=2033032 GN=ribH PE=3 SV=1	K00794	M00911Â Riboflavin biosynthesis, fungi, GTP => riboflavin/FMN/FADÂ (4)Â Â (incomplete 4/8)	tr|A0A291U0K2|A0A291U0K2_9GAMM	complete		0.62	-0.68966	NO_SP	FALSE	FALSE
1487	1016	A0A291U3K9|A0A291U3K9	24.59	15	3	3	0.428571	1.6827	13500000	786000	13500000	786000	22382	Riboflavin synthase OS=Aeromonas sp. CA23 OX=2033032 GN=CK910_17455 PE=4 SV=1	K00793	M00911Â Riboflavin biosynthesis, fungi, GTP => riboflavin/FMN/FADÂ (4)Â Â (incomplete 4/8)	tr|A0A291U7N7|A0A291U7N7_9GAMM, tr|A0A291U3K9|A0A291U3K9_9GAMM	complete		0.06	-4.05889	NO_SP	FALSE	CORRECT
19	32	A0A291TX57|A0A291TX57	11.01	67	36	36	1.5	30.6228	1760000000	302000000	674000000	123000000	61150	Glucose-6-phosphate isomerase OS=Aeromonas sp. CA23 OX=2033032 GN=pgi PE=3 SV=1	K01810	M00909Â UDP-N-acetyl-D-glucosamine biosynthesis, prokaryotes, glucose => UDP-GlcNAcÂ (5)Â Â (complete 5/5)	tr|A0A291TX57|A0A291TX57_9GAMM	complete		0.18	-2.47393	NO_SP	FALSE	FALSE
93	144	A0A291U0L2|A0A291U0L2	18.78	43	19	19	0.904762	7.03086	448000000	174000000	264000000	91400000	47578	Phosphoglucosamine mutase OS=Aeromonas sp. CA23 OX=2033032 GN=glmM PE=3 SV=1	K03431	M00909Â UDP-N-acetyl-D-glucosamine biosynthesis, prokaryotes, glucose => UDP-GlcNAcÂ (5)Â Â (complete 5/5)	tr|A0A291U0L2|A0A291U0L2_9GAMM	complete	PL22.hmm	0.35	-1.51457	NO_SP	FALSE	FALSE
674	316	A0A291U630|A0A291U630	16.38	36	11	11	0.846154	6.01704	159000000	34300000	133000000	30100000	34170	Glucokinase OS=Aeromonas sp. CA23 OX=2033032 GN=glk PE=3 SV=1	K00845	M00909Â UDP-N-acetyl-D-glucosamine biosynthesis, prokaryotes, glucose => UDP-GlcNAcÂ (5)Â Â (complete 5/5)	tr|A0A291U630|A0A291U630_9GAMM	complete		0.23	-2.12029	NO_SP	FALSE	FALSE
1711	1737	A0A291TXB3|A0A291TXB3	1.8	5	2	2	0.0606061	0.149757	1090000	564000	1090000	564000	66296	Glutamine--fructose-6-phosphate aminotransferase [isomerizing] OS=Aeromonas sp. CA23 OX=2033032 GN=glmS PE=3 SV=1	K00820	M00909Â UDP-N-acetyl-D-glucosamine biosynthesis, prokaryotes, glucose => UDP-GlcNAcÂ (5)Â Â (complete 5/5)	tr|A0A291TXB3|A0A291TXB3_9GAMM	complete		0.52	-0.943416	NO_SP	FALSE	FALSE
1537	778	A0A291TWV8|A0A291TWV8	2.95	5	3	3	0.0909091	0.232847	10400000	221000	10400000	221000	75593	Phosphomethylpyrimidine synthase OS=Aeromonas sp. CA23 OX=2033032 GN=thiC PE=3 SV=1	K03147	M00897Â Thiamine biosynthesis, plants, AIR (+ NAD+) => TMP/thiamine/TPPÂ (2)Â Â (incomplete 2/5)	tr|A0A291TWV8|A0A291TWV8_9GAMM	complete		0.02	-5.64386	NO_SP	FALSE	FALSE
1537	778	A0A291TWV8|A0A291TWV8	2.95	5	3	3	0.0909091	0.232847	10400000	221000	10400000	221000	75593	Phosphomethylpyrimidine synthase OS=Aeromonas sp. CA23 OX=2033032 GN=thiC PE=3 SV=1	K03147	M00896Â Thiamine biosynthesis, archaea, AIR (+ NAD+) => TMP/TPPÂ (2)Â Â (2 blocks missing 2/4)	tr|A0A291TWV8|A0A291TWV8_9GAMM	incomplete		0.02	-5.64386	NO_SP	FALSE	FALSE
484	323	A0A291TWP0|A0A291TWP0	35.43	61	12	12	0.857143	6.19686	112000000	5120000	84800000	2680000	26629	Thiazole synthase OS=Aeromonas sp. CA23 OX=2033032 GN=thiG PE=3 SV=1	K03149	M00895Â Thiamine biosynthesis, prokaryotes, AIR (+ DXP/glycine) => TMP/TPPÂ (6)Â Â (incomplete 5/9)	tr|A0A291TWP0|A0A291TWP0_9GAMM	complete		0.03	-5.05889	NO_SP	CORRECT	CORRECT
1537	778	A0A291TWV8|A0A291TWV8	2.95	5	3	3	0.0909091	0.232847	10400000	221000	10400000	221000	75593	Phosphomethylpyrimidine synthase OS=Aeromonas sp. CA23 OX=2033032 GN=thiC PE=3 SV=1	K03147	M00895Â Thiamine biosynthesis, prokaryotes, AIR (+ DXP/glycine) => TMP/TPPÂ (6)Â Â (incomplete 5/9)	tr|A0A291TWV8|A0A291TWV8_9GAMM	complete		0.02	-5.64386	NO_SP	FALSE	FALSE
19	32	A0A291TX57|A0A291TX57	11.01	67	36	36	1.5	30.6228	1760000000	302000000	674000000	123000000	61150	Glucose-6-phosphate isomerase OS=Aeromonas sp. CA23 OX=2033032 GN=pgi PE=3 SV=1	K01810	M00892Â UDP-N-acetyl-D-glucosamine biosynthesis, eukaryotes, glucose => UDP-GlcNAcÂ (3)Â Â (incomplete 3/6)	tr|A0A291TX57|A0A291TX57_9GAMM	complete		0.18	-2.47393	NO_SP	FALSE	FALSE
674	316	A0A291U630|A0A291U630	16.38	36	11	11	0.846154	6.01704	159000000	34300000	133000000	30100000	34170	Glucokinase OS=Aeromonas sp. CA23 OX=2033032 GN=glk PE=3 SV=1	K00845	M00892Â UDP-N-acetyl-D-glucosamine biosynthesis, eukaryotes, glucose => UDP-GlcNAcÂ (3)Â Â (incomplete 3/6)	tr|A0A291U630|A0A291U630_9GAMM	complete		0.23	-2.12029	NO_SP	FALSE	FALSE
1711	1737	A0A291TXB3|A0A291TXB3	1.8	5	2	2	0.0606061	0.149757	1090000	564000	1090000	564000	66296	Glutamine--fructose-6-phosphate aminotransferase [isomerizing] OS=Aeromonas sp. CA23 OX=2033032 GN=glmS PE=3 SV=1	K00820	M00892Â UDP-N-acetyl-D-glucosamine biosynthesis, eukaryotes, glucose => UDP-GlcNAcÂ (3)Â Â (incomplete 3/6)	tr|A0A291TXB3|A0A291TXB3_9GAMM	complete		0.52	-0.943416	NO_SP	FALSE	FALSE
503	394	A0A291U4V5|A0A291U4V5	2.69	23	7	7	0.368421	1.33572	88500000	74900000	78800000	69900000	43252	Molybdopterin molybdenumtransferase OS=Aeromonas sp. CA23 OX=2033032 GN=CK910_19975 PE=3 SV=1	K03750	M00880Â Molybdenum cofactor biosynthesis, GTP => molybdenum cofactorÂ (6)Â Â (complete 3/3)	tr|A0A291U172|A0A291U172_9GAMM, tr|A0A291U4V5|A0A291U4V5_9GAMM	complete		0.89	-0.168123	NO_SP	FALSE	FALSE
793	949	A0A291U172|A0A291U172	1.88	9	4	4	0.148148	0.406527	7650000	10500000	7550000	7310000	62053	Molybdopterin molybdenumtransferase OS=Aeromonas sp. CA23 OX=2033032 GN=CK910_11640 PE=3 SV=1	K03750	M00880Â Molybdenum cofactor biosynthesis, GTP => molybdenum cofactorÂ (6)Â Â (complete 3/3)	tr|A0A291U172|A0A291U172_9GAMM, tr|A0A291U4V5|A0A291U4V5_9GAMM	complete		0.97	-0.0439433	NO_SP	FALSE	FALSE
1094	1018	A0A291U4J5|A0A291U4J5	17.35	42	5	5	0.625	3.21697	28700000	6260000	25900000	5520000	17563	Cyclic pyranopterin monophosphate synthase OS=Aeromonas sp. CA23 OX=2033032 GN=moaC PE=3 SV=1	K03637	M00880Â Molybdenum cofactor biosynthesis, GTP => molybdenum cofactorÂ (6)Â Â (complete 3/3)	tr|A0A291U4J5|A0A291U4J5_9GAMM	complete		0.21	-2.25154	NO_SP	FALSE	FALSE
1131	645	A0A291U042|A0A291U042	3.91	30	5	5	0.714286	4.17947	157000000	117000000	140000000	101000000	19148	Molybdopterin adenylyltransferase OS=Aeromonas sp. CA23 OX=2033032 GN=CK910_10145 PE=4 SV=1	K03831	M00880Â Molybdenum cofactor biosynthesis, GTP => molybdenum cofactorÂ (6)Â Â (complete 3/3)	tr|A0A291U042|A0A291U042_9GAMM	complete		0.72	-0.473931	NO_SP	FALSE	FALSE
1449	1280	A0A291U4V0|A0A291U4V0	0	26	3	3	0.272727	0.873817	1080000	0	864000	0	17890	MPT synthase subunit 2 OS=Aeromonas sp. CA23 OX=2033032 GN=CK910_20005 PE=3 SV=1	K03635	M00880Â Molybdenum cofactor biosynthesis, GTP => molybdenum cofactorÂ (6)Â Â (complete 3/3)	tr|A0A291U4V0|A0A291U4V0_9GAMM	complete		0	-6.64386	NO_SP	FALSE	FALSE
80	235	A0A291U0X7|A0A291U0X7	7.86	58	22	22	1.04762	10.1588	321000000	700000000	166000000	355000000	48783	N-succinylarginine dihydrolase OS=Aeromonas sp. CA23 OX=2033032 GN=astB PE=3 SV=1	K01484	M00879Â Arginine succinyltransferase pathway, arginine => glutamateÂ (4)Â Â (1 block missing 4/5)	tr|A0A291U0X7|A0A291U0X7_9GAMM	incomplete		2.14	1.09761	NO_SP	FALSE	FALSE
228	684	A0A291U0Y8|A0A291U0Y8	0.48	59	21	21	0.954545	8.00628	279000000	108000000	196000000	91700000	52063	N-succinylglutamate 5-semialdehyde dehydrogenase OS=Aeromonas sp. CA23 OX=2033032 GN=astD PE=3 SV=1	K06447	M00879Â Arginine succinyltransferase pathway, arginine => glutamateÂ (4)Â Â (1 block missing 4/5)	tr|A0A291U0Y8|A0A291U0Y8_9GAMM	incomplete		0.47	-1.08927	NO_SP	FALSE	FALSE
276	446	A0A291U0H4|A0A291U0H4	0.33	44	12	12	0.75	4.62341	82100000	90600000	57500000	59100000	38015	Arginine N-succinyltransferase OS=Aeromonas sp. CA23 OX=2033032 GN=astA PE=4 SV=1	K00673	M00879Â Arginine succinyltransferase pathway, arginine => glutamateÂ (4)Â Â (1 block missing 4/5)	tr|A0A291U0H4|A0A291U0H4_9GAMM	incomplete		1.03	0.0426443	NO_SP	FALSE	FALSE
425	344	A0A291U1N7|A0A291U1N7	2.71	34	9	9	0.45	1.81838	75800000	48400000	40800000	33600000	38792	Succinylglutamate desuccinylase OS=Aeromonas sp. CA23 OX=2033032 GN=astE PE=3 SV=1	K05526	M00879Â Arginine succinyltransferase pathway, arginine => glutamateÂ (4)Â Â (1 block missing 4/5)	tr|A0A291U1N7|A0A291U1N7_9GAMM	incomplete		0.82	-0.286304	NO_SP	FALSE	FALSE
327	216	A0A291U3A8|A0A291U3A8	7.63	50	10	10	1.11111	11.9155	184000000	72100000	136000000	52700000	32727	Malonyl CoA-acyl carrier protein transacylase OS=Aeromonas sp. CA23 OX=2033032 GN=fabD PE=3 SV=1	K00645	M00874Â Fatty acid biosynthesis in mitochondria, fungiÂ (3)Â Â (incomplete 2/6)	tr|A0A291U3A8|A0A291U3A8_9GAMM	complete		0.39	-1.35845	NO_SP	FALSE	FALSE
445	544	A0A291U3M5|A0A291U3M5	0.13	39	8	8	1	9	191000000	172000000	158000000	137000000	25718	3-oxoacyl-[acyl-carrier-protein] reductase OS=Aeromonas sp. CA23 OX=2033032 GN=fabG PE=3 SV=1	K00059	M00874Â Fatty acid biosynthesis in mitochondria, fungiÂ (3)Â Â (incomplete 2/6)	tr|A0A291U3M5|A0A291U3M5_9GAMM, tr|A0A291TYJ5|A0A291TYJ5_9GAMM, tr|A0A291TZY5|A0A291TZY5_9GAMM, tr|A0A291U481|A0A291U481_9GAMM	complete		0.87	-0.200913	NO_SP	FALSE	FALSE
549	728	A0A291U481|A0A291U481	10.48	49	9	9	0.75	4.62341	34600000	108000000	27200000	76600000	26483	3-oxoacyl-ACP reductase OS=Aeromonas sp. CA23 OX=2033032 GN=fabG PE=4 SV=1	K00059	M00874Â Fatty acid biosynthesis in mitochondria, fungiÂ (3)Â Â (incomplete 2/6)	tr|A0A291U3M5|A0A291U3M5_9GAMM, tr|A0A291TYJ5|A0A291TYJ5_9GAMM, tr|A0A291TZY5|A0A291TZY5_9GAMM, tr|A0A291U481|A0A291U481_9GAMM	complete		2.82	1.4957	NO_SP	FALSE	FALSE
1331	1107	A0A291TYJ5|A0A291TYJ5	9.12	18	4	4	0.363636	1.31013	5550000	7180000	4860000	6370000	25966	3-oxoacyl-ACP reductase OS=Aeromonas sp. CA23 OX=2033032 GN=CK910_05700 PE=4 SV=1	K00059	M00874Â Fatty acid biosynthesis in mitochondria, fungiÂ (3)Â Â (incomplete 2/6)	tr|A0A291U3M5|A0A291U3M5_9GAMM, tr|A0A291TYJ5|A0A291TYJ5_9GAMM, tr|A0A291TZY5|A0A291TZY5_9GAMM, tr|A0A291U481|A0A291U481_9GAMM	complete		1.31	0.389567	NO_SP	FALSE	FALSE
1377	1356	A0A291U392|A0A291U392	1.66	11	2	2	0.142857	0.389495	8490000	4730000	7550000	4730000	43115	3-oxoacyl-[acyl-carrier-protein] synthase 2 OS=Aeromonas sp. CA23 OX=2033032 GN=fabF PE=3 SV=1	K09458	M00874Â Fatty acid biosynthesis in mitochondria, fungiÂ (3)Â Â (incomplete 2/6)	tr|A0A291U0E4|A0A291U0E4_9GAMM, tr|A0A291U392|A0A291U392_9GAMM	complete		0.63	-0.666576	NO_SP	FALSE	FALSE
1384	984	A0A291TZY5|A0A291TZY5	21.72	15	3	3	0.3	0.995262	8680000	3540000	8680000	3540000	25339	3-oxoacyl-ACP reductase FabG OS=Aeromonas sp. CA23 OX=2033032 GN=CK910_10130 PE=4 SV=1	K00059	M00874Â Fatty acid biosynthesis in mitochondria, fungiÂ (3)Â Â (incomplete 2/6)	tr|A0A291U3M5|A0A291U3M5_9GAMM, tr|A0A291TYJ5|A0A291TYJ5_9GAMM, tr|A0A291TZY5|A0A291TZY5_9GAMM, tr|A0A291U481|A0A291U481_9GAMM	complete		0.41	-1.2863	NO_SP	FALSE	FALSE
327	216	A0A291U3A8|A0A291U3A8	7.63	50	10	10	1.11111	11.9155	184000000	72100000	136000000	52700000	32727	Malonyl CoA-acyl carrier protein transacylase OS=Aeromonas sp. CA23 OX=2033032 GN=fabD PE=3 SV=1	K00645	M00873Â Fatty acid biosynthesis in mitochondria, animalsÂ (2)Â Â (incomplete 1/6)	tr|A0A291U3A8|A0A291U3A8_9GAMM	complete		0.39	-1.35845	NO_SP	FALSE	FALSE
1377	1356	A0A291U392|A0A291U392	1.66	11	2	2	0.142857	0.389495	8490000	4730000	7550000	4730000	43115	3-oxoacyl-[acyl-carrier-protein] synthase 2 OS=Aeromonas sp. CA23 OX=2033032 GN=fabF PE=3 SV=1	K09458	M00873Â Fatty acid biosynthesis in mitochondria, animalsÂ (2)Â Â (incomplete 1/6)	tr|A0A291U0E4|A0A291U0E4_9GAMM, tr|A0A291U392|A0A291U392_9GAMM	complete		0.63	-0.666576	NO_SP	FALSE	FALSE
515	398	A0A291TVK8|A0A291TVK8	8.78	50	10	10	0.909091	7.11131	89600000	60200000	64800000	45600000	39546	Uroporphyrinogen decarboxylase OS=Aeromonas sp. CA23 OX=2033032 GN=hemE PE=3 SV=1	K01599	M00868Â Heme biosynthesis, animals and fungi, glycine => hemeÂ (6)Â Â (2 blocks missing 6/8)	tr|A0A291TVK8|A0A291TVK8_9GAMM	incomplete		0.7	-0.514573	NO_SP	FALSE	FALSE
699	745	A0A291TW89|A0A291TW89	0.24	15	6	6	0.333333	1.15443	229000000	229000000	228000000	228000000	34375	Porphobilinogen deaminase OS=Aeromonas sp. CA23 OX=2033032 GN=hemC PE=3 SV=1	K01749	M00868Â Heme biosynthesis, animals and fungi, glycine => hemeÂ (6)Â Â (2 blocks missing 6/8)	tr|A0A291TW89|A0A291TW89_9GAMM	incomplete		1	0	NO_SP	FALSE	FALSE
704	324	A0A291TXY5|A0A291TXY5	2.61	31	11	11	1	9	108000000	76800000	86600000	62000000	37070	Delta-aminolevulinic acid dehydratase OS=Aeromonas sp. CA23 OX=2033032 GN=CK910_04975 PE=3 SV=1	K01698	M00868Â Heme biosynthesis, animals and fungi, glycine => hemeÂ (6)Â Â (2 blocks missing 6/8)	tr|A0A291TXY5|A0A291TXY5_9GAMM	incomplete		0.72	-0.473931	NO_SP	FALSE	FALSE
762	493	A0A291U4U0|A0A291U4U0	2.87	44	8	8	0.533333	2.41455	23200000	25100000	18900000	21200000	36509	Ferrochelatase OS=Aeromonas sp. CA23 OX=2033032 GN=hemH PE=3 SV=1	K01772	M00868Â Heme biosynthesis, animals and fungi, glycine => hemeÂ (6)Â Â (2 blocks missing 6/8)	tr|A0A291U4U0|A0A291U4U0_9GAMM	incomplete		1.12	0.163499	NO_SP	FALSE	FALSE
929	788	A0A291U5Z6|A0A291U5Z6	0.87	26	5	5	0.5	2.16228	17600000	13500000	12100000	9550000	28336	Acyl-[acyl-carrier-protein]--UDP-N-acetylglucosamine O-acyltransferase OS=Aeromonas sp. CA23 OX=2033032 GN=lpxA PE=3 SV=1	K00677	M00866Â KDO2-lipid A biosynthesis, Raetz pathway, non-LpxL-LpxM typeÂ (8)Â Â (1 block missing 8/9)	tr|A0A291U5Z6|A0A291U5Z6_9GAMM	incomplete		0.79	-0.340075	NO_SP	FALSE	FALSE
1391	928	A0A291U613|A0A291U613	2.55	9	3	3	0.157895	0.43845	22400000	15000000	22400000	15000000	42324	Lipid-A-disaccharide synthase OS=Aeromonas sp. CA23 OX=2033032 GN=lpxB PE=3 SV=1	K00748	M00866Â KDO2-lipid A biosynthesis, Raetz pathway, non-LpxL-LpxM typeÂ (8)Â Â (1 block missing 8/9)	tr|A0A291U613|A0A291U613_9GAMM	incomplete	GT19.hmm	0.67	-0.577767	NO_SP	FALSE	FALSE
1410	1457	A0A291TZ28|A0A291TZ28	0	6	2	2	0.133333	0.359356	15900000	1180000	14500000	986000	34430	UDP-3-O-acyl-N-acetylglucosamine deacetylase OS=Aeromonas sp. CA23 OX=2033032 GN=lpxC PE=3 SV=1	K02535	M00866Â KDO2-lipid A biosynthesis, Raetz pathway, non-LpxL-LpxM typeÂ (8)Â Â (1 block missing 8/9)	tr|A0A291TZ28|A0A291TZ28_9GAMM	incomplete	CE11.hmm	0.07	-3.8365	NO_SP	FALSE	FALSE
1772	2235	A0A291TXI2|A0A291TXI2	0	6	2	2	0.117647	0.311134	3210000	1280000	3210000	1280000	46234	3-deoxy-D-manno-octulosonic acid transferase OS=Aeromonas sp. CA23 OX=2033032 GN=CK910_04185 PE=3 SV=1	K02527	M00866Â KDO2-lipid A biosynthesis, Raetz pathway, non-LpxL-LpxM typeÂ (8)Â Â (1 block missing 8/9)	tr|A0A291TXI2|A0A291TXI2_9GAMM	incomplete	GT30.hmm	0.4	-1.32193	NO_SP	FALSE	FALSE
1772	2235	A0A291TXI2|A0A291TXI2	0	6	2	2	0.117647	0.311134	3210000	1280000	3210000	1280000	46234	3-deoxy-D-manno-octulosonic acid transferase OS=Aeromonas sp. CA23 OX=2033032 GN=CK910_04185 PE=3 SV=1	K02527	M00866Â KDO2-lipid A biosynthesis, Raetz pathway, non-LpxL-LpxM typeÂ (8)Â Â (1 block missing 8/9)	tr|A0A291TXI2|A0A291TXI2_9GAMM	incomplete	GT30.hmm	0.4	-1.32193	NO_SP	FALSE	FALSE
1772	2235	A0A291TXI2|A0A291TXI2	0	6	2	2	0.117647	0.311134	3210000	1280000	3210000	1280000	46234	3-deoxy-D-manno-octulosonic acid transferase OS=Aeromonas sp. CA23 OX=2033032 GN=CK910_04185 PE=3 SV=1	K02527	M00866Â KDO2-lipid A biosynthesis, Raetz pathway, non-LpxL-LpxM typeÂ (8)Â Â (1 block missing 8/9)	tr|A0A291TXI2|A0A291TXI2_9GAMM	incomplete	GT28.hmm	0.4	-1.32193	NO_SP	FALSE	FALSE
208	154	A0A291U5M4|A0A291U5M4	0.9	36	13	13	0.448276	1.80722	105000000	121000000	78000000	92200000	59185	Phosphoglucomutase (alpha-D-glucose-1 6-bisphosphate-dependent) OS=Aeromonas sp. CA23 OX=2033032 GN=CK910_20285 PE=3 SV=1	K01835	M00855Â Glycogen degradation, glycogen => glucose-6PÂ (3)Â Â (1 block missing 2/3)	tr|A0A291U5M4|A0A291U5M4_9GAMM	incomplete		1.18	0.238787	NO_SP	FALSE	FALSE
301	261	A0A291U3D5|A0A291U3D5	8.4	25	18	18	0.428571	1.6827	48900000	24800000	27500000	14400000	93462	Alpha-1 4 glucan phosphorylase OS=Aeromonas sp. CA23 OX=2033032 GN=CK910_15915 PE=3 SV=1	K00688	M00855Â Glycogen degradation, glycogen => glucose-6PÂ (3)Â Â (1 block missing 2/3)	tr|A0A291U3D5|A0A291U3D5_9GAMM	incomplete	GT35.hmm	0.52	-0.943416	NO_SP	FALSE	FALSE
410	247	A0A291TZJ7|A0A291TZJ7	1.52	18	12	12	0.444444	1.78256	170000000	45700000	90900000	33700000	83008	4-alpha-glucanotransferase OS=Aeromonas sp. CA23 OX=2033032 GN=CK910_08985 PE=3 SV=1	K00705	M00855Â Glycogen degradation, glycogen => glucose-6PÂ (3)Â Â (1 block missing 2/3)	tr|A0A291TZJ7|A0A291TZJ7_9GAMM	incomplete	GH77.hmm	0.37	-1.4344	NO_SP	FALSE	FALSE
143	80	A0A291TZV4|A0A291TZV4	4.61	43	24	24	0.923077	7.37678	150000000	207000000	89800000	111000000	83122	1 4-alpha-glucan branching enzyme GlgB OS=Aeromonas sp. CA23 OX=2033032 GN=glgB PE=3 SV=1	K00700	M00854Â Glycogen biosynthesis, glucose-1P => glycogen/starchÂ (4)Â Â (complete 2/2)	tr|A0A291TZV4|A0A291TZV4_9GAMM	complete	GH13.hmm	1.24	0.31034	NO_SP	FALSE	FALSE
143	80	A0A291TZV4|A0A291TZV4	4.61	43	24	24	0.923077	7.37678	150000000	207000000	89800000	111000000	83122	1 4-alpha-glucan branching enzyme GlgB OS=Aeromonas sp. CA23 OX=2033032 GN=glgB PE=3 SV=1	K00700	M00854Â Glycogen biosynthesis, glucose-1P => glycogen/starchÂ (4)Â Â (complete 2/2)	tr|A0A291TZV4|A0A291TZV4_9GAMM	complete	CBM48.hmm	1.24	0.31034	NO_SP	FALSE	FALSE
143	80	A0A291TZV4|A0A291TZV4	4.61	43	24	24	0.923077	7.37678	150000000	207000000	89800000	111000000	83122	1 4-alpha-glucan branching enzyme GlgB OS=Aeromonas sp. CA23 OX=2033032 GN=glgB PE=3 SV=1	K00700	M00854Â Glycogen biosynthesis, glucose-1P => glycogen/starchÂ (4)Â Â (complete 2/2)	tr|A0A291TZV4|A0A291TZV4_9GAMM	complete	CBM48.hmm	1.24	0.31034	NO_SP	FALSE	FALSE
143	80	A0A291TZV4|A0A291TZV4	4.61	43	24	24	0.923077	7.37678	150000000	207000000	89800000	111000000	83122	1 4-alpha-glucan branching enzyme GlgB OS=Aeromonas sp. CA23 OX=2033032 GN=glgB PE=3 SV=1	K00700	M00854Â Glycogen biosynthesis, glucose-1P => glycogen/starchÂ (4)Â Â (complete 2/2)	tr|A0A291TZV4|A0A291TZV4_9GAMM	complete	GH70.hmm	1.24	0.31034	NO_SP	FALSE	FALSE
143	80	A0A291TZV4|A0A291TZV4	4.61	43	24	24	0.923077	7.37678	150000000	207000000	89800000	111000000	83122	1 4-alpha-glucan branching enzyme GlgB OS=Aeromonas sp. CA23 OX=2033032 GN=glgB PE=3 SV=1	K00700	M00854Â Glycogen biosynthesis, glucose-1P => glycogen/starchÂ (4)Â Â (complete 2/2)	tr|A0A291TZV4|A0A291TZV4_9GAMM	complete	GH5.hmm	1.24	0.31034	NO_SP	FALSE	FALSE
143	80	A0A291TZV4|A0A291TZV4	4.61	43	24	24	0.923077	7.37678	150000000	207000000	89800000	111000000	83122	1 4-alpha-glucan branching enzyme GlgB OS=Aeromonas sp. CA23 OX=2033032 GN=glgB PE=3 SV=1	K00700	M00854Â Glycogen biosynthesis, glucose-1P => glycogen/starchÂ (4)Â Â (complete 2/2)	tr|A0A291TZV4|A0A291TZV4_9GAMM	complete	GH5.hmm	1.24	0.31034	NO_SP	FALSE	FALSE
161	85	A0A291U1Q3|A0A291U1Q3	4.53	49	22	22	1.22222	15.681	487000000	194000000	318000000	136000000	47084	Glucose-1-phosphate adenylyltransferase OS=Aeromonas sp. CA23 OX=2033032 GN=glgC PE=3 SV=1	K00975	M00854Â Glycogen biosynthesis, glucose-1P => glycogen/starchÂ (4)Â Â (complete 2/2)	tr|A0A291U1Q3|A0A291U1Q3_9GAMM, tr|A0A291TYZ9|A0A291TYZ9_9GAMM	complete		0.43	-1.21759	NO_SP	FALSE	FALSE
164	45	A0A291TYZ9|A0A291TYZ9	8.12	77	27	27	1.125	12.3352	657000000	253000000	376000000	158000000	45293	Glucose-1-phosphate adenylyltransferase OS=Aeromonas sp. CA23 OX=2033032 GN=glgC PE=3 SV=1	K00975	M00854Â Glycogen biosynthesis, glucose-1P => glycogen/starchÂ (4)Â Â (complete 2/2)	tr|A0A291U1Q3|A0A291U1Q3_9GAMM, tr|A0A291TYZ9|A0A291TYZ9_9GAMM	complete		0.42	-1.25154	NO_SP	FALSE	FALSE
304	169	A0A291TZA0|A0A291TZA0	0.23	36	15	15	0.9375	7.65964	118000000	54000000	74400000	44000000	54913	Glycogen synthase OS=Aeromonas sp. CA23 OX=2033032 GN=glgA PE=3 SV=1	K00703	M00854Â Glycogen biosynthesis, glucose-1P => glycogen/starchÂ (4)Â Â (complete 2/2)	tr|A0A291TZA0|A0A291TZA0_9GAMM	complete	GT5.hmm	0.59	-0.761213	NO_SP	FALSE	FALSE
304	169	A0A291TZA0|A0A291TZA0	0.23	36	15	15	0.9375	7.65964	118000000	54000000	74400000	44000000	54913	Glycogen synthase OS=Aeromonas sp. CA23 OX=2033032 GN=glgA PE=3 SV=1	K00703	M00854Â Glycogen biosynthesis, glucose-1P => glycogen/starchÂ (4)Â Â (complete 2/2)	tr|A0A291TZA0|A0A291TZA0_9GAMM	complete	GT4.hmm	0.59	-0.761213	NO_SP	FALSE	FALSE
455	383	A0A291U764|A0A291U764	2.04	32	10	10	0.833333	5.81292	86600000	45600000	64200000	35200000	33620	UTP--glucose-1-phosphate uridylyltransferase OS=Aeromonas sp. CA23 OX=2033032 GN=galU PE=3 SV=1	K00963	M00854Â Glycogen biosynthesis, glucose-1P => glycogen/starchÂ (4)Â Â (complete 2/2)	tr|A0A291U764|A0A291U764_9GAMM	complete		0.55	-0.862496	NO_SP	FALSE	FALSE
954	851	A0A291U017|A0A291U017	17.19	53	9	9	0.692308	3.92388	25300000	6440000	17000000	3560000	21983	Flavin prenyltransferase UbiX OS=Aeromonas sp. CA23 OX=2033032 GN=ubiX PE=3 SV=1	K03186	M00849Â C5 isoprenoid biosynthesis, mevalonate pathway, archaeaÂ (2)Â Â (incomplete 1/6)	tr|A0A291U017|A0A291U017_9GAMM	complete		0.21	-2.25154	NO_SP	FALSE	FALSE
121	213	A0A291TWU4|A0A291TWU4	7.65	66	23	23	1.21053	15.2378	361000000	207000000	213000000	124000000	39364	Heme biosynthesis operon protein HemX OS=Aeromonas sp. CA23 OX=2033032 GN=CK910_02700 PE=4 SV=1	K02496	M00846Â Siroheme biosynthesis, glutamyl-tRNA => sirohemeÂ (7)Â Â (complete 6/6)	tr|A0A291TWU4|A0A291TWU4_9GAMM	complete		0.58	-0.785875	NO_SP	FALSE	FALSE
699	745	A0A291TW89|A0A291TW89	0.24	15	6	6	0.333333	1.15443	229000000	229000000	228000000	228000000	34375	Porphobilinogen deaminase OS=Aeromonas sp. CA23 OX=2033032 GN=hemC PE=3 SV=1	K01749	M00846Â Siroheme biosynthesis, glutamyl-tRNA => sirohemeÂ (7)Â Â (complete 6/6)	tr|A0A291TW89|A0A291TW89_9GAMM	complete		1	0	NO_SP	FALSE	FALSE
704	324	A0A291TXY5|A0A291TXY5	2.61	31	11	11	1	9	108000000	76800000	86600000	62000000	37070	Delta-aminolevulinic acid dehydratase OS=Aeromonas sp. CA23 OX=2033032 GN=CK910_04975 PE=3 SV=1	K01698	M00846Â Siroheme biosynthesis, glutamyl-tRNA => sirohemeÂ (7)Â Â (complete 6/6)	tr|A0A291TXY5|A0A291TXY5_9GAMM	complete		0.72	-0.473931	NO_SP	FALSE	FALSE
1748	1591	A0A291TZP3|A0A291TZP3	0.58	6	2	2	0.142857	0.389495	1690000	1550000	1690000	1550000	45862	Glutamate-1-semialdehyde 2 1-aminomutase OS=Aeromonas sp. CA23 OX=2033032 GN=hemL PE=3 SV=1	K01845	M00846Â Siroheme biosynthesis, glutamyl-tRNA => sirohemeÂ (7)Â Â (complete 6/6)	tr|A0A291TZP3|A0A291TZP3_9GAMM	complete		0.92	-0.120294	NO_SP	FALSE	FALSE
101	30	A0A291U0J1|A0A291U0J1	0.45	78	31	31	1.9375	85.5964	529000000	305000000	241000000	127000000	43338	Acetylornithine aminotransferase OS=Aeromonas sp. CA23 OX=2033032 GN=argD PE=3 SV=1	K00821	M00845Â Arginine biosynthesis, glutamate => acetylcitrulline => arginineÂ (5)Â Â (2 blocks missing 5/7)	tr|A0A291U0J1|A0A291U0J1_9GAMM	incomplete		0.53	-0.915936	NO_SP	FALSE	FALSE
142	91	A0A291TWS4|A0A291TWS4	15.92	66	23	23	1.35294	21.5393	860000000	119000000	501000000	63500000	45223	Argininosuccinate synthase OS=Aeromonas sp. CA23 OX=2033032 GN=argG PE=3 SV=1	K01940	M00845Â Arginine biosynthesis, glutamate => acetylcitrulline => arginineÂ (5)Â Â (2 blocks missing 5/7)	tr|A0A291TWS4|A0A291TWS4_9GAMM	incomplete		0.13	-2.94342	NO_SP	FALSE	FALSE
155	222	A0A291TWH4|A0A291TWH4	11.21	44	16	16	0.761905	4.77969	772000000	59900000	517000000	48700000	50020	Argininosuccinate lyase OS=Aeromonas sp. CA23 OX=2033032 GN=argH PE=3 SV=1	K01755	M00845Â Arginine biosynthesis, glutamate => acetylcitrulline => arginineÂ (5)Â Â (2 blocks missing 5/7)	tr|A0A291TWH4|A0A291TWH4_9GAMM	incomplete		0.09	-3.47393	NO_SP	FALSE	FALSE
479	393	A0A291TW07|A0A291TW07	10.89	53	12	12	0.923077	7.37678	199000000	39000000	96400000	32500000	35973	N-acetyl-gamma-glutamyl-phosphate reductase OS=Aeromonas sp. CA23 OX=2033032 GN=argC PE=3 SV=1	K00145	M00845Â Arginine biosynthesis, glutamate => acetylcitrulline => arginineÂ (5)Â Â (2 blocks missing 5/7)	tr|A0A291TW07|A0A291TW07_9GAMM	incomplete		0.34	-1.55639	NO_SP	FALSE	FALSE
1086	1133	A0A291TWH1|A0A291TWH1	2.33	10	3	3	0.25	0.778279	6290000	7570000	6290000	7570000	41473	Acetylornithine deacetylase OS=Aeromonas sp. CA23 OX=2033032 GN=CK910_02060 PE=3 SV=1	K01438	M00845Â Arginine biosynthesis, glutamate => acetylcitrulline => arginineÂ (5)Â Â (2 blocks missing 5/7)	tr|A0A291TWH1|A0A291TWH1_9GAMM	incomplete		1.2	0.263034	NO_SP	FALSE	FALSE
142	91	A0A291TWS4|A0A291TWS4	15.92	66	23	23	1.35294	21.5393	860000000	119000000	501000000	63500000	45223	Argininosuccinate synthase OS=Aeromonas sp. CA23 OX=2033032 GN=argG PE=3 SV=1	K01940	M00844Â Arginine biosynthesis, ornithine => arginineÂ (3)Â Â (complete 3/3)	tr|A0A291TWS4|A0A291TWS4_9GAMM	complete		0.13	-2.94342	NO_SP	FALSE	FALSE
155	222	A0A291TWH4|A0A291TWH4	11.21	44	16	16	0.761905	4.77969	772000000	59900000	517000000	48700000	50020	Argininosuccinate lyase OS=Aeromonas sp. CA23 OX=2033032 GN=argH PE=3 SV=1	K01755	M00844Â Arginine biosynthesis, ornithine => arginineÂ (3)Â Â (complete 3/3)	tr|A0A291TWH4|A0A291TWH4_9GAMM	complete		0.09	-3.47393	NO_SP	FALSE	FALSE
167	259	A0A291TWB0|A0A291TWB0	8.29	72	19	19	1.72727	52.367	1700000000	193000000	1080000000	122000000	33250	Ornithine carbamoyltransferase OS=Aeromonas sp. CA23 OX=2033032 GN=CK910_02045 PE=3 SV=1	K00611	M00844Â Arginine biosynthesis, ornithine => arginineÂ (3)Â Â (complete 3/3)	tr|A0A291TY23|A0A291TY23_9GAMM, tr|A0A291TWB0|A0A291TWB0_9GAMM	complete		0.11	-3.18442	NO_SP	FALSE	FALSE
537	299	A0A291TY23|A0A291TY23	12.65	37	13	12	0.866667	6.35642	78600000	36900000	30100000	17100000	37596	Ornithine carbamoyltransferase OS=Aeromonas sp. CA23 OX=2033032 GN=argF PE=3 SV=1	K00611	M00844Â Arginine biosynthesis, ornithine => arginineÂ (3)Â Â (complete 3/3)	tr|A0A291TY23|A0A291TY23_9GAMM, tr|A0A291TWB0|A0A291TWB0_9GAMM	complete		0.57	-0.810966	NO_SP	FALSE	FALSE
578	670	A0A291U517|A0A291U517	10.87	56	10	10	0.833333	5.81292	176000000	29000000	134000000	24400000	24093	GTP cyclohydrolase 1 OS=Aeromonas sp. CA23 OX=2033032 GN=folE PE=3 SV=1	K01495	M00843Â L-threo-Tetrahydrobiopterin biosynthesis, GTP => L-threo-BH4Â (1)Â Â (2 blocks missing 1/3)	tr|A0A291U517|A0A291U517_9GAMM	incomplete		0.18	-2.47393	NO_SP	FALSE	FALSE
578	670	A0A291U517|A0A291U517	10.87	56	10	10	0.833333	5.81292	176000000	29000000	134000000	24400000	24093	GTP cyclohydrolase 1 OS=Aeromonas sp. CA23 OX=2033032 GN=folE PE=3 SV=1	K01495	M00842Â Tetrahydrobiopterin biosynthesis, GTP => BH4Â (1)Â Â (2 blocks missing 1/3)	tr|A0A291U517|A0A291U517_9GAMM	incomplete		0.18	-2.47393	NO_SP	FALSE	FALSE
578	670	A0A291U517|A0A291U517	10.87	56	10	10	0.833333	5.81292	176000000	29000000	134000000	24400000	24093	GTP cyclohydrolase 1 OS=Aeromonas sp. CA23 OX=2033032 GN=folE PE=3 SV=1	K01495	M00841Â Tetrahydrofolate biosynthesis, mediated by PTPS, GTP => THFÂ (2)Â Â (incomplete 2/5)	tr|A0A291U517|A0A291U517_9GAMM	complete		0.18	-2.47393	NO_SP	FALSE	FALSE
956	915	A0A291U0R3|A0A291U0R3	11.49	33	5	5	0.5	2.16228	14300000	6420000	12100000	5240000	18495	Dihydrofolate reductase OS=Aeromonas sp. CA23 OX=2033032 GN=CK910_10165 PE=3 SV=1	K00287	M00840Â Tetrahydrofolate biosynthesis, mediated by ribA and trpF, GTP => THFÂ (3)Â Â (incomplete 3/6)	tr|A0A291U0R3|A0A291U0R3_9GAMM	complete		0.43	-1.21759	NO_SP	FALSE	FALSE
1510	3124	A0A291TZ44|A0A291TZ44	16.58	46	3	3	0.75	4.62341	41300000	13700000	41300000	13700000	13544	7 8-dihydroneopterin aldolase OS=Aeromonas sp. CA23 OX=2033032 GN=folB PE=3 SV=1	K01633	M00840Â Tetrahydrofolate biosynthesis, mediated by ribA and trpF, GTP => THFÂ (3)Â Â (incomplete 3/6)	tr|A0A291TZ44|A0A291TZ44_9GAMM	complete		0.33	-1.59946	NO_SP	FALSE	FALSE
41	23	A0A291U5U2|A0A291U5U2	1.73	76	37	37	1.7619	56.7969	1970000000	2280000000	712000000	753000000	45633	Isocitrate dehydrogenase [NADP] OS=Aeromonas sp. CA23 OX=2033032 GN=CK910_20860 PE=4 SV=1	K00031	M00740Â Methylaspartate cycleÂ (3)Â Â (incomplete 3/11)	tr|A0A291U5U2|A0A291U5U2_9GAMM	complete		1.06	0.0840643	NO_SP	FALSE	FALSE
54	38	A0A291U2T3|A0A291U2T3	2.34	81	28	27	1.33333	20.5443	649000000	748000000	255000000	279000000	48026	Citrate synthase OS=Aeromonas sp. CA23 OX=2033032 GN=gltA PE=3 SV=1	K01647	M00740Â Methylaspartate cycleÂ (3)Â Â (incomplete 3/11)	tr|A0A291U2T3|A0A291U2T3_9GAMM	complete		1.09	0.124328	NO_SP	FALSE	FALSE
55	54	A0A291TW78|A0A291TW78	3.29	85	26	26	2	99	4100000000	5180000000	2440000000	3090000000	32085	Malate dehydrogenase OS=Aeromonas sp. CA23 OX=2033032 GN=mdh PE=3 SV=1	K00024	M00740Â Methylaspartate cycleÂ (3)Â Â (incomplete 3/11)	tr|A0A291TW78|A0A291TW78_9GAMM	complete	GH4.hmm	1.27	0.344828	NO_SP	FALSE	FALSE
55	54	A0A291TW78|A0A291TW78	3.29	85	26	26	2	99	4100000000	5180000000	2440000000	3090000000	32085	Malate dehydrogenase OS=Aeromonas sp. CA23 OX=2033032 GN=mdh PE=3 SV=1	K00024	M00740Â Methylaspartate cycleÂ (3)Â Â (incomplete 3/11)	tr|A0A291TW78|A0A291TW78_9GAMM	complete	GH4.hmm	1.27	0.344828	NO_SP	FALSE	FALSE
55	54	A0A291TW78|A0A291TW78	3.29	85	26	26	2	99	4100000000	5180000000	2440000000	3090000000	32085	Malate dehydrogenase OS=Aeromonas sp. CA23 OX=2033032 GN=mdh PE=3 SV=1	K00024	M00740Â Methylaspartate cycleÂ (3)Â Â (incomplete 3/11)	tr|A0A291TW78|A0A291TW78_9GAMM	complete	GH4.hmm	1.27	0.344828	NO_SP	FALSE	FALSE
1646	2198	A0A291U721|A0A291U721	0	9	2	2	0.133333	0.359356	5800000	0	5800000	0	37213	UDP-glucose 4-epimerase OS=Aeromonas sp. CA23 OX=2033032 GN=galE PE=3 SV=1	K01784	M00632Â Galactose degradation, Leloir pathway, galactose => alpha-D-glucose-1PÂ (4)Â Â (complete 4/4)	tr|A0A291TY26|A0A291TY26_9GAMM, tr|A0A291U721|A0A291U721_9GAMM	complete		0	-6.64386	NO_SP	FALSE	FALSE
876	781	A0A291TWZ9|A0A291TWZ9	12.51	48	5	5	0.555556	2.59381	48100000	16900000	45700000	16300000	21961	2-dehydro-3-deoxy-phosphogluconate aldolase OS=Aeromonas sp. CA23 OX=2033032 GN=CK910_03615 PE=3 SV=1	K01625	M00631Â D-Galacturonate degradation (bacteria), D-galacturonate => pyruvate + D-glyceraldehyde 3PÂ (1)Â Â (incomplete 1/5)	tr|A0A291TWZ9|A0A291TWZ9_9GAMM	complete		0.36	-1.47393	NO_SP	FALSE	FALSE
55	54	A0A291TW78|A0A291TW78	3.29	85	26	26	2	99	4100000000	5180000000	2440000000	3090000000	32085	Malate dehydrogenase OS=Aeromonas sp. CA23 OX=2033032 GN=mdh PE=3 SV=1	K00024	M00620Â Incomplete reductive citrate cycle, acetyl-CoA => oxoglutarateÂ (3)Â Â (incomplete 2/7)	tr|A0A291TW78|A0A291TW78_9GAMM	complete	GH4.hmm	1.27	0.344828	NO_SP	FALSE	FALSE
55	54	A0A291TW78|A0A291TW78	3.29	85	26	26	2	99	4100000000	5180000000	2440000000	3090000000	32085	Malate dehydrogenase OS=Aeromonas sp. CA23 OX=2033032 GN=mdh PE=3 SV=1	K00024	M00620Â Incomplete reductive citrate cycle, acetyl-CoA => oxoglutarateÂ (3)Â Â (incomplete 2/7)	tr|A0A291TW78|A0A291TW78_9GAMM	complete	GH4.hmm	1.27	0.344828	NO_SP	FALSE	FALSE
55	54	A0A291TW78|A0A291TW78	3.29	85	26	26	2	99	4100000000	5180000000	2440000000	3090000000	32085	Malate dehydrogenase OS=Aeromonas sp. CA23 OX=2033032 GN=mdh PE=3 SV=1	K00024	M00620Â Incomplete reductive citrate cycle, acetyl-CoA => oxoglutarateÂ (3)Â Â (incomplete 2/7)	tr|A0A291TW78|A0A291TW78_9GAMM	complete	GH4.hmm	1.27	0.344828	NO_SP	FALSE	FALSE
137	171	A0A291U344|A0A291U344	8.9	73	19	19	1.72727	52.367	826000000	2190000000	562000000	1330000000	29830	Succinate--CoA ligase [ADP-forming] subunit alpha OS=Aeromonas sp. CA23 OX=2033032 GN=sucD PE=3 SV=1	K01902	M00620Â Incomplete reductive citrate cycle, acetyl-CoA => oxoglutarateÂ (3)Â Â (incomplete 2/7)	tr|A0A291U344|A0A291U344_9GAMM	complete		2.37	1.24489	NO_SP	FALSE	FALSE
179	109	A0A291U2D1|A0A291U2D1	7.44	59	19	19	1.05556	10.3646	134000000	289000000	77700000	175000000	41434	Succinate--CoA ligase [ADP-forming] subunit beta OS=Aeromonas sp. CA23 OX=2033032 GN=sucC PE=3 SV=1	K01903	M00620Â Incomplete reductive citrate cycle, acetyl-CoA => oxoglutarateÂ (3)Â Â (incomplete 2/7)	tr|A0A291U2D1|A0A291U2D1_9GAMM	complete		2.26	1.17632	NO_SP	FALSE	FALSE
119	523	A0A291U139|A0A291U139	5.01	60	26	26	1.36842	22.3572	2460000000	128000000	1510000000	57400000	41595	S-adenosylmethionine synthase OS=Aeromonas sp. CA23 OX=2033032 GN=metK PE=3 SV=1	K00789	M00609Â Cysteine biosynthesis, methionine => cysteineÂ (3)Â Â (incomplete 3/6)	tr|A0A291U139|A0A291U139_9GAMM	complete		0.04	-4.64386	NO_SP	FALSE	FALSE
323	279	A0A291TWG0|A0A291TWG0	0.15	83	10	10	1	9	912000000	863000000	773000000	772000000	18800	S-ribosylhomocysteine lyase OS=Aeromonas sp. CA23 OX=2033032 GN=luxS PE=3 SV=1	K07173	M00609Â Cysteine biosynthesis, methionine => cysteineÂ (3)Â Â (incomplete 3/6)	tr|A0A291TWG0|A0A291TWG0_9GAMM	complete		1	0	NO_SP	FALSE	FALSE
636	609	A0A291U4G3|A0A291U4G3	6.92	42	6	6	0.75	4.62341	74600000	52300000	70400000	51500000	24624	5'-methylthioadenosine/S-adenosylhomocysteine nucleosidase OS=Aeromonas sp. CA23 OX=2033032 GN=mtnN PE=3 SV=1	K01243	M00609Â Cysteine biosynthesis, methionine => cysteineÂ (3)Â Â (incomplete 3/6)	tr|A0A291TVJ0|A0A291TVJ0_9GAMM, tr|A0A291U4G3|A0A291U4G3_9GAMM	complete		0.73	-0.454032	NO_SP	FALSE	FALSE
1571	1445	A0A291TVJ0|A0A291TVJ0	3.14	5	2	2	0.2	0.584893	2360000	2660000	2360000	2660000	30260	5'-methylthioadenosine nucleosidase OS=Aeromonas sp. CA23 OX=2033032 GN=CK910_00205 PE=4 SV=1	K01243	M00609Â Cysteine biosynthesis, methionine => cysteineÂ (3)Â Â (incomplete 3/6)	tr|A0A291TVJ0|A0A291TVJ0_9GAMM, tr|A0A291U4G3|A0A291U4G3_9GAMM	complete		1.13	0.176323	SP	FALSE	FALSE
456	502	A0A291U1X6|A0A291U1X6	2.27	53	10	10	0.909091	7.11131	68300000	67100000	35700000	34400000	22843	Ribose-5-phosphate isomerase A OS=Aeromonas sp. CA23 OX=2033032 GN=rpiA PE=3 SV=1	K01807	M00580Â Pentose phosphate pathway, archaea, fructose 6P => ribose 5PÂ (1)Â Â (1 block missing 1/2)	tr|A0A291U1X6|A0A291U1X6_9GAMM	incomplete		0.96	-0.0588937	NO_SP	FALSE	FALSE
534	326	A0A291TVB4|A0A291TVB4	19.73	41	12	12	0.631579	3.28133	83400000	13400000	44400000	11400000	43095	Acetate kinase OS=Aeromonas sp. CA23 OX=2033032 GN=ackA PE=3 SV=1	K00925	M00579Â Phosphate acetyltransferase-acetate kinase pathway, acetyl-CoA => acetateÂ (3)Â Â (complete 2/2)	tr|A0A291TVB4|A0A291TVB4_9GAMM, tr|A0A291TZM4|A0A291TZM4_9GAMM	complete		0.26	-1.94342	NO_SP	FALSE	FALSE
763	527	A0A291TZM4|A0A291TZM4	8.86	27	8	8	0.470588	1.95521	27200000	4320000	23600000	4270000	42453	Acetate kinase OS=Aeromonas sp. CA23 OX=2033032 GN=ackA PE=3 SV=1	K00925	M00579Â Phosphate acetyltransferase-acetate kinase pathway, acetyl-CoA => acetateÂ (3)Â Â (complete 2/2)	tr|A0A291TVB4|A0A291TVB4_9GAMM, tr|A0A291TZM4|A0A291TZM4_9GAMM	complete		0.18	-2.47393	NO_SP	FALSE	FALSE
541	616	A0A291U525|A0A291U525	2.24	54	8	8	0.888889	6.74264	95000000	115000000	88200000	107000000	24421	ATP-dependent dethiobiotin synthetase BioD OS=Aeromonas sp. CA23 OX=2033032 GN=bioD PE=3 SV=1	K01935	M00577Â Biotin biosynthesis, BioW pathway, pimelate => pimeloyl-CoA => biotinÂ (4)Â Â (1 block missing 4/5)	tr|A0A291U525|A0A291U525_9GAMM	incomplete		1.21	0.275007	NO_SP	FALSE	FALSE
1556	3189	A0A291U541|A0A291U541	2.39	6	2	2	0.105263	0.274275	2590000	597000	2590000	597000	51835	Adenosylmethionine-8-amino-7-oxononanoate aminotransferase OS=Aeromonas sp. CA23 OX=2033032 GN=bioA PE=3 SV=1	K00833	M00577Â Biotin biosynthesis, BioW pathway, pimelate => pimeloyl-CoA => biotinÂ (4)Â Â (1 block missing 4/5)	tr|A0A291U541|A0A291U541_9GAMM	incomplete		0.23	-2.12029	NO_SP	FALSE	FALSE
541	616	A0A291U525|A0A291U525	2.24	54	8	8	0.888889	6.74264	95000000	115000000	88200000	107000000	24421	ATP-dependent dethiobiotin synthetase BioD OS=Aeromonas sp. CA23 OX=2033032 GN=bioD PE=3 SV=1	K01935	M00573Â Biotin biosynthesis, BioI pathway, long-chain-acyl-ACP => pimeloyl-ACP => biotinÂ (3)Â Â (2 blocks missing 3/5)	tr|A0A291U525|A0A291U525_9GAMM	incomplete		1.21	0.275007	NO_SP	FALSE	FALSE
203	191	A0A291U2C4|A0A291U2C4	0.37	51	19	19	1.11765	12.1113	312000000	172000000	142000000	79000000	42701	Beta-ketoacyl-[acyl-carrier-protein] synthase I OS=Aeromonas sp. CA23 OX=2033032 GN=CK910_15480 PE=3 SV=1	K00647	M00572Â Pimeloyl-ACP biosynthesis, BioC-BioH pathway, malonyl-ACP => pimeloyl-ACPÂ (6)Â Â (1 block missing 5/6)	tr|A0A291U072|A0A291U072_9GAMM, tr|A0A291U2C4|A0A291U2C4_9GAMM	incomplete		0.56	-0.836501	NO_SP	FALSE	FALSE
445	544	A0A291U3M5|A0A291U3M5	0.13	39	8	8	1	9	191000000	172000000	158000000	137000000	25718	3-oxoacyl-[acyl-carrier-protein] reductase OS=Aeromonas sp. CA23 OX=2033032 GN=fabG PE=3 SV=1	K00059	M00572Â Pimeloyl-ACP biosynthesis, BioC-BioH pathway, malonyl-ACP => pimeloyl-ACPÂ (6)Â Â (1 block missing 5/6)	tr|A0A291U3M5|A0A291U3M5_9GAMM, tr|A0A291TYJ5|A0A291TYJ5_9GAMM, tr|A0A291TZY5|A0A291TZY5_9GAMM, tr|A0A291U481|A0A291U481_9GAMM	incomplete		0.87	-0.200913	NO_SP	FALSE	FALSE
549	728	A0A291U481|A0A291U481	10.48	49	9	9	0.75	4.62341	34600000	108000000	27200000	76600000	26483	3-oxoacyl-ACP reductase OS=Aeromonas sp. CA23 OX=2033032 GN=fabG PE=4 SV=1	K00059	M00572Â Pimeloyl-ACP biosynthesis, BioC-BioH pathway, malonyl-ACP => pimeloyl-ACPÂ (6)Â Â (1 block missing 5/6)	tr|A0A291U3M5|A0A291U3M5_9GAMM, tr|A0A291TYJ5|A0A291TYJ5_9GAMM, tr|A0A291TZY5|A0A291TZY5_9GAMM, tr|A0A291U481|A0A291U481_9GAMM	incomplete		2.82	1.4957	NO_SP	FALSE	FALSE
676	1461	A0A291U6J4|A0A291U6J4	7.21	36	8	8	1.6	38.8107	170000000	29400000	149000000	29000000	17096	3-hydroxyacyl-[acyl-carrier-protein] dehydratase FabZ OS=Aeromonas sp. CA23 OX=2033032 GN=fabZ PE=3 SV=1	K02372	M00572Â Pimeloyl-ACP biosynthesis, BioC-BioH pathway, malonyl-ACP => pimeloyl-ACPÂ (6)Â Â (1 block missing 5/6)	tr|A0A291U6J4|A0A291U6J4_9GAMM	incomplete		0.2	-2.32193	NO_SP	FALSE	FALSE
1331	1107	A0A291TYJ5|A0A291TYJ5	9.12	18	4	4	0.363636	1.31013	5550000	7180000	4860000	6370000	25966	3-oxoacyl-ACP reductase OS=Aeromonas sp. CA23 OX=2033032 GN=CK910_05700 PE=4 SV=1	K00059	M00572Â Pimeloyl-ACP biosynthesis, BioC-BioH pathway, malonyl-ACP => pimeloyl-ACPÂ (6)Â Â (1 block missing 5/6)	tr|A0A291U3M5|A0A291U3M5_9GAMM, tr|A0A291TYJ5|A0A291TYJ5_9GAMM, tr|A0A291TZY5|A0A291TZY5_9GAMM, tr|A0A291U481|A0A291U481_9GAMM	incomplete		1.31	0.389567	NO_SP	FALSE	FALSE
1377	1356	A0A291U392|A0A291U392	1.66	11	2	2	0.142857	0.389495	8490000	4730000	7550000	4730000	43115	3-oxoacyl-[acyl-carrier-protein] synthase 2 OS=Aeromonas sp. CA23 OX=2033032 GN=fabF PE=3 SV=1	K09458	M00572Â Pimeloyl-ACP biosynthesis, BioC-BioH pathway, malonyl-ACP => pimeloyl-ACPÂ (6)Â Â (1 block missing 5/6)	tr|A0A291U0E4|A0A291U0E4_9GAMM, tr|A0A291U392|A0A291U392_9GAMM	incomplete		0.63	-0.666576	NO_SP	FALSE	FALSE
1384	984	A0A291TZY5|A0A291TZY5	21.72	15	3	3	0.3	0.995262	8680000	3540000	8680000	3540000	25339	3-oxoacyl-ACP reductase FabG OS=Aeromonas sp. CA23 OX=2033032 GN=CK910_10130 PE=4 SV=1	K00059	M00572Â Pimeloyl-ACP biosynthesis, BioC-BioH pathway, malonyl-ACP => pimeloyl-ACPÂ (6)Â Â (1 block missing 5/6)	tr|A0A291U3M5|A0A291U3M5_9GAMM, tr|A0A291TYJ5|A0A291TYJ5_9GAMM, tr|A0A291TZY5|A0A291TZY5_9GAMM, tr|A0A291U481|A0A291U481_9GAMM	incomplete		0.41	-1.2863	NO_SP	FALSE	FALSE
12	51	A0A291TXL9|A0A291TXL9	11.68	77	44	44	1.76	56.544	3940000000	107000000	1580000000	44100000	53727	Ketol-acid reductoisomerase (NADP(+)) OS=Aeromonas sp. CA23 OX=2033032 GN=ilvC PE=3 SV=1	K00053	M00570Â Isoleucine biosynthesis, threonine => 2-oxobutanoate => isoleucineÂ (7)Â Â (complete 5/5)	tr|A0A291TXL9|A0A291TXL9_9GAMM	complete		0.03	-5.05889	NO_SP	FALSE	FALSE
56	11	A0A291U754|A0A291U754	17.5	74	31	31	1.47619	28.9358	3550000000	4690000	2470000000	2310000	59401	Acetolactate synthase AlsS OS=Aeromonas sp. CA23 OX=2033032 GN=CK910_22695 PE=3 SV=1	K01652	M00570Â Isoleucine biosynthesis, threonine => 2-oxobutanoate => isoleucineÂ (7)Â Â (complete 5/5)	tr|A0A291TVF0|A0A291TVF0_9GAMM, tr|A0A291TYG5|A0A291TYG5_9GAMM, tr|A0A291U754|A0A291U754_9GAMM	complete		0.02	-5.64386	NO_SP	FALSE	FALSE
66	79	A0A291TXS2|A0A291TXS2	10.42	54	31	31	1.14815	13.0653	510000000	98100000	186000000	53300000	65080	Dihydroxy-acid dehydratase OS=Aeromonas sp. CA23 OX=2033032 GN=ilvD PE=3 SV=1	K01687	M00570Â Isoleucine biosynthesis, threonine => 2-oxobutanoate => isoleucineÂ (7)Â Â (complete 5/5)	tr|A0A291TXS2|A0A291TXS2_9GAMM	complete		0.29	-1.78588	NO_SP	FALSE	FALSE
104	105	A0A291TXS3|A0A291TXS3	7.51	61	18	18	1.2	14.8489	4730000000	1840000000	4220000000	1670000000	34350	Branched-chain-amino-acid aminotransferase OS=Aeromonas sp. CA23 OX=2033032 GN=ilvE PE=3 SV=1	K00826	M00570Â Isoleucine biosynthesis, threonine => 2-oxobutanoate => isoleucineÂ (7)Â Â (complete 5/5)	tr|A0A291TXS3|A0A291TXS3_9GAMM	complete		0.39	-1.35845	NO_SP	FALSE	FALSE
345	201	A0A291TY62|A0A291TY62	11.8	27	13	13	0.448276	1.80722	98000000	8410000	78900000	6540000	55451	L-threonine dehydratase OS=Aeromonas sp. CA23 OX=2033032 GN=ilvA PE=3 SV=1	K01754	M00570Â Isoleucine biosynthesis, threonine => 2-oxobutanoate => isoleucineÂ (7)Â Â (complete 5/5)	tr|A0A291TY62|A0A291TY62_9GAMM	complete		0.08	-3.64386	NO_SP	FALSE	FALSE
452	227	A0A291TVM4|A0A291TVM4	21.23	81	11	11	1.1	11.5893	786000000	209000000	591000000	153000000	18123	Acetolactate synthase OS=Aeromonas sp. CA23 OX=2033032 GN=CK910_00530 PE=3 SV=1	K01653	M00570Â Isoleucine biosynthesis, threonine => 2-oxobutanoate => isoleucineÂ (7)Â Â (complete 5/5)	tr|A0A291TVM4|A0A291TVM4_9GAMM	complete		0.26	-1.94342	NO_SP	FALSE	FALSE
976	708	A0A291TVF0|A0A291TVF0	4.44	17	4	4	0.210526	0.623777	17100000	8270000	17000000	7710000	62543	Acetolactate synthase OS=Aeromonas sp. CA23 OX=2033032 GN=CK910_00540 PE=3 SV=1	K01652	M00570Â Isoleucine biosynthesis, threonine => 2-oxobutanoate => isoleucineÂ (7)Â Â (complete 5/5)	tr|A0A291TVF0|A0A291TVF0_9GAMM, tr|A0A291TYG5|A0A291TYG5_9GAMM, tr|A0A291U754|A0A291U754_9GAMM	complete		0.45	-1.152	NO_SP	FALSE	FALSE
143	80	A0A291TZV4|A0A291TZV4	4.61	43	24	24	0.923077	7.37678	150000000	207000000	89800000	111000000	83122	1 4-alpha-glucan branching enzyme GlgB OS=Aeromonas sp. CA23 OX=2033032 GN=glgB PE=3 SV=1	K00700	M00565Â Trehalose biosynthesis, D-glucose 1P => trehaloseÂ (4)Â Â (2 blocks missing 4/6)	tr|A0A291TZV4|A0A291TZV4_9GAMM	incomplete	GH13.hmm	1.24	0.31034	NO_SP	FALSE	FALSE
143	80	A0A291TZV4|A0A291TZV4	4.61	43	24	24	0.923077	7.37678	150000000	207000000	89800000	111000000	83122	1 4-alpha-glucan branching enzyme GlgB OS=Aeromonas sp. CA23 OX=2033032 GN=glgB PE=3 SV=1	K00700	M00565Â Trehalose biosynthesis, D-glucose 1P => trehaloseÂ (4)Â Â (2 blocks missing 4/6)	tr|A0A291TZV4|A0A291TZV4_9GAMM	incomplete	CBM48.hmm	1.24	0.31034	NO_SP	FALSE	FALSE
143	80	A0A291TZV4|A0A291TZV4	4.61	43	24	24	0.923077	7.37678	150000000	207000000	89800000	111000000	83122	1 4-alpha-glucan branching enzyme GlgB OS=Aeromonas sp. CA23 OX=2033032 GN=glgB PE=3 SV=1	K00700	M00565Â Trehalose biosynthesis, D-glucose 1P => trehaloseÂ (4)Â Â (2 blocks missing 4/6)	tr|A0A291TZV4|A0A291TZV4_9GAMM	incomplete	CBM48.hmm	1.24	0.31034	NO_SP	FALSE	FALSE
143	80	A0A291TZV4|A0A291TZV4	4.61	43	24	24	0.923077	7.37678	150000000	207000000	89800000	111000000	83122	1 4-alpha-glucan branching enzyme GlgB OS=Aeromonas sp. CA23 OX=2033032 GN=glgB PE=3 SV=1	K00700	M00565Â Trehalose biosynthesis, D-glucose 1P => trehaloseÂ (4)Â Â (2 blocks missing 4/6)	tr|A0A291TZV4|A0A291TZV4_9GAMM	incomplete	GH70.hmm	1.24	0.31034	NO_SP	FALSE	FALSE
143	80	A0A291TZV4|A0A291TZV4	4.61	43	24	24	0.923077	7.37678	150000000	207000000	89800000	111000000	83122	1 4-alpha-glucan branching enzyme GlgB OS=Aeromonas sp. CA23 OX=2033032 GN=glgB PE=3 SV=1	K00700	M00565Â Trehalose biosynthesis, D-glucose 1P => trehaloseÂ (4)Â Â (2 blocks missing 4/6)	tr|A0A291TZV4|A0A291TZV4_9GAMM	incomplete	GH5.hmm	1.24	0.31034	NO_SP	FALSE	FALSE
143	80	A0A291TZV4|A0A291TZV4	4.61	43	24	24	0.923077	7.37678	150000000	207000000	89800000	111000000	83122	1 4-alpha-glucan branching enzyme GlgB OS=Aeromonas sp. CA23 OX=2033032 GN=glgB PE=3 SV=1	K00700	M00565Â Trehalose biosynthesis, D-glucose 1P => trehaloseÂ (4)Â Â (2 blocks missing 4/6)	tr|A0A291TZV4|A0A291TZV4_9GAMM	incomplete	GH5.hmm	1.24	0.31034	NO_SP	FALSE	FALSE
161	85	A0A291U1Q3|A0A291U1Q3	4.53	49	22	22	1.22222	15.681	487000000	194000000	318000000	136000000	47084	Glucose-1-phosphate adenylyltransferase OS=Aeromonas sp. CA23 OX=2033032 GN=glgC PE=3 SV=1	K00975	M00565Â Trehalose biosynthesis, D-glucose 1P => trehaloseÂ (4)Â Â (2 blocks missing 4/6)	tr|A0A291U1Q3|A0A291U1Q3_9GAMM, tr|A0A291TYZ9|A0A291TYZ9_9GAMM	incomplete		0.43	-1.21759	NO_SP	FALSE	FALSE
164	45	A0A291TYZ9|A0A291TYZ9	8.12	77	27	27	1.125	12.3352	657000000	253000000	376000000	158000000	45293	Glucose-1-phosphate adenylyltransferase OS=Aeromonas sp. CA23 OX=2033032 GN=glgC PE=3 SV=1	K00975	M00565Â Trehalose biosynthesis, D-glucose 1P => trehaloseÂ (4)Â Â (2 blocks missing 4/6)	tr|A0A291U1Q3|A0A291U1Q3_9GAMM, tr|A0A291TYZ9|A0A291TYZ9_9GAMM	incomplete		0.42	-1.25154	NO_SP	FALSE	FALSE
304	169	A0A291TZA0|A0A291TZA0	0.23	36	15	15	0.9375	7.65964	118000000	54000000	74400000	44000000	54913	Glycogen synthase OS=Aeromonas sp. CA23 OX=2033032 GN=glgA PE=3 SV=1	K00703	M00565Â Trehalose biosynthesis, D-glucose 1P => trehaloseÂ (4)Â Â (2 blocks missing 4/6)	tr|A0A291TZA0|A0A291TZA0_9GAMM	incomplete	GT5.hmm	0.59	-0.761213	NO_SP	FALSE	FALSE
304	169	A0A291TZA0|A0A291TZA0	0.23	36	15	15	0.9375	7.65964	118000000	54000000	74400000	44000000	54913	Glycogen synthase OS=Aeromonas sp. CA23 OX=2033032 GN=glgA PE=3 SV=1	K00703	M00565Â Trehalose biosynthesis, D-glucose 1P => trehaloseÂ (4)Â Â (2 blocks missing 4/6)	tr|A0A291TZA0|A0A291TZA0_9GAMM	incomplete	GT4.hmm	0.59	-0.761213	NO_SP	FALSE	FALSE
536	450	A0A291TZ86|A0A291TZ86	1.22	17	6	6	0.222222	0.668101	7000000	481000	4980000	481000	79962	Glycogen debranching enzyme GlgX OS=Aeromonas sp. CA23 OX=2033032 GN=glgX PE=3 SV=1	K01214	M00565Â Trehalose biosynthesis, D-glucose 1P => trehaloseÂ (4)Â Â (2 blocks missing 4/6)	tr|A0A291TZ86|A0A291TZ86_9GAMM, tr|A0A291U3U1|A0A291U3U1_9GAMM	incomplete	GH13.hmm	0.1	-3.32193	NO_SP	FALSE	FALSE
536	450	A0A291TZ86|A0A291TZ86	1.22	17	6	6	0.222222	0.668101	7000000	481000	4980000	481000	79962	Glycogen debranching enzyme GlgX OS=Aeromonas sp. CA23 OX=2033032 GN=glgX PE=3 SV=1	K01214	M00565Â Trehalose biosynthesis, D-glucose 1P => trehaloseÂ (4)Â Â (2 blocks missing 4/6)	tr|A0A291TZ86|A0A291TZ86_9GAMM, tr|A0A291U3U1|A0A291U3U1_9GAMM	incomplete	CBM48.hmm	0.1	-3.32193	NO_SP	FALSE	FALSE
536	450	A0A291TZ86|A0A291TZ86	1.22	17	6	6	0.222222	0.668101	7000000	481000	4980000	481000	79962	Glycogen debranching enzyme GlgX OS=Aeromonas sp. CA23 OX=2033032 GN=glgX PE=3 SV=1	K01214	M00565Â Trehalose biosynthesis, D-glucose 1P => trehaloseÂ (4)Â Â (2 blocks missing 4/6)	tr|A0A291TZ86|A0A291TZ86_9GAMM, tr|A0A291U3U1|A0A291U3U1_9GAMM	incomplete	CBM48.hmm	0.1	-3.32193	NO_SP	FALSE	FALSE
536	450	A0A291TZ86|A0A291TZ86	1.22	17	6	6	0.222222	0.668101	7000000	481000	4980000	481000	79962	Glycogen debranching enzyme GlgX OS=Aeromonas sp. CA23 OX=2033032 GN=glgX PE=3 SV=1	K01214	M00565Â Trehalose biosynthesis, D-glucose 1P => trehaloseÂ (4)Â Â (2 blocks missing 4/6)	tr|A0A291TZ86|A0A291TZ86_9GAMM, tr|A0A291U3U1|A0A291U3U1_9GAMM	incomplete	GH5.hmm	0.1	-3.32193	NO_SP	FALSE	FALSE
2	40	A0A291TZV8|A0A291TZV8	26.74	98	55	55	3.66667	4640.59	23200000000	5190000000	7890000000	1790000000	35049	Glyceraldehyde-3-phosphate dehydrogenase OS=Aeromonas sp. CA23 OX=2033032 GN=gap PE=3 SV=1	K00134	M00552Â D-galactonate degradation, De Ley-Doudoroff pathway, D-galactonate => glycerate-3PÂ (2)Â Â (incomplete 2/5)	tr|A0A291U0G4|A0A291U0G4_9GAMM, tr|A0A291TZV8|A0A291TZV8_9GAMM	complete		0.23	-2.12029	NO_SP	FALSE	CORRECT
68	15	A0A291TW01|A0A291TW01	12.91	89	35	35	1.84211	68.5193	2560000000	627000000	1270000000	326000000	40465	Phosphoglycerate kinase OS=Aeromonas sp. CA23 OX=2033032 GN=pgk PE=3 SV=1	K00927	M00552Â D-galactonate degradation, De Ley-Doudoroff pathway, D-galactonate => glycerate-3PÂ (2)Â Â (incomplete 2/5)	tr|A0A291TW01|A0A291TW01_9GAMM	complete		0.26	-1.94342	NO_SP	FALSE	FALSE
866	593	A0A291U0G4|A0A291U0G4	0.77	20	5	5	0.384615	1.42446	15100000	8980000	11700000	8470000	51830	Glyceraldehyde-3-phosphate dehydrogenase OS=Aeromonas sp. CA23 OX=2033032 GN=CK910_10235 PE=3 SV=1	K00134	M00552Â D-galactonate degradation, De Ley-Doudoroff pathway, D-galactonate => glycerate-3PÂ (2)Â Â (incomplete 2/5)	tr|A0A291U0G4|A0A291U0G4_9GAMM, tr|A0A291TZV8|A0A291TZV8_9GAMM	complete		0.72	-0.473931	NO_SP	FALSE	FALSE
208	154	A0A291U5M4|A0A291U5M4	0.9	36	13	13	0.448276	1.80722	105000000	121000000	78000000	92200000	59185	Phosphoglucomutase (alpha-D-glucose-1 6-bisphosphate-dependent) OS=Aeromonas sp. CA23 OX=2033032 GN=CK910_20285 PE=3 SV=1	K01835	M00549Â Nucleotide sugar biosynthesis, glucose => UDP-glucoseÂ (4)Â Â (complete 3/3)	tr|A0A291U5M4|A0A291U5M4_9GAMM	complete		1.18	0.238787	NO_SP	FALSE	FALSE
455	383	A0A291U764|A0A291U764	2.04	32	10	10	0.833333	5.81292	86600000	45600000	64200000	35200000	33620	UTP--glucose-1-phosphate uridylyltransferase OS=Aeromonas sp. CA23 OX=2033032 GN=galU PE=3 SV=1	K00963	M00549Â Nucleotide sugar biosynthesis, glucose => UDP-glucoseÂ (4)Â Â (complete 3/3)	tr|A0A291U764|A0A291U764_9GAMM	complete		0.55	-0.862496	NO_SP	FALSE	FALSE
674	316	A0A291U630|A0A291U630	16.38	36	11	11	0.846154	6.01704	159000000	34300000	133000000	30100000	34170	Glucokinase OS=Aeromonas sp. CA23 OX=2033032 GN=glk PE=3 SV=1	K00845	M00549Â Nucleotide sugar biosynthesis, glucose => UDP-glucoseÂ (4)Â Â (complete 3/3)	tr|A0A291U630|A0A291U630_9GAMM	complete		0.23	-2.12029	NO_SP	FALSE	FALSE
1458	1296	A0A291TVM8|A0A291TVM8	0	18	2	2	0.25	0.778279	1750000	700000	1750000	700000	26904	ROK family protein OS=Aeromonas sp. CA23 OX=2033032 GN=CK910_00390 PE=4 SV=1	K00886	M00549Â Nucleotide sugar biosynthesis, glucose => UDP-glucoseÂ (4)Â Â (complete 3/3)	tr|A0A291TVM8|A0A291TVM8_9GAMM	complete		0.4	-1.32193	NO_SP	FALSE	FALSE
194	176	A0A291TVC4|A0A291TVC4	11.18	42	14	14	1	9	900000000	315000000	603000000	197000000	38858	3-isopropylmalate dehydrogenase OS=Aeromonas sp. CA23 OX=2033032 GN=leuB PE=3 SV=1	K00052	M00535Â Isoleucine biosynthesis, pyruvate => 2-oxobutanoateÂ (3)Â Â (1 block missing 2/3)	tr|A0A291TVC4|A0A291TVC4_9GAMM	incomplete		0.33	-1.59946	NO_SP	FALSE	FALSE
245	133	A0A291TV81|A0A291TV81	5.37	34	17	17	0.85	6.07946	127000000	35200000	90900000	23000000	49803	3-isopropylmalate dehydratase large subunit OS=Aeromonas sp. CA23 OX=2033032 GN=leuC PE=3 SV=1	K01703	M00535Â Isoleucine biosynthesis, pyruvate => 2-oxobutanoateÂ (3)Â Â (1 block missing 2/3)	tr|A0A291TV81|A0A291TV81_9GAMM	incomplete		0.25	-2	NO_SP	FALSE	FALSE
679	516	A0A291TVN7|A0A291TVN7	22.47	38	5	5	0.555556	2.59381	192000000	50200000	170000000	47700000	22042	3-isopropylmalate dehydratase small subunit OS=Aeromonas sp. CA23 OX=2033032 GN=leuD PE=3 SV=1	K01704	M00535Â Isoleucine biosynthesis, pyruvate => 2-oxobutanoateÂ (3)Â Â (1 block missing 2/3)	tr|A0A291TVN7|A0A291TVN7_9GAMM	incomplete		0.28	-1.8365	NO_SP	FALSE	FALSE
39	39	A0A291TZD1|A0A291TZD1	2.52	67	33	33	1.65	43.6684	1440000000	628000000	709000000	289000000	50367	Dihydrolipoyl dehydrogenase OS=Aeromonas sp. CA23 OX=2033032 GN=lpdA PE=3 SV=1	K00382	M00532Â PhotorespirationÂ (6)Â Â (incomplete 3/10)	tr|A0A291TZD1|A0A291TZD1_9GAMM	complete		0.41	-1.2863	NO_SP	FALSE	FALSE
51	33	A0A291U0L3|A0A291U0L3	6.11	82	29	29	1.52632	32.5982	1980000000	682000000	786000000	239000000	45482	Serine hydroxymethyltransferase OS=Aeromonas sp. CA23 OX=2033032 GN=glyA PE=3 SV=1	K00600	M00532Â PhotorespirationÂ (6)Â Â (incomplete 3/10)	tr|A0A291U0L3|A0A291U0L3_9GAMM	complete		0.3	-1.73697	NO_SP	FALSE	FALSE
103	57	A0A291U5C1|A0A291U5C1	3.78	37	27	27	0.658537	3.55551	436000000	133000000	236000000	78300000	103330	Glycine dehydrogenase (decarboxylating) OS=Aeromonas sp. CA23 OX=2033032 GN=gcvP PE=3 SV=1	K00281	M00532Â PhotorespirationÂ (6)Â Â (incomplete 3/10)	tr|A0A291U5C1|A0A291U5C1_9GAMM	complete		0.33	-1.59946	NO_SP	FALSE	FALSE
158	140	A0A291U4H6|A0A291U4H6	6.41	72	18	18	1.5	30.6228	491000000	102000000	192000000	54200000	39690	Aminomethyltransferase OS=Aeromonas sp. CA23 OX=2033032 GN=gcvT PE=3 SV=1	K00605	M00532Â PhotorespirationÂ (6)Â Â (incomplete 3/10)	tr|A0A291U4H6|A0A291U4H6_9GAMM	complete		0.28	-1.8365	NO_SP	FALSE	FALSE
234	376	A0A291TYB6|A0A291TYB6	0.12	45	18	18	0.75	4.62341	149000000	73600000	68300000	41400000	54473	Catalase OS=Aeromonas sp. CA23 OX=2033032 GN=CK910_06580 PE=3 SV=1	K03781	M00532Â PhotorespirationÂ (6)Â Â (incomplete 3/10)	tr|A0A291TYB6|A0A291TYB6_9GAMM	complete		0.61	-0.713119	NO_SP	FALSE	FALSE
1700	2115	A0A291U4N4|A0A291U4N4	9.29	13	3	3	0.75	4.62341	110000000	48100000	109000000	47900000	13858	Glycine cleavage system H protein OS=Aeromonas sp. CA23 OX=2033032 GN=gcvH PE=3 SV=1	K02437	M00532Â PhotorespirationÂ (6)Â Â (incomplete 3/10)	tr|A0A291U4N4|A0A291U4N4_9GAMM	complete		0.44	-1.18442	NO_SP	FALSE	FALSE
491	608	A0A291U5D3|A0A291U5D3	7.37	8	5	5	0.119048	0.315369	7730000	3090000	4700000	2000000	92855	Periplasmic nitrate reductase OS=Aeromonas sp. CA23 OX=2033032 GN=napA PE=3 SV=1	K02567	M00530Â Dissimilatory nitrate reduction, nitrate => ammoniaÂ (5)Â Â (complete 2/2)	tr|A0A291U5D3|A0A291U5D3_9GAMM	complete		0.42	-1.25154	TAT	FALSE	FALSE
970	1670	A0A291U3M0|A0A291U3M0	7.56	10	4	4	0.16	0.44544	3860000	12400000	3710000	11500000	53554	Cytochrome c-552 OS=Aeromonas sp. CA23 OX=2033032 GN=nrfA PE=3 SV=1	K03385	M00530Â Dissimilatory nitrate reduction, nitrate => ammoniaÂ (5)Â Â (complete 2/2)	tr|A0A291U3M0|A0A291U3M0_9GAMM	complete		3.09	1.62761	SP	FALSE	FALSE
491	608	A0A291U5D3|A0A291U5D3	7.37	8	5	5	0.119048	0.315369	7730000	3090000	4700000	2000000	92855	Periplasmic nitrate reductase OS=Aeromonas sp. CA23 OX=2033032 GN=napA PE=3 SV=1	K02567	M00529Â Denitrification, nitrate => nitrogenÂ (2)Â Â (incomplete 1/4)	tr|A0A291U5D3|A0A291U5D3_9GAMM	complete		0.42	-1.25154	TAT	FALSE	FALSE
73	88	A0A291U337|A0A291U337	5.33	71	24	24	1.71429	50.7947	824000000	366000000	405000000	204000000	40044	Aspartate-semialdehyde dehydrogenase OS=Aeromonas sp. CA23 OX=2033032 GN=asd PE=3 SV=1	K00133	M00527Â Lysine biosynthesis, DAP aminotransferase pathway, aspartate => lysineÂ (8)Â Â (1 block missing 6/7)	tr|A0A291U337|A0A291U337_9GAMM, tr|A0A291U2B2|A0A291U2B2_9GAMM	incomplete		0.5	-1	NO_SP	FALSE	FALSE
124	99	A0A291TYQ1|A0A291TYQ1	10.23	97	19	19	1.72727	52.367	1800000000	495000000	1140000000	344000000	31252	4-hydroxy-tetrahydrodipicolinate synthase OS=Aeromonas sp. CA23 OX=2033032 GN=dapA PE=3 SV=1	K01714	M00527Â Lysine biosynthesis, DAP aminotransferase pathway, aspartate => lysineÂ (8)Â Â (1 block missing 6/7)	tr|A0A291TVM1|A0A291TVM1_9GAMM, tr|A0A291TYQ1|A0A291TYQ1_9GAMM	incomplete		0.3	-1.73697	NO_SP	FALSE	FALSE
227	113	A0A291TWS7|A0A291TWS7	1.12	54	18	18	1.05882	10.4505	210000000	136000000	107000000	82100000	45318	Diaminopimelate decarboxylase OS=Aeromonas sp. CA23 OX=2033032 GN=lysA PE=3 SV=1	K01586	M00527Â Lysine biosynthesis, DAP aminotransferase pathway, aspartate => lysineÂ (8)Â Â (1 block missing 6/7)	tr|A0A291TWS7|A0A291TWS7_9GAMM	incomplete		0.77	-0.37707	NO_SP	FALSE	FALSE
343	106	A0A291U2R2|A0A291U2R2	4.5	50	16	16	0.941176	7.73326	298000000	46700000	159000000	30500000	47986	Aspartokinase OS=Aeromonas sp. CA23 OX=2033032 GN=CK910_14850 PE=3 SV=1	K00928	M00527Â Lysine biosynthesis, DAP aminotransferase pathway, aspartate => lysineÂ (8)Â Â (1 block missing 6/7)	tr|A0A291TZ83|A0A291TZ83_9GAMM, tr|A0A291U2R2|A0A291U2R2_9GAMM	incomplete		0.19	-2.39593	NO_SP	FALSE	FALSE
363	204	A0A291TZ83|A0A291TZ83	2.08	44	13	13	0.619048	3.15956	171000000	119000000	146000000	105000000	44462	Aspartokinase OS=Aeromonas sp. CA23 OX=2033032 GN=CK910_08195 PE=3 SV=1	K00928	M00527Â Lysine biosynthesis, DAP aminotransferase pathway, aspartate => lysineÂ (8)Â Â (1 block missing 6/7)	tr|A0A291TZ83|A0A291TZ83_9GAMM, tr|A0A291U2R2|A0A291U2R2_9GAMM	incomplete		0.72	-0.473931	NO_SP	FALSE	FALSE
594	262	A0A291TVM1|A0A291TVM1	0.92	41	8	8	0.8	5.30957	34300000	20200000	17600000	9670000	30825	4-hydroxy-tetrahydrodipicolinate synthase OS=Aeromonas sp. CA23 OX=2033032 GN=dapA PE=3 SV=1	K01714	M00527Â Lysine biosynthesis, DAP aminotransferase pathway, aspartate => lysineÂ (8)Â Â (1 block missing 6/7)	tr|A0A291TVM1|A0A291TVM1_9GAMM, tr|A0A291TYQ1|A0A291TYQ1_9GAMM	incomplete		0.55	-0.862496	NO_SP	FALSE	FALSE
635	400	A0A291U2B2|A0A291U2B2	0.71	38	7	7	0.583333	2.83119	30800000	25900000	18600000	19100000	36784	Aspartate-semialdehyde dehydrogenase OS=Aeromonas sp. CA23 OX=2033032 GN=asd PE=3 SV=1	K00133	M00527Â Lysine biosynthesis, DAP aminotransferase pathway, aspartate => lysineÂ (8)Â Â (1 block missing 6/7)	tr|A0A291U337|A0A291U337_9GAMM, tr|A0A291U2B2|A0A291U2B2_9GAMM	incomplete		1.02	0.0285692	NO_SP	FALSE	FALSE
925	884	A0A291U262|A0A291U262	11.78	20	6	6	0.545455	2.51119	37600000	2270000	23100000	1190000	28655	4-hydroxy-tetrahydrodipicolinate reductase OS=Aeromonas sp. CA23 OX=2033032 GN=dapB PE=3 SV=1	K00215	M00527Â Lysine biosynthesis, DAP aminotransferase pathway, aspartate => lysineÂ (8)Â Â (1 block missing 6/7)	tr|A0A291U262|A0A291U262_9GAMM	incomplete		0.05	-4.32193	NO_SP	FALSE	FALSE
1598	1818	A0A291TWB1|A0A291TWB1	1.78	6	2	2	0.2	0.584893	1080000	917000	1080000	917000	30375	Diaminopimelate epimerase OS=Aeromonas sp. CA23 OX=2033032 GN=dapF PE=3 SV=1	K01778	M00527Â Lysine biosynthesis, DAP aminotransferase pathway, aspartate => lysineÂ (8)Â Â (1 block missing 6/7)	tr|A0A291TWB1|A0A291TWB1_9GAMM	incomplete		0.85	-0.234465	NO_SP	FALSE	FALSE
73	88	A0A291U337|A0A291U337	5.33	71	24	24	1.71429	50.7947	824000000	366000000	405000000	204000000	40044	Aspartate-semialdehyde dehydrogenase OS=Aeromonas sp. CA23 OX=2033032 GN=asd PE=3 SV=1	K00133	M00526Â Lysine biosynthesis, DAP dehydrogenase pathway, aspartate => lysineÂ (7)Â Â (1 block missing 5/6)	tr|A0A291U337|A0A291U337_9GAMM, tr|A0A291U2B2|A0A291U2B2_9GAMM	incomplete		0.5	-1	NO_SP	FALSE	FALSE
124	99	A0A291TYQ1|A0A291TYQ1	10.23	97	19	19	1.72727	52.367	1800000000	495000000	1140000000	344000000	31252	4-hydroxy-tetrahydrodipicolinate synthase OS=Aeromonas sp. CA23 OX=2033032 GN=dapA PE=3 SV=1	K01714	M00526Â Lysine biosynthesis, DAP dehydrogenase pathway, aspartate => lysineÂ (7)Â Â (1 block missing 5/6)	tr|A0A291TVM1|A0A291TVM1_9GAMM, tr|A0A291TYQ1|A0A291TYQ1_9GAMM	incomplete		0.3	-1.73697	NO_SP	FALSE	FALSE
227	113	A0A291TWS7|A0A291TWS7	1.12	54	18	18	1.05882	10.4505	210000000	136000000	107000000	82100000	45318	Diaminopimelate decarboxylase OS=Aeromonas sp. CA23 OX=2033032 GN=lysA PE=3 SV=1	K01586	M00526Â Lysine biosynthesis, DAP dehydrogenase pathway, aspartate => lysineÂ (7)Â Â (1 block missing 5/6)	tr|A0A291TWS7|A0A291TWS7_9GAMM	incomplete		0.77	-0.37707	NO_SP	FALSE	FALSE
343	106	A0A291U2R2|A0A291U2R2	4.5	50	16	16	0.941176	7.73326	298000000	46700000	159000000	30500000	47986	Aspartokinase OS=Aeromonas sp. CA23 OX=2033032 GN=CK910_14850 PE=3 SV=1	K00928	M00526Â Lysine biosynthesis, DAP dehydrogenase pathway, aspartate => lysineÂ (7)Â Â (1 block missing 5/6)	tr|A0A291TZ83|A0A291TZ83_9GAMM, tr|A0A291U2R2|A0A291U2R2_9GAMM	incomplete		0.19	-2.39593	NO_SP	FALSE	FALSE
363	204	A0A291TZ83|A0A291TZ83	2.08	44	13	13	0.619048	3.15956	171000000	119000000	146000000	105000000	44462	Aspartokinase OS=Aeromonas sp. CA23 OX=2033032 GN=CK910_08195 PE=3 SV=1	K00928	M00526Â Lysine biosynthesis, DAP dehydrogenase pathway, aspartate => lysineÂ (7)Â Â (1 block missing 5/6)	tr|A0A291TZ83|A0A291TZ83_9GAMM, tr|A0A291U2R2|A0A291U2R2_9GAMM	incomplete		0.72	-0.473931	NO_SP	FALSE	FALSE
594	262	A0A291TVM1|A0A291TVM1	0.92	41	8	8	0.8	5.30957	34300000	20200000	17600000	9670000	30825	4-hydroxy-tetrahydrodipicolinate synthase OS=Aeromonas sp. CA23 OX=2033032 GN=dapA PE=3 SV=1	K01714	M00526Â Lysine biosynthesis, DAP dehydrogenase pathway, aspartate => lysineÂ (7)Â Â (1 block missing 5/6)	tr|A0A291TVM1|A0A291TVM1_9GAMM, tr|A0A291TYQ1|A0A291TYQ1_9GAMM	incomplete		0.55	-0.862496	NO_SP	FALSE	FALSE
635	400	A0A291U2B2|A0A291U2B2	0.71	38	7	7	0.583333	2.83119	30800000	25900000	18600000	19100000	36784	Aspartate-semialdehyde dehydrogenase OS=Aeromonas sp. CA23 OX=2033032 GN=asd PE=3 SV=1	K00133	M00526Â Lysine biosynthesis, DAP dehydrogenase pathway, aspartate => lysineÂ (7)Â Â (1 block missing 5/6)	tr|A0A291U337|A0A291U337_9GAMM, tr|A0A291U2B2|A0A291U2B2_9GAMM	incomplete		1.02	0.0285692	NO_SP	FALSE	FALSE
925	884	A0A291U262|A0A291U262	11.78	20	6	6	0.545455	2.51119	37600000	2270000	23100000	1190000	28655	4-hydroxy-tetrahydrodipicolinate reductase OS=Aeromonas sp. CA23 OX=2033032 GN=dapB PE=3 SV=1	K00215	M00526Â Lysine biosynthesis, DAP dehydrogenase pathway, aspartate => lysineÂ (7)Â Â (1 block missing 5/6)	tr|A0A291U262|A0A291U262_9GAMM	incomplete		0.05	-4.32193	NO_SP	FALSE	FALSE
73	88	A0A291U337|A0A291U337	5.33	71	24	24	1.71429	50.7947	824000000	366000000	405000000	204000000	40044	Aspartate-semialdehyde dehydrogenase OS=Aeromonas sp. CA23 OX=2033032 GN=asd PE=3 SV=1	K00133	M00525Â Lysine biosynthesis, acetyl-DAP pathway, aspartate => lysineÂ (6)Â Â (incomplete 6/9)	tr|A0A291U337|A0A291U337_9GAMM, tr|A0A291U2B2|A0A291U2B2_9GAMM	complete		0.5	-1	NO_SP	FALSE	FALSE
124	99	A0A291TYQ1|A0A291TYQ1	10.23	97	19	19	1.72727	52.367	1800000000	495000000	1140000000	344000000	31252	4-hydroxy-tetrahydrodipicolinate synthase OS=Aeromonas sp. CA23 OX=2033032 GN=dapA PE=3 SV=1	K01714	M00525Â Lysine biosynthesis, acetyl-DAP pathway, aspartate => lysineÂ (6)Â Â (incomplete 6/9)	tr|A0A291TVM1|A0A291TVM1_9GAMM, tr|A0A291TYQ1|A0A291TYQ1_9GAMM	complete		0.3	-1.73697	NO_SP	FALSE	FALSE
227	113	A0A291TWS7|A0A291TWS7	1.12	54	18	18	1.05882	10.4505	210000000	136000000	107000000	82100000	45318	Diaminopimelate decarboxylase OS=Aeromonas sp. CA23 OX=2033032 GN=lysA PE=3 SV=1	K01586	M00525Â Lysine biosynthesis, acetyl-DAP pathway, aspartate => lysineÂ (6)Â Â (incomplete 6/9)	tr|A0A291TWS7|A0A291TWS7_9GAMM	complete		0.77	-0.37707	NO_SP	FALSE	FALSE
343	106	A0A291U2R2|A0A291U2R2	4.5	50	16	16	0.941176	7.73326	298000000	46700000	159000000	30500000	47986	Aspartokinase OS=Aeromonas sp. CA23 OX=2033032 GN=CK910_14850 PE=3 SV=1	K00928	M00525Â Lysine biosynthesis, acetyl-DAP pathway, aspartate => lysineÂ (6)Â Â (incomplete 6/9)	tr|A0A291TZ83|A0A291TZ83_9GAMM, tr|A0A291U2R2|A0A291U2R2_9GAMM	complete		0.19	-2.39593	NO_SP	FALSE	FALSE
363	204	A0A291TZ83|A0A291TZ83	2.08	44	13	13	0.619048	3.15956	171000000	119000000	146000000	105000000	44462	Aspartokinase OS=Aeromonas sp. CA23 OX=2033032 GN=CK910_08195 PE=3 SV=1	K00928	M00525Â Lysine biosynthesis, acetyl-DAP pathway, aspartate => lysineÂ (6)Â Â (incomplete 6/9)	tr|A0A291TZ83|A0A291TZ83_9GAMM, tr|A0A291U2R2|A0A291U2R2_9GAMM	complete		0.72	-0.473931	NO_SP	FALSE	FALSE
594	262	A0A291TVM1|A0A291TVM1	0.92	41	8	8	0.8	5.30957	34300000	20200000	17600000	9670000	30825	4-hydroxy-tetrahydrodipicolinate synthase OS=Aeromonas sp. CA23 OX=2033032 GN=dapA PE=3 SV=1	K01714	M00525Â Lysine biosynthesis, acetyl-DAP pathway, aspartate => lysineÂ (6)Â Â (incomplete 6/9)	tr|A0A291TVM1|A0A291TVM1_9GAMM, tr|A0A291TYQ1|A0A291TYQ1_9GAMM	complete		0.55	-0.862496	NO_SP	FALSE	FALSE
635	400	A0A291U2B2|A0A291U2B2	0.71	38	7	7	0.583333	2.83119	30800000	25900000	18600000	19100000	36784	Aspartate-semialdehyde dehydrogenase OS=Aeromonas sp. CA23 OX=2033032 GN=asd PE=3 SV=1	K00133	M00525Â Lysine biosynthesis, acetyl-DAP pathway, aspartate => lysineÂ (6)Â Â (incomplete 6/9)	tr|A0A291U337|A0A291U337_9GAMM, tr|A0A291U2B2|A0A291U2B2_9GAMM	complete		1.02	0.0285692	NO_SP	FALSE	FALSE
925	884	A0A291U262|A0A291U262	11.78	20	6	6	0.545455	2.51119	37600000	2270000	23100000	1190000	28655	4-hydroxy-tetrahydrodipicolinate reductase OS=Aeromonas sp. CA23 OX=2033032 GN=dapB PE=3 SV=1	K00215	M00525Â Lysine biosynthesis, acetyl-DAP pathway, aspartate => lysineÂ (6)Â Â (incomplete 6/9)	tr|A0A291U262|A0A291U262_9GAMM	complete		0.05	-4.32193	NO_SP	FALSE	FALSE
1598	1818	A0A291TWB1|A0A291TWB1	1.78	6	2	2	0.2	0.584893	1080000	917000	1080000	917000	30375	Diaminopimelate epimerase OS=Aeromonas sp. CA23 OX=2033032 GN=dapF PE=3 SV=1	K01778	M00525Â Lysine biosynthesis, acetyl-DAP pathway, aspartate => lysineÂ (6)Â Â (incomplete 6/9)	tr|A0A291TWB1|A0A291TWB1_9GAMM	complete		0.85	-0.234465	NO_SP	FALSE	FALSE
194	176	A0A291TVC4|A0A291TVC4	11.18	42	14	14	1	9	900000000	315000000	603000000	197000000	38858	3-isopropylmalate dehydrogenase OS=Aeromonas sp. CA23 OX=2033032 GN=leuB PE=3 SV=1	K00052	M00432Â Leucine biosynthesis, 2-oxoisovalerate => 2-oxoisocaproateÂ (4)Â Â (complete 3/3)	tr|A0A291TVC4|A0A291TVC4_9GAMM	complete		0.33	-1.59946	NO_SP	FALSE	FALSE
245	133	A0A291TV81|A0A291TV81	5.37	34	17	17	0.85	6.07946	127000000	35200000	90900000	23000000	49803	3-isopropylmalate dehydratase large subunit OS=Aeromonas sp. CA23 OX=2033032 GN=leuC PE=3 SV=1	K01703	M00432Â Leucine biosynthesis, 2-oxoisovalerate => 2-oxoisocaproateÂ (4)Â Â (complete 3/3)	tr|A0A291TV81|A0A291TV81_9GAMM	complete		0.25	-2	NO_SP	FALSE	FALSE
404	159	A0A291TVJ7|A0A291TVJ7	3.85	30	11	11	0.5	2.16228	42800000	42000000	23500000	31700000	57347	2-isopropylmalate synthase OS=Aeromonas sp. CA23 OX=2033032 GN=leuA PE=3 SV=1	K01649	M00432Â Leucine biosynthesis, 2-oxoisovalerate => 2-oxoisocaproateÂ (4)Â Â (complete 3/3)	tr|A0A291U273|A0A291U273_9GAMM, tr|A0A291TVJ7|A0A291TVJ7_9GAMM	complete		1.35	0.432959	NO_SP	FALSE	FALSE
621	329	A0A291U273|A0A291U273	9.07	25	12	12	0.48	2.01995	26900000	337000	20000000	246000	61041	2-isopropylmalate synthase OS=Aeromonas sp. CA23 OX=2033032 GN=leuA PE=3 SV=1	K01649	M00432Â Leucine biosynthesis, 2-oxoisovalerate => 2-oxoisocaproateÂ (4)Â Â (complete 3/3)	tr|A0A291U273|A0A291U273_9GAMM, tr|A0A291TVJ7|A0A291TVJ7_9GAMM	complete		0.02	-5.64386	NO_SP	FALSE	FALSE
679	516	A0A291TVN7|A0A291TVN7	22.47	38	5	5	0.555556	2.59381	192000000	50200000	170000000	47700000	22042	3-isopropylmalate dehydratase small subunit OS=Aeromonas sp. CA23 OX=2033032 GN=leuD PE=3 SV=1	K01704	M00432Â Leucine biosynthesis, 2-oxoisovalerate => 2-oxoisocaproateÂ (4)Â Â (complete 3/3)	tr|A0A291TVN7|A0A291TVN7_9GAMM	complete		0.28	-1.8365	NO_SP	FALSE	FALSE
1154	2474	A0A291U1I8|A0A291U1I8	14.59	15	3	3	0.25	0.778279	505000000	180000000	505000000	179000000	37359	Ubiquinol oxidase subunit 2 OS=Aeromonas sp. CA23 OX=2033032 GN=CK910_12310 PE=3 SV=1	K02297	M00417Â Cytochrome o ubiquinol oxidaseÂ (4)Â Â (complete 1/1)	tr|A0A291U1I8|A0A291U1I8_9GAMM	complete		0.36	-1.47393	LIPO	FALSE	FALSE
1314	2271	A0A291U1Y3|A0A291U1Y3	13.27	6	3	3	0.25	0.778279	2370000	583000	2370000	583000	73663	Cytochrome bo(3) ubiquinol oxidase subunit 1 OS=Aeromonas sp. CA23 OX=2033032 GN=CK910_12315 PE=3 SV=1	K02298	M00417Â Cytochrome o ubiquinol oxidaseÂ (4)Â Â (complete 1/1)	tr|A0A291U1Y3|A0A291U1Y3_9GAMM	complete		0.25	-2	NO_SP	FALSE	FALSE
347	220	A0A291TYF8|A0A291TYF8	17.13	54	15	15	1	9	219000000	56000000	138000000	25300000	33340	Methylenetetrahydrofolate reductase OS=Aeromonas sp. CA23 OX=2033032 GN=metF PE=3 SV=1	K00297	M00377Â Reductive acetyl-CoA pathway (Wood-Ljungdahl pathway)Â (4)Â Â (incomplete 3/7)	tr|A0A291TYF8|A0A291TYF8_9GAMM	complete		0.18	-2.47393	NO_SP	FALSE	FALSE
461	248	A0A291U2V6|A0A291U2V6	2.39	54	10	10	1.11111	11.9155	83000000	22800000	50500000	15500000	30781	Bifunctional protein FolD OS=Aeromonas sp. CA23 OX=2033032 GN=folD PE=3 SV=1	K01491	M00377Â Reductive acetyl-CoA pathway (Wood-Ljungdahl pathway)Â (4)Â Â (incomplete 3/7)	tr|A0A291U2V6|A0A291U2V6_9GAMM	complete		0.31	-1.68966	NO_SP	FALSE	FALSE
87	37	A0A291U326|A0A291U326	5.02	56	30	30	1.15385	13.251	300000000	452000000	143000000	199000000	64370	Succinate dehydrogenase flavoprotein subunit OS=Aeromonas sp. CA23 OX=2033032 GN=CK910_15510 PE=3 SV=1	K00239	M00376Â 3-Hydroxypropionate bi-cycleÂ (9)Â Â (incomplete 4/13)	tr|A0A291U326|A0A291U326_9GAMM	complete		1.39	0.475085	NO_SP	FALSE	FALSE
220	197	A0A291U6Y6|A0A291U6Y6	0.93	55	13	13	0.866667	6.35642	93200000	98200000	57300000	55700000	35263	Acetyl-coenzyme A carboxylase carboxyl transferase subunit alpha OS=Aeromonas sp. CA23 OX=2033032 GN=accA PE=3 SV=1	K01962	M00376Â 3-Hydroxypropionate bi-cycleÂ (9)Â Â (incomplete 4/13)	tr|A0A291U6Y6|A0A291U6Y6_9GAMM	complete		0.97	-0.0439433	NO_SP	FALSE	FALSE
293	428	A0A291U071|A0A291U071	2.33	27	15	15	0.681818	3.80638	71000000	98000000	57500000	74300000	48962	Biotin carboxylase OS=Aeromonas sp. CA23 OX=2033032 GN=accC PE=4 SV=1	K01961	M00376Â 3-Hydroxypropionate bi-cycleÂ (9)Â Â (incomplete 4/13)	tr|A0A291U071|A0A291U071_9GAMM	complete		1.29	0.367371	NO_SP	FALSE	FALSE
495	289	A0A291U327|A0A291U327	0.09	59	10	10	0.769231	4.87802	169000000	159000000	131000000	122000000	26678	Succinate dehydrogenase iron-sulfur subunit OS=Aeromonas sp. CA23 OX=2033032 GN=sdhB PE=3 SV=1	K00240	M00376Â 3-Hydroxypropionate bi-cycleÂ (9)Â Â (incomplete 4/13)	tr|A0A291U327|A0A291U327_9GAMM	complete		0.93	-0.104697	NO_SP	FALSE	FALSE
673	2103	A0A291U0I0|A0A291U0I0	3.17	61	3	3	0.75	4.62341	391000000	330000000	316000000	257000000	16122	Biotin carboxyl carrier protein of acetyl-CoA carboxylase OS=Aeromonas sp. CA23 OX=2033032 GN=accB PE=4 SV=1	K02160	M00376Â 3-Hydroxypropionate bi-cycleÂ (9)Â Â (incomplete 4/13)	tr|A0A291U0I0|A0A291U0I0_9GAMM	complete		0.81	-0.304006	NO_SP	FALSE	FALSE
746	672	A0A291U2S2|A0A291U2S2	2.51	35	9	9	0.6	2.98107	27100000	34100000	20900000	25800000	31761	Acetyl-coenzyme A carboxylase carboxyl transferase subunit beta OS=Aeromonas sp. CA23 OX=2033032 GN=accD PE=3 SV=1	K01963	M00376Â 3-Hydroxypropionate bi-cycleÂ (9)Â Â (incomplete 4/13)	tr|A0A291U2S2|A0A291U2S2_9GAMM	complete		1.24	0.31034	NO_SP	FALSE	FALSE
940	818	A0A291U003|A0A291U003	5.81	7	3	3	0.1875	0.539927	9230000	14400000	7660000	13900000	49322	Fumarate hydratase class II OS=Aeromonas sp. CA23 OX=2033032 GN=fumC PE=3 SV=1	K01679	M00376Â 3-Hydroxypropionate bi-cycleÂ (9)Â Â (incomplete 4/13)	tr|A0A291U003|A0A291U003_9GAMM	complete		1.81	0.85599	NO_SP	FALSE	FALSE
55	54	A0A291TW78|A0A291TW78	3.29	85	26	26	2	99	4100000000	5180000000	2440000000	3090000000	32085	Malate dehydrogenase OS=Aeromonas sp. CA23 OX=2033032 GN=mdh PE=3 SV=1	K00024	M00374Â Dicarboxylate-hydroxybutyrate cycleÂ (9)Â Â (incomplete 6/13)	tr|A0A291TW78|A0A291TW78_9GAMM	complete	GH4.hmm	1.27	0.344828	NO_SP	FALSE	FALSE
55	54	A0A291TW78|A0A291TW78	3.29	85	26	26	2	99	4100000000	5180000000	2440000000	3090000000	32085	Malate dehydrogenase OS=Aeromonas sp. CA23 OX=2033032 GN=mdh PE=3 SV=1	K00024	M00374Â Dicarboxylate-hydroxybutyrate cycleÂ (9)Â Â (incomplete 6/13)	tr|A0A291TW78|A0A291TW78_9GAMM	complete	GH4.hmm	1.27	0.344828	NO_SP	FALSE	FALSE
55	54	A0A291TW78|A0A291TW78	3.29	85	26	26	2	99	4100000000	5180000000	2440000000	3090000000	32085	Malate dehydrogenase OS=Aeromonas sp. CA23 OX=2033032 GN=mdh PE=3 SV=1	K00024	M00374Â Dicarboxylate-hydroxybutyrate cycleÂ (9)Â Â (incomplete 6/13)	tr|A0A291TW78|A0A291TW78_9GAMM	complete	GH4.hmm	1.27	0.344828	NO_SP	FALSE	FALSE
70	47	A0A291TWH0|A0A291TWH0	1.08	42	33	33	0.673469	3.71487	219000000	93500000	128000000	52400000	99003	Phosphoenolpyruvate carboxylase OS=Aeromonas sp. CA23 OX=2033032 GN=ppc PE=3 SV=1	K01595	M00374Â Dicarboxylate-hydroxybutyrate cycleÂ (9)Â Â (incomplete 6/13)	tr|A0A291TWH0|A0A291TWH0_9GAMM	complete		0.41	-1.2863	NO_SP	FALSE	FALSE
87	37	A0A291U326|A0A291U326	5.02	56	30	30	1.15385	13.251	300000000	452000000	143000000	199000000	64370	Succinate dehydrogenase flavoprotein subunit OS=Aeromonas sp. CA23 OX=2033032 GN=CK910_15510 PE=3 SV=1	K00239	M00374Â Dicarboxylate-hydroxybutyrate cycleÂ (9)Â Â (incomplete 6/13)	tr|A0A291U326|A0A291U326_9GAMM	complete		1.39	0.475085	NO_SP	FALSE	FALSE
137	171	A0A291U344|A0A291U344	8.9	73	19	19	1.72727	52.367	826000000	2190000000	562000000	1330000000	29830	Succinate--CoA ligase [ADP-forming] subunit alpha OS=Aeromonas sp. CA23 OX=2033032 GN=sucD PE=3 SV=1	K01902	M00374Â Dicarboxylate-hydroxybutyrate cycleÂ (9)Â Â (incomplete 6/13)	tr|A0A291U344|A0A291U344_9GAMM	complete		2.37	1.24489	NO_SP	FALSE	FALSE
179	109	A0A291U2D1|A0A291U2D1	7.44	59	19	19	1.05556	10.3646	134000000	289000000	77700000	175000000	41434	Succinate--CoA ligase [ADP-forming] subunit beta OS=Aeromonas sp. CA23 OX=2033032 GN=sucC PE=3 SV=1	K01903	M00374Â Dicarboxylate-hydroxybutyrate cycleÂ (9)Â Â (incomplete 6/13)	tr|A0A291U2D1|A0A291U2D1_9GAMM	complete		2.26	1.17632	NO_SP	FALSE	FALSE
302	141	A0A291U7P9|A0A291U7P9	1.64	21	17	17	0.566667	2.68695	76900000	90700000	46400000	54000000	86031	Phosphoenolpyruvate synthase OS=Aeromonas sp. CA23 OX=2033032 GN=CK910_13760 PE=3 SV=1	K01007	M00374Â Dicarboxylate-hydroxybutyrate cycleÂ (9)Â Â (incomplete 6/13)	tr|A0A291U7P9|A0A291U7P9_9GAMM	complete		1.16	0.214125	NO_SP	FALSE	FALSE
495	289	A0A291U327|A0A291U327	0.09	59	10	10	0.769231	4.87802	169000000	159000000	131000000	122000000	26678	Succinate dehydrogenase iron-sulfur subunit OS=Aeromonas sp. CA23 OX=2033032 GN=sdhB PE=3 SV=1	K00240	M00374Â Dicarboxylate-hydroxybutyrate cycleÂ (9)Â Â (incomplete 6/13)	tr|A0A291U327|A0A291U327_9GAMM	complete		0.93	-0.104697	NO_SP	FALSE	FALSE
119	523	A0A291U139|A0A291U139	5.01	60	26	26	1.36842	22.3572	2460000000	128000000	1510000000	57400000	41595	S-adenosylmethionine synthase OS=Aeromonas sp. CA23 OX=2033032 GN=metK PE=3 SV=1	K00789	M00368Â Ethylene biosynthesis, methionine => ethyleneÂ (1)Â Â (2 blocks missing 1/3)	tr|A0A291U139|A0A291U139_9GAMM	incomplete		0.04	-4.64386	NO_SP	FALSE	FALSE
1572	1509	A0A291U0K3|A0A291U0K3	7.76	8	2	2	0.222222	0.668101	12600000	3270000	11300000	3270000	31881	(2E 6E)-farnesyl diphosphate synthase OS=Aeromonas sp. CA23 OX=2033032 GN=CK910_10450 PE=3 SV=1	K00795	M00364Â C10-C20 isoprenoid biosynthesis, bacteriaÂ (1)Â Â (1 block missing 1/2)	tr|A0A291U0K3|A0A291U0K3_9GAMM	incomplete		0.29	-1.78588	NO_SP	FALSE	FALSE
97	48	A0A291U0K7|A0A291U0K7	11.25	59	35	35	1.34615	21.1898	442000000	2920000000	307000000	1910000000	71225	Acetyl-coenzyme A synthetase OS=Aeromonas sp. CA23 OX=2033032 GN=acs PE=3 SV=1	K01895	M00357Â Methanogenesis, acetate => methaneÂ (2)Â Â (incomplete 1/5)	tr|A0A291U0K7|A0A291U0K7_9GAMM	complete		6.2	2.63227	NO_SP	FALSE	FALSE
534	326	A0A291TVB4|A0A291TVB4	19.73	41	12	12	0.631579	3.28133	83400000	13400000	44400000	11400000	43095	Acetate kinase OS=Aeromonas sp. CA23 OX=2033032 GN=ackA PE=3 SV=1	K00925	M00357Â Methanogenesis, acetate => methaneÂ (2)Â Â (incomplete 1/5)	tr|A0A291TVB4|A0A291TVB4_9GAMM, tr|A0A291TZM4|A0A291TZM4_9GAMM	complete		0.26	-1.94342	NO_SP	FALSE	FALSE
763	527	A0A291TZM4|A0A291TZM4	8.86	27	8	8	0.470588	1.95521	27200000	4320000	23600000	4270000	42453	Acetate kinase OS=Aeromonas sp. CA23 OX=2033032 GN=ackA PE=3 SV=1	K00925	M00357Â Methanogenesis, acetate => methaneÂ (2)Â Â (incomplete 1/5)	tr|A0A291TVB4|A0A291TVB4_9GAMM, tr|A0A291TZM4|A0A291TZM4_9GAMM	complete		0.18	-2.47393	NO_SP	FALSE	FALSE
9	5	A0A291TW56|A0A291TW56	11.52	88	37	37	2.3125	204.353	6690000000	1850000000	3660000000	1080000000	45692	Enolase OS=Aeromonas sp. CA23 OX=2033032 GN=eno PE=3 SV=1	K01689	M00346Â Formaldehyde assimilation, serine pathwayÂ (5)Â Â (incomplete 5/9)	tr|A0A291TW56|A0A291TW56_9GAMM	complete		0.3	-1.73697	NO_SP	FALSE	FALSE
51	33	A0A291U0L3|A0A291U0L3	6.11	82	29	29	1.52632	32.5982	1980000000	682000000	786000000	239000000	45482	Serine hydroxymethyltransferase OS=Aeromonas sp. CA23 OX=2033032 GN=glyA PE=3 SV=1	K00600	M00346Â Formaldehyde assimilation, serine pathwayÂ (5)Â Â (incomplete 5/9)	tr|A0A291U0L3|A0A291U0L3_9GAMM	complete		0.3	-1.73697	NO_SP	FALSE	FALSE
55	54	A0A291TW78|A0A291TW78	3.29	85	26	26	2	99	4100000000	5180000000	2440000000	3090000000	32085	Malate dehydrogenase OS=Aeromonas sp. CA23 OX=2033032 GN=mdh PE=3 SV=1	K00024	M00346Â Formaldehyde assimilation, serine pathwayÂ (5)Â Â (incomplete 5/9)	tr|A0A291TW78|A0A291TW78_9GAMM	complete	GH4.hmm	1.27	0.344828	NO_SP	FALSE	FALSE
55	54	A0A291TW78|A0A291TW78	3.29	85	26	26	2	99	4100000000	5180000000	2440000000	3090000000	32085	Malate dehydrogenase OS=Aeromonas sp. CA23 OX=2033032 GN=mdh PE=3 SV=1	K00024	M00346Â Formaldehyde assimilation, serine pathwayÂ (5)Â Â (incomplete 5/9)	tr|A0A291TW78|A0A291TW78_9GAMM	complete	GH4.hmm	1.27	0.344828	NO_SP	FALSE	FALSE
55	54	A0A291TW78|A0A291TW78	3.29	85	26	26	2	99	4100000000	5180000000	2440000000	3090000000	32085	Malate dehydrogenase OS=Aeromonas sp. CA23 OX=2033032 GN=mdh PE=3 SV=1	K00024	M00346Â Formaldehyde assimilation, serine pathwayÂ (5)Â Â (incomplete 5/9)	tr|A0A291TW78|A0A291TW78_9GAMM	complete	GH4.hmm	1.27	0.344828	NO_SP	FALSE	FALSE
70	47	A0A291TWH0|A0A291TWH0	1.08	42	33	33	0.673469	3.71487	219000000	93500000	128000000	52400000	99003	Phosphoenolpyruvate carboxylase OS=Aeromonas sp. CA23 OX=2033032 GN=ppc PE=3 SV=1	K01595	M00346Â Formaldehyde assimilation, serine pathwayÂ (5)Â Â (incomplete 5/9)	tr|A0A291TWH0|A0A291TWH0_9GAMM	complete		0.41	-1.2863	NO_SP	FALSE	FALSE
47	59	A0A291TVE9|A0A291TVE9	13.58	77	39	39	2.6	397.107	9140000000	1450000000	5840000000	1050000000	38947	Fructose-bisphosphate aldolase OS=Aeromonas sp. CA23 OX=2033032 GN=CK910_01070 PE=3 SV=1	K01624	M00345Â Formaldehyde assimilation, ribulose monophosphate pathwayÂ (2)Â Â (1 block missing 2/3)	tr|A0A291TVE9|A0A291TVE9_9GAMM	incomplete		0.18	-2.47393	NO_SP	FALSE	FALSE
223	151	A0A291U3D1|A0A291U3D1	1.52	47	14	14	0.933333	7.57696	469000000	274000000	311000000	177000000	34827	ATP-dependent 6-phosphofructokinase OS=Aeromonas sp. CA23 OX=2033032 GN=pfkA PE=3 SV=1	K00850	M00345Â Formaldehyde assimilation, ribulose monophosphate pathwayÂ (2)Â Â (1 block missing 2/3)	tr|A0A291U3D1|A0A291U3D1_9GAMM	incomplete		0.57	-0.810966	NO_SP	FALSE	FALSE
47	59	A0A291TVE9|A0A291TVE9	13.58	77	39	39	2.6	397.107	9140000000	1450000000	5840000000	1050000000	38947	Fructose-bisphosphate aldolase OS=Aeromonas sp. CA23 OX=2033032 GN=CK910_01070 PE=3 SV=1	K01624	M00344Â Formaldehyde assimilation, xylulose monophosphate pathwayÂ (2)Â Â (2 blocks missing 2/4)	tr|A0A291TVE9|A0A291TVE9_9GAMM	incomplete		0.18	-2.47393	NO_SP	FALSE	FALSE
418	263	A0A291U3V8|A0A291U3V8	13.84	50	14	14	1	9	141000000	39300000	103000000	28300000	37961	Fructose-1 6-bisphosphatase class 1 OS=Aeromonas sp. CA23 OX=2033032 GN=fbp PE=3 SV=1	K03841	M00344Â Formaldehyde assimilation, xylulose monophosphate pathwayÂ (2)Â Â (2 blocks missing 2/4)	tr|A0A291U3V8|A0A291U3V8_9GAMM	incomplete		0.27	-1.88897	NO_SP	FALSE	FALSE
2	40	A0A291TZV8|A0A291TZV8	26.74	98	55	55	3.66667	4640.59	23200000000	5190000000	7890000000	1790000000	35049	Glyceraldehyde-3-phosphate dehydrogenase OS=Aeromonas sp. CA23 OX=2033032 GN=gap PE=3 SV=1	K00134	M00308Â Semi-phosphorylative Entner-Doudoroff pathway, gluconate => glycerate-3PÂ (3)Â Â (2 blocks missing 2/4)	tr|A0A291U0G4|A0A291U0G4_9GAMM, tr|A0A291TZV8|A0A291TZV8_9GAMM	incomplete		0.23	-2.12029	NO_SP	FALSE	CORRECT
68	15	A0A291TW01|A0A291TW01	12.91	89	35	35	1.84211	68.5193	2560000000	627000000	1270000000	326000000	40465	Phosphoglycerate kinase OS=Aeromonas sp. CA23 OX=2033032 GN=pgk PE=3 SV=1	K00927	M00308Â Semi-phosphorylative Entner-Doudoroff pathway, gluconate => glycerate-3PÂ (3)Â Â (2 blocks missing 2/4)	tr|A0A291TW01|A0A291TW01_9GAMM	incomplete		0.26	-1.94342	NO_SP	FALSE	FALSE
866	593	A0A291U0G4|A0A291U0G4	0.77	20	5	5	0.384615	1.42446	15100000	8980000	11700000	8470000	51830	Glyceraldehyde-3-phosphate dehydrogenase OS=Aeromonas sp. CA23 OX=2033032 GN=CK910_10235 PE=3 SV=1	K00134	M00308Â Semi-phosphorylative Entner-Doudoroff pathway, gluconate => glycerate-3PÂ (3)Â Â (2 blocks missing 2/4)	tr|A0A291U0G4|A0A291U0G4_9GAMM, tr|A0A291TZV8|A0A291TZV8_9GAMM	incomplete		0.72	-0.473931	NO_SP	FALSE	FALSE
876	781	A0A291TWZ9|A0A291TWZ9	12.51	48	5	5	0.555556	2.59381	48100000	16900000	45700000	16300000	21961	2-dehydro-3-deoxy-phosphogluconate aldolase OS=Aeromonas sp. CA23 OX=2033032 GN=CK910_03615 PE=3 SV=1	K01625	M00308Â Semi-phosphorylative Entner-Doudoroff pathway, gluconate => glycerate-3PÂ (3)Â Â (2 blocks missing 2/4)	tr|A0A291TWZ9|A0A291TWZ9_9GAMM	incomplete		0.36	-1.47393	NO_SP	FALSE	FALSE
39	39	A0A291TZD1|A0A291TZD1	2.52	67	33	33	1.65	43.6684	1440000000	628000000	709000000	289000000	50367	Dihydrolipoyl dehydrogenase OS=Aeromonas sp. CA23 OX=2033032 GN=lpdA PE=3 SV=1	K00382	M00307Â Pyruvate oxidation, pyruvate => acetyl-CoAÂ (4)Â Â (complete 1/1)	tr|A0A291TZD1|A0A291TZD1_9GAMM	complete		0.41	-1.2863	NO_SP	FALSE	FALSE
105	136	A0A291TYJ3|A0A291TYJ3	2.94	33	25	25	0.609756	3.07152	205000000	160000000	88400000	55800000	98655	Pyruvate dehydrogenase E1 component OS=Aeromonas sp. CA23 OX=2033032 GN=aceE PE=4 SV=1	K00163	M00307Â Pyruvate oxidation, pyruvate => acetyl-CoAÂ (4)Â Â (complete 1/1)	tr|A0A291TYJ3|A0A291TYJ3_9GAMM	complete		0.63	-0.666576	NO_SP	FALSE	FALSE
889	546	A0A291TZ51|A0A291TZ51	1.25	9	6	6	0.285714	0.930698	110000000	90300000	104000000	85300000	64872	Acetyltransferase component of pyruvate dehydrogenase complex OS=Aeromonas sp. CA23 OX=2033032 GN=aceF PE=3 SV=1	K00627	M00307Â Pyruvate oxidation, pyruvate => acetyl-CoAÂ (4)Â Â (complete 1/1)	tr|A0A291TZ51|A0A291TZ51_9GAMM	complete		0.82	-0.286304	NO_SP	FALSE	FALSE
106	654	A0A291U0F6|A0A291U0F6	4.52	59	32	32	0.969697	8.32603	705000000	29700000	411000000	24200000	63092	Sulfite reductase [NADPH] hemoprotein beta-component OS=Aeromonas sp. CA23 OX=2033032 GN=cysI PE=3 SV=1	K00381	M00176Â Assimilatory sulfate reduction, sulfate => H2SÂ (6)Â Â (complete 3/3)	tr|A0A291U0F6|A0A291U0F6_9GAMM	complete		0.06	-4.05889	NO_SP	FALSE	FALSE
342	328	A0A291U052|A0A291U052	9.57	28	14	14	0.777778	4.99484	104000000	21600000	63700000	9990000	64944	Sulfite reductase [NADPH] flavoprotein alpha-component OS=Aeromonas sp. CA23 OX=2033032 GN=CK910_10195 PE=4 SV=1	K00380	M00176Â Assimilatory sulfate reduction, sulfate => H2SÂ (6)Â Â (complete 3/3)	tr|A0A291U052|A0A291U052_9GAMM	complete		0.16	-2.64386	NO_SP	FALSE	FALSE
587	454	A0A291TZK3|A0A291TZK3	15.78	34	10	10	0.833333	5.81292	44700000	11700000	24800000	7310000	35052	Sulfate adenylyltransferase subunit 2 OS=Aeromonas sp. CA23 OX=2033032 GN=cysD PE=3 SV=1	K00957	M00176Â Assimilatory sulfate reduction, sulfate => H2SÂ (6)Â Â (complete 3/3)	tr|A0A291TZK3|A0A291TZK3_9GAMM	complete		0.3	-1.73697	NO_SP	FALSE	FALSE
721	809	A0A291U0F4|A0A291U0F4	26.81	35	8	8	0.5	2.16228	129000000	26400000	107000000	22900000	30666	Phosphoadenosine 5'-phosphosulfate reductase OS=Aeromonas sp. CA23 OX=2033032 GN=cysH PE=3 SV=1	K00390	M00176Â Assimilatory sulfate reduction, sulfate => H2SÂ (6)Â Â (complete 3/3)	tr|A0A291U0F4|A0A291U0F4_9GAMM	complete		0.21	-2.25154	NO_SP	FALSE	CORRECT
1062	850	A0A291TZZ4|A0A291TZZ4	12.27	27	5	5	0.714286	4.17947	241000000	83500000	184000000	64400000	21519	Adenylyl-sulfate kinase OS=Aeromonas sp. CA23 OX=2033032 GN=cysC PE=3 SV=1	K00860	M00176Â Assimilatory sulfate reduction, sulfate => H2SÂ (6)Â Â (complete 3/3)	tr|A0A291TZZ4|A0A291TZZ4_9GAMM	complete		0.35	-1.51457	NO_SP	FALSE	FALSE
1147	1149	A0A291TZI0|A0A291TZI0	0	5	2	2	0.0833333	0.211528	1590000	979000	1590000	979000	52667	Sulfate adenylyltransferase subunit 1 OS=Aeromonas sp. CA23 OX=2033032 GN=cysN PE=3 SV=1	K00956	M00176Â Assimilatory sulfate reduction, sulfate => H2SÂ (6)Â Â (complete 3/3)	tr|A0A291TZI0|A0A291TZI0_9GAMM	complete		0.62	-0.68966	NO_SP	FALSE	FALSE
15	12	A0A291TYV0|A0A291TYV0	2.92	68	55	55	1.375	22.7137	839000000	1160000000	373000000	503000000	93074	Aconitate hydratase B OS=Aeromonas sp. CA23 OX=2033032 GN=acnB PE=3 SV=1	K01682	M00173Â Reductive citrate cycle (Arnon-Buchanan cycle)Â (18)Â Â (2 blocks missing 8/10)	tr|A0A291TYV0|A0A291TYV0_9GAMM	incomplete		1.35	0.432959	NO_SP	FALSE	FALSE
41	23	A0A291U5U2|A0A291U5U2	1.73	76	37	37	1.7619	56.7969	1970000000	2280000000	712000000	753000000	45633	Isocitrate dehydrogenase [NADP] OS=Aeromonas sp. CA23 OX=2033032 GN=CK910_20860 PE=4 SV=1	K00031	M00173Â Reductive citrate cycle (Arnon-Buchanan cycle)Â (18)Â Â (2 blocks missing 8/10)	tr|A0A291U5U2|A0A291U5U2_9GAMM	incomplete		1.06	0.0840643	NO_SP	FALSE	FALSE
55	54	A0A291TW78|A0A291TW78	3.29	85	26	26	2	99	4100000000	5180000000	2440000000	3090000000	32085	Malate dehydrogenase OS=Aeromonas sp. CA23 OX=2033032 GN=mdh PE=3 SV=1	K00024	M00173Â Reductive citrate cycle (Arnon-Buchanan cycle)Â (18)Â Â (2 blocks missing 8/10)	tr|A0A291TW78|A0A291TW78_9GAMM	incomplete	GH4.hmm	1.27	0.344828	NO_SP	FALSE	FALSE
55	54	A0A291TW78|A0A291TW78	3.29	85	26	26	2	99	4100000000	5180000000	2440000000	3090000000	32085	Malate dehydrogenase OS=Aeromonas sp. CA23 OX=2033032 GN=mdh PE=3 SV=1	K00024	M00173Â Reductive citrate cycle (Arnon-Buchanan cycle)Â (18)Â Â (2 blocks missing 8/10)	tr|A0A291TW78|A0A291TW78_9GAMM	incomplete	GH4.hmm	1.27	0.344828	NO_SP	FALSE	FALSE
55	54	A0A291TW78|A0A291TW78	3.29	85	26	26	2	99	4100000000	5180000000	2440000000	3090000000	32085	Malate dehydrogenase OS=Aeromonas sp. CA23 OX=2033032 GN=mdh PE=3 SV=1	K00024	M00173Â Reductive citrate cycle (Arnon-Buchanan cycle)Â (18)Â Â (2 blocks missing 8/10)	tr|A0A291TW78|A0A291TW78_9GAMM	incomplete	GH4.hmm	1.27	0.344828	NO_SP	FALSE	FALSE
70	47	A0A291TWH0|A0A291TWH0	1.08	42	33	33	0.673469	3.71487	219000000	93500000	128000000	52400000	99003	Phosphoenolpyruvate carboxylase OS=Aeromonas sp. CA23 OX=2033032 GN=ppc PE=3 SV=1	K01595	M00173Â Reductive citrate cycle (Arnon-Buchanan cycle)Â (18)Â Â (2 blocks missing 8/10)	tr|A0A291TWH0|A0A291TWH0_9GAMM	incomplete		0.41	-1.2863	NO_SP	FALSE	FALSE
74	46	A0A291U0W1|A0A291U0W1	0.26	48	24	24	0.827586	5.72336	577000000	425000000	251000000	197000000	65305	Fumarate reductase flavoprotein subunit OS=Aeromonas sp. CA23 OX=2033032 GN=CK910_10975 PE=3 SV=1	K00244	M00173Â Reductive citrate cycle (Arnon-Buchanan cycle)Â (18)Â Â (2 blocks missing 8/10)	tr|A0A291U0W1|A0A291U0W1_9GAMM	incomplete		0.78	-0.358454	NO_SP	FALSE	FALSE
87	37	A0A291U326|A0A291U326	5.02	56	30	30	1.15385	13.251	300000000	452000000	143000000	199000000	64370	Succinate dehydrogenase flavoprotein subunit OS=Aeromonas sp. CA23 OX=2033032 GN=CK910_15510 PE=3 SV=1	K00239	M00173Â Reductive citrate cycle (Arnon-Buchanan cycle)Â (18)Â Â (2 blocks missing 8/10)	tr|A0A291U326|A0A291U326_9GAMM	incomplete		1.39	0.475085	NO_SP	FALSE	FALSE
137	171	A0A291U344|A0A291U344	8.9	73	19	19	1.72727	52.367	826000000	2190000000	562000000	1330000000	29830	Succinate--CoA ligase [ADP-forming] subunit alpha OS=Aeromonas sp. CA23 OX=2033032 GN=sucD PE=3 SV=1	K01902	M00173Â Reductive citrate cycle (Arnon-Buchanan cycle)Â (18)Â Â (2 blocks missing 8/10)	tr|A0A291U344|A0A291U344_9GAMM	incomplete		2.37	1.24489	NO_SP	FALSE	FALSE
169	126	A0A291U0E3|A0A291U0E3	1.7	91	19	19	1.35714	21.7585	823000000	295000000	587000000	230000000	27688	Fumarate reductase iron-sulfur subunit OS=Aeromonas sp. CA23 OX=2033032 GN=CK910_10970 PE=3 SV=1	K00245	M00173Â Reductive citrate cycle (Arnon-Buchanan cycle)Â (18)Â Â (2 blocks missing 8/10)	tr|A0A291U0E3|A0A291U0E3_9GAMM	incomplete		0.39	-1.35845	NO_SP	FALSE	FALSE
171	73	A0A291U389|A0A291U389	0.34	51	20	20	0.952381	7.96151	168000000	180000000	88500000	81400000	54430	Fumarate hydratase class I OS=Aeromonas sp. CA23 OX=2033032 GN=CK910_15890 PE=3 SV=1	K01676	M00173Â Reductive citrate cycle (Arnon-Buchanan cycle)Â (18)Â Â (2 blocks missing 8/10)	tr|A0A291U389|A0A291U389_9GAMM	incomplete		0.92	-0.120294	NO_SP	FALSE	FALSE
179	109	A0A291U2D1|A0A291U2D1	7.44	59	19	19	1.05556	10.3646	134000000	289000000	77700000	175000000	41434	Succinate--CoA ligase [ADP-forming] subunit beta OS=Aeromonas sp. CA23 OX=2033032 GN=sucC PE=3 SV=1	K01903	M00173Â Reductive citrate cycle (Arnon-Buchanan cycle)Â (18)Â Â (2 blocks missing 8/10)	tr|A0A291U2D1|A0A291U2D1_9GAMM	incomplete		2.26	1.17632	NO_SP	FALSE	FALSE
302	141	A0A291U7P9|A0A291U7P9	1.64	21	17	17	0.566667	2.68695	76900000	90700000	46400000	54000000	86031	Phosphoenolpyruvate synthase OS=Aeromonas sp. CA23 OX=2033032 GN=CK910_13760 PE=3 SV=1	K01007	M00173Â Reductive citrate cycle (Arnon-Buchanan cycle)Â (18)Â Â (2 blocks missing 8/10)	tr|A0A291U7P9|A0A291U7P9_9GAMM	incomplete		1.16	0.214125	NO_SP	FALSE	FALSE
495	289	A0A291U327|A0A291U327	0.09	59	10	10	0.769231	4.87802	169000000	159000000	131000000	122000000	26678	Succinate dehydrogenase iron-sulfur subunit OS=Aeromonas sp. CA23 OX=2033032 GN=sdhB PE=3 SV=1	K00240	M00173Â Reductive citrate cycle (Arnon-Buchanan cycle)Â (18)Â Â (2 blocks missing 8/10)	tr|A0A291U327|A0A291U327_9GAMM	incomplete		0.93	-0.104697	NO_SP	FALSE	FALSE
940	818	A0A291U003|A0A291U003	5.81	7	3	3	0.1875	0.539927	9230000	14400000	7660000	13900000	49322	Fumarate hydratase class II OS=Aeromonas sp. CA23 OX=2033032 GN=fumC PE=3 SV=1	K01679	M00173Â Reductive citrate cycle (Arnon-Buchanan cycle)Â (18)Â Â (2 blocks missing 8/10)	tr|A0A291U003|A0A291U003_9GAMM	incomplete		1.81	0.85599	NO_SP	FALSE	FALSE
1362	2138	A0A291U0G1|A0A291U0G1	13.47	14	2	2	0.5	2.16228	31900000	18700000	28400000	16300000	15058	Fumarate reductase subunit C OS=Aeromonas sp. CA23 OX=2033032 GN=frdC PE=3 SV=1	K00246	M00173Â Reductive citrate cycle (Arnon-Buchanan cycle)Â (18)Â Â (2 blocks missing 8/10)	tr|A0A291U0G1|A0A291U0G1_9GAMM	incomplete		0.58	-0.785875	NO_SP	FALSE	FALSE
70	47	A0A291TWH0|A0A291TWH0	1.08	42	33	33	0.673469	3.71487	219000000	93500000	128000000	52400000	99003	Phosphoenolpyruvate carboxylase OS=Aeromonas sp. CA23 OX=2033032 GN=ppc PE=3 SV=1	K01595	M00172Â C4-dicarboxylic acid cycle, NADP - malic enzyme typeÂ (2)Â Â (2 blocks missing 2/4)	tr|A0A291TWH0|A0A291TWH0_9GAMM	incomplete		0.41	-1.2863	NO_SP	FALSE	FALSE
70	47	A0A291TWH0|A0A291TWH0	1.08	42	33	33	0.673469	3.71487	219000000	93500000	128000000	52400000	99003	Phosphoenolpyruvate carboxylase OS=Aeromonas sp. CA23 OX=2033032 GN=ppc PE=3 SV=1	K01595	M00171Â C4-dicarboxylic acid cycle, NAD - malic enzyme typeÂ (1)Â Â (incomplete 1/7)	tr|A0A291TWH0|A0A291TWH0_9GAMM	complete		0.41	-1.2863	NO_SP	FALSE	FALSE
70	47	A0A291TWH0|A0A291TWH0	1.08	42	33	33	0.673469	3.71487	219000000	93500000	128000000	52400000	99003	Phosphoenolpyruvate carboxylase OS=Aeromonas sp. CA23 OX=2033032 GN=ppc PE=3 SV=1	K01595	M00170Â C4-dicarboxylic acid cycle, phosphoenolpyruvate carboxykinase typeÂ (2)Â Â (2 blocks missing 2/4)	tr|A0A291TWH0|A0A291TWH0_9GAMM	incomplete		0.41	-1.2863	NO_SP	FALSE	FALSE
1248	878	A0A291TW09|A0A291TW09	12.23	9	4	4	0.133333	0.359356	4410000	132000	4110000	132000	59765	Phosphoenolpyruvate carboxykinase (ATP) OS=Aeromonas sp. CA23 OX=2033032 GN=pckA PE=3 SV=1	K01610	M00170Â C4-dicarboxylic acid cycle, phosphoenolpyruvate carboxykinase typeÂ (2)Â Â (2 blocks missing 2/4)	tr|A0A291TW09|A0A291TW09_9GAMM	incomplete		0.03	-5.05889	NO_SP	FALSE	FALSE
55	54	A0A291TW78|A0A291TW78	3.29	85	26	26	2	99	4100000000	5180000000	2440000000	3090000000	32085	Malate dehydrogenase OS=Aeromonas sp. CA23 OX=2033032 GN=mdh PE=3 SV=1	K00024	M00168Â CAM (Crassulacean acid metabolism), darkÂ (2)Â Â (complete 2/2)	tr|A0A291TW78|A0A291TW78_9GAMM	complete	GH4.hmm	1.27	0.344828	NO_SP	FALSE	FALSE
55	54	A0A291TW78|A0A291TW78	3.29	85	26	26	2	99	4100000000	5180000000	2440000000	3090000000	32085	Malate dehydrogenase OS=Aeromonas sp. CA23 OX=2033032 GN=mdh PE=3 SV=1	K00024	M00168Â CAM (Crassulacean acid metabolism), darkÂ (2)Â Â (complete 2/2)	tr|A0A291TW78|A0A291TW78_9GAMM	complete	GH4.hmm	1.27	0.344828	NO_SP	FALSE	FALSE
55	54	A0A291TW78|A0A291TW78	3.29	85	26	26	2	99	4100000000	5180000000	2440000000	3090000000	32085	Malate dehydrogenase OS=Aeromonas sp. CA23 OX=2033032 GN=mdh PE=3 SV=1	K00024	M00168Â CAM (Crassulacean acid metabolism), darkÂ (2)Â Â (complete 2/2)	tr|A0A291TW78|A0A291TW78_9GAMM	complete	GH4.hmm	1.27	0.344828	NO_SP	FALSE	FALSE
70	47	A0A291TWH0|A0A291TWH0	1.08	42	33	33	0.673469	3.71487	219000000	93500000	128000000	52400000	99003	Phosphoenolpyruvate carboxylase OS=Aeromonas sp. CA23 OX=2033032 GN=ppc PE=3 SV=1	K01595	M00168Â CAM (Crassulacean acid metabolism), darkÂ (2)Â Â (complete 2/2)	tr|A0A291TWH0|A0A291TWH0_9GAMM	complete		0.41	-1.2863	NO_SP	FALSE	FALSE
47	59	A0A291TVE9|A0A291TVE9	13.58	77	39	39	2.6	397.107	9140000000	1450000000	5840000000	1050000000	38947	Fructose-bisphosphate aldolase OS=Aeromonas sp. CA23 OX=2033032 GN=CK910_01070 PE=3 SV=1	K01624	M00167Â Reductive pentose phosphate cycle, glyceraldehyde-3P => ribulose-5PÂ (5)Â Â (1 block missing 6/7)	tr|A0A291TVE9|A0A291TVE9_9GAMM	incomplete		0.18	-2.47393	NO_SP	FALSE	FALSE
63	13	A0A291U130|A0A291U130	0.42	68	33	33	1.32	19.893	475000000	200000000	177000000	80200000	71715	Transketolase OS=Aeromonas sp. CA23 OX=2033032 GN=tkt PE=3 SV=1	K00615	M00167Â Reductive pentose phosphate cycle, glyceraldehyde-3P => ribulose-5PÂ (5)Â Â (1 block missing 6/7)	tr|A0A291U130|A0A291U130_9GAMM	incomplete		0.45	-1.152	NO_SP	FALSE	FALSE
418	263	A0A291U3V8|A0A291U3V8	13.84	50	14	14	1	9	141000000	39300000	103000000	28300000	37961	Fructose-1 6-bisphosphatase class 1 OS=Aeromonas sp. CA23 OX=2033032 GN=fbp PE=3 SV=1	K03841	M00167Â Reductive pentose phosphate cycle, glyceraldehyde-3P => ribulose-5PÂ (5)Â Â (1 block missing 6/7)	tr|A0A291U3V8|A0A291U3V8_9GAMM	incomplete		0.27	-1.88897	NO_SP	FALSE	FALSE
456	502	A0A291U1X6|A0A291U1X6	2.27	53	10	10	0.909091	7.11131	68300000	67100000	35700000	34400000	22843	Ribose-5-phosphate isomerase A OS=Aeromonas sp. CA23 OX=2033032 GN=rpiA PE=3 SV=1	K01807	M00167Â Reductive pentose phosphate cycle, glyceraldehyde-3P => ribulose-5PÂ (5)Â Â (1 block missing 6/7)	tr|A0A291U1X6|A0A291U1X6_9GAMM	incomplete		0.96	-0.0588937	NO_SP	FALSE	FALSE
457	161	A0A291TWE8|A0A291TWE8	2.89	40	15	15	0.9375	7.65964	81300000	43800000	57800000	29800000	35793	Fructose-1 6-bisphosphatase OS=Aeromonas sp. CA23 OX=2033032 GN=glpX PE=3 SV=1	K02446	M00167Â Reductive pentose phosphate cycle, glyceraldehyde-3P => ribulose-5PÂ (5)Â Â (1 block missing 6/7)	tr|A0A291TWE8|A0A291TWE8_9GAMM	incomplete		0.52	-0.943416	NO_SP	FALSE	FALSE
2	40	A0A291TZV8|A0A291TZV8	26.74	98	55	55	3.66667	4640.59	23200000000	5190000000	7890000000	1790000000	35049	Glyceraldehyde-3-phosphate dehydrogenase OS=Aeromonas sp. CA23 OX=2033032 GN=gap PE=3 SV=1	K00134	M00166Â Reductive pentose phosphate cycle, ribulose-5P => glyceraldehyde-3PÂ (3)Â Â (1 block missing 3/4)	tr|A0A291U0G4|A0A291U0G4_9GAMM, tr|A0A291TZV8|A0A291TZV8_9GAMM	incomplete		0.23	-2.12029	NO_SP	FALSE	CORRECT
68	15	A0A291TW01|A0A291TW01	12.91	89	35	35	1.84211	68.5193	2560000000	627000000	1270000000	326000000	40465	Phosphoglycerate kinase OS=Aeromonas sp. CA23 OX=2033032 GN=pgk PE=3 SV=1	K00927	M00166Â Reductive pentose phosphate cycle, ribulose-5P => glyceraldehyde-3PÂ (3)Â Â (1 block missing 3/4)	tr|A0A291TW01|A0A291TW01_9GAMM	incomplete		0.26	-1.94342	NO_SP	FALSE	FALSE
305	570	A0A291TVG6|A0A291TVG6	3.98	55	13	13	1	9	186000000	85300000	154000000	64900000	32549	Phosphoribulokinase OS=Aeromonas sp. CA23 OX=2033032 GN=CK910_00040 PE=3 SV=1	K00855	M00166Â Reductive pentose phosphate cycle, ribulose-5P => glyceraldehyde-3PÂ (3)Â Â (1 block missing 3/4)	tr|A0A291TVG6|A0A291TVG6_9GAMM	incomplete		0.42	-1.25154	NO_SP	FALSE	FALSE
866	593	A0A291U0G4|A0A291U0G4	0.77	20	5	5	0.384615	1.42446	15100000	8980000	11700000	8470000	51830	Glyceraldehyde-3-phosphate dehydrogenase OS=Aeromonas sp. CA23 OX=2033032 GN=CK910_10235 PE=3 SV=1	K00134	M00166Â Reductive pentose phosphate cycle, ribulose-5P => glyceraldehyde-3PÂ (3)Â Â (1 block missing 3/4)	tr|A0A291U0G4|A0A291U0G4_9GAMM, tr|A0A291TZV8|A0A291TZV8_9GAMM	incomplete		0.72	-0.473931	NO_SP	FALSE	FALSE
2	40	A0A291TZV8|A0A291TZV8	26.74	98	55	55	3.66667	4640.59	23200000000	5190000000	7890000000	1790000000	35049	Glyceraldehyde-3-phosphate dehydrogenase OS=Aeromonas sp. CA23 OX=2033032 GN=gap PE=3 SV=1	K00134	M00165Â Reductive pentose phosphate cycle (Calvin cycle)Â (8)Â Â (2 blocks missing 9/11)	tr|A0A291U0G4|A0A291U0G4_9GAMM, tr|A0A291TZV8|A0A291TZV8_9GAMM	incomplete		0.23	-2.12029	NO_SP	FALSE	CORRECT
47	59	A0A291TVE9|A0A291TVE9	13.58	77	39	39	2.6	397.107	9140000000	1450000000	5840000000	1050000000	38947	Fructose-bisphosphate aldolase OS=Aeromonas sp. CA23 OX=2033032 GN=CK910_01070 PE=3 SV=1	K01624	M00165Â Reductive pentose phosphate cycle (Calvin cycle)Â (8)Â Â (2 blocks missing 9/11)	tr|A0A291TVE9|A0A291TVE9_9GAMM	incomplete		0.18	-2.47393	NO_SP	FALSE	FALSE
63	13	A0A291U130|A0A291U130	0.42	68	33	33	1.32	19.893	475000000	200000000	177000000	80200000	71715	Transketolase OS=Aeromonas sp. CA23 OX=2033032 GN=tkt PE=3 SV=1	K00615	M00165Â Reductive pentose phosphate cycle (Calvin cycle)Â (8)Â Â (2 blocks missing 9/11)	tr|A0A291U130|A0A291U130_9GAMM	incomplete		0.45	-1.152	NO_SP	FALSE	FALSE
68	15	A0A291TW01|A0A291TW01	12.91	89	35	35	1.84211	68.5193	2560000000	627000000	1270000000	326000000	40465	Phosphoglycerate kinase OS=Aeromonas sp. CA23 OX=2033032 GN=pgk PE=3 SV=1	K00927	M00165Â Reductive pentose phosphate cycle (Calvin cycle)Â (8)Â Â (2 blocks missing 9/11)	tr|A0A291TW01|A0A291TW01_9GAMM	incomplete		0.26	-1.94342	NO_SP	FALSE	FALSE
305	570	A0A291TVG6|A0A291TVG6	3.98	55	13	13	1	9	186000000	85300000	154000000	64900000	32549	Phosphoribulokinase OS=Aeromonas sp. CA23 OX=2033032 GN=CK910_00040 PE=3 SV=1	K00855	M00165Â Reductive pentose phosphate cycle (Calvin cycle)Â (8)Â Â (2 blocks missing 9/11)	tr|A0A291TVG6|A0A291TVG6_9GAMM	incomplete		0.42	-1.25154	NO_SP	FALSE	FALSE
418	263	A0A291U3V8|A0A291U3V8	13.84	50	14	14	1	9	141000000	39300000	103000000	28300000	37961	Fructose-1 6-bisphosphatase class 1 OS=Aeromonas sp. CA23 OX=2033032 GN=fbp PE=3 SV=1	K03841	M00165Â Reductive pentose phosphate cycle (Calvin cycle)Â (8)Â Â (2 blocks missing 9/11)	tr|A0A291U3V8|A0A291U3V8_9GAMM	incomplete		0.27	-1.88897	NO_SP	FALSE	FALSE
456	502	A0A291U1X6|A0A291U1X6	2.27	53	10	10	0.909091	7.11131	68300000	67100000	35700000	34400000	22843	Ribose-5-phosphate isomerase A OS=Aeromonas sp. CA23 OX=2033032 GN=rpiA PE=3 SV=1	K01807	M00165Â Reductive pentose phosphate cycle (Calvin cycle)Â (8)Â Â (2 blocks missing 9/11)	tr|A0A291U1X6|A0A291U1X6_9GAMM	incomplete		0.96	-0.0588937	NO_SP	FALSE	FALSE
457	161	A0A291TWE8|A0A291TWE8	2.89	40	15	15	0.9375	7.65964	81300000	43800000	57800000	29800000	35793	Fructose-1 6-bisphosphatase OS=Aeromonas sp. CA23 OX=2033032 GN=glpX PE=3 SV=1	K02446	M00165Â Reductive pentose phosphate cycle (Calvin cycle)Â (8)Â Â (2 blocks missing 9/11)	tr|A0A291TWE8|A0A291TWE8_9GAMM	incomplete		0.52	-0.943416	NO_SP	FALSE	FALSE
866	593	A0A291U0G4|A0A291U0G4	0.77	20	5	5	0.384615	1.42446	15100000	8980000	11700000	8470000	51830	Glyceraldehyde-3-phosphate dehydrogenase OS=Aeromonas sp. CA23 OX=2033032 GN=CK910_10235 PE=3 SV=1	K00134	M00165Â Reductive pentose phosphate cycle (Calvin cycle)Â (8)Â Â (2 blocks missing 9/11)	tr|A0A291U0G4|A0A291U0G4_9GAMM, tr|A0A291TZV8|A0A291TZV8_9GAMM	incomplete		0.72	-0.473931	NO_SP	FALSE	FALSE
52	56	A0A291TY48|A0A291TY48	4.48	77	31	31	1.19231	14.5707	353000000	594000000	106000000	159000000	55209	ATP synthase subunit alpha OS=Aeromonas sp. CA23 OX=2033032 GN=atpA PE=3 SV=1	K02111	M00157Â F-type ATPase, prokaryotes and chloroplastsÂ (8)Â Â (complete 1/1)	tr|A0A291TY48|A0A291TY48_9GAMM	complete		1.51	0.594549	NO_SP	FALSE	FALSE
114	63	A0A291TXF3|A0A291TXF3	2.11	54	26	26	1.08333	11.1153	335000000	409000000	163000000	223000000	50347	ATP synthase subunit beta OS=Aeromonas sp. CA23 OX=2033032 GN=atpD PE=3 SV=1	K02112	M00157Â F-type ATPase, prokaryotes and chloroplastsÂ (8)Â Â (complete 1/1)	tr|A0A291TXF3|A0A291TXF3_9GAMM	complete		1.36	0.443607	NO_SP	FALSE	FALSE
141	143	A0A291TXP4|A0A291TXP4	10.11	71	22	22	1.22222	15.681	198000000	125000000	90000000	51500000	31927	ATP synthase gamma chain OS=Aeromonas sp. CA23 OX=2033032 GN=atpG PE=3 SV=1	K02115	M00157Â F-type ATPase, prokaryotes and chloroplastsÂ (8)Â Â (complete 1/1)	tr|A0A291TXP4|A0A291TXP4_9GAMM	complete		0.57	-0.810966	NO_SP	FALSE	FALSE
316	467	A0A291TXA0|A0A291TXA0	1.55	73	16	16	2	99	238000000	194000000	126000000	102000000	17165	ATP synthase subunit b OS=Aeromonas sp. CA23 OX=2033032 GN=atpF PE=3 SV=1	K02109	M00157Â F-type ATPase, prokaryotes and chloroplastsÂ (8)Â Â (complete 1/1)	tr|A0A291TXA0|A0A291TXA0_9GAMM	complete		0.81	-0.304006	NO_SP	FALSE	FALSE
472	431	A0A291TXW3|A0A291TXW3	6.75	59	9	9	1.28571	18.307	222000000	289000000	171000000	226000000	18937	ATP synthase subunit delta OS=Aeromonas sp. CA23 OX=2033032 GN=atpH PE=3 SV=1	K02113	M00157Â F-type ATPase, prokaryotes and chloroplastsÂ (8)Â Â (complete 1/1)	tr|A0A291TXW3|A0A291TXW3_9GAMM	complete		1.32	0.400538	NO_SP	FALSE	FALSE
975	716	A0A291U7Q7|A0A291U7Q7	5.32	42	4	4	0.8	5.30957	1220000000	1070000000	1210000000	1050000000	14988	ATP synthase epsilon chain OS=Aeromonas sp. CA23 OX=2033032 GN=atpC PE=3 SV=1	K02114	M00157Â F-type ATPase, prokaryotes and chloroplastsÂ (8)Â Â (complete 1/1)	tr|A0A291U7Q7|A0A291U7Q7_9GAMM	complete		0.87	-0.200913	NO_SP	FALSE	FALSE
1914	3085	A0A291TXK7|A0A291TXK7	2.8	18	2	2	0.666667	3.64159	14800000	11000000	14800000	11000000	28983	ATP synthase subunit a OS=Aeromonas sp. CA23 OX=2033032 GN=atpB PE=3 SV=1	K02108	M00157Â F-type ATPase, prokaryotes and chloroplastsÂ (8)Â Â (complete 1/1)	tr|A0A291TXK7|A0A291TXK7_9GAMM	complete		0.74	-0.434403	NO_SP	FALSE	FALSE
250	717	A0A291U369|A0A291U369	2.62	44	13	13	0.866667	6.35642	205000000	91400000	107000000	59900000	35675	Cbb3-type cytochrome c oxidase subunit OS=Aeromonas sp. CA23 OX=2033032 GN=ccoP PE=3 SV=1	K00406	M00156Â Cytochrome c oxidase, cbb3-typeÂ (4)Â Â (complete 1/1)	tr|A0A291U369|A0A291U369_9GAMM	complete		0.56	-0.836501	NO_SP	FALSE	FALSE
257	346	A0A291U3K6|A0A291U3K6	1.86	62	14	14	1.4	24.1189	936000000	747000000	652000000	533000000	22825	Cytochrome-c oxidase cbb3-type subunit II OS=Aeromonas sp. CA23 OX=2033032 GN=ccoO PE=4 SV=1	K00405	M00156Â Cytochrome c oxidase, cbb3-typeÂ (4)Â Â (complete 1/1)	tr|A0A291U3K6|A0A291U3K6_9GAMM	complete		0.82	-0.286304	NO_SP	FALSE	FALSE
224	294	A0A291TZC6|A0A291TZC6	17.5	23	20	20	1.66667	45.4159	1800000000	578000000	1140000000	369000000	58133	Cytochrome d terminal oxidase subunit 1 OS=Aeromonas sp. CA23 OX=2033032 GN=CK910_08840 PE=3 SV=1	K00425	M00153Â Cytochrome bd ubiquinol oxidaseÂ (3)Â Â (complete 1/1)	tr|A0A291TZC6|A0A291TZC6_9GAMM, tr|A0A291U5N9|A0A291U5N9_9GAMM	complete		0.32	-1.64386	NO_SP	FALSE	FALSE
377	361	A0A291TYL9|A0A291TYL9	14.97	84	14	14	2	99	335000000	924000000	250000000	725000000	21125	Ubiquinol-cytochrome c reductase iron-sulfur subunit OS=Aeromonas sp. CA23 OX=2033032 GN=petA PE=3 SV=1	K00411	M00151Â Cytochrome bc1 complex respiratory unitÂ (3)Â Â (complete 1/1)	tr|A0A291TYL9|A0A291TYL9_9GAMM	complete		2.9	1.53605	TAT	FALSE	FALSE
506	610	A0A291TYZ1|A0A291TYZ1	0.29	45	7	7	0.777778	4.99484	494000000	555000000	364000000	398000000	27468	Cytochrome c1 OS=Aeromonas sp. CA23 OX=2033032 GN=CK910_07200 PE=4 SV=1	K00413	M00151Â Cytochrome bc1 complex respiratory unitÂ (3)Â Â (complete 1/1)	tr|A0A291TYZ1|A0A291TYZ1_9GAMM	complete		1.09	0.124328	SP	FALSE	FALSE
931	898	A0A291TYK0|A0A291TYK0	1.55	10	4	4	0.4	1.51189	48100000	42400000	39400000	41700000	46304	Cytochrome b OS=Aeromonas sp. CA23 OX=2033032 GN=CK910_07195 PE=3 SV=1	K00412	M00151Â Cytochrome bc1 complex respiratory unitÂ (3)Â Â (complete 1/1)	tr|A0A291TYK0|A0A291TYK0_9GAMM	complete		1.06	0.0840643	NO_SP	FALSE	FALSE
74	46	A0A291U0W1|A0A291U0W1	0.26	48	24	24	0.827586	5.72336	577000000	425000000	251000000	197000000	65305	Fumarate reductase flavoprotein subunit OS=Aeromonas sp. CA23 OX=2033032 GN=CK910_10975 PE=3 SV=1	K00244	M00150Â Fumarate reductase, prokaryotesÂ (4)Â Â (complete 1/1)	tr|A0A291U0W1|A0A291U0W1_9GAMM	complete		0.78	-0.358454	NO_SP	FALSE	FALSE
169	126	A0A291U0E3|A0A291U0E3	1.7	91	19	19	1.35714	21.7585	823000000	295000000	587000000	230000000	27688	Fumarate reductase iron-sulfur subunit OS=Aeromonas sp. CA23 OX=2033032 GN=CK910_10970 PE=3 SV=1	K00245	M00150Â Fumarate reductase, prokaryotesÂ (4)Â Â (complete 1/1)	tr|A0A291U0E3|A0A291U0E3_9GAMM	complete		0.39	-1.35845	NO_SP	FALSE	FALSE
1362	2138	A0A291U0G1|A0A291U0G1	13.47	14	2	2	0.5	2.16228	31900000	18700000	28400000	16300000	15058	Fumarate reductase subunit C OS=Aeromonas sp. CA23 OX=2033032 GN=frdC PE=3 SV=1	K00246	M00150Â Fumarate reductase, prokaryotesÂ (4)Â Â (complete 1/1)	tr|A0A291U0G1|A0A291U0G1_9GAMM	complete		0.58	-0.785875	NO_SP	FALSE	FALSE
87	37	A0A291U326|A0A291U326	5.02	56	30	30	1.15385	13.251	300000000	452000000	143000000	199000000	64370	Succinate dehydrogenase flavoprotein subunit OS=Aeromonas sp. CA23 OX=2033032 GN=CK910_15510 PE=3 SV=1	K00239	M00149Â Succinate dehydrogenase, prokaryotesÂ (4)Â Â (complete 1/1)	tr|A0A291U326|A0A291U326_9GAMM	complete		1.39	0.475085	NO_SP	FALSE	FALSE
495	289	A0A291U327|A0A291U327	0.09	59	10	10	0.769231	4.87802	169000000	159000000	131000000	122000000	26678	Succinate dehydrogenase iron-sulfur subunit OS=Aeromonas sp. CA23 OX=2033032 GN=sdhB PE=3 SV=1	K00240	M00149Â Succinate dehydrogenase, prokaryotesÂ (4)Â Â (complete 1/1)	tr|A0A291U327|A0A291U327_9GAMM	complete		0.93	-0.104697	NO_SP	FALSE	FALSE
195	208	A0A291U4P6|A0A291U4P6	3.11	30	19	19	0.513514	2.26222	229000000	58700000	89300000	37600000	100306	NADH-quinone oxidoreductase OS=Aeromonas sp. CA23 OX=2033032 GN=CK910_18970 PE=3 SV=1	K00336	M00144Â NADH:quinone oxidoreductase, prokaryotesÂ (13)Â Â (complete 1/1)	tr|A0A291U4P6|A0A291U4P6_9GAMM	complete		0.42	-1.25154	NO_SP	FALSE	FALSE
247	432	A0A291U7B8|A0A291U7B8	7.67	40	13	13	0.590909	2.8986	84100000	22200000	49400000	13400000	49952	NADH-quinone oxidoreductase subunit F OS=Aeromonas sp. CA23 OX=2033032 GN=CK910_18965 PE=3 SV=1	K00335	M00144Â NADH:quinone oxidoreductase, prokaryotesÂ (13)Â Â (complete 1/1)	tr|A0A291U7B8|A0A291U7B8_9GAMM	complete		0.27	-1.88897	NO_SP	FALSE	FALSE
326	539	A0A291U4C7|A0A291U4C7	7.6	68	9	9	1	9	202000000	107000000	116000000	67400000	25532	NADH-quinone oxidoreductase subunit B OS=Aeromonas sp. CA23 OX=2033032 GN=nuoB PE=3 SV=1	K00331	M00144Â NADH:quinone oxidoreductase, prokaryotesÂ (13)Â Â (complete 1/1)	tr|A0A291U4C7|A0A291U4C7_9GAMM	complete		0.58	-0.785875	NO_SP	FALSE	FALSE
588	600	A0A291U4W6|A0A291U4W6	12.86	40	11	11	1.22222	15.681	470000000	309000000	385000000	252000000	20354	NADH-quinone oxidoreductase subunit I OS=Aeromonas sp. CA23 OX=2033032 GN=nuoI PE=3 SV=1	K00338	M00144Â NADH:quinone oxidoreductase, prokaryotesÂ (13)Â Â (complete 1/1)	tr|A0A291U4W6|A0A291U4W6_9GAMM	complete		0.65	-0.621488	NO_SP	FALSE	FALSE
1359	1655	A0A291U4S0|A0A291U4S0	7.77	22	3	3	0.428571	1.6827	2080000	640000	2080000	640000	19440	NADH dehydrogenase I subunit E OS=Aeromonas sp. CA23 OX=2033032 GN=CK910_18960 PE=3 SV=1	K00334	M00144Â NADH:quinone oxidoreductase, prokaryotesÂ (13)Â Â (complete 1/1)	tr|A0A291U4S0|A0A291U4S0_9GAMM	complete		0.31	-1.68966	NO_SP	FALSE	FALSE
51	33	A0A291U0L3|A0A291U0L3	6.11	82	29	29	1.52632	32.5982	1980000000	682000000	786000000	239000000	45482	Serine hydroxymethyltransferase OS=Aeromonas sp. CA23 OX=2033032 GN=glyA PE=3 SV=1	K00600	M00141Â C1-unit interconversion, eukaryotesÂ (1)Â Â (1 block missing 1/2)	tr|A0A291U0L3|A0A291U0L3_9GAMM	incomplete		0.3	-1.73697	NO_SP	FALSE	FALSE
51	33	A0A291U0L3|A0A291U0L3	6.11	82	29	29	1.52632	32.5982	1980000000	682000000	786000000	239000000	45482	Serine hydroxymethyltransferase OS=Aeromonas sp. CA23 OX=2033032 GN=glyA PE=3 SV=1	K00600	M00140Â C1-unit interconversion, prokaryotesÂ (3)Â Â (complete 3/3)	tr|A0A291U0L3|A0A291U0L3_9GAMM	complete		0.3	-1.73697	NO_SP	FALSE	FALSE
461	248	A0A291U2V6|A0A291U2V6	2.39	54	10	10	1.11111	11.9155	83000000	22800000	50500000	15500000	30781	Bifunctional protein FolD OS=Aeromonas sp. CA23 OX=2033032 GN=folD PE=3 SV=1	K01491	M00140Â C1-unit interconversion, prokaryotesÂ (3)Â Â (complete 3/3)	tr|A0A291U2V6|A0A291U2V6_9GAMM	complete		0.31	-1.68966	NO_SP	FALSE	FALSE
136	245	A0A291U1T9|A0A291U1T9	9.47	65	21	21	1.05	10.2202	722000000	1020000000	554000000	802000000	46404	Gamma-glutamylputrescine oxidoreductase OS=Aeromonas sp. CA23 OX=2033032 GN=CK910_12040 PE=4 SV=1	K09471	M00136Â GABA biosynthesis, prokaryotes, putrescine => GABAÂ (1)Â Â (incomplete 1/4)	tr|A0A291TVW8|A0A291TVW8_9GAMM, tr|A0A291U1T9|A0A291U1T9_9GAMM	complete		1.45	0.536053	NO_SP	FALSE	FALSE
360	224	A0A291TVW8|A0A291TVW8	12.23	46	15	15	0.75	4.62341	268000000	436000000	183000000	320000000	47574	FAD-dependent oxidoreductase OS=Aeromonas sp. CA23 OX=2033032 GN=CK910_01065 PE=4 SV=1	K09471	M00136Â GABA biosynthesis, prokaryotes, putrescine => GABAÂ (1)Â Â (incomplete 1/4)	tr|A0A291TVW8|A0A291TVW8_9GAMM, tr|A0A291U1T9|A0A291U1T9_9GAMM	complete		1.74	0.799087	NO_SP	FALSE	FALSE
165	24	A0A291U509|A0A291U509	10.23	48	23	23	1.04545	10.1034	358000000	17600000	230000000	13300000	70232	Biosynthetic arginine decarboxylase OS=Aeromonas sp. CA23 OX=2033032 GN=speA PE=3 SV=1	K01585	M00133Â Polyamine biosynthesis, arginine => agmatine => putrescine => spermidineÂ (2)Â Â (2 blocks missing 2/4)	tr|A0A291U509|A0A291U509_9GAMM	incomplete		0.06	-4.05889	NO_SP	FALSE	FALSE
1376	1000	A0A291U5D4|A0A291U5D4	2.66	12	3	3	0.1875	0.539927	18400000	12200000	18400000	12200000	31006	Inositol-1-monophosphatase OS=Aeromonas sp. CA23 OX=2033032 GN=CK910_19285 PE=3 SV=1	K01092	M00131Â Inositol phosphate metabolism, Ins(1,3,4,5)P4 => Ins(1,3,4)P3 => myo-inositolÂ (1)Â Â (incomplete 1/4)	tr|A0A291U5D4|A0A291U5D4_9GAMM	complete		0.66	-0.599462	NO_SP	FALSE	FALSE
207	172	A0A291U7K0|A0A291U7K0	14.82	31	15	15	0.625	3.21697	313000000	75300000	189000000	43300000	49402	UDP-glucose 6-dehydrogenase OS=Aeromonas sp. CA23 OX=2033032 GN=CK910_23565 PE=3 SV=1	K00012	M00129Â Ascorbate biosynthesis, animals, glucose-1P => ascorbateÂ (2)Â Â (incomplete 2/7)	tr|A0A291U7K0|A0A291U7K0_9GAMM	complete		0.23	-2.12029	NO_SP	FALSE	FALSE
455	383	A0A291U764|A0A291U764	2.04	32	10	10	0.833333	5.81292	86600000	45600000	64200000	35200000	33620	UTP--glucose-1-phosphate uridylyltransferase OS=Aeromonas sp. CA23 OX=2033032 GN=galU PE=3 SV=1	K00963	M00129Â Ascorbate biosynthesis, animals, glucose-1P => ascorbateÂ (2)Â Â (incomplete 2/7)	tr|A0A291U764|A0A291U764_9GAMM	complete		0.55	-0.862496	NO_SP	FALSE	FALSE
484	323	A0A291TWP0|A0A291TWP0	35.43	61	12	12	0.857143	6.19686	112000000	5120000	84800000	2680000	26629	Thiazole synthase OS=Aeromonas sp. CA23 OX=2033032 GN=thiG PE=3 SV=1	K03149	M00127Â Thiamine biosynthesis, prokaryotes, AIR (+ DXP/tyrosine) => TMP/TPPÂ (8)Â Â (complete 7/7)	tr|A0A291TWP0|A0A291TWP0_9GAMM	complete		0.03	-5.05889	NO_SP	CORRECT	CORRECT
1278	1522	A0A291U7D3|A0A291U7D3	22.03	9	3	3	0.12	0.318257	3150000	537000	3150000	537000	45640	2-iminoacetate synthase ThiH OS=Aeromonas sp. CA23 OX=2033032 GN=CK910_02815 PE=4 SV=1	K03150	M00127Â Thiamine biosynthesis, prokaryotes, AIR (+ DXP/tyrosine) => TMP/TPPÂ (8)Â Â (complete 7/7)	tr|A0A291U7D3|A0A291U7D3_9GAMM	complete		0.17	-2.55639	NO_SP	FALSE	FALSE
1537	778	A0A291TWV8|A0A291TWV8	2.95	5	3	3	0.0909091	0.232847	10400000	221000	10400000	221000	75593	Phosphomethylpyrimidine synthase OS=Aeromonas sp. CA23 OX=2033032 GN=thiC PE=3 SV=1	K03147	M00127Â Thiamine biosynthesis, prokaryotes, AIR (+ DXP/tyrosine) => TMP/TPPÂ (8)Â Â (complete 7/7)	tr|A0A291TWV8|A0A291TWV8_9GAMM	complete		0.02	-5.64386	NO_SP	FALSE	FALSE
578	670	A0A291U517|A0A291U517	10.87	56	10	10	0.833333	5.81292	176000000	29000000	134000000	24400000	24093	GTP cyclohydrolase 1 OS=Aeromonas sp. CA23 OX=2033032 GN=folE PE=3 SV=1	K01495	M00126Â Tetrahydrofolate biosynthesis, GTP => THFÂ (8)Â Â (complete 5/5)	tr|A0A291U517|A0A291U517_9GAMM	complete		0.18	-2.47393	NO_SP	FALSE	FALSE
800	549	A0A291U057|A0A291U057	5.49	30	8	8	0.666667	3.64159	35600000	15100000	28000000	13100000	30488	Dihydropteroate synthase OS=Aeromonas sp. CA23 OX=2033032 GN=folP PE=3 SV=1	K00796	M00126Â Tetrahydrofolate biosynthesis, GTP => THFÂ (8)Â Â (complete 5/5)	tr|A0A291U057|A0A291U057_9GAMM	complete		0.47	-1.08927	NO_SP	FALSE	FALSE
956	915	A0A291U0R3|A0A291U0R3	11.49	33	5	5	0.5	2.16228	14300000	6420000	12100000	5240000	18495	Dihydrofolate reductase OS=Aeromonas sp. CA23 OX=2033032 GN=CK910_10165 PE=3 SV=1	K00287	M00126Â Tetrahydrofolate biosynthesis, GTP => THFÂ (8)Â Â (complete 5/5)	tr|A0A291U0R3|A0A291U0R3_9GAMM	complete		0.43	-1.21759	NO_SP	FALSE	FALSE
1510	3124	A0A291TZ44|A0A291TZ44	16.58	46	3	3	0.75	4.62341	41300000	13700000	41300000	13700000	13544	7 8-dihydroneopterin aldolase OS=Aeromonas sp. CA23 OX=2033032 GN=folB PE=3 SV=1	K01633	M00126Â Tetrahydrofolate biosynthesis, GTP => THFÂ (8)Â Â (complete 5/5)	tr|A0A291TZ44|A0A291TZ44_9GAMM	complete		0.33	-1.59946	NO_SP	FALSE	FALSE
516	798	A0A291U4G8|A0A291U4G8	18.6	59	10	10	0.833333	5.81292	52400000	17700000	34200000	11800000	21554	GTP cyclohydrolase-2 OS=Aeromonas sp. CA23 OX=2033032 GN=ribA PE=3 SV=1	K01497	M00125Â Riboflavin biosynthesis, plants and bacteria, GTP => riboflavin/FMN/FADÂ (8)Â Â (complete 7/7)	tr|A0A291U4G8|A0A291U4G8_9GAMM	complete		0.35	-1.51457	NO_SP	FALSE	FALSE
656	620	A0A291U0K2|A0A291U0K2	4.22	88	11	11	1.57143	36.2759	69800000	35300000	37500000	23200000	16519	6 7-dimethyl-8-ribityllumazine synthase OS=Aeromonas sp. CA23 OX=2033032 GN=ribH PE=3 SV=1	K00794	M00125Â Riboflavin biosynthesis, plants and bacteria, GTP => riboflavin/FMN/FADÂ (8)Â Â (complete 7/7)	tr|A0A291U0K2|A0A291U0K2_9GAMM	complete		0.62	-0.68966	NO_SP	FALSE	FALSE
1487	1016	A0A291U3K9|A0A291U3K9	24.59	15	3	3	0.428571	1.6827	13500000	786000	13500000	786000	22382	Riboflavin synthase OS=Aeromonas sp. CA23 OX=2033032 GN=CK910_17455 PE=4 SV=1	K00793	M00125Â Riboflavin biosynthesis, plants and bacteria, GTP => riboflavin/FMN/FADÂ (8)Â Â (complete 7/7)	tr|A0A291U7N7|A0A291U7N7_9GAMM, tr|A0A291U3K9|A0A291U3K9_9GAMM	complete		0.06	-4.05889	NO_SP	FALSE	CORRECT
50	62	A0A291U3V4|A0A291U3V4	10.66	70	30	30	1.5	30.6228	1610000000	612000000	608000000	247000000	39379	Phosphoserine aminotransferase OS=Aeromonas sp. CA23 OX=2033032 GN=serC PE=3 SV=1	K00831	M00124Â Pyridoxal-P biosynthesis, erythrose-4P => pyridoxal-PÂ (6)Â Â (complete 6/6)	tr|A0A291U3V4|A0A291U3V4_9GAMM	complete		0.41	-1.2863	NO_SP	FALSE	FALSE
371	285	A0A291TVC9|A0A291TVC9	13.79	52	13	13	1.18182	14.1991	1080000000	471000000	864000000	350000000	26561	Pyridoxine 5'-phosphate synthase OS=Aeromonas sp. CA23 OX=2033032 GN=pdxJ PE=3 SV=1	K03474	M00124Â Pyridoxal-P biosynthesis, erythrose-4P => pyridoxal-PÂ (6)Â Â (complete 6/6)	tr|A0A291TVC9|A0A291TVC9_9GAMM	complete		0.41	-1.2863	NO_SP	FALSE	FALSE
937	1290	A0A291U1Z4|A0A291U1Z4	11.91	16	4	4	0.190476	0.550516	19500000	6000000	17500000	4940000	41159	Erythronate-4-phosphate dehydrogenase OS=Aeromonas sp. CA23 OX=2033032 GN=pdxB PE=3 SV=1	K03473	M00124Â Pyridoxal-P biosynthesis, erythrose-4P => pyridoxal-PÂ (6)Â Â (complete 6/6)	tr|A0A291U1Z4|A0A291U1Z4_9GAMM	complete		0.28	-1.8365	NO_SP	FALSE	FALSE
1155	694	A0A291U513|A0A291U513	1.86	17	4	4	0.307692	1.03092	73300000	55100000	72000000	54500000	24474	Pyridoxine/pyridoxamine 5'-phosphate oxidase OS=Aeromonas sp. CA23 OX=2033032 GN=pdxH PE=3 SV=1	K00275	M00124Â Pyridoxal-P biosynthesis, erythrose-4P => pyridoxal-PÂ (6)Â Â (complete 6/6)	tr|A0A291U513|A0A291U513_9GAMM	complete		0.76	-0.395929	NO_SP	FALSE	FALSE
1478	2990	A0A291TVA2|A0A291TVA2	2.57	11	2	2	0.2	0.584893	5500000	10500000	5500000	10500000	35011	4-hydroxythreonine-4-phosphate dehydrogenase OS=Aeromonas sp. CA23 OX=2033032 GN=pdxA PE=3 SV=1	K00097	M00124Â Pyridoxal-P biosynthesis, erythrose-4P => pyridoxal-PÂ (6)Â Â (complete 6/6)	tr|A0A291TVA2|A0A291TVA2_9GAMM	complete		1.9	0.925999	NO_SP	FALSE	FALSE
541	616	A0A291U525|A0A291U525	2.24	54	8	8	0.888889	6.74264	95000000	115000000	88200000	107000000	24421	ATP-dependent dethiobiotin synthetase BioD OS=Aeromonas sp. CA23 OX=2033032 GN=bioD PE=3 SV=1	K01935	M00123Â Biotin biosynthesis, pimeloyl-ACP/CoA => biotinÂ (4)Â Â (complete 3/3)	tr|A0A291U525|A0A291U525_9GAMM	complete		1.21	0.275007	NO_SP	FALSE	FALSE
1556	3189	A0A291U541|A0A291U541	2.39	6	2	2	0.105263	0.274275	2590000	597000	2590000	597000	51835	Adenosylmethionine-8-amino-7-oxononanoate aminotransferase OS=Aeromonas sp. CA23 OX=2033032 GN=bioA PE=3 SV=1	K00833	M00123Â Biotin biosynthesis, pimeloyl-ACP/CoA => biotinÂ (4)Â Â (complete 3/3)	tr|A0A291U541|A0A291U541_9GAMM	complete		0.23	-2.12029	NO_SP	FALSE	FALSE
1324	1895	A0A291U537|A0A291U537	2.76	14	3	3	0.428571	1.6827	4180000	4680000	4180000	4680000	21081	Corrinoid adenosyltransferase OS=Aeromonas sp. CA23 OX=2033032 GN=CK910_18760 PE=3 SV=1	K00798	M00122Â Cobalamin biosynthesis, cobyrinate a,c-diamide => cobalaminÂ (2)Â Â (incomplete 2/7)	tr|A0A291TXY7|A0A291TXY7_9GAMM, tr|A0A291U537|A0A291U537_9GAMM	complete		1.12	0.163499	NO_SP	FALSE	FALSE
1665	2648	A0A291TXY7|A0A291TXY7	0.23	12	2	2	0.25	0.778279	4840000	1270000	1310000	1080000	20380	ATP--cob(I)alamin adenosyltransferase OS=Aeromonas sp. CA23 OX=2033032 GN=CK910_05630 PE=4 SV=1	K00798	M00122Â Cobalamin biosynthesis, cobyrinate a,c-diamide => cobalaminÂ (2)Â Â (incomplete 2/7)	tr|A0A291TXY7|A0A291TXY7_9GAMM, tr|A0A291U537|A0A291U537_9GAMM	complete		0.82	-0.286304	NO_SP	FALSE	FALSE
393	331	A0A291U094|A0A291U094	4.22	30	11	11	0.44	1.75423	77900000	38600000	54000000	30800000	52717	Glutamate--tRNA ligase OS=Aeromonas sp. CA23 OX=2033032 GN=gltX PE=3 SV=1	K01885	M00121Â Heme biosynthesis, plants and bacteria, glutamate => hemeÂ (11)Â Â (complete 10/10)	tr|A0A291U094|A0A291U094_9GAMM	complete		0.57	-0.810966	NO_SP	FALSE	FALSE
515	398	A0A291TVK8|A0A291TVK8	8.78	50	10	10	0.909091	7.11131	89600000	60200000	64800000	45600000	39546	Uroporphyrinogen decarboxylase OS=Aeromonas sp. CA23 OX=2033032 GN=hemE PE=3 SV=1	K01599	M00121Â Heme biosynthesis, plants and bacteria, glutamate => hemeÂ (11)Â Â (complete 10/10)	tr|A0A291TVK8|A0A291TVK8_9GAMM	complete		0.7	-0.514573	NO_SP	FALSE	FALSE
699	745	A0A291TW89|A0A291TW89	0.24	15	6	6	0.333333	1.15443	229000000	229000000	228000000	228000000	34375	Porphobilinogen deaminase OS=Aeromonas sp. CA23 OX=2033032 GN=hemC PE=3 SV=1	K01749	M00121Â Heme biosynthesis, plants and bacteria, glutamate => hemeÂ (11)Â Â (complete 10/10)	tr|A0A291TW89|A0A291TW89_9GAMM	complete		1	0	NO_SP	FALSE	FALSE
704	324	A0A291TXY5|A0A291TXY5	2.61	31	11	11	1	9	108000000	76800000	86600000	62000000	37070	Delta-aminolevulinic acid dehydratase OS=Aeromonas sp. CA23 OX=2033032 GN=CK910_04975 PE=3 SV=1	K01698	M00121Â Heme biosynthesis, plants and bacteria, glutamate => hemeÂ (11)Â Â (complete 10/10)	tr|A0A291TXY5|A0A291TXY5_9GAMM	complete		0.72	-0.473931	NO_SP	FALSE	FALSE
762	493	A0A291U4U0|A0A291U4U0	2.87	44	8	8	0.533333	2.41455	23200000	25100000	18900000	21200000	36509	Ferrochelatase OS=Aeromonas sp. CA23 OX=2033032 GN=hemH PE=3 SV=1	K01772	M00121Â Heme biosynthesis, plants and bacteria, glutamate => hemeÂ (11)Â Â (complete 10/10)	tr|A0A291U4U0|A0A291U4U0_9GAMM	complete		1.12	0.163499	NO_SP	FALSE	FALSE
1396	724	A0A291TWW9|A0A291TWW9	0.59	7	3	3	0.130435	0.350314	11200000	2800000	11200000	2800000	52788	Coproporphyrinogen-III oxidase OS=Aeromonas sp. CA23 OX=2033032 GN=hemN PE=3 SV=1	K02495	M00121Â Heme biosynthesis, plants and bacteria, glutamate => hemeÂ (11)Â Â (complete 10/10)	tr|A0A291TWW9|A0A291TWW9_9GAMM	complete		0.25	-2	NO_SP	FALSE	FALSE
1563	2871	A0A291U6H5|A0A291U6H5	7.98	13	3	3	0.3	0.995262	5950000	2270000	5950000	2270000	22981	Protoporphyrinogen IX dehydrogenase [quinone] OS=Aeromonas sp. CA23 OX=2033032 GN=hemG PE=3 SV=1	K00230	M00121Â Heme biosynthesis, plants and bacteria, glutamate => hemeÂ (11)Â Â (complete 10/10)	tr|A0A291U6H5|A0A291U6H5_9GAMM	complete		0.38	-1.39593	NO_SP	FALSE	FALSE
1748	1591	A0A291TZP3|A0A291TZP3	0.58	6	2	2	0.142857	0.389495	1690000	1550000	1690000	1550000	45862	Glutamate-1-semialdehyde 2 1-aminomutase OS=Aeromonas sp. CA23 OX=2033032 GN=hemL PE=3 SV=1	K01845	M00121Â Heme biosynthesis, plants and bacteria, glutamate => hemeÂ (11)Â Â (complete 10/10)	tr|A0A291TZP3|A0A291TZP3_9GAMM	complete		0.92	-0.120294	NO_SP	FALSE	FALSE
705	541	A0A291TXE6|A0A291TXE6	1.28	58	6	6	0.6	2.98107	90600000	75000000	75300000	63000000	17576	Phosphopantetheine adenylyltransferase OS=Aeromonas sp. CA23 OX=2033032 GN=coaD PE=3 SV=1	K00954	M00120Â Coenzyme A biosynthesis, pantothenate => CoAÂ (4)Â Â (complete 3/3)	tr|A0A291TXE6|A0A291TXE6_9GAMM	complete		0.84	-0.251539	NO_SP	FALSE	FALSE
1008	957	A0A291TYN3|A0A291TYN3	21.28	13	4	4	0.210526	0.623777	6940000	2480000	6490000	2160000	36217	Pantothenate kinase OS=Aeromonas sp. CA23 OX=2033032 GN=coaA PE=3 SV=1	K00867	M00120Â Coenzyme A biosynthesis, pantothenate => CoAÂ (4)Â Â (complete 3/3)	tr|A0A291TYN3|A0A291TYN3_9GAMM	complete		0.33	-1.59946	NO_SP	FALSE	FALSE
104	105	A0A291TXS3|A0A291TXS3	7.51	61	18	18	1.2	14.8489	4730000000	1840000000	4220000000	1670000000	34350	Branched-chain-amino-acid aminotransferase OS=Aeromonas sp. CA23 OX=2033032 GN=ilvE PE=3 SV=1	K00826	M00119Â Pantothenate biosynthesis, valine/L-aspartate => pantothenateÂ (4)Â Â (1 block missing 4/5)	tr|A0A291TXS3|A0A291TXS3_9GAMM	incomplete		0.39	-1.35845	NO_SP	FALSE	FALSE
426	236	A0A291TZR7|A0A291TZR7	7.95	40	11	11	1	9	168000000	62700000	144000000	44800000	30949	Pantothenate synthetase OS=Aeromonas sp. CA23 OX=2033032 GN=panC PE=3 SV=1	K01918	M00119Â Pantothenate biosynthesis, valine/L-aspartate => pantothenateÂ (4)Â Â (1 block missing 4/5)	tr|A0A291TZR7|A0A291TZR7_9GAMM	incomplete		0.31	-1.68966	NO_SP	FALSE	FALSE
680	571	A0A291U026|A0A291U026	5.04	31	6	6	0.75	4.62341	24100000	8180000	22100000	7240000	28658	3-methyl-2-oxobutanoate hydroxymethyltransferase OS=Aeromonas sp. CA23 OX=2033032 GN=panB PE=3 SV=1	K00606	M00119Â Pantothenate biosynthesis, valine/L-aspartate => pantothenateÂ (4)Â Â (1 block missing 4/5)	tr|A0A291U026|A0A291U026_9GAMM	incomplete		0.33	-1.59946	NO_SP	FALSE	FALSE
260	98	A0A291TVM6|A0A291TVM6	10.57	33	18	18	0.782609	5.0619	217000000	96700000	138000000	64100000	60474	Glutamate--cysteine ligase OS=Aeromonas sp. CA23 OX=2033032 GN=gshA PE=3 SV=1	K01919	M00118Â Glutathione biosynthesis, glutamate => glutathioneÂ (3)Â Â (complete 2/2)	tr|A0A291TVM6|A0A291TVM6_9GAMM	complete		0.47	-1.08927	NO_SP	FALSE	FALSE
285	198	A0A291U1G9|A0A291U1G9	2.2	46	13	13	0.928571	7.48343	99800000	107000000	69700000	82800000	35340	Glutathione synthetase OS=Aeromonas sp. CA23 OX=2033032 GN=gshB PE=3 SV=1	K01920	M00118Â Glutathione biosynthesis, glutamate => glutathioneÂ (3)Â Â (complete 2/2)	tr|A0A291U1G9|A0A291U1G9_9GAMM	complete		1.19	0.250962	NO_SP	FALSE	FALSE
566	510	A0A291TXY9|A0A291TXY9	9.39	15	9	9	0.473684	1.97635	14400000	16900000	7180000	14100000	55157	3-octaprenyl-4-hydroxybenzoate carboxy-lyase OS=Aeromonas sp. CA23 OX=2033032 GN=ubiD PE=3 SV=1	K03182	M00117Â Ubiquinone biosynthesis, prokaryotes, chorismate (+ polyprenyl-PP) => ubiquinolÂ (9)Â Â (complete 9/9)	tr|A0A291TXY9|A0A291TXY9_9GAMM	complete		1.96	0.970854	NO_SP	FALSE	FALSE
615	1047	A0A291U0T3|A0A291U0T3	2.8	14	5	5	0.277778	0.895736	10300000	6800000	8570000	5260000	42664	2-octaprenyl-3-methyl-6-methoxy-1 4-benzoquinol hydroxylase OS=Aeromonas sp. CA23 OX=2033032 GN=ubiF PE=3 SV=1	K03184	M00117Â Ubiquinone biosynthesis, prokaryotes, chorismate (+ polyprenyl-PP) => ubiquinolÂ (9)Â Â (complete 9/9)	tr|A0A291U0T3|A0A291U0T3_9GAMM	complete		0.61	-0.713119	NO_SP	FALSE	FALSE
942	1179	A0A291U380|A0A291U380	26.8	20	3	3	0.25	0.778279	6640000	59800	6640000	59800	26266	Ubiquinone biosynthesis O-methyltransferase OS=Aeromonas sp. CA23 OX=2033032 GN=ubiG PE=3 SV=1	K00568	M00117Â Ubiquinone biosynthesis, prokaryotes, chorismate (+ polyprenyl-PP) => ubiquinolÂ (9)Â Â (complete 9/9)	tr|A0A291U380|A0A291U380_9GAMM	complete		0.02	-5.64386	NO_SP	FALSE	CORRECT
954	851	A0A291U017|A0A291U017	17.19	53	9	9	0.692308	3.92388	25300000	6440000	17000000	3560000	21983	Flavin prenyltransferase UbiX OS=Aeromonas sp. CA23 OX=2033032 GN=ubiX PE=3 SV=1	K03186	M00117Â Ubiquinone biosynthesis, prokaryotes, chorismate (+ polyprenyl-PP) => ubiquinolÂ (9)Â Â (complete 9/9)	tr|A0A291U017|A0A291U017_9GAMM	complete		0.21	-2.25154	NO_SP	FALSE	FALSE
1027	861	A0A291TXW7|A0A291TXW7	8.76	18	4	4	0.333333	1.15443	3820000	1190000	3020000	1130000	27740	Ubiquinone/menaquinone biosynthesis C-methyltransferase UbiE OS=Aeromonas sp. CA23 OX=2033032 GN=ubiE PE=3 SV=1	K03183	M00117Â Ubiquinone biosynthesis, prokaryotes, chorismate (+ polyprenyl-PP) => ubiquinolÂ (9)Â Â (complete 9/9)	tr|A0A291TXW7|A0A291TXW7_9GAMM	complete		0.37	-1.4344	NO_SP	FALSE	FALSE
486	291	A0A291TWD0|A0A291TWD0	23.6	53	11	11	0.916667	7.25404	58900000	18500000	36600000	11800000	31892	1 4-dihydroxy-2-naphthoyl-CoA synthase OS=Aeromonas sp. CA23 OX=2033032 GN=menB PE=3 SV=1	K01661	M00116Â Menaquinone biosynthesis, chorismate (+ polyprenyl-PP) => menaquinolÂ (9)Â Â (complete 9/9)	tr|A0A291TWD0|A0A291TWD0_9GAMM	complete		0.32	-1.64386	NO_SP	FALSE	CORRECT
1027	861	A0A291TXW7|A0A291TXW7	8.76	18	4	4	0.333333	1.15443	3820000	1190000	3020000	1130000	27740	Ubiquinone/menaquinone biosynthesis C-methyltransferase UbiE OS=Aeromonas sp. CA23 OX=2033032 GN=ubiE PE=3 SV=1	K03183	M00116Â Menaquinone biosynthesis, chorismate (+ polyprenyl-PP) => menaquinolÂ (9)Â Â (complete 9/9)	tr|A0A291TXW7|A0A291TXW7_9GAMM	complete		0.37	-1.4344	NO_SP	FALSE	FALSE
1404	769	A0A291TWK8|A0A291TWK8	1.29	15	3	3	0.214286	0.637894	10800000	4770000	10800000	4770000	34541	o-succinylbenzoate synthase OS=Aeromonas sp. CA23 OX=2033032 GN=menC PE=3 SV=1	K02549	M00116Â Menaquinone biosynthesis, chorismate (+ polyprenyl-PP) => menaquinolÂ (9)Â Â (complete 9/9)	tr|A0A291TWK8|A0A291TWK8_9GAMM	complete		0.44	-1.18442	NO_SP	FALSE	FALSE
324	228	A0A291TVP6|A0A291TVP6	1.53	30	16	16	0.695652	3.96195	79300000	59000000	44700000	35900000	59424	Glutamine-dependent NAD(+) synthetase OS=Aeromonas sp. CA23 OX=2033032 GN=nadE PE=3 SV=1	K01950	M00115Â NAD biosynthesis, aspartate => quinolinate => NADÂ (5)Â Â (complete 5/5)	tr|A0A291TVP6|A0A291TVP6_9GAMM	complete		0.8	-0.321928	NO_SP	FALSE	FALSE
755	579	A0A291TZ38|A0A291TZ38	8.38	28	9	9	1.125	12.3352	37800000	14200000	19900000	8550000	30724	Quinolinate phosphoribosyltransferase [decarboxylating] OS=Aeromonas sp. CA23 OX=2033032 GN=CK910_07375 PE=3 SV=1	K00767	M00115Â NAD biosynthesis, aspartate => quinolinate => NADÂ (5)Â Â (complete 5/5)	tr|A0A291TZ38|A0A291TZ38_9GAMM	complete		0.43	-1.21759	NO_SP	FALSE	FALSE
1602	2490	A0A291U040|A0A291U040	9.86	17	2	2	0.181818	0.519911	739000	228000	739000	228000	23861	Probable nicotinate-nucleotide adenylyltransferase OS=Aeromonas sp. CA23 OX=2033032 GN=nadD PE=3 SV=1	K00969	M00115Â NAD biosynthesis, aspartate => quinolinate => NADÂ (5)Â Â (complete 5/5)	tr|A0A291U040|A0A291U040_9GAMM	complete		0.31	-1.68966	NO_SP	FALSE	FALSE
1800	2245	A0A291U7H2|A0A291U7H2	11.99	7	2	2	0.125	0.333521	747000	71000	747000	71000	37535	Quinolinate synthase OS=Aeromonas sp. CA23 OX=2033032 GN=CK910_08970 PE=4 SV=1	K03517	M00115Â NAD biosynthesis, aspartate => quinolinate => NADÂ (5)Â Â (complete 5/5)	tr|A0A291U7H2|A0A291U7H2_9GAMM	complete		0.1	-3.32193	NO_SP	FALSE	FALSE
860	652	A0A291U674|A0A291U674	3.35	10	3	3	0.272727	0.873817	28900000	9740000	28900000	9740000	42882	Mannose-6-phosphate isomerase OS=Aeromonas sp. CA23 OX=2033032 GN=manA PE=3 SV=1	K01809	M00114Â Ascorbate biosynthesis, plants, fructose-6P => ascorbateÂ (1)Â Â (incomplete 1/8)	tr|A0A291U674|A0A291U674_9GAMM	complete		0.34	-1.55639	NO_SP	FALSE	FALSE
1503	13539	A0A291TX01|A0A291TX01	16.81	21	3	3	0.333333	1.15443	3560000	15400000	3560000	15400000	35319	Lipase OS=Aeromonas sp. CA23 OX=2033032 GN=CK910_02475 PE=4 SV=1	K01046	M00098Â Acylglycerol degradationÂ (1)Â Â (1 block missing 1/2)	tr|A0A291TX01|A0A291TX01_9GAMM	incomplete		4.32	2.11103	NO_SP	FALSE	FALSE
769	883	A0A291U5Q4|A0A291U5Q4	21.14	24	5	5	0.277778	0.895736	32500000	1770000	24700000	1500000	42182	1-deoxy-D-xylulose 5-phosphate reductoisomerase OS=Aeromonas sp. CA23 OX=2033032 GN=dxr PE=3 SV=1	K00099	M00096Â C5 isoprenoid biosynthesis, non-mevalonate pathwayÂ (7)Â Â (1 block missing 7/8)	tr|A0A291U5Q4|A0A291U5Q4_9GAMM	incomplete		0.06	-4.05889	NO_SP	FALSE	FALSE
1087	839	A0A291TWG9|A0A291TWG9	11.67	8	3	3	0.176471	0.501311	2150000	856000	2150000	856000	34111	4-hydroxy-3-methylbut-2-enyl diphosphate reductase OS=Aeromonas sp. CA23 OX=2033032 GN=ispH PE=3 SV=1	K03527	M00096Â C5 isoprenoid biosynthesis, non-mevalonate pathwayÂ (7)Â Â (1 block missing 7/8)	tr|A0A291TWG9|A0A291TWG9_9GAMM	incomplete		0.4	-1.32193	NO_SP	FALSE	FALSE
1111	780	A0A291U0R0|A0A291U0R0	3.34	21	4	4	0.444444	1.78256	6910000	2560000	6430000	2490000	31744	4-diphosphocytidyl-2-C-methyl-D-erythritol kinase OS=Aeromonas sp. CA23 OX=2033032 GN=ispE PE=3 SV=1	K00919	M00096Â C5 isoprenoid biosynthesis, non-mevalonate pathwayÂ (7)Â Â (1 block missing 7/8)	tr|A0A291U0R0|A0A291U0R0_9GAMM	incomplete		0.39	-1.35845	NO_SP	FALSE	FALSE
1124	1233	A0A291TVT2|A0A291TVT2	6.42	32	5	5	0.833333	5.81292	16800000	11600000	11900000	7870000	16574	2-C-methyl-D-erythritol 2 4-cyclodiphosphate synthase OS=Aeromonas sp. CA23 OX=2033032 GN=ispF PE=3 SV=1	K01770	M00096Â C5 isoprenoid biosynthesis, non-mevalonate pathwayÂ (7)Â Â (1 block missing 7/8)	tr|A0A291TVT2|A0A291TVT2_9GAMM	incomplete		0.66	-0.599462	NO_SP	FALSE	FALSE
1415	1060	A0A291U044|A0A291U044	4.42	5	2	2	0.08	0.202264	2510000	1160000	2510000	1160000	67405	1-deoxy-D-xylulose-5-phosphate synthase OS=Aeromonas sp. CA23 OX=2033032 GN=dxs PE=3 SV=1	K01662	M00096Â C5 isoprenoid biosynthesis, non-mevalonate pathwayÂ (7)Â Â (1 block missing 7/8)	tr|A0A291U044|A0A291U044_9GAMM	incomplete		0.46	-1.12029	NO_SP	FALSE	FALSE
1418	3398	A0A291U4E8|A0A291U4E8	0	6	2	2	0.0952381	0.245197	409000	23900	409000	23900	40373	4-hydroxy-3-methylbut-2-en-1-yl diphosphate synthase (flavodoxin) OS=Aeromonas sp. CA23 OX=2033032 GN=ispG PE=3 SV=1	K03526	M00096Â C5 isoprenoid biosynthesis, non-mevalonate pathwayÂ (7)Â Â (1 block missing 7/8)	tr|A0A291U4E8|A0A291U4E8_9GAMM	incomplete		0.06	-4.05889	NO_SP	FALSE	FALSE
659	562	A0A291U712|A0A291U712	9.18	26	6	6	0.5	2.16228	80800000	57500000	71000000	52100000	31432	Phosphatidylserine decarboxylase proenzyme OS=Aeromonas sp. CA23 OX=2033032 GN=psd PE=3 SV=1	K01613	M00093Â Phosphatidylethanolamine (PE) biosynthesis, PA => PS => PEÂ (3)Â Â (complete 3/3)	tr|A0A291U712|A0A291U712_9GAMM, tr|A0A291TYJ0|A0A291TYJ0_9GAMM	complete		0.73	-0.454032	NO_SP	FALSE	FALSE
686	449	A0A291TXJ9|A0A291TXJ9	3.31	21	7	7	0.269231	0.858792	16600000	12700000	12200000	11900000	52705	Phosphatidylserine synthase OS=Aeromonas sp. CA23 OX=2033032 GN=pssA PE=3 SV=1	K00998	M00093Â Phosphatidylethanolamine (PE) biosynthesis, PA => PS => PEÂ (3)Â Â (complete 3/3)	tr|A0A291TXJ9|A0A291TXJ9_9GAMM	complete		0.97	-0.0439433	NO_SP	FALSE	FALSE
708	641	A0A291TYJ0|A0A291TYJ0	26.38	25	8	8	0.533333	2.41455	35700000	8900000	28400000	7390000	50678	Phosphatidylserine decarboxylase OS=Aeromonas sp. CA23 OX=2033032 GN=CK910_06135 PE=4 SV=1	K01613	M00093Â Phosphatidylethanolamine (PE) biosynthesis, PA => PS => PEÂ (3)Â Â (complete 3/3)	tr|A0A291U712|A0A291U712_9GAMM, tr|A0A291TYJ0|A0A291TYJ0_9GAMM	complete		0.26	-1.94342	NO_SP	FALSE	CORRECT
134	307	A0A291U619|A0A291U619	2.92	29	18	17	0.409091	1.56502	37500000	46700000	26000000	31400000	84389	Acyl-coenzyme A dehydrogenase OS=Aeromonas sp. CA23 OX=2033032 GN=CK910_21380 PE=3 SV=1	K06445	M00087Â beta-OxidationÂ (4)Â Â (complete 3/3)	tr|A0A291U619|A0A291U619_9GAMM, tr|A0A291U4X0|A0A291U4X0_9GAMM	complete		1.21	0.275007	NO_SP	FALSE	FALSE
152	95	A0A291TXM0|A0A291TXM0	6.64	41	23	23	0.766667	4.84341	195000000	324000000	67400000	164000000	76590	Fatty acid oxidation complex subunit alpha OS=Aeromonas sp. CA23 OX=2033032 GN=fadB PE=3 SV=1	K01825	M00087Â beta-OxidationÂ (4)Â Â (complete 3/3)	tr|A0A291TXM0|A0A291TXM0_9GAMM	complete		2.44	1.28688	NO_SP	FALSE	FALSE
565	500	A0A291U3P8|A0A291U3P8	2.31	11	7	7	0.225806	0.681924	13700000	6420000	11600000	5120000	76058	Fatty acid oxidation complex subunit alpha FadJ OS=Aeromonas sp. CA23 OX=2033032 GN=fadJ PE=3 SV=1	K01782	M00087Â beta-OxidationÂ (4)Â Â (complete 3/3)	tr|A0A291U3P8|A0A291U3P8_9GAMM	complete		0.44	-1.18442	NO_SP	FALSE	FALSE
961	618	A0A291U4X0|A0A291U4X0	4.91	8	6	5	0.15	0.412538	10700000	13200000	9060000	12000000	89986	Acyl-coenzyme A dehydrogenase OS=Aeromonas sp. CA23 OX=2033032 GN=fadE PE=3 SV=1	K06445	M00087Â beta-OxidationÂ (4)Â Â (complete 3/3)	tr|A0A291U619|A0A291U619_9GAMM, tr|A0A291U4X0|A0A291U4X0_9GAMM	complete		1.33	0.411426	NO_SP	FALSE	FALSE
1071	4924	A0A291TXV4|A0A291TXV4	10.74	10	3	3	0.2	0.584893	1400000	4140000	1400000	4140000	40963	3-ketoacyl-CoA thiolase OS=Aeromonas sp. CA23 OX=2033032 GN=fadA PE=3 SV=1	K00632	M00087Â beta-OxidationÂ (4)Â Â (complete 3/3)	tr|A0A291TXV4|A0A291TXV4_9GAMM, tr|A0A291U3J5|A0A291U3J5_9GAMM	complete		2.96	1.5656	NO_SP	FALSE	FALSE
1102	5373	A0A291U3J5|A0A291U3J5	0	12	3	3	0.157895	0.43845	32100	1070000	32100	1070000	46330	3-ketoacyl-CoA thiolase OS=Aeromonas sp. CA23 OX=2033032 GN=fadI PE=3 SV=1	K00632	M00087Â beta-OxidationÂ (4)Â Â (complete 3/3)	tr|A0A291TXV4|A0A291TXV4_9GAMM, tr|A0A291U3J5|A0A291U3J5_9GAMM	complete		33.37	5.06048	NO_SP	FALSE	FALSE
110	58	A0A291U2K9|A0A291U2K9	0.29	62	33	33	1.43478	26.2134	488000000	490000000	300000000	295000000	61647	AMP-dependent synthetase OS=Aeromonas sp. CA23 OX=2033032 GN=CK910_15330 PE=4 SV=1	K01897	M00086Â beta-Oxidation, acyl-CoA synthesisÂ (1)Â Â (complete 1/1)	tr|A0A291U0K0|A0A291U0K0_9GAMM, tr|A0A291TVY2|A0A291TVY2_9GAMM, tr|A0A291U2K9|A0A291U2K9_9GAMM	complete		0.98	-0.0291463	NO_SP	FALSE	FALSE
203	191	A0A291U2C4|A0A291U2C4	0.37	51	19	19	1.11765	12.1113	312000000	172000000	142000000	79000000	42701	Beta-ketoacyl-[acyl-carrier-protein] synthase I OS=Aeromonas sp. CA23 OX=2033032 GN=CK910_15480 PE=3 SV=1	K00647	M00083Â Fatty acid biosynthesis, elongationÂ (6)Â Â (complete 1/1)	tr|A0A291U072|A0A291U072_9GAMM, tr|A0A291U2C4|A0A291U2C4_9GAMM	complete		0.56	-0.836501	NO_SP	FALSE	FALSE
271	147	A0A291U288|A0A291U288	0.2	49	16	16	0.842105	5.95193	197000000	119000000	116000000	71700000	43475	Enoyl-[acyl-carrier-protein] reductase [NADH] OS=Aeromonas sp. CA23 OX=2033032 GN=fabV PE=3 SV=1	K00209	M00083Â Fatty acid biosynthesis, elongationÂ (6)Â Â (complete 1/1)	tr|A0A291U288|A0A291U288_9GAMM, tr|A0A291TXP7|A0A291TXP7_9GAMM	complete		0.62	-0.68966	NO_SP	FALSE	FALSE
445	544	A0A291U3M5|A0A291U3M5	0.13	39	8	8	1	9	191000000	172000000	158000000	137000000	25718	3-oxoacyl-[acyl-carrier-protein] reductase OS=Aeromonas sp. CA23 OX=2033032 GN=fabG PE=3 SV=1	K00059	M00083Â Fatty acid biosynthesis, elongationÂ (6)Â Â (complete 1/1)	tr|A0A291U3M5|A0A291U3M5_9GAMM, tr|A0A291TYJ5|A0A291TYJ5_9GAMM, tr|A0A291TZY5|A0A291TZY5_9GAMM, tr|A0A291U481|A0A291U481_9GAMM	complete		0.87	-0.200913	NO_SP	FALSE	FALSE
549	728	A0A291U481|A0A291U481	10.48	49	9	9	0.75	4.62341	34600000	108000000	27200000	76600000	26483	3-oxoacyl-ACP reductase OS=Aeromonas sp. CA23 OX=2033032 GN=fabG PE=4 SV=1	K00059	M00083Â Fatty acid biosynthesis, elongationÂ (6)Â Â (complete 1/1)	tr|A0A291U3M5|A0A291U3M5_9GAMM, tr|A0A291TYJ5|A0A291TYJ5_9GAMM, tr|A0A291TZY5|A0A291TZY5_9GAMM, tr|A0A291U481|A0A291U481_9GAMM	complete		2.82	1.4957	NO_SP	FALSE	FALSE
676	1461	A0A291U6J4|A0A291U6J4	7.21	36	8	8	1.6	38.8107	170000000	29400000	149000000	29000000	17096	3-hydroxyacyl-[acyl-carrier-protein] dehydratase FabZ OS=Aeromonas sp. CA23 OX=2033032 GN=fabZ PE=3 SV=1	K02372	M00083Â Fatty acid biosynthesis, elongationÂ (6)Â Â (complete 1/1)	tr|A0A291U6J4|A0A291U6J4_9GAMM	complete		0.2	-2.32193	NO_SP	FALSE	FALSE
729	464	A0A291U2X6|A0A291U2X6	2.36	45	9	9	1.28571	18.307	44600000	45400000	33300000	38300000	20300	3-hydroxydecanoyl-[acyl-carrier-protein] dehydratase OS=Aeromonas sp. CA23 OX=2033032 GN=fabA PE=3 SV=1	K01716	M00083Â Fatty acid biosynthesis, elongationÂ (6)Â Â (complete 1/1)	tr|A0A291U2X6|A0A291U2X6_9GAMM	complete		1.15	0.201634	NO_SP	FALSE	FALSE
1331	1107	A0A291TYJ5|A0A291TYJ5	9.12	18	4	4	0.363636	1.31013	5550000	7180000	4860000	6370000	25966	3-oxoacyl-ACP reductase OS=Aeromonas sp. CA23 OX=2033032 GN=CK910_05700 PE=4 SV=1	K00059	M00083Â Fatty acid biosynthesis, elongationÂ (6)Â Â (complete 1/1)	tr|A0A291U3M5|A0A291U3M5_9GAMM, tr|A0A291TYJ5|A0A291TYJ5_9GAMM, tr|A0A291TZY5|A0A291TZY5_9GAMM, tr|A0A291U481|A0A291U481_9GAMM	complete		1.31	0.389567	NO_SP	FALSE	FALSE
1377	1356	A0A291U392|A0A291U392	1.66	11	2	2	0.142857	0.389495	8490000	4730000	7550000	4730000	43115	3-oxoacyl-[acyl-carrier-protein] synthase 2 OS=Aeromonas sp. CA23 OX=2033032 GN=fabF PE=3 SV=1	K09458	M00083Â Fatty acid biosynthesis, elongationÂ (6)Â Â (complete 1/1)	tr|A0A291U0E4|A0A291U0E4_9GAMM, tr|A0A291U392|A0A291U392_9GAMM	complete		0.63	-0.666576	NO_SP	FALSE	FALSE
1384	984	A0A291TZY5|A0A291TZY5	21.72	15	3	3	0.3	0.995262	8680000	3540000	8680000	3540000	25339	3-oxoacyl-ACP reductase FabG OS=Aeromonas sp. CA23 OX=2033032 GN=CK910_10130 PE=4 SV=1	K00059	M00083Â Fatty acid biosynthesis, elongationÂ (6)Â Â (complete 1/1)	tr|A0A291U3M5|A0A291U3M5_9GAMM, tr|A0A291TYJ5|A0A291TYJ5_9GAMM, tr|A0A291TZY5|A0A291TZY5_9GAMM, tr|A0A291U481|A0A291U481_9GAMM	complete		0.41	-1.2863	NO_SP	FALSE	FALSE
220	197	A0A291U6Y6|A0A291U6Y6	0.93	55	13	13	0.866667	6.35642	93200000	98200000	57300000	55700000	35263	Acetyl-coenzyme A carboxylase carboxyl transferase subunit alpha OS=Aeromonas sp. CA23 OX=2033032 GN=accA PE=3 SV=1	K01962	M00082Â Fatty acid biosynthesis, initiationÂ (6)Â Â (complete 2/2)	tr|A0A291U6Y6|A0A291U6Y6_9GAMM	complete		0.97	-0.0439433	NO_SP	FALSE	FALSE
293	428	A0A291U071|A0A291U071	2.33	27	15	15	0.681818	3.80638	71000000	98000000	57500000	74300000	48962	Biotin carboxylase OS=Aeromonas sp. CA23 OX=2033032 GN=accC PE=4 SV=1	K01961	M00082Â Fatty acid biosynthesis, initiationÂ (6)Â Â (complete 2/2)	tr|A0A291U071|A0A291U071_9GAMM	complete		1.29	0.367371	NO_SP	FALSE	FALSE
327	216	A0A291U3A8|A0A291U3A8	7.63	50	10	10	1.11111	11.9155	184000000	72100000	136000000	52700000	32727	Malonyl CoA-acyl carrier protein transacylase OS=Aeromonas sp. CA23 OX=2033032 GN=fabD PE=3 SV=1	K00645	M00082Â Fatty acid biosynthesis, initiationÂ (6)Â Â (complete 2/2)	tr|A0A291U3A8|A0A291U3A8_9GAMM	complete		0.39	-1.35845	NO_SP	FALSE	FALSE
673	2103	A0A291U0I0|A0A291U0I0	3.17	61	3	3	0.75	4.62341	391000000	330000000	316000000	257000000	16122	Biotin carboxyl carrier protein of acetyl-CoA carboxylase OS=Aeromonas sp. CA23 OX=2033032 GN=accB PE=4 SV=1	K02160	M00082Â Fatty acid biosynthesis, initiationÂ (6)Â Â (complete 2/2)	tr|A0A291U0I0|A0A291U0I0_9GAMM	complete		0.81	-0.304006	NO_SP	FALSE	FALSE
746	672	A0A291U2S2|A0A291U2S2	2.51	35	9	9	0.6	2.98107	27100000	34100000	20900000	25800000	31761	Acetyl-coenzyme A carboxylase carboxyl transferase subunit beta OS=Aeromonas sp. CA23 OX=2033032 GN=accD PE=3 SV=1	K01963	M00082Â Fatty acid biosynthesis, initiationÂ (6)Â Â (complete 2/2)	tr|A0A291U2S2|A0A291U2S2_9GAMM	complete		1.24	0.31034	NO_SP	FALSE	FALSE
775	517	A0A291U3U5|A0A291U3U5	2.23	33	9	9	1	9	36500000	36900000	30000000	29800000	33494	3-oxoacyl-[acyl-carrier-protein] synthase 3 OS=Aeromonas sp. CA23 OX=2033032 GN=fabH PE=3 SV=1	K00648	M00082Â Fatty acid biosynthesis, initiationÂ (6)Â Â (complete 2/2)	tr|A0A291U3U5|A0A291U3U5_9GAMM, tr|A0A291U714|A0A291U714_9GAMM	complete		0.99	-0.0144996	NO_SP	FALSE	FALSE
1195	632	A0A291U714|A0A291U714	2.85	17	4	4	0.333333	1.15443	10800000	5670000	6100000	4700000	38520	3-oxoacyl-[acyl-carrier-protein] synthase 3 OS=Aeromonas sp. CA23 OX=2033032 GN=fabH PE=3 SV=1	K00648	M00082Â Fatty acid biosynthesis, initiationÂ (6)Â Â (complete 2/2)	tr|A0A291U3U5|A0A291U3U5_9GAMM, tr|A0A291U714|A0A291U714_9GAMM	complete		0.77	-0.37707	NO_SP	FALSE	FALSE
988	595	A0A291U5Q0|A0A291U5Q0	0.25	16	5	5	0.25	0.778279	13000000	7990000	7860000	6110000	41507	Hyaluronidase OS=Aeromonas sp. CA23 OX=2033032 GN=CK910_20620 PE=4 SV=1	K01197	M00077Â Chondroitin sulfate degradationÂ (1)Â Â (incomplete 1/4)	tr|A0A291U5Q0|A0A291U5Q0_9GAMM	complete	GH84.hmm	0.78	-0.358454	NO_SP	FALSE	FALSE
988	595	A0A291U5Q0|A0A291U5Q0	0.25	16	5	5	0.25	0.778279	13000000	7990000	7860000	6110000	41507	Hyaluronidase OS=Aeromonas sp. CA23 OX=2033032 GN=CK910_20620 PE=4 SV=1	K01197	M00077Â Chondroitin sulfate degradationÂ (1)Â Â (incomplete 1/4)	tr|A0A291U5Q0|A0A291U5Q0_9GAMM	complete	GH29.hmm	0.78	-0.358454	NO_SP	FALSE	FALSE
988	595	A0A291U5Q0|A0A291U5Q0	0.25	16	5	5	0.25	0.778279	13000000	7990000	7860000	6110000	41507	Hyaluronidase OS=Aeromonas sp. CA23 OX=2033032 GN=CK910_20620 PE=4 SV=1	K01197	M00076Â Dermatan sulfate degradationÂ (1)Â Â (incomplete 1/5)	tr|A0A291U5Q0|A0A291U5Q0_9GAMM	complete	GH84.hmm	0.78	-0.358454	NO_SP	FALSE	FALSE
988	595	A0A291U5Q0|A0A291U5Q0	0.25	16	5	5	0.25	0.778279	13000000	7990000	7860000	6110000	41507	Hyaluronidase OS=Aeromonas sp. CA23 OX=2033032 GN=CK910_20620 PE=4 SV=1	K01197	M00076Â Dermatan sulfate degradationÂ (1)Â Â (incomplete 1/5)	tr|A0A291U5Q0|A0A291U5Q0_9GAMM	complete	GH29.hmm	0.78	-0.358454	NO_SP	FALSE	FALSE
146	69	A0A291U6V5|A0A291U6V5	12.98	77	24	24	1.2	14.8489	503000000	207000000	329000000	147000000	36277	ADP-L-glycero-D-manno-heptose-6-epimerase OS=Aeromonas sp. CA23 OX=2033032 GN=hldD PE=3 SV=1	K03274	M00064Â ADP-L-glycero-D-manno-heptose biosynthesisÂ (4)Â Â (complete 5/5)	tr|A0A291U6V5|A0A291U6V5_9GAMM	complete		0.45	-1.152	NO_SP	FALSE	FALSE
378	472	A0A291U5A7|A0A291U5A7	4.13	73	14	13	1.75	55.2341	168000000	254000000	121000000	182000000	20865	Phosphoheptose isomerase OS=Aeromonas sp. CA23 OX=2033032 GN=gmhA PE=3 SV=1	K03271	M00064Â ADP-L-glycero-D-manno-heptose biosynthesisÂ (4)Â Â (complete 5/5)	tr|A0A291U5A7|A0A291U5A7_9GAMM	complete		1.51	0.594549	NO_SP	FALSE	FALSE
412	158	A0A291TZ37|A0A291TZ37	1.7	38	15	15	0.714286	4.17947	57000000	68900000	29900000	29100000	50666	Bifunctional protein HldE OS=Aeromonas sp. CA23 OX=2033032 GN=hldE PE=3 SV=1	K03272	M00064Â ADP-L-glycero-D-manno-heptose biosynthesisÂ (4)Â Â (complete 5/5)	tr|A0A291TZ37|A0A291TZ37_9GAMM	complete		0.97	-0.0439433	NO_SP	FALSE	FALSE
1037	1632	A0A291TY47|A0A291TY47	3.58	16	4	4	0.666667	3.64159	37400000	26000000	28700000	18300000	19715	D D-heptose 1 7-bisphosphate phosphatase OS=Aeromonas sp. CA23 OX=2033032 GN=CK910_06465 PE=3 SV=1	K03273	M00064Â ADP-L-glycero-D-manno-heptose biosynthesisÂ (4)Â Â (complete 5/5)	tr|A0A291TY47|A0A291TY47_9GAMM	complete		0.64	-0.643856	NO_SP	FALSE	FALSE
264	155	A0A291U0K4|A0A291U0K4	0.98	57	14	14	0.823529	5.66085	225000000	175000000	170000000	136000000	31103	2-dehydro-3-deoxyphosphooctonate aldolase OS=Aeromonas sp. CA23 OX=2033032 GN=kdsA PE=3 SV=1	K01627	M00063Â CMP-KDO biosynthesisÂ (4)Â Â (complete 4/4)	tr|A0A291U0K4|A0A291U0K4_9GAMM	complete		0.8	-0.321928	NO_SP	FALSE	FALSE
912	614	A0A291U1J9|A0A291U1J9	15.81	25	5	5	0.416667	1.61016	68500000	42700000	66600000	39900000	27743	3-deoxy-manno-octulosonate cytidylyltransferase OS=Aeromonas sp. CA23 OX=2033032 GN=kdsB PE=3 SV=1	K00979	M00063Â CMP-KDO biosynthesisÂ (4)Â Â (complete 4/4)	tr|A0A291U1J9|A0A291U1J9_9GAMM	complete		0.6	-0.736966	NO_SP	FALSE	FALSE
984	865	A0A291TYZ2|A0A291TYZ2	14.7	20	3	3	0.5	2.16228	23900000	9240000	23900000	9240000	19606	3-deoxy-D-manno-octulosonate 8-phosphate phosphatase KdsC OS=Aeromonas sp. CA23 OX=2033032 GN=CK910_07065 PE=3 SV=1	K03270	M00063Â CMP-KDO biosynthesisÂ (4)Â Â (complete 4/4)	tr|A0A291TYZ2|A0A291TYZ2_9GAMM	complete		0.39	-1.35845	NO_SP	FALSE	FALSE
1161	1371	A0A291TYD5|A0A291TYD5	0.29	22	4	4	0.307692	1.03092	7410000	1730000	7410000	938000	35035	Arabinose 5-phosphate isomerase OS=Aeromonas sp. CA23 OX=2033032 GN=CK910_07060 PE=3 SV=1	K06041	M00063Â CMP-KDO biosynthesisÂ (4)Â Â (complete 4/4)	tr|A0A291TYD5|A0A291TYD5_9GAMM	complete		0.13	-2.94342	NO_SP	FALSE	FALSE
876	781	A0A291TWZ9|A0A291TWZ9	12.51	48	5	5	0.555556	2.59381	48100000	16900000	45700000	16300000	21961	2-dehydro-3-deoxy-phosphogluconate aldolase OS=Aeromonas sp. CA23 OX=2033032 GN=CK910_03615 PE=3 SV=1	K01625	M00061Â D-Glucuronate degradation, D-glucuronate => pyruvate + D-glyceraldehyde 3PÂ (1)Â Â (incomplete 1/5)	tr|A0A291TWZ9|A0A291TWZ9_9GAMM	complete		0.36	-1.47393	NO_SP	FALSE	FALSE
929	788	A0A291U5Z6|A0A291U5Z6	0.87	26	5	5	0.5	2.16228	17600000	13500000	12100000	9550000	28336	Acyl-[acyl-carrier-protein]--UDP-N-acetylglucosamine O-acyltransferase OS=Aeromonas sp. CA23 OX=2033032 GN=lpxA PE=3 SV=1	K00677	M00060Â KDO2-lipid A biosynthesis, Raetz pathway, LpxL-LpxM typeÂ (9)Â Â (complete 9/9)	tr|A0A291U5Z6|A0A291U5Z6_9GAMM	complete		0.79	-0.340075	NO_SP	FALSE	FALSE
1391	928	A0A291U613|A0A291U613	2.55	9	3	3	0.157895	0.43845	22400000	15000000	22400000	15000000	42324	Lipid-A-disaccharide synthase OS=Aeromonas sp. CA23 OX=2033032 GN=lpxB PE=3 SV=1	K00748	M00060Â KDO2-lipid A biosynthesis, Raetz pathway, LpxL-LpxM typeÂ (9)Â Â (complete 9/9)	tr|A0A291U613|A0A291U613_9GAMM	complete	GT19.hmm	0.67	-0.577767	NO_SP	FALSE	FALSE
1410	1457	A0A291TZ28|A0A291TZ28	0	6	2	2	0.133333	0.359356	15900000	1180000	14500000	986000	34430	UDP-3-O-acyl-N-acetylglucosamine deacetylase OS=Aeromonas sp. CA23 OX=2033032 GN=lpxC PE=3 SV=1	K02535	M00060Â KDO2-lipid A biosynthesis, Raetz pathway, LpxL-LpxM typeÂ (9)Â Â (complete 9/9)	tr|A0A291TZ28|A0A291TZ28_9GAMM	complete	CE11.hmm	0.07	-3.8365	NO_SP	FALSE	FALSE
1432	2706	A0A291U4G9|A0A291U4G9	7	7	2	2	0.133333	0.359356	2300000	1110000	2300000	1110000	37719	Lipid A biosynthesis myristoyltransferase OS=Aeromonas sp. CA23 OX=2033032 GN=lpxM PE=3 SV=1	K02560	M00060Â KDO2-lipid A biosynthesis, Raetz pathway, LpxL-LpxM typeÂ (9)Â Â (complete 9/9)	tr|A0A291U4G9|A0A291U4G9_9GAMM, tr|A0A291U3T8|A0A291U3T8_9GAMM	complete		0.48	-1.05889	NO_SP	FALSE	FALSE
1772	2235	A0A291TXI2|A0A291TXI2	0	6	2	2	0.117647	0.311134	3210000	1280000	3210000	1280000	46234	3-deoxy-D-manno-octulosonic acid transferase OS=Aeromonas sp. CA23 OX=2033032 GN=CK910_04185 PE=3 SV=1	K02527	M00060Â KDO2-lipid A biosynthesis, Raetz pathway, LpxL-LpxM typeÂ (9)Â Â (complete 9/9)	tr|A0A291TXI2|A0A291TXI2_9GAMM	complete	GT30.hmm	0.4	-1.32193	NO_SP	FALSE	FALSE
1772	2235	A0A291TXI2|A0A291TXI2	0	6	2	2	0.117647	0.311134	3210000	1280000	3210000	1280000	46234	3-deoxy-D-manno-octulosonic acid transferase OS=Aeromonas sp. CA23 OX=2033032 GN=CK910_04185 PE=3 SV=1	K02527	M00060Â KDO2-lipid A biosynthesis, Raetz pathway, LpxL-LpxM typeÂ (9)Â Â (complete 9/9)	tr|A0A291TXI2|A0A291TXI2_9GAMM	complete	GT30.hmm	0.4	-1.32193	NO_SP	FALSE	FALSE
1772	2235	A0A291TXI2|A0A291TXI2	0	6	2	2	0.117647	0.311134	3210000	1280000	3210000	1280000	46234	3-deoxy-D-manno-octulosonic acid transferase OS=Aeromonas sp. CA23 OX=2033032 GN=CK910_04185 PE=3 SV=1	K02527	M00060Â KDO2-lipid A biosynthesis, Raetz pathway, LpxL-LpxM typeÂ (9)Â Â (complete 9/9)	tr|A0A291TXI2|A0A291TXI2_9GAMM	complete	GT28.hmm	0.4	-1.32193	NO_SP	FALSE	FALSE
168	111	A0A291U3J4|A0A291U3J4	13.51	29	21	21	0.525	2.34965	108000000	11900000	40800000	4930000	86437	Ribonucleoside-diphosphate reductase OS=Aeromonas sp. CA23 OX=2033032 GN=CK910_16380 PE=3 SV=1	K00525	M00053Â Deoxyribonucleotide biosynthesis, ADP/GDP/CDP/UDP => dATP/dGTP/dCTP/dUTPÂ (3)Â Â (complete 2/2)	tr|A0A291U3J4|A0A291U3J4_9GAMM, tr|A0A291TVS2|A0A291TVS2_9GAMM	complete		0.12	-3.05889	NO_SP	FALSE	FALSE
379	590	A0A291U4E6|A0A291U4E6	3.41	82	10	10	1.42857	25.827	548000000	408000000	323000000	262000000	15440	Nucleoside diphosphate kinase OS=Aeromonas sp. CA23 OX=2033032 GN=ndk PE=3 SV=1	K00940	M00053Â Deoxyribonucleotide biosynthesis, ADP/GDP/CDP/UDP => dATP/dGTP/dCTP/dUTPÂ (3)Â Â (complete 2/2)	tr|A0A291U4E6|A0A291U4E6_9GAMM	complete		0.81	-0.304006	NO_SP	FALSE	FALSE
899	555	A0A291U2T2|A0A291U2T2	10.19	19	4	4	0.266667	0.84785	19000000	944000	16800000	944000	43167	Ribonucleoside-diphosphate reductase OS=Aeromonas sp. CA23 OX=2033032 GN=CK910_16375 PE=3 SV=1	K00526	M00053Â Deoxyribonucleotide biosynthesis, ADP/GDP/CDP/UDP => dATP/dGTP/dCTP/dUTPÂ (3)Â Â (complete 2/2)	tr|A0A291U2T2|A0A291U2T2_9GAMM	complete		0.06	-4.05889	NO_SP	FALSE	FALSE
1061	726	A0A291TVS2|A0A291TVS2	1.74	9	3	3	0.0882353	0.22528	9510000	242000	9510000	242000	79401	Vitamin B12-dependent ribonucleotide reductase OS=Aeromonas sp. CA23 OX=2033032 GN=CK910_00620 PE=3 SV=1	K00525	M00053Â Deoxyribonucleotide biosynthesis, ADP/GDP/CDP/UDP => dATP/dGTP/dCTP/dUTPÂ (3)Â Â (complete 2/2)	tr|A0A291U3J4|A0A291U3J4_9GAMM, tr|A0A291TVS2|A0A291TVS2_9GAMM	complete		0.03	-5.05889	NO_SP	FALSE	FALSE
292	229	A0A291U623|A0A291U623	4.4	59	11	11	0.846154	6.01704	349000000	154000000	218000000	106000000	26320	Uridylate kinase OS=Aeromonas sp. CA23 OX=2033032 GN=pyrH PE=3 SV=1	K09903	M00052Â Pyrimidine ribonucleotide biosynthesis, UMP => UDP/UTP,CDP/CTPÂ (3)Â Â (complete 3/3)	tr|A0A291U623|A0A291U623_9GAMM	complete		0.49	-1.02915	NO_SP	FALSE	FALSE
379	590	A0A291U4E6|A0A291U4E6	3.41	82	10	10	1.42857	25.827	548000000	408000000	323000000	262000000	15440	Nucleoside diphosphate kinase OS=Aeromonas sp. CA23 OX=2033032 GN=ndk PE=3 SV=1	K00940	M00052Â Pyrimidine ribonucleotide biosynthesis, UMP => UDP/UTP,CDP/CTPÂ (3)Â Â (complete 3/3)	tr|A0A291U4E6|A0A291U4E6_9GAMM	complete		0.81	-0.304006	NO_SP	FALSE	FALSE
564	673	A0A291TVP5|A0A291TVP5	2.83	15	7	7	0.28	0.905461	13600000	16400000	11300000	13100000	59914	CTP synthase OS=Aeromonas sp. CA23 OX=2033032 GN=pyrG PE=3 SV=1	K01937	M00052Â Pyrimidine ribonucleotide biosynthesis, UMP => UDP/UTP,CDP/CTPÂ (3)Â Â (complete 3/3)	tr|A0A291TVP5|A0A291TVP5_9GAMM	complete		1.16	0.214125	NO_SP	FALSE	FALSE
273	195	A0A291U1V0|A0A291U1V0	1.01	17	19	19	0.387755	1.44205	105000000	64400000	71900000	45400000	117812	Carbamoyl-phosphate synthase large chain OS=Aeromonas sp. CA23 OX=2033032 GN=carB PE=3 SV=1	K01955	M00051Â De novo pyrimidine biosynthesis, glutamine (+ PRPP) => UMPÂ (8)Â Â (complete 3/3)	tr|A0A291U1V0|A0A291U1V0_9GAMM	complete		0.63	-0.666576	NO_SP	FALSE	FALSE
277	280	A0A291U264|A0A291U264	14.38	50	13	13	1.08333	11.1153	217000000	81600000	149000000	66500000	41635	Carbamoyl-phosphate synthase small chain OS=Aeromonas sp. CA23 OX=2033032 GN=carA PE=3 SV=1	K01956	M00051Â De novo pyrimidine biosynthesis, glutamine (+ PRPP) => UMPÂ (8)Â Â (complete 3/3)	tr|A0A291U264|A0A291U264_9GAMM	complete		0.45	-1.152	NO_SP	FALSE	FALSE
380	266	A0A291U363|A0A291U363	28.67	45	17	17	0.944444	7.79923	179000000	46800000	98400000	28400000	36360	Dihydroorotate dehydrogenase (quinone) OS=Aeromonas sp. CA23 OX=2033032 GN=pyrD PE=3 SV=1	K00254	M00051Â De novo pyrimidine biosynthesis, glutamine (+ PRPP) => UMPÂ (8)Â Â (complete 3/3)	tr|A0A291U363|A0A291U363_9GAMM	complete		0.29	-1.78588	NO_SP	FALSE	CORRECT
449	530	A0A291TXW5|A0A291TXW5	8.14	32	6	6	0.545455	2.51119	121000000	42000000	95900000	32800000	23818	Orotate phosphoribosyltransferase OS=Aeromonas sp. CA23 OX=2033032 GN=pyrE PE=3 SV=1	K00762	M00051Â De novo pyrimidine biosynthesis, glutamine (+ PRPP) => UMPÂ (8)Â Â (complete 3/3)	tr|A0A291TXW5|A0A291TXW5_9GAMM	complete		0.34	-1.55639	NO_SP	FALSE	FALSE
546	320	A0A291U2A0|A0A291U2A0	4.92	32	9	9	0.5	2.16228	30200000	35000000	18000000	27700000	49455	Dihydroorotase OS=Aeromonas sp. CA23 OX=2033032 GN=CK910_14715 PE=3 SV=1	K01465	M00051Â De novo pyrimidine biosynthesis, glutamine (+ PRPP) => UMPÂ (8)Â Â (complete 3/3)	tr|A0A291U2A0|A0A291U2A0_9GAMM, tr|A0A291TYS7|A0A291TYS7_9GAMM	complete	CE9.hmm	1.54	0.62293	NO_SP	FALSE	FALSE
546	320	A0A291U2A0|A0A291U2A0	4.92	32	9	9	0.5	2.16228	30200000	35000000	18000000	27700000	49455	Dihydroorotase OS=Aeromonas sp. CA23 OX=2033032 GN=CK910_14715 PE=3 SV=1	K01465	M00051Â De novo pyrimidine biosynthesis, glutamine (+ PRPP) => UMPÂ (8)Â Â (complete 3/3)	tr|A0A291U2A0|A0A291U2A0_9GAMM, tr|A0A291TYS7|A0A291TYS7_9GAMM	complete	CE9.hmm	1.54	0.62293	NO_SP	FALSE	FALSE
1055	727	A0A291TYH2|A0A291TYH2	7.6	23	5	5	0.294118	0.968419	9610000	2420000	9030000	2420000	34431	Aspartate carbamoyltransferase OS=Aeromonas sp. CA23 OX=2033032 GN=pyrB PE=3 SV=1	K00609	M00051Â De novo pyrimidine biosynthesis, glutamine (+ PRPP) => UMPÂ (8)Â Â (complete 3/3)	tr|A0A291TYH2|A0A291TYH2_9GAMM	complete		0.27	-1.88897	NO_SP	FALSE	FALSE
1187	742	A0A291U4L8|A0A291U4L8	1.76	31	6	6	0.6	2.98107	12200000	8400000	8120000	5450000	24786	Orotidine 5'-phosphate decarboxylase OS=Aeromonas sp. CA23 OX=2033032 GN=pyrF PE=3 SV=1	K01591	M00051Â De novo pyrimidine biosynthesis, glutamine (+ PRPP) => UMPÂ (8)Â Â (complete 3/3)	tr|A0A291U4L8|A0A291U4L8_9GAMM	complete		0.67	-0.577767	NO_SP	FALSE	FALSE
1464	2736	A0A291TY86|A0A291TY86	12.32	22	3	3	0.428571	1.6827	8610000	3490000	8610000	3490000	17456	Aspartate carbamoyltransferase regulatory chain OS=Aeromonas sp. CA23 OX=2033032 GN=pyrI PE=3 SV=1	K00610	M00051Â De novo pyrimidine biosynthesis, glutamine (+ PRPP) => UMPÂ (8)Â Â (complete 3/3)	tr|A0A291TY86|A0A291TY86_9GAMM	complete		0.4	-1.32193	NO_SP	FALSE	FALSE
79	71	A0A291U4Q3|A0A291U4Q3	2.02	49	21	21	0.807692	5.42233	296000000	164000000	168000000	97500000	58411	GMP synthase [glutamine-hydrolyzing] OS=Aeromonas sp. CA23 OX=2033032 GN=guaA PE=3 SV=1	K01951	M00050Â Guanine ribonucleotide biosynthesis, IMP => GDP,GTPÂ (4)Â Â (complete 4/4)	tr|A0A291U4Q3|A0A291U4Q3_9GAMM	complete		0.58	-0.785875	NO_SP	FALSE	FALSE
379	590	A0A291U4E6|A0A291U4E6	3.41	82	10	10	1.42857	25.827	548000000	408000000	323000000	262000000	15440	Nucleoside diphosphate kinase OS=Aeromonas sp. CA23 OX=2033032 GN=ndk PE=3 SV=1	K00940	M00050Â Guanine ribonucleotide biosynthesis, IMP => GDP,GTPÂ (4)Â Â (complete 4/4)	tr|A0A291U4E6|A0A291U4E6_9GAMM	complete		0.81	-0.304006	NO_SP	FALSE	FALSE
974	1358	A0A291U423|A0A291U423	21.14	8	3	3	0.157895	0.43845	8500000	1880000	8500000	1880000	51605	Inosine-5'-monophosphate dehydrogenase OS=Aeromonas sp. CA23 OX=2033032 GN=guaB PE=3 SV=1	K00088	M00050Â Guanine ribonucleotide biosynthesis, IMP => GDP,GTPÂ (4)Â Â (complete 4/4)	tr|A0A291U423|A0A291U423_9GAMM	complete		0.22	-2.18442	NO_SP	FALSE	FALSE
1172	550	A0A291TX87|A0A291TX87	1.44	26	5	5	0.454545	1.84804	14200000	14000000	12400000	11400000	23389	Guanylate kinase OS=Aeromonas sp. CA23 OX=2033032 GN=gmk PE=3 SV=1	K00942	M00050Â Guanine ribonucleotide biosynthesis, IMP => GDP,GTPÂ (4)Â Â (complete 4/4)	tr|A0A291TX87|A0A291TX87_9GAMM	complete		0.92	-0.120294	NO_SP	FALSE	FALSE
107	17	A0A291U143|A0A291U143	1.01	78	28	28	1.55556	34.9381	1070000000	798000000	468000000	337000000	45242	Adenylosuccinate synthetase OS=Aeromonas sp. CA23 OX=2033032 GN=purA PE=3 SV=1	K01939	M00049Â Adenine ribonucleotide biosynthesis, IMP => ADP,ATPÂ (4)Â Â (complete 4/4)	tr|A0A291U143|A0A291U143_9GAMM	complete		0.72	-0.473931	NO_SP	FALSE	FALSE
172	90	A0A291U5J2|A0A291U5J2	13.22	58	23	23	1.15	13.1254	258000000	151000000	116000000	56000000	51160	Adenylosuccinate lyase OS=Aeromonas sp. CA23 OX=2033032 GN=CK910_20995 PE=3 SV=1	K01756	M00049Â Adenine ribonucleotide biosynthesis, IMP => ADP,ATPÂ (4)Â Â (complete 4/4)	tr|A0A291U5J2|A0A291U5J2_9GAMM	complete		0.48	-1.05889	NO_SP	FALSE	FALSE
177	337	A0A291U463|A0A291U463	4.99	62	14	14	1	9	715000000	472000000	505000000	340000000	23096	Adenylate kinase OS=Aeromonas sp. CA23 OX=2033032 GN=adk PE=3 SV=1	K00939	M00049Â Adenine ribonucleotide biosynthesis, IMP => ADP,ATPÂ (4)Â Â (complete 4/4)	tr|A0A291U463|A0A291U463_9GAMM	complete		0.67	-0.577767	NO_SP	FALSE	FALSE
379	590	A0A291U4E6|A0A291U4E6	3.41	82	10	10	1.42857	25.827	548000000	408000000	323000000	262000000	15440	Nucleoside diphosphate kinase OS=Aeromonas sp. CA23 OX=2033032 GN=ndk PE=3 SV=1	K00940	M00049Â Adenine ribonucleotide biosynthesis, IMP => ADP,ATPÂ (4)Â Â (complete 4/4)	tr|A0A291U4E6|A0A291U4E6_9GAMM	complete		0.81	-0.304006	NO_SP	FALSE	FALSE
112	64	A0A291TVB5|A0A291TVB5	7.78	48	24	24	1	9	305000000	90600000	117000000	59100000	56669	Bifunctional purine biosynthesis protein PurH OS=Aeromonas sp. CA23 OX=2033032 GN=purH PE=3 SV=1	K00602	M00048Â De novo purine biosynthesis, PRPP + glutamine => IMPÂ (9)Â Â (1 block missing 7/8)	tr|A0A291TVB5|A0A291TVB5_9GAMM	incomplete		0.5	-1	NO_SP	FALSE	FALSE
172	90	A0A291U5J2|A0A291U5J2	13.22	58	23	23	1.15	13.1254	258000000	151000000	116000000	56000000	51160	Adenylosuccinate lyase OS=Aeromonas sp. CA23 OX=2033032 GN=CK910_20995 PE=3 SV=1	K01756	M00048Â De novo purine biosynthesis, PRPP + glutamine => IMPÂ (9)Â Â (1 block missing 7/8)	tr|A0A291U5J2|A0A291U5J2_9GAMM	incomplete		0.48	-1.05889	NO_SP	FALSE	FALSE
186	130	A0A291U780|A0A291U780	7.52	56	17	17	0.772727	4.92553	516000000	222000000	340000000	124000000	41606	Phosphoribosylaminoimidazole-succinocarboxamide synthase OS=Aeromonas sp. CA23 OX=2033032 GN=purC PE=3 SV=1	K01923	M00048Â De novo purine biosynthesis, PRPP + glutamine => IMPÂ (9)Â Â (1 block missing 7/8)	tr|A0A291U780|A0A291U780_9GAMM	incomplete		0.37	-1.4344	NO_SP	FALSE	FALSE
306	164	A0A291U1S7|A0A291U1S7	2.15	68	17	16	1.54545	34.1119	296000000	129000000	233000000	98000000	36668	Phosphoribosylformylglycinamidine cyclo-ligase OS=Aeromonas sp. CA23 OX=2033032 GN=purM PE=3 SV=1	K01933	M00048Â De novo purine biosynthesis, PRPP + glutamine => IMPÂ (9)Â Â (1 block missing 7/8)	tr|A0A291U1S7|A0A291U1S7_9GAMM	incomplete		0.42	-1.25154	NO_SP	FALSE	FALSE
308	200	A0A291TVR9|A0A291TVR9	11.56	37	14	14	0.823529	5.66085	143000000	16800000	82900000	11300000	45513	Phosphoribosylamine--glycine ligase OS=Aeromonas sp. CA23 OX=2033032 GN=purD PE=3 SV=1	K01945	M00048Â De novo purine biosynthesis, PRPP + glutamine => IMPÂ (9)Â Â (1 block missing 7/8)	tr|A0A291TVR9|A0A291TVR9_9GAMM	incomplete		0.14	-2.8365	NO_SP	FALSE	FALSE
505	576	A0A291TX68|A0A291TX68	3.93	80	8	8	1.14286	12.895	434000000	373000000	201000000	291000000	17293	N5-carboxyaminoimidazole ribonucleotide mutase OS=Aeromonas sp. CA23 OX=2033032 GN=purE PE=3 SV=1	K01588	M00048Â De novo purine biosynthesis, PRPP + glutamine => IMPÂ (9)Â Â (1 block missing 7/8)	tr|A0A291TX68|A0A291TX68_9GAMM	incomplete		1.45	0.536053	NO_SP	FALSE	FALSE
614	380	A0A291U4F9|A0A291U4F9	0.48	25	6	6	0.272727	0.873817	14800000	12300000	13100000	9510000	42131	Formate-dependent phosphoribosylglycinamide formyltransferase OS=Aeromonas sp. CA23 OX=2033032 GN=purT PE=3 SV=1	K08289	M00048Â De novo purine biosynthesis, PRPP + glutamine => IMPÂ (9)Â Â (1 block missing 7/8)	tr|A0A291U4F9|A0A291U4F9_9GAMM	incomplete		0.73	-0.454032	NO_SP	FALSE	FALSE
1274	1020	A0A291U6Y7|A0A291U6Y7	8.64	10	4	4	0.190476	0.550516	10000000	4190000	9520000	3860000	52114	Dihydropyrimidinase OS=Aeromonas sp. CA23 OX=2033032 GN=hydA PE=3 SV=1	K01464	M00046Â Pyrimidine degradation, uracil => beta-alanine, thymine => 3-aminoisobutanoateÂ (1)Â Â (2 blocks missing 1/3)	tr|A0A291U6Y7|A0A291U6Y7_9GAMM	incomplete	CE9.hmm	0.41	-1.2863	NO_SP	FALSE	FALSE
1274	1020	A0A291U6Y7|A0A291U6Y7	8.64	10	4	4	0.190476	0.550516	10000000	4190000	9520000	3860000	52114	Dihydropyrimidinase OS=Aeromonas sp. CA23 OX=2033032 GN=hydA PE=3 SV=1	K01464	M00046Â Pyrimidine degradation, uracil => beta-alanine, thymine => 3-aminoisobutanoateÂ (1)Â Â (2 blocks missing 1/3)	tr|A0A291U6Y7|A0A291U6Y7_9GAMM	incomplete	CE9.hmm	0.41	-1.2863	NO_SP	FALSE	FALSE
263	971	A0A291TWM6|A0A291TWM6	2.76	31	14	14	0.608696	3.06159	41700000	9860000	26800000	7640000	61873	Urocanate hydratase OS=Aeromonas sp. CA23 OX=2033032 GN=hutU PE=3 SV=1	K01712	M00045Â Histidine degradation, histidine => N-formiminoglutamate => glutamateÂ (4)Â Â (complete 4/4)	tr|A0A291TWM6|A0A291TWM6_9GAMM	complete		0.28	-1.8365	NO_SP	FALSE	FALSE
801	815	A0A291TWU6|A0A291TWU6	1.81	14	5	5	0.263158	0.832981	4010000	1430000	3370000	1360000	54164	Histidine ammonia-lyase OS=Aeromonas sp. CA23 OX=2033032 GN=hutH PE=3 SV=1	K01745	M00045Â Histidine degradation, histidine => N-formiminoglutamate => glutamateÂ (4)Â Â (complete 4/4)	tr|A0A291TWU6|A0A291TWU6_9GAMM, tr|A0A291U033|A0A291U033_9GAMM	complete		0.4	-1.32193	NO_SP	FALSE	FALSE
325	332	A0A291U1S0|A0A291U1S0	8.52	46	14	14	0.875	6.49894	102000000	252000000	64100000	150000000	43903	Homogentisate 1 2-dioxygenase OS=Aeromonas sp. CA23 OX=2033032 GN=CK910_14190 PE=3 SV=1	K00451	M00044Â Tyrosine degradation, tyrosine => homogentisateÂ (4)Â Â (1 block missing 4/5)	tr|A0A291U1S0|A0A291U1S0_9GAMM	incomplete		2.34	1.22651	NO_SP	FALSE	FALSE
1073	900	A0A291TWN5|A0A291TWN5	0.07	15	4	4	0.2	0.584893	11400000	10800000	11000000	9150000	43614	Aromatic amino acid aminotransferase OS=Aeromonas sp. CA23 OX=2033032 GN=CK910_01885 PE=3 SV=1	K00832	M00044Â Tyrosine degradation, tyrosine => homogentisateÂ (4)Â Â (1 block missing 4/5)	tr|A0A291TWN5|A0A291TWN5_9GAMM	incomplete		0.83	-0.268817	NO_SP	FALSE	FALSE
1076	658	A0A291U2G9|A0A291U2G9	1.69	18	6	6	0.3	0.995262	6340000	7010000	4770000	4460000	41146	4-hydroxyphenylpyruvate dioxygenase OS=Aeromonas sp. CA23 OX=2033032 GN=hppD PE=3 SV=1	K00457	M00044Â Tyrosine degradation, tyrosine => homogentisateÂ (4)Â Â (1 block missing 4/5)	tr|A0A291U2G9|A0A291U2G9_9GAMM	incomplete		0.94	-0.0892673	NO_SP	FALSE	FALSE
1073	900	A0A291TWN5|A0A291TWN5	0.07	15	4	4	0.2	0.584893	11400000	10800000	11000000	9150000	43614	Aromatic amino acid aminotransferase OS=Aeromonas sp. CA23 OX=2033032 GN=CK910_01885 PE=3 SV=1	K00832	M00040Â Tyrosine biosynthesis, chorismate => arogenate => tyrosineÂ (2)Â Â (1 block missing 2/3)	tr|A0A291TWN5|A0A291TWN5_9GAMM	incomplete		0.83	-0.268817	NO_SP	FALSE	FALSE
39	39	A0A291TZD1|A0A291TZD1	2.52	67	33	33	1.65	43.6684	1440000000	628000000	709000000	289000000	50367	Dihydrolipoyl dehydrogenase OS=Aeromonas sp. CA23 OX=2033032 GN=lpdA PE=3 SV=1	K00382	M00036Â Leucine degradation, leucine => acetoacetate + acetyl-CoAÂ (10)Â Â (complete 6/6)	tr|A0A291TZD1|A0A291TZD1_9GAMM	complete		0.41	-1.2863	NO_SP	FALSE	FALSE
104	105	A0A291TXS3|A0A291TXS3	7.51	61	18	18	1.2	14.8489	4730000000	1840000000	4220000000	1670000000	34350	Branched-chain-amino-acid aminotransferase OS=Aeromonas sp. CA23 OX=2033032 GN=ilvE PE=3 SV=1	K00826	M00036Â Leucine degradation, leucine => acetoacetate + acetyl-CoAÂ (10)Â Â (complete 6/6)	tr|A0A291TXS3|A0A291TXS3_9GAMM	complete		0.39	-1.35845	NO_SP	FALSE	FALSE
896	4669	A0A291U451|A0A291U451	0.4	22	6	6	0.352941	1.25393	10200000	2490000	7900000	1800000	41467	Acyl-CoA dehydrogenase OS=Aeromonas sp. CA23 OX=2033032 GN=CK910_17810 PE=3 SV=1	K00253	M00036Â Leucine degradation, leucine => acetoacetate + acetyl-CoAÂ (10)Â Â (complete 6/6)	tr|A0A291U451|A0A291U451_9GAMM	complete		0.23	-2.12029	NO_SP	FALSE	FALSE
990	615	A0A291U244|A0A291U244	14.45	27	6	6	0.4	1.51189	13700000	59300000	10000000	45700000	39092	Dihydrolipoamide acetyltransferase component of pyruvate dehydrogenase complex OS=Aeromonas sp. CA23 OX=2033032 GN=CK910_12600 PE=3 SV=1	K09699	M00036Â Leucine degradation, leucine => acetoacetate + acetyl-CoAÂ (10)Â Â (complete 6/6)	tr|A0A291U244|A0A291U244_9GAMM	complete		4.57	2.19219	NO_SP	FALSE	FALSE
1231	1359	A0A291U1N4|A0A291U1N4	1.19	8	3	3	0.272727	0.873817	3730000	4230000	3730000	4230000	35894	Alpha-ketoacid dehydrogenase subunit beta OS=Aeromonas sp. CA23 OX=2033032 GN=CK910_12595 PE=4 SV=1	K00167	M00036Â Leucine degradation, leucine => acetoacetate + acetyl-CoAÂ (10)Â Â (complete 6/6)	tr|A0A291U1N4|A0A291U1N4_9GAMM	complete		1.13	0.176323	NO_SP	FALSE	FALSE
1388	2418	A0A291U120|A0A291U120	10.15	6	2	2	0.153846	0.425103	753000	3610000	753000	3610000	40286	Pyruvate dehydrogenase E1 component subunit alpha OS=Aeromonas sp. CA23 OX=2033032 GN=pdhA PE=4 SV=1	K00166	M00036Â Leucine degradation, leucine => acetoacetate + acetyl-CoAÂ (10)Â Â (complete 6/6)	tr|A0A291U120|A0A291U120_9GAMM	complete		4.8	2.26303	NO_SP	FALSE	FALSE
119	523	A0A291U139|A0A291U139	5.01	60	26	26	1.36842	22.3572	2460000000	128000000	1510000000	57400000	41595	S-adenosylmethionine synthase OS=Aeromonas sp. CA23 OX=2033032 GN=metK PE=3 SV=1	K00789	M00035Â Methionine degradationÂ (3)Â Â (1 block missing 3/4)	tr|A0A291U139|A0A291U139_9GAMM	incomplete		0.04	-4.64386	NO_SP	FALSE	FALSE
119	523	A0A291U139|A0A291U139	5.01	60	26	26	1.36842	22.3572	2460000000	128000000	1510000000	57400000	41595	S-adenosylmethionine synthase OS=Aeromonas sp. CA23 OX=2033032 GN=metK PE=3 SV=1	K00789	M00034Â Methionine salvage pathwayÂ (5)Â Â (incomplete 4/8)	tr|A0A291U139|A0A291U139_9GAMM	complete		0.04	-4.64386	NO_SP	FALSE	FALSE
636	609	A0A291U4G3|A0A291U4G3	6.92	42	6	6	0.75	4.62341	74600000	52300000	70400000	51500000	24624	5'-methylthioadenosine/S-adenosylhomocysteine nucleosidase OS=Aeromonas sp. CA23 OX=2033032 GN=mtnN PE=3 SV=1	K01243	M00034Â Methionine salvage pathwayÂ (5)Â Â (incomplete 4/8)	tr|A0A291TVJ0|A0A291TVJ0_9GAMM, tr|A0A291U4G3|A0A291U4G3_9GAMM	complete		0.73	-0.454032	NO_SP	FALSE	FALSE
1073	900	A0A291TWN5|A0A291TWN5	0.07	15	4	4	0.2	0.584893	11400000	10800000	11000000	9150000	43614	Aromatic amino acid aminotransferase OS=Aeromonas sp. CA23 OX=2033032 GN=CK910_01885 PE=3 SV=1	K00832	M00034Â Methionine salvage pathwayÂ (5)Â Â (incomplete 4/8)	tr|A0A291TWN5|A0A291TWN5_9GAMM	complete		0.83	-0.268817	NO_SP	FALSE	FALSE
1507	2152	A0A291TYC7|A0A291TYC7	0.8	7	2	2	0.285714	0.930698	5930000	5160000	5930000	4970000	25988	Purine nucleoside phosphorylase OS=Aeromonas sp. CA23 OX=2033032 GN=CK910_06205 PE=3 SV=1	K05810	M00034Â Methionine salvage pathwayÂ (5)Â Â (incomplete 4/8)	tr|A0A291TYC7|A0A291TYC7_9GAMM	complete		0.84	-0.251539	NO_SP	FALSE	FALSE
1571	1445	A0A291TVJ0|A0A291TVJ0	3.14	5	2	2	0.2	0.584893	2360000	2660000	2360000	2660000	30260	5'-methylthioadenosine nucleosidase OS=Aeromonas sp. CA23 OX=2033032 GN=CK910_00205 PE=4 SV=1	K01243	M00034Â Methionine salvage pathwayÂ (5)Â Â (incomplete 4/8)	tr|A0A291TVJ0|A0A291TVJ0_9GAMM, tr|A0A291U4G3|A0A291U4G3_9GAMM	complete		1.13	0.176323	SP	FALSE	FALSE
73	88	A0A291U337|A0A291U337	5.33	71	24	24	1.71429	50.7947	824000000	366000000	405000000	204000000	40044	Aspartate-semialdehyde dehydrogenase OS=Aeromonas sp. CA23 OX=2033032 GN=asd PE=3 SV=1	K00133	M00033Â Ectoine biosynthesis, aspartate => ectoineÂ (2)Â Â (incomplete 2/5)	tr|A0A291U337|A0A291U337_9GAMM, tr|A0A291U2B2|A0A291U2B2_9GAMM	complete		0.5	-1	NO_SP	FALSE	FALSE
343	106	A0A291U2R2|A0A291U2R2	4.5	50	16	16	0.941176	7.73326	298000000	46700000	159000000	30500000	47986	Aspartokinase OS=Aeromonas sp. CA23 OX=2033032 GN=CK910_14850 PE=3 SV=1	K00928	M00033Â Ectoine biosynthesis, aspartate => ectoineÂ (2)Â Â (incomplete 2/5)	tr|A0A291TZ83|A0A291TZ83_9GAMM, tr|A0A291U2R2|A0A291U2R2_9GAMM	complete		0.19	-2.39593	NO_SP	FALSE	FALSE
363	204	A0A291TZ83|A0A291TZ83	2.08	44	13	13	0.619048	3.15956	171000000	119000000	146000000	105000000	44462	Aspartokinase OS=Aeromonas sp. CA23 OX=2033032 GN=CK910_08195 PE=3 SV=1	K00928	M00033Â Ectoine biosynthesis, aspartate => ectoineÂ (2)Â Â (incomplete 2/5)	tr|A0A291TZ83|A0A291TZ83_9GAMM, tr|A0A291U2R2|A0A291U2R2_9GAMM	complete		0.72	-0.473931	NO_SP	FALSE	FALSE
635	400	A0A291U2B2|A0A291U2B2	0.71	38	7	7	0.583333	2.83119	30800000	25900000	18600000	19100000	36784	Aspartate-semialdehyde dehydrogenase OS=Aeromonas sp. CA23 OX=2033032 GN=asd PE=3 SV=1	K00133	M00033Â Ectoine biosynthesis, aspartate => ectoineÂ (2)Â Â (incomplete 2/5)	tr|A0A291U337|A0A291U337_9GAMM, tr|A0A291U2B2|A0A291U2B2_9GAMM	complete		1.02	0.0285692	NO_SP	FALSE	FALSE
142	91	A0A291TWS4|A0A291TWS4	15.92	66	23	23	1.35294	21.5393	860000000	119000000	501000000	63500000	45223	Argininosuccinate synthase OS=Aeromonas sp. CA23 OX=2033032 GN=argG PE=3 SV=1	K01940	M00029Â Urea cycleÂ (3)Â Â (2 blocks missing 3/5)	tr|A0A291TWS4|A0A291TWS4_9GAMM	incomplete		0.13	-2.94342	NO_SP	FALSE	FALSE
155	222	A0A291TWH4|A0A291TWH4	11.21	44	16	16	0.761905	4.77969	772000000	59900000	517000000	48700000	50020	Argininosuccinate lyase OS=Aeromonas sp. CA23 OX=2033032 GN=argH PE=3 SV=1	K01755	M00029Â Urea cycleÂ (3)Â Â (2 blocks missing 3/5)	tr|A0A291TWH4|A0A291TWH4_9GAMM	incomplete		0.09	-3.47393	NO_SP	FALSE	FALSE
167	259	A0A291TWB0|A0A291TWB0	8.29	72	19	19	1.72727	52.367	1700000000	193000000	1080000000	122000000	33250	Ornithine carbamoyltransferase OS=Aeromonas sp. CA23 OX=2033032 GN=CK910_02045 PE=3 SV=1	K00611	M00029Â Urea cycleÂ (3)Â Â (2 blocks missing 3/5)	tr|A0A291TY23|A0A291TY23_9GAMM, tr|A0A291TWB0|A0A291TWB0_9GAMM	incomplete		0.11	-3.18442	NO_SP	FALSE	FALSE
537	299	A0A291TY23|A0A291TY23	12.65	37	13	12	0.866667	6.35642	78600000	36900000	30100000	17100000	37596	Ornithine carbamoyltransferase OS=Aeromonas sp. CA23 OX=2033032 GN=argF PE=3 SV=1	K00611	M00029Â Urea cycleÂ (3)Â Â (2 blocks missing 3/5)	tr|A0A291TY23|A0A291TY23_9GAMM, tr|A0A291TWB0|A0A291TWB0_9GAMM	incomplete		0.57	-0.810966	NO_SP	FALSE	FALSE
101	30	A0A291U0J1|A0A291U0J1	0.45	78	31	31	1.9375	85.5964	529000000	305000000	241000000	127000000	43338	Acetylornithine aminotransferase OS=Aeromonas sp. CA23 OX=2033032 GN=argD PE=3 SV=1	K00821	M00028Â Ornithine biosynthesis, glutamate => ornithineÂ (5)Â Â (complete 4/4)	tr|A0A291U0J1|A0A291U0J1_9GAMM	complete		0.53	-0.915936	NO_SP	FALSE	FALSE
249	184	A0A291TW35|A0A291TW35	14.35	59	14	14	1.75	55.2341	931000000	219000000	481000000	110000000	26426	Acetylglutamate kinase OS=Aeromonas sp. CA23 OX=2033032 GN=argB PE=3 SV=1	K00930	M00028Â Ornithine biosynthesis, glutamate => ornithineÂ (5)Â Â (complete 4/4)	tr|A0A291TW35|A0A291TW35_9GAMM	complete		0.23	-2.12029	NO_SP	FALSE	FALSE
479	393	A0A291TW07|A0A291TW07	10.89	53	12	12	0.923077	7.37678	199000000	39000000	96400000	32500000	35973	N-acetyl-gamma-glutamyl-phosphate reductase OS=Aeromonas sp. CA23 OX=2033032 GN=argC PE=3 SV=1	K00145	M00028Â Ornithine biosynthesis, glutamate => ornithineÂ (5)Â Â (complete 4/4)	tr|A0A291TW07|A0A291TW07_9GAMM	complete		0.34	-1.55639	NO_SP	FALSE	FALSE
1086	1133	A0A291TWH1|A0A291TWH1	2.33	10	3	3	0.25	0.778279	6290000	7570000	6290000	7570000	41473	Acetylornithine deacetylase OS=Aeromonas sp. CA23 OX=2033032 GN=CK910_02060 PE=3 SV=1	K01438	M00028Â Ornithine biosynthesis, glutamate => ornithineÂ (5)Â Â (complete 4/4)	tr|A0A291TWH1|A0A291TWH1_9GAMM	complete		1.2	0.263034	NO_SP	FALSE	FALSE
113	231	A0A291U1D1|A0A291U1D1	3.21	52	25	25	1.25	16.7828	645000000	380000000	500000000	310000000	45588	4-aminobutyrate--2-oxoglutarate transaminase OS=Aeromonas sp. CA23 OX=2033032 GN=gabT PE=3 SV=1	K07250	M00027Â GABA (gamma-Aminobutyrate) shuntÂ (3)Â Â (complete 3/3)	tr|A0A291U1D1|A0A291U1D1_9GAMM	complete		0.62	-0.68966	NO_SP	FALSE	FALSE
126	288	A0A291U0R4|A0A291U0R4	12.24	42	18	18	0.857143	6.19686	120000000	333000000	85200000	220000000	51626	Succinate-semialdehyde dehydrogenase (NADP(+)) OS=Aeromonas sp. CA23 OX=2033032 GN=gabD PE=3 SV=1	K00135	M00027Â GABA (gamma-Aminobutyrate) shuntÂ (3)Â Â (complete 3/3)	tr|A0A291U0R4|A0A291U0R4_9GAMM	complete		2.58	1.36737	NO_SP	FALSE	FALSE
1576	1276	A0A291TZY0|A0A291TZY0	0.59	5	2	2	0.0740741	0.185971	13700000	10600000	13700000	10600000	55326	Decarboxylase OS=Aeromonas sp. CA23 OX=2033032 GN=CK910_09565 PE=3 SV=1	K01580	M00027Â GABA (gamma-Aminobutyrate) shuntÂ (3)Â Â (complete 3/3)	tr|A0A291TZY0|A0A291TZY0_9GAMM	complete		0.77	-0.37707	NO_SP	FALSE	FALSE
295	142	A0A291U3U8|A0A291U3U8	0.85	57	17	17	1.21429	15.3789	298000000	116000000	152000000	72100000	32595	ATP phosphoribosyltransferase OS=Aeromonas sp. CA23 OX=2033032 GN=hisG PE=3 SV=1	K00765	M00026Â Histidine biosynthesis, PRPP => histidineÂ (8)Â Â (complete 6/6)	tr|A0A291U3U8|A0A291U3U8_9GAMM	complete		0.47	-1.08927	NO_SP	FALSE	FALSE
875	688	A0A291U3F4|A0A291U3F4	5.72	16	5	5	0.3125	1.05353	18200000	9180000	17400000	7310000	39557	Histidinol-phosphate aminotransferase OS=Aeromonas sp. CA23 OX=2033032 GN=hisC PE=3 SV=1	K00817	M00026Â Histidine biosynthesis, PRPP => histidineÂ (8)Â Â (complete 6/6)	tr|A0A291U3F4|A0A291U3F4_9GAMM	complete		0.42	-1.25154	NO_SP	FALSE	FALSE
1109	617	A0A291U3S9|A0A291U3S9	5.99	17	5	5	0.357143	1.27585	6280000	1940000	5530000	1880000	46132	Histidinol dehydrogenase OS=Aeromonas sp. CA23 OX=2033032 GN=hisD PE=3 SV=1	K00013	M00026Â Histidine biosynthesis, PRPP => histidineÂ (8)Â Â (complete 6/6)	tr|A0A291U3S9|A0A291U3S9_9GAMM	complete		0.34	-1.55639	NO_SP	FALSE	FALSE
1258	1185	A0A291U3Z5|A0A291U3Z5	9.36	11	2	2	0.142857	0.389495	4670000	1750000	4670000	1750000	40900	Histidine biosynthesis bifunctional protein HisB OS=Aeromonas sp. CA23 OX=2033032 GN=hisB PE=3 SV=1	K01089	M00026Â Histidine biosynthesis, PRPP => histidineÂ (8)Â Â (complete 6/6)	tr|A0A291U3Z5|A0A291U3Z5_9GAMM	complete		0.37	-1.4344	NO_SP	FALSE	FALSE
1435	1283	A0A291U3F5|A0A291U3F5	5.34	7	2	2	0.166667	0.467799	1610000	355000	1610000	355000	28276	Imidazole glycerol phosphate synthase subunit HisF OS=Aeromonas sp. CA23 OX=2033032 GN=hisF PE=3 SV=1	K02500	M00026Â Histidine biosynthesis, PRPP => histidineÂ (8)Â Â (complete 6/6)	tr|A0A291U3F5|A0A291U3F5_9GAMM	complete		0.22	-2.18442	NO_SP	FALSE	FALSE
1594	1362	A0A291U350|A0A291U350	0	16	2	2	0.25	0.778279	3470000	342000	3470000	342000	22350	Imidazole glycerol phosphate synthase subunit HisH OS=Aeromonas sp. CA23 OX=2033032 GN=hisH PE=3 SV=1	K02501	M00026Â Histidine biosynthesis, PRPP => histidineÂ (8)Â Â (complete 6/6)	tr|A0A291U350|A0A291U350_9GAMM	complete		0.1	-3.32193	NO_SP	FALSE	FALSE
1073	900	A0A291TWN5|A0A291TWN5	0.07	15	4	4	0.2	0.584893	11400000	10800000	11000000	9150000	43614	Aromatic amino acid aminotransferase OS=Aeromonas sp. CA23 OX=2033032 GN=CK910_01885 PE=3 SV=1	K00832	M00025Â Tyrosine biosynthesis, chorismate => HPP => tyrosineÂ (3)Â Â (complete 2/2)	tr|A0A291TWN5|A0A291TWN5_9GAMM	complete		0.83	-0.268817	NO_SP	FALSE	FALSE
1073	900	A0A291TWN5|A0A291TWN5	0.07	15	4	4	0.2	0.584893	11400000	10800000	11000000	9150000	43614	Aromatic amino acid aminotransferase OS=Aeromonas sp. CA23 OX=2033032 GN=CK910_01885 PE=3 SV=1	K00832	M00024Â Phenylalanine biosynthesis, chorismate => phenylpyruvate => phenylalanineÂ (3)Â Â (complete 2/2)	tr|A0A291TWN5|A0A291TWN5_9GAMM	complete		0.83	-0.268817	NO_SP	FALSE	FALSE
432	720	A0A291U1L1|A0A291U1L1	4.87	41	10	10	0.666667	3.64159	63100000	108000000	48000000	83500000	42887	Tryptophan synthase beta chain OS=Aeromonas sp. CA23 OX=2033032 GN=trpB PE=3 SV=1	K01696	M00023Â Tryptophan biosynthesis, chorismate => tryptophanÂ (6)Â Â (complete 3/3)	tr|A0A291U1L1|A0A291U1L1_9GAMM	complete		1.74	0.799087	NO_SP	FALSE	FALSE
471	414	A0A291U1K7|A0A291U1K7	4.97	22	10	10	0.434783	1.72134	20100000	32500000	14200000	24300000	60012	Anthranilate synthase component 1 OS=Aeromonas sp. CA23 OX=2033032 GN=CK910_12420 PE=3 SV=1	K01657	M00023Â Tryptophan biosynthesis, chorismate => tryptophanÂ (6)Â Â (complete 3/3)	tr|A0A291U1K7|A0A291U1K7_9GAMM	complete		1.72	0.782409	NO_SP	FALSE	FALSE
478	275	A0A291U1K2|A0A291U1K2	9.12	50	10	10	0.714286	4.17947	203000000	132000000	138000000	96700000	28389	Tryptophan synthase alpha chain OS=Aeromonas sp. CA23 OX=2033032 GN=trpA PE=3 SV=1	K01695	M00023Â Tryptophan biosynthesis, chorismate => tryptophanÂ (6)Â Â (complete 3/3)	tr|A0A291U1K2|A0A291U1K2_9GAMM	complete	GT21.hmm	0.7	-0.514573	NO_SP	FALSE	FALSE
528	327	A0A291U1K3|A0A291U1K3	20	39	8	8	0.666667	3.64159	159000000	69900000	105000000	45700000	35399	Anthranilate phosphoribosyltransferase OS=Aeromonas sp. CA23 OX=2033032 GN=trpD PE=3 SV=1	K00766	M00023Â Tryptophan biosynthesis, chorismate => tryptophanÂ (6)Â Â (complete 3/3)	tr|A0A291U1K3|A0A291U1K3_9GAMM	complete		0.44	-1.18442	NO_SP	FALSE	FALSE
1205	685	A0A291U0Y4|A0A291U0Y4	0.09	51	5	5	1.25	16.7828	246000000	224000000	245000000	224000000	21460	Type 1 glutamine amidotransferase OS=Aeromonas sp. CA23 OX=2033032 GN=CK910_12415 PE=4 SV=1	K01658	M00023Â Tryptophan biosynthesis, chorismate => tryptophanÂ (6)Â Â (complete 3/3)	tr|A0A291U0Y4|A0A291U0Y4_9GAMM	complete		0.91	-0.136062	NO_SP	FALSE	FALSE
251	179	A0A291U4E5|A0A291U4E5	4.13	48	15	14	1.07143	10.7877	305000000	62100000	151000000	30400000	39351	Phospho-2-dehydro-3-deoxyheptonate aldolase OS=Aeromonas sp. CA23 OX=2033032 GN=CK910_19665 PE=3 SV=1	K01626	M00022Â Shikimate pathway, phosphoenolpyruvate + erythrose-4P => chorismateÂ (7)Â Â (complete 4/4)	tr|A0A291U1I1|A0A291U1I1_9GAMM, tr|A0A291U4E5|A0A291U4E5_9GAMM, tr|A0A291U433|A0A291U433_9GAMM, tr|A0A291U7L8|A0A291U7L8_9GAMM	complete		0.2	-2.32193	NO_SP	FALSE	FALSE
392	102	A0A291U433|A0A291U433	7.75	46	14	13	0.777778	4.99484	474000000	50900000	354000000	38500000	38088	Phospho-2-dehydro-3-deoxyheptonate aldolase OS=Aeromonas sp. CA23 OX=2033032 GN=CK910_18075 PE=3 SV=1	K01626	M00022Â Shikimate pathway, phosphoenolpyruvate + erythrose-4P => chorismateÂ (7)Â Â (complete 4/4)	tr|A0A291U1I1|A0A291U1I1_9GAMM, tr|A0A291U4E5|A0A291U4E5_9GAMM, tr|A0A291U433|A0A291U433_9GAMM, tr|A0A291U7L8|A0A291U7L8_9GAMM	complete		0.11	-3.18442	NO_SP	FALSE	FALSE
413	163	A0A291U3X6|A0A291U3X6	7.68	46	13	13	0.684211	3.83293	156000000	29900000	131000000	28600000	49598	3-phosphoshikimate 1-carboxyvinyltransferase OS=Aeromonas sp. CA23 OX=2033032 GN=aroA PE=3 SV=1	K00800	M00022Â Shikimate pathway, phosphoenolpyruvate + erythrose-4P => chorismateÂ (7)Â Â (complete 4/4)	tr|A0A291U3X6|A0A291U3X6_9GAMM	complete		0.22	-2.18442	NO_SP	FALSE	FALSE
423	253	A0A291U2S0|A0A291U2S0	15.31	58	13	13	0.8125	5.49382	178000000	60700000	94900000	40700000	38897	Chorismate synthase OS=Aeromonas sp. CA23 OX=2033032 GN=aroC PE=3 SV=1	K01736	M00022Â Shikimate pathway, phosphoenolpyruvate + erythrose-4P => chorismateÂ (7)Â Â (complete 4/4)	tr|A0A291U2S0|A0A291U2S0_9GAMM	complete		0.43	-1.21759	NO_SP	FALSE	FALSE
464	535	A0A291TZV7|A0A291TZV7	8.71	72	8	8	1.33333	20.5443	140000000	217000000	74900000	137000000	16251	3-dehydroquinate dehydratase OS=Aeromonas sp. CA23 OX=2033032 GN=aroQ PE=3 SV=1	K03786	M00022Â Shikimate pathway, phosphoenolpyruvate + erythrose-4P => chorismateÂ (7)Â Â (complete 4/4)	tr|A0A291TZV7|A0A291TZV7_9GAMM	complete		1.82	0.863938	NO_SP	FALSE	FALSE
747	321	A0A291U1I1|A0A291U1I1	1.55	29	8	7	0.533333	2.41455	31500000	23300000	28200000	21600000	39100	Phospho-2-dehydro-3-deoxyheptonate aldolase OS=Aeromonas sp. CA23 OX=2033032 GN=CK910_13555 PE=3 SV=1	K01626	M00022Â Shikimate pathway, phosphoenolpyruvate + erythrose-4P => chorismateÂ (7)Â Â (complete 4/4)	tr|A0A291U1I1|A0A291U1I1_9GAMM, tr|A0A291U4E5|A0A291U4E5_9GAMM, tr|A0A291U433|A0A291U433_9GAMM, tr|A0A291U7L8|A0A291U7L8_9GAMM	complete		0.77	-0.37707	NO_SP	FALSE	FALSE
764	956	A0A291U0Y1|A0A291U0Y1	17.5	29	6	6	0.315789	1.06914	14800000	1450000	12100000	1360000	39198	3-dehydroquinate synthase OS=Aeromonas sp. CA23 OX=2033032 GN=aroB PE=3 SV=1	K01735	M00022Â Shikimate pathway, phosphoenolpyruvate + erythrose-4P => chorismateÂ (7)Â Â (complete 4/4)	tr|A0A291U0Y1|A0A291U0Y1_9GAMM	complete		0.11	-3.18442	NO_SP	FALSE	FALSE
1017	1397	A0A291U0G3|A0A291U0G3	8.91	12	2	2	0.25	0.778279	39100000	15400000	28200000	13300000	19432	Shikimate kinase OS=Aeromonas sp. CA23 OX=2033032 GN=aroK PE=3 SV=1	K00891	M00022Â Shikimate pathway, phosphoenolpyruvate + erythrose-4P => chorismateÂ (7)Â Â (complete 4/4)	tr|A0A291U0G3|A0A291U0G3_9GAMM	complete		0.47	-1.08927	NO_SP	FALSE	FALSE
1496	1102	A0A291TWS0|A0A291TWS0	3.89	7	2	2	0.153846	0.425103	615000	544000	615000	544000	29363	Shikimate dehydrogenase (NADP(+)) OS=Aeromonas sp. CA23 OX=2033032 GN=aroE PE=3 SV=1	K00014	M00022Â Shikimate pathway, phosphoenolpyruvate + erythrose-4P => chorismateÂ (7)Â Â (complete 4/4)	tr|A0A291TWS0|A0A291TWS0_9GAMM	complete		0.89	-0.168123	NO_SP	FALSE	FALSE
81	75	A0A291U1A7|A0A291U1A7	9.96	82	29	29	1.93333	84.7696	1840000000	330000000	661000000	138000000	34263	Cysteine synthase OS=Aeromonas sp. CA23 OX=2033032 GN=cysK PE=3 SV=1	K01738	M00021Â Cysteine biosynthesis, serine => cysteineÂ (2)Â Â (complete 2/2)	tr|A0A291U1A7|A0A291U1A7_9GAMM	complete		0.21	-2.25154	NO_SP	FALSE	FALSE
719	448	A0A291TX81|A0A291TX81	2.37	32	7	7	0.538462	2.45511	35800000	20600000	31200000	19700000	27841	Serine acetyltransferase OS=Aeromonas sp. CA23 OX=2033032 GN=CK910_04075 PE=3 SV=1	K00640	M00021Â Cysteine biosynthesis, serine => cysteineÂ (2)Â Â (complete 2/2)	tr|A0A291TX81|A0A291TX81_9GAMM	complete		0.63	-0.666576	NO_SP	FALSE	FALSE
50	62	A0A291U3V4|A0A291U3V4	10.66	70	30	30	1.5	30.6228	1610000000	612000000	608000000	247000000	39379	Phosphoserine aminotransferase OS=Aeromonas sp. CA23 OX=2033032 GN=serC PE=3 SV=1	K00831	M00020Â Serine biosynthesis, glycerate-3P => serineÂ (3)Â Â (complete 3/3)	tr|A0A291U3V4|A0A291U3V4_9GAMM	complete		0.41	-1.2863	NO_SP	FALSE	FALSE
91	78	A0A291U2L1|A0A291U2L1	12.18	70	24	24	1.5	30.6228	2350000000	88200000	1420000000	52300000	44647	2-oxoglutarate reductase OS=Aeromonas sp. CA23 OX=2033032 GN=CK910_13565 PE=3 SV=1	K00058	M00020Â Serine biosynthesis, glycerate-3P => serineÂ (3)Â Â (complete 3/3)	tr|A0A291U2L1|A0A291U2L1_9GAMM, tr|A0A291U0A1|A0A291U0A1_9GAMM	complete		0.04	-4.64386	NO_SP	FALSE	FALSE
12	51	A0A291TXL9|A0A291TXL9	11.68	77	44	44	1.76	56.544	3940000000	107000000	1580000000	44100000	53727	Ketol-acid reductoisomerase (NADP(+)) OS=Aeromonas sp. CA23 OX=2033032 GN=ilvC PE=3 SV=1	K00053	M00019Â Valine/isoleucine biosynthesis, pyruvate => valine / 2-oxobutanoate => isoleucineÂ (6)Â Â (complete 4/4)	tr|A0A291TXL9|A0A291TXL9_9GAMM	complete		0.03	-5.05889	NO_SP	FALSE	FALSE
56	11	A0A291U754|A0A291U754	17.5	74	31	31	1.47619	28.9358	3550000000	4690000	2470000000	2310000	59401	Acetolactate synthase AlsS OS=Aeromonas sp. CA23 OX=2033032 GN=CK910_22695 PE=3 SV=1	K01652	M00019Â Valine/isoleucine biosynthesis, pyruvate => valine / 2-oxobutanoate => isoleucineÂ (6)Â Â (complete 4/4)	tr|A0A291TVF0|A0A291TVF0_9GAMM, tr|A0A291TYG5|A0A291TYG5_9GAMM, tr|A0A291U754|A0A291U754_9GAMM	complete		0.02	-5.64386	NO_SP	FALSE	FALSE
66	79	A0A291TXS2|A0A291TXS2	10.42	54	31	31	1.14815	13.0653	510000000	98100000	186000000	53300000	65080	Dihydroxy-acid dehydratase OS=Aeromonas sp. CA23 OX=2033032 GN=ilvD PE=3 SV=1	K01687	M00019Â Valine/isoleucine biosynthesis, pyruvate => valine / 2-oxobutanoate => isoleucineÂ (6)Â Â (complete 4/4)	tr|A0A291TXS2|A0A291TXS2_9GAMM	complete		0.29	-1.78588	NO_SP	FALSE	FALSE
104	105	A0A291TXS3|A0A291TXS3	7.51	61	18	18	1.2	14.8489	4730000000	1840000000	4220000000	1670000000	34350	Branched-chain-amino-acid aminotransferase OS=Aeromonas sp. CA23 OX=2033032 GN=ilvE PE=3 SV=1	K00826	M00019Â Valine/isoleucine biosynthesis, pyruvate => valine / 2-oxobutanoate => isoleucineÂ (6)Â Â (complete 4/4)	tr|A0A291TXS3|A0A291TXS3_9GAMM	complete		0.39	-1.35845	NO_SP	FALSE	FALSE
452	227	A0A291TVM4|A0A291TVM4	21.23	81	11	11	1.1	11.5893	786000000	209000000	591000000	153000000	18123	Acetolactate synthase OS=Aeromonas sp. CA23 OX=2033032 GN=CK910_00530 PE=3 SV=1	K01653	M00019Â Valine/isoleucine biosynthesis, pyruvate => valine / 2-oxobutanoate => isoleucineÂ (6)Â Â (complete 4/4)	tr|A0A291TVM4|A0A291TVM4_9GAMM	complete		0.26	-1.94342	NO_SP	FALSE	FALSE
976	708	A0A291TVF0|A0A291TVF0	4.44	17	4	4	0.210526	0.623777	17100000	8270000	17000000	7710000	62543	Acetolactate synthase OS=Aeromonas sp. CA23 OX=2033032 GN=CK910_00540 PE=3 SV=1	K01652	M00019Â Valine/isoleucine biosynthesis, pyruvate => valine / 2-oxobutanoate => isoleucineÂ (6)Â Â (complete 4/4)	tr|A0A291TVF0|A0A291TVF0_9GAMM, tr|A0A291TYG5|A0A291TYG5_9GAMM, tr|A0A291U754|A0A291U754_9GAMM	complete		0.45	-1.152	NO_SP	FALSE	FALSE
73	88	A0A291U337|A0A291U337	5.33	71	24	24	1.71429	50.7947	824000000	366000000	405000000	204000000	40044	Aspartate-semialdehyde dehydrogenase OS=Aeromonas sp. CA23 OX=2033032 GN=asd PE=3 SV=1	K00133	M00018Â Threonine biosynthesis, aspartate => homoserine => threonineÂ (6)Â Â (complete 5/5)	tr|A0A291U337|A0A291U337_9GAMM, tr|A0A291U2B2|A0A291U2B2_9GAMM	complete		0.5	-1	NO_SP	FALSE	FALSE
343	106	A0A291U2R2|A0A291U2R2	4.5	50	16	16	0.941176	7.73326	298000000	46700000	159000000	30500000	47986	Aspartokinase OS=Aeromonas sp. CA23 OX=2033032 GN=CK910_14850 PE=3 SV=1	K00928	M00018Â Threonine biosynthesis, aspartate => homoserine => threonineÂ (6)Â Â (complete 5/5)	tr|A0A291TZ83|A0A291TZ83_9GAMM, tr|A0A291U2R2|A0A291U2R2_9GAMM	complete		0.19	-2.39593	NO_SP	FALSE	FALSE
363	204	A0A291TZ83|A0A291TZ83	2.08	44	13	13	0.619048	3.15956	171000000	119000000	146000000	105000000	44462	Aspartokinase OS=Aeromonas sp. CA23 OX=2033032 GN=CK910_08195 PE=3 SV=1	K00928	M00018Â Threonine biosynthesis, aspartate => homoserine => threonineÂ (6)Â Â (complete 5/5)	tr|A0A291TZ83|A0A291TZ83_9GAMM, tr|A0A291U2R2|A0A291U2R2_9GAMM	complete		0.72	-0.473931	NO_SP	FALSE	FALSE
397	278	A0A291U0X9|A0A291U0X9	9.63	30	11	11	0.647059	3.43669	118000000	25000000	75600000	14300000	46438	Threonine synthase OS=Aeromonas sp. CA23 OX=2033032 GN=CK910_11945 PE=3 SV=1	K01733	M00018Â Threonine biosynthesis, aspartate => homoserine => threonineÂ (6)Â Â (complete 5/5)	tr|A0A291TW04|A0A291TW04_9GAMM, tr|A0A291U0X9|A0A291U0X9_9GAMM	complete		0.19	-2.39593	NO_SP	FALSE	FALSE
623	504	A0A291U0Z6|A0A291U0Z6	7.4	26	9	9	0.9	6.94328	107000000	56700000	76600000	41700000	34744	Homoserine kinase OS=Aeromonas sp. CA23 OX=2033032 GN=thrB PE=3 SV=1	K00872	M00018Â Threonine biosynthesis, aspartate => homoserine => threonineÂ (6)Â Â (complete 5/5)	tr|A0A291U0Z6|A0A291U0Z6_9GAMM	complete		0.54	-0.888969	NO_SP	FALSE	FALSE
635	400	A0A291U2B2|A0A291U2B2	0.71	38	7	7	0.583333	2.83119	30800000	25900000	18600000	19100000	36784	Aspartate-semialdehyde dehydrogenase OS=Aeromonas sp. CA23 OX=2033032 GN=asd PE=3 SV=1	K00133	M00018Â Threonine biosynthesis, aspartate => homoserine => threonineÂ (6)Â Â (complete 5/5)	tr|A0A291U337|A0A291U337_9GAMM, tr|A0A291U2B2|A0A291U2B2_9GAMM	complete		1.02	0.0285692	NO_SP	FALSE	FALSE
73	88	A0A291U337|A0A291U337	5.33	71	24	24	1.71429	50.7947	824000000	366000000	405000000	204000000	40044	Aspartate-semialdehyde dehydrogenase OS=Aeromonas sp. CA23 OX=2033032 GN=asd PE=3 SV=1	K00133	M00017Â Methionine biosynthesis, aspartate => homoserine => methionineÂ (9)Â Â (complete 7/7)	tr|A0A291U337|A0A291U337_9GAMM, tr|A0A291U2B2|A0A291U2B2_9GAMM	complete		0.5	-1	NO_SP	FALSE	FALSE
343	106	A0A291U2R2|A0A291U2R2	4.5	50	16	16	0.941176	7.73326	298000000	46700000	159000000	30500000	47986	Aspartokinase OS=Aeromonas sp. CA23 OX=2033032 GN=CK910_14850 PE=3 SV=1	K00928	M00017Â Methionine biosynthesis, aspartate => homoserine => methionineÂ (9)Â Â (complete 7/7)	tr|A0A291TZ83|A0A291TZ83_9GAMM, tr|A0A291U2R2|A0A291U2R2_9GAMM	complete		0.19	-2.39593	NO_SP	FALSE	FALSE
363	204	A0A291TZ83|A0A291TZ83	2.08	44	13	13	0.619048	3.15956	171000000	119000000	146000000	105000000	44462	Aspartokinase OS=Aeromonas sp. CA23 OX=2033032 GN=CK910_08195 PE=3 SV=1	K00928	M00017Â Methionine biosynthesis, aspartate => homoserine => methionineÂ (9)Â Â (complete 7/7)	tr|A0A291TZ83|A0A291TZ83_9GAMM, tr|A0A291U2R2|A0A291U2R2_9GAMM	complete		0.72	-0.473931	NO_SP	FALSE	FALSE
398	561	A0A291TWF7|A0A291TWF7	5.62	64	12	12	1.5	30.6228	365000000	78200000	210000000	49900000	41507	O-succinylhomoserine (Thiol)-lyase OS=Aeromonas sp. CA23 OX=2033032 GN=metB PE=3 SV=1	K01739	M00017Â Methionine biosynthesis, aspartate => homoserine => methionineÂ (9)Â Â (complete 7/7)	tr|A0A291TWF7|A0A291TWF7_9GAMM	complete		0.24	-2.05889	NO_SP	FALSE	FALSE
417	128	A0A291U347|A0A291U347	11.04	21	14	14	0.4	1.51189	86700000	2440000	64300000	1990000	84993	5-methyltetrahydropteroyltriglutamate--homocysteine methyltransferase OS=Aeromonas sp. CA23 OX=2033032 GN=metE PE=3 SV=1	K00549	M00017Â Methionine biosynthesis, aspartate => homoserine => methionineÂ (9)Â Â (complete 7/7)	tr|A0A291U347|A0A291U347_9GAMM	complete		0.03	-5.05889	NO_SP	FALSE	FALSE
635	400	A0A291U2B2|A0A291U2B2	0.71	38	7	7	0.583333	2.83119	30800000	25900000	18600000	19100000	36784	Aspartate-semialdehyde dehydrogenase OS=Aeromonas sp. CA23 OX=2033032 GN=asd PE=3 SV=1	K00133	M00017Â Methionine biosynthesis, aspartate => homoserine => methionineÂ (9)Â Â (complete 7/7)	tr|A0A291U337|A0A291U337_9GAMM, tr|A0A291U2B2|A0A291U2B2_9GAMM	complete		1.02	0.0285692	NO_SP	FALSE	FALSE
1005	498	A0A291TX18|A0A291TX18	6.02	14	5	5	0.357143	1.27585	39200000	7900000	37200000	7770000	36284	Homoserine O-succinyltransferase OS=Aeromonas sp. CA23 OX=2033032 GN=metAS PE=3 SV=1	K00651	M00017Â Methionine biosynthesis, aspartate => homoserine => methionineÂ (9)Â Â (complete 7/7)	tr|A0A291TX18|A0A291TX18_9GAMM	complete		0.21	-2.25154	NO_SP	FALSE	FALSE
73	88	A0A291U337|A0A291U337	5.33	71	24	24	1.71429	50.7947	824000000	366000000	405000000	204000000	40044	Aspartate-semialdehyde dehydrogenase OS=Aeromonas sp. CA23 OX=2033032 GN=asd PE=3 SV=1	K00133	M00016Â Lysine biosynthesis, succinyl-DAP pathway, aspartate => lysineÂ (11)Â Â (complete 9/9)	tr|A0A291U337|A0A291U337_9GAMM, tr|A0A291U2B2|A0A291U2B2_9GAMM	complete		0.5	-1	NO_SP	FALSE	FALSE
101	30	A0A291U0J1|A0A291U0J1	0.45	78	31	31	1.9375	85.5964	529000000	305000000	241000000	127000000	43338	Acetylornithine aminotransferase OS=Aeromonas sp. CA23 OX=2033032 GN=argD PE=3 SV=1	K00821	M00016Â Lysine biosynthesis, succinyl-DAP pathway, aspartate => lysineÂ (11)Â Â (complete 9/9)	tr|A0A291U0J1|A0A291U0J1_9GAMM	complete		0.53	-0.915936	NO_SP	FALSE	FALSE
124	99	A0A291TYQ1|A0A291TYQ1	10.23	97	19	19	1.72727	52.367	1800000000	495000000	1140000000	344000000	31252	4-hydroxy-tetrahydrodipicolinate synthase OS=Aeromonas sp. CA23 OX=2033032 GN=dapA PE=3 SV=1	K01714	M00016Â Lysine biosynthesis, succinyl-DAP pathway, aspartate => lysineÂ (11)Â Â (complete 9/9)	tr|A0A291TVM1|A0A291TVM1_9GAMM, tr|A0A291TYQ1|A0A291TYQ1_9GAMM	complete		0.3	-1.73697	NO_SP	FALSE	FALSE
170	108	A0A291U628|A0A291U628	0.62	79	23	23	1.76923	57.7802	858000000	734000000	484000000	384000000	29492	2 3 4 5-tetrahydropyridine-2 6-dicarboxylate N-succinyltransferase OS=Aeromonas sp. CA23 OX=2033032 GN=dapD PE=3 SV=1	K00674	M00016Â Lysine biosynthesis, succinyl-DAP pathway, aspartate => lysineÂ (11)Â Â (complete 9/9)	tr|A0A291U628|A0A291U628_9GAMM	complete		0.79	-0.340075	NO_SP	FALSE	FALSE
227	113	A0A291TWS7|A0A291TWS7	1.12	54	18	18	1.05882	10.4505	210000000	136000000	107000000	82100000	45318	Diaminopimelate decarboxylase OS=Aeromonas sp. CA23 OX=2033032 GN=lysA PE=3 SV=1	K01586	M00016Â Lysine biosynthesis, succinyl-DAP pathway, aspartate => lysineÂ (11)Â Â (complete 9/9)	tr|A0A291TWS7|A0A291TWS7_9GAMM	complete		0.77	-0.37707	NO_SP	FALSE	FALSE
343	106	A0A291U2R2|A0A291U2R2	4.5	50	16	16	0.941176	7.73326	298000000	46700000	159000000	30500000	47986	Aspartokinase OS=Aeromonas sp. CA23 OX=2033032 GN=CK910_14850 PE=3 SV=1	K00928	M00016Â Lysine biosynthesis, succinyl-DAP pathway, aspartate => lysineÂ (11)Â Â (complete 9/9)	tr|A0A291TZ83|A0A291TZ83_9GAMM, tr|A0A291U2R2|A0A291U2R2_9GAMM	complete		0.19	-2.39593	NO_SP	FALSE	FALSE
363	204	A0A291TZ83|A0A291TZ83	2.08	44	13	13	0.619048	3.15956	171000000	119000000	146000000	105000000	44462	Aspartokinase OS=Aeromonas sp. CA23 OX=2033032 GN=CK910_08195 PE=3 SV=1	K00928	M00016Â Lysine biosynthesis, succinyl-DAP pathway, aspartate => lysineÂ (11)Â Â (complete 9/9)	tr|A0A291TZ83|A0A291TZ83_9GAMM, tr|A0A291U2R2|A0A291U2R2_9GAMM	complete		0.72	-0.473931	NO_SP	FALSE	FALSE
594	262	A0A291TVM1|A0A291TVM1	0.92	41	8	8	0.8	5.30957	34300000	20200000	17600000	9670000	30825	4-hydroxy-tetrahydrodipicolinate synthase OS=Aeromonas sp. CA23 OX=2033032 GN=dapA PE=3 SV=1	K01714	M00016Â Lysine biosynthesis, succinyl-DAP pathway, aspartate => lysineÂ (11)Â Â (complete 9/9)	tr|A0A291TVM1|A0A291TVM1_9GAMM, tr|A0A291TYQ1|A0A291TYQ1_9GAMM	complete		0.55	-0.862496	NO_SP	FALSE	FALSE
635	400	A0A291U2B2|A0A291U2B2	0.71	38	7	7	0.583333	2.83119	30800000	25900000	18600000	19100000	36784	Aspartate-semialdehyde dehydrogenase OS=Aeromonas sp. CA23 OX=2033032 GN=asd PE=3 SV=1	K00133	M00016Â Lysine biosynthesis, succinyl-DAP pathway, aspartate => lysineÂ (11)Â Â (complete 9/9)	tr|A0A291U337|A0A291U337_9GAMM, tr|A0A291U2B2|A0A291U2B2_9GAMM	complete		1.02	0.0285692	NO_SP	FALSE	FALSE
925	884	A0A291U262|A0A291U262	11.78	20	6	6	0.545455	2.51119	37600000	2270000	23100000	1190000	28655	4-hydroxy-tetrahydrodipicolinate reductase OS=Aeromonas sp. CA23 OX=2033032 GN=dapB PE=3 SV=1	K00215	M00016Â Lysine biosynthesis, succinyl-DAP pathway, aspartate => lysineÂ (11)Â Â (complete 9/9)	tr|A0A291U262|A0A291U262_9GAMM	complete		0.05	-4.32193	NO_SP	FALSE	FALSE
1045	1068	A0A291U548|A0A291U548	12.32	11	3	3	0.230769	0.701254	2500000	748000	2500000	748000	40466	Succinyl-diaminopimelate desuccinylase OS=Aeromonas sp. CA23 OX=2033032 GN=dapE PE=3 SV=1	K01439	M00016Â Lysine biosynthesis, succinyl-DAP pathway, aspartate => lysineÂ (11)Â Â (complete 9/9)	tr|A0A291U548|A0A291U548_9GAMM	complete		0.3	-1.73697	NO_SP	FALSE	FALSE
1598	1818	A0A291TWB1|A0A291TWB1	1.78	6	2	2	0.2	0.584893	1080000	917000	1080000	917000	30375	Diaminopimelate epimerase OS=Aeromonas sp. CA23 OX=2033032 GN=dapF PE=3 SV=1	K01778	M00016Â Lysine biosynthesis, succinyl-DAP pathway, aspartate => lysineÂ (11)Â Â (complete 9/9)	tr|A0A291TWB1|A0A291TWB1_9GAMM	complete		0.85	-0.234465	NO_SP	FALSE	FALSE
96	31	A0A291U0C1|A0A291U0C1	10.49	69	32	32	1.33333	20.5443	366000000	252000000	144000000	96100000	44421	Gamma-glutamyl phosphate reductase OS=Aeromonas sp. CA23 OX=2033032 GN=proA PE=3 SV=1	K00147	M00015Â Proline biosynthesis, glutamate => prolineÂ (3)Â Â (complete 2/2)	tr|A0A291U0C1|A0A291U0C1_9GAMM	complete		0.67	-0.577767	NO_SP	FALSE	FALSE
620	566	A0A291TZS5|A0A291TZS5	15.81	29	6	6	0.461538	1.89427	174000000	83900000	138000000	55900000	28793	Pyrroline-5-carboxylate reductase OS=Aeromonas sp. CA23 OX=2033032 GN=proC PE=3 SV=1	K00286	M00015Â Proline biosynthesis, glutamate => prolineÂ (3)Â Â (complete 2/2)	tr|A0A291TZS5|A0A291TZS5_9GAMM	complete		0.41	-1.2863	NO_SP	FALSE	FALSE
1152	838	A0A291U002|A0A291U002	0.36	12	3	3	0.166667	0.467799	1680000	1250000	1680000	1250000	39457	Glutamate 5-kinase OS=Aeromonas sp. CA23 OX=2033032 GN=proB PE=3 SV=1	K00931	M00015Â Proline biosynthesis, glutamate => prolineÂ (3)Â Â (complete 2/2)	tr|A0A291U002|A0A291U002_9GAMM	complete		0.74	-0.434403	NO_SP	FALSE	FALSE
207	172	A0A291U7K0|A0A291U7K0	14.82	31	15	15	0.625	3.21697	313000000	75300000	189000000	43300000	49402	UDP-glucose 6-dehydrogenase OS=Aeromonas sp. CA23 OX=2033032 GN=CK910_23565 PE=3 SV=1	K00012	M00014Â Glucuronate pathway (uronate pathway)Â (1)Â Â (incomplete 1/7)	tr|A0A291U7K0|A0A291U7K0_9GAMM	complete		0.23	-2.12029	NO_SP	FALSE	FALSE
282	479	A0A291U470|A0A291U470	13.08	34	15	15	0.75	4.62341	79300000	199000000	59600000	136000000	54392	Methylmalonate-semialdehyde dehydrogenase (CoA acylating) OS=Aeromonas sp. CA23 OX=2033032 GN=mmsA PE=4 SV=1	K00140	M00013Â Malonate semialdehyde pathway, propanoyl-CoA => acetyl-CoAÂ (1)Â Â (incomplete 1/5)	tr|A0A291TXC1|A0A291TXC1_9GAMM, tr|A0A291U470|A0A291U470_9GAMM	complete		2.28	1.18903	NO_SP	FALSE	FALSE
607	748	A0A291TXC1|A0A291TXC1	6.47	26	8	8	0.363636	1.31013	5280000	12300000	3580000	9270000	53740	Methylmalonate-semialdehyde dehydrogenase (CoA acylating) OS=Aeromonas sp. CA23 OX=2033032 GN=mmsA PE=4 SV=1	K00140	M00013Â Malonate semialdehyde pathway, propanoyl-CoA => acetyl-CoAÂ (1)Â Â (incomplete 1/5)	tr|A0A291TXC1|A0A291TXC1_9GAMM, tr|A0A291U470|A0A291U470_9GAMM	complete		2.59	1.37295	NO_SP	FALSE	FALSE
15	12	A0A291TYV0|A0A291TYV0	2.92	68	55	55	1.375	22.7137	839000000	1160000000	373000000	503000000	93074	Aconitate hydratase B OS=Aeromonas sp. CA23 OX=2033032 GN=acnB PE=3 SV=1	K01682	M00012Â Glyoxylate cycleÂ (5)Â Â (complete 5/5)	tr|A0A291TYV0|A0A291TYV0_9GAMM	complete		1.35	0.432959	NO_SP	FALSE	FALSE
35	103	A0A291U1K1|A0A291U1K1	12.85	81	33	33	1.57143	36.2759	733000000	3000000000	375000000	1270000000	47826	Isocitrase OS=Aeromonas sp. CA23 OX=2033032 GN=CK910_12840 PE=4 SV=1	K01637	M00012Â Glyoxylate cycleÂ (5)Â Â (complete 5/5)	tr|A0A291U1K1|A0A291U1K1_9GAMM	complete		3.39	1.76129	NO_SP	FALSE	FALSE
54	38	A0A291U2T3|A0A291U2T3	2.34	81	28	27	1.33333	20.5443	649000000	748000000	255000000	279000000	48026	Citrate synthase OS=Aeromonas sp. CA23 OX=2033032 GN=gltA PE=3 SV=1	K01647	M00012Â Glyoxylate cycleÂ (5)Â Â (complete 5/5)	tr|A0A291U2T3|A0A291U2T3_9GAMM	complete		1.09	0.124328	NO_SP	FALSE	FALSE
55	54	A0A291TW78|A0A291TW78	3.29	85	26	26	2	99	4100000000	5180000000	2440000000	3090000000	32085	Malate dehydrogenase OS=Aeromonas sp. CA23 OX=2033032 GN=mdh PE=3 SV=1	K00024	M00012Â Glyoxylate cycleÂ (5)Â Â (complete 5/5)	tr|A0A291TW78|A0A291TW78_9GAMM	complete	GH4.hmm	1.27	0.344828	NO_SP	FALSE	FALSE
55	54	A0A291TW78|A0A291TW78	3.29	85	26	26	2	99	4100000000	5180000000	2440000000	3090000000	32085	Malate dehydrogenase OS=Aeromonas sp. CA23 OX=2033032 GN=mdh PE=3 SV=1	K00024	M00012Â Glyoxylate cycleÂ (5)Â Â (complete 5/5)	tr|A0A291TW78|A0A291TW78_9GAMM	complete	GH4.hmm	1.27	0.344828	NO_SP	FALSE	FALSE
55	54	A0A291TW78|A0A291TW78	3.29	85	26	26	2	99	4100000000	5180000000	2440000000	3090000000	32085	Malate dehydrogenase OS=Aeromonas sp. CA23 OX=2033032 GN=mdh PE=3 SV=1	K00024	M00012Â Glyoxylate cycleÂ (5)Â Â (complete 5/5)	tr|A0A291TW78|A0A291TW78_9GAMM	complete	GH4.hmm	1.27	0.344828	NO_SP	FALSE	FALSE
294	1044	A0A291U1E3|A0A291U1E3	16.54	27	14	14	0.666667	3.64159	6820000	83300000	4470000	59600000	59528	Malate synthase OS=Aeromonas sp. CA23 OX=2033032 GN=CK910_12845 PE=4 SV=1	K01638	M00012Â Glyoxylate cycleÂ (5)Â Â (complete 5/5)	tr|A0A291U1E3|A0A291U1E3_9GAMM	complete		13.33	3.7366	NO_SP	FALSE	FALSE
39	39	A0A291TZD1|A0A291TZD1	2.52	67	33	33	1.65	43.6684	1440000000	628000000	709000000	289000000	50367	Dihydrolipoyl dehydrogenase OS=Aeromonas sp. CA23 OX=2033032 GN=lpdA PE=3 SV=1	K00382	M00011Â Citrate cycle, second carbon oxidation, 2-oxoglutarate => oxaloacetateÂ (16)Â Â (complete 5/5)	tr|A0A291TZD1|A0A291TZD1_9GAMM	complete		0.41	-1.2863	NO_SP	FALSE	FALSE
55	54	A0A291TW78|A0A291TW78	3.29	85	26	26	2	99	4100000000	5180000000	2440000000	3090000000	32085	Malate dehydrogenase OS=Aeromonas sp. CA23 OX=2033032 GN=mdh PE=3 SV=1	K00024	M00011Â Citrate cycle, second carbon oxidation, 2-oxoglutarate => oxaloacetateÂ (16)Â Â (complete 5/5)	tr|A0A291TW78|A0A291TW78_9GAMM	complete	GH4.hmm	1.27	0.344828	NO_SP	FALSE	FALSE
55	54	A0A291TW78|A0A291TW78	3.29	85	26	26	2	99	4100000000	5180000000	2440000000	3090000000	32085	Malate dehydrogenase OS=Aeromonas sp. CA23 OX=2033032 GN=mdh PE=3 SV=1	K00024	M00011Â Citrate cycle, second carbon oxidation, 2-oxoglutarate => oxaloacetateÂ (16)Â Â (complete 5/5)	tr|A0A291TW78|A0A291TW78_9GAMM	complete	GH4.hmm	1.27	0.344828	NO_SP	FALSE	FALSE
55	54	A0A291TW78|A0A291TW78	3.29	85	26	26	2	99	4100000000	5180000000	2440000000	3090000000	32085	Malate dehydrogenase OS=Aeromonas sp. CA23 OX=2033032 GN=mdh PE=3 SV=1	K00024	M00011Â Citrate cycle, second carbon oxidation, 2-oxoglutarate => oxaloacetateÂ (16)Â Â (complete 5/5)	tr|A0A291TW78|A0A291TW78_9GAMM	complete	GH4.hmm	1.27	0.344828	NO_SP	FALSE	FALSE
74	46	A0A291U0W1|A0A291U0W1	0.26	48	24	24	0.827586	5.72336	577000000	425000000	251000000	197000000	65305	Fumarate reductase flavoprotein subunit OS=Aeromonas sp. CA23 OX=2033032 GN=CK910_10975 PE=3 SV=1	K00244	M00011Â Citrate cycle, second carbon oxidation, 2-oxoglutarate => oxaloacetateÂ (16)Â Â (complete 5/5)	tr|A0A291U0W1|A0A291U0W1_9GAMM	complete		0.78	-0.358454	NO_SP	FALSE	FALSE
87	37	A0A291U326|A0A291U326	5.02	56	30	30	1.15385	13.251	300000000	452000000	143000000	199000000	64370	Succinate dehydrogenase flavoprotein subunit OS=Aeromonas sp. CA23 OX=2033032 GN=CK910_15510 PE=3 SV=1	K00239	M00011Â Citrate cycle, second carbon oxidation, 2-oxoglutarate => oxaloacetateÂ (16)Â Â (complete 5/5)	tr|A0A291U326|A0A291U326_9GAMM	complete		1.39	0.475085	NO_SP	FALSE	FALSE
137	171	A0A291U344|A0A291U344	8.9	73	19	19	1.72727	52.367	826000000	2190000000	562000000	1330000000	29830	Succinate--CoA ligase [ADP-forming] subunit alpha OS=Aeromonas sp. CA23 OX=2033032 GN=sucD PE=3 SV=1	K01902	M00011Â Citrate cycle, second carbon oxidation, 2-oxoglutarate => oxaloacetateÂ (16)Â Â (complete 5/5)	tr|A0A291U344|A0A291U344_9GAMM	complete		2.37	1.24489	NO_SP	FALSE	FALSE
169	126	A0A291U0E3|A0A291U0E3	1.7	91	19	19	1.35714	21.7585	823000000	295000000	587000000	230000000	27688	Fumarate reductase iron-sulfur subunit OS=Aeromonas sp. CA23 OX=2033032 GN=CK910_10970 PE=3 SV=1	K00245	M00011Â Citrate cycle, second carbon oxidation, 2-oxoglutarate => oxaloacetateÂ (16)Â Â (complete 5/5)	tr|A0A291U0E3|A0A291U0E3_9GAMM	complete		0.39	-1.35845	NO_SP	FALSE	FALSE
171	73	A0A291U389|A0A291U389	0.34	51	20	20	0.952381	7.96151	168000000	180000000	88500000	81400000	54430	Fumarate hydratase class I OS=Aeromonas sp. CA23 OX=2033032 GN=CK910_15890 PE=3 SV=1	K01676	M00011Â Citrate cycle, second carbon oxidation, 2-oxoglutarate => oxaloacetateÂ (16)Â Â (complete 5/5)	tr|A0A291U389|A0A291U389_9GAMM	complete		0.92	-0.120294	NO_SP	FALSE	FALSE
179	109	A0A291U2D1|A0A291U2D1	7.44	59	19	19	1.05556	10.3646	134000000	289000000	77700000	175000000	41434	Succinate--CoA ligase [ADP-forming] subunit beta OS=Aeromonas sp. CA23 OX=2033032 GN=sucC PE=3 SV=1	K01903	M00011Â Citrate cycle, second carbon oxidation, 2-oxoglutarate => oxaloacetateÂ (16)Â Â (complete 5/5)	tr|A0A291U2D1|A0A291U2D1_9GAMM	complete		2.26	1.17632	NO_SP	FALSE	FALSE
193	304	A0A291U353|A0A291U353	13.46	52	14	14	0.777778	4.99484	246000000	319000000	150000000	240000000	42560	Dihydrolipoyllysine-residue succinyltransferase component of 2-oxoglutarate dehydrogenase complex OS=Aeromonas sp. CA23 OX=2033032 GN=CK910_15525 PE=3 SV=1	K00658	M00011Â Citrate cycle, second carbon oxidation, 2-oxoglutarate => oxaloacetateÂ (16)Â Â (complete 5/5)	tr|A0A291U353|A0A291U353_9GAMM	complete		1.6	0.678072	NO_SP	FALSE	FALSE
333	602	A0A291U2P2|A0A291U2P2	2.61	21	15	15	0.384615	1.42446	54100000	55400000	28300000	32200000	107417	Oxoglutarate dehydrogenase (succinyl-transferring) OS=Aeromonas sp. CA23 OX=2033032 GN=CK910_15520 PE=3 SV=1	K00164	M00011Â Citrate cycle, second carbon oxidation, 2-oxoglutarate => oxaloacetateÂ (16)Â Â (complete 5/5)	tr|A0A291U2P2|A0A291U2P2_9GAMM	complete		1.14	0.189034	NO_SP	FALSE	FALSE
495	289	A0A291U327|A0A291U327	0.09	59	10	10	0.769231	4.87802	169000000	159000000	131000000	122000000	26678	Succinate dehydrogenase iron-sulfur subunit OS=Aeromonas sp. CA23 OX=2033032 GN=sdhB PE=3 SV=1	K00240	M00011Â Citrate cycle, second carbon oxidation, 2-oxoglutarate => oxaloacetateÂ (16)Â Â (complete 5/5)	tr|A0A291U327|A0A291U327_9GAMM	complete		0.93	-0.104697	NO_SP	FALSE	FALSE
940	818	A0A291U003|A0A291U003	5.81	7	3	3	0.1875	0.539927	9230000	14400000	7660000	13900000	49322	Fumarate hydratase class II OS=Aeromonas sp. CA23 OX=2033032 GN=fumC PE=3 SV=1	K01679	M00011Â Citrate cycle, second carbon oxidation, 2-oxoglutarate => oxaloacetateÂ (16)Â Â (complete 5/5)	tr|A0A291U003|A0A291U003_9GAMM	complete		1.81	0.85599	NO_SP	FALSE	FALSE
1362	2138	A0A291U0G1|A0A291U0G1	13.47	14	2	2	0.5	2.16228	31900000	18700000	28400000	16300000	15058	Fumarate reductase subunit C OS=Aeromonas sp. CA23 OX=2033032 GN=frdC PE=3 SV=1	K00246	M00011Â Citrate cycle, second carbon oxidation, 2-oxoglutarate => oxaloacetateÂ (16)Â Â (complete 5/5)	tr|A0A291U0G1|A0A291U0G1_9GAMM	complete		0.58	-0.785875	NO_SP	FALSE	FALSE
15	12	A0A291TYV0|A0A291TYV0	2.92	68	55	55	1.375	22.7137	839000000	1160000000	373000000	503000000	93074	Aconitate hydratase B OS=Aeromonas sp. CA23 OX=2033032 GN=acnB PE=3 SV=1	K01682	M00010Â Citrate cycle, first carbon oxidation, oxaloacetate => 2-oxoglutarateÂ (4)Â Â (complete 3/3)	tr|A0A291TYV0|A0A291TYV0_9GAMM	complete		1.35	0.432959	NO_SP	FALSE	FALSE
41	23	A0A291U5U2|A0A291U5U2	1.73	76	37	37	1.7619	56.7969	1970000000	2280000000	712000000	753000000	45633	Isocitrate dehydrogenase [NADP] OS=Aeromonas sp. CA23 OX=2033032 GN=CK910_20860 PE=4 SV=1	K00031	M00010Â Citrate cycle, first carbon oxidation, oxaloacetate => 2-oxoglutarateÂ (4)Â Â (complete 3/3)	tr|A0A291U5U2|A0A291U5U2_9GAMM	complete		1.06	0.0840643	NO_SP	FALSE	FALSE
54	38	A0A291U2T3|A0A291U2T3	2.34	81	28	27	1.33333	20.5443	649000000	748000000	255000000	279000000	48026	Citrate synthase OS=Aeromonas sp. CA23 OX=2033032 GN=gltA PE=3 SV=1	K01647	M00010Â Citrate cycle, first carbon oxidation, oxaloacetate => 2-oxoglutarateÂ (4)Â Â (complete 3/3)	tr|A0A291U2T3|A0A291U2T3_9GAMM	complete		1.09	0.124328	NO_SP	FALSE	FALSE
376	478	A0A291U627|A0A291U627	4.75	36	16	15	1.23077	16.0125	127000000	304000000	79600000	187000000	36175	Isocitrate dehydrogenase OS=Aeromonas sp. CA23 OX=2033032 GN=CK910_22555 PE=4 SV=1	K00030	M00010Â Citrate cycle, first carbon oxidation, oxaloacetate => 2-oxoglutarateÂ (4)Â Â (complete 3/3)	tr|A0A291U627|A0A291U627_9GAMM	complete		2.35	1.23266	NO_SP	FALSE	FALSE
15	12	A0A291TYV0|A0A291TYV0	2.92	68	55	55	1.375	22.7137	839000000	1160000000	373000000	503000000	93074	Aconitate hydratase B OS=Aeromonas sp. CA23 OX=2033032 GN=acnB PE=3 SV=1	K01682	M00009Â Citrate cycle (TCA cycle, Krebs cycle)Â (20)Â Â (complete 8/8)	tr|A0A291TYV0|A0A291TYV0_9GAMM	complete		1.35	0.432959	NO_SP	FALSE	FALSE
39	39	A0A291TZD1|A0A291TZD1	2.52	67	33	33	1.65	43.6684	1440000000	628000000	709000000	289000000	50367	Dihydrolipoyl dehydrogenase OS=Aeromonas sp. CA23 OX=2033032 GN=lpdA PE=3 SV=1	K00382	M00009Â Citrate cycle (TCA cycle, Krebs cycle)Â (20)Â Â (complete 8/8)	tr|A0A291TZD1|A0A291TZD1_9GAMM	complete		0.41	-1.2863	NO_SP	FALSE	FALSE
41	23	A0A291U5U2|A0A291U5U2	1.73	76	37	37	1.7619	56.7969	1970000000	2280000000	712000000	753000000	45633	Isocitrate dehydrogenase [NADP] OS=Aeromonas sp. CA23 OX=2033032 GN=CK910_20860 PE=4 SV=1	K00031	M00009Â Citrate cycle (TCA cycle, Krebs cycle)Â (20)Â Â (complete 8/8)	tr|A0A291U5U2|A0A291U5U2_9GAMM	complete		1.06	0.0840643	NO_SP	FALSE	FALSE
54	38	A0A291U2T3|A0A291U2T3	2.34	81	28	27	1.33333	20.5443	649000000	748000000	255000000	279000000	48026	Citrate synthase OS=Aeromonas sp. CA23 OX=2033032 GN=gltA PE=3 SV=1	K01647	M00009Â Citrate cycle (TCA cycle, Krebs cycle)Â (20)Â Â (complete 8/8)	tr|A0A291U2T3|A0A291U2T3_9GAMM	complete		1.09	0.124328	NO_SP	FALSE	FALSE
55	54	A0A291TW78|A0A291TW78	3.29	85	26	26	2	99	4100000000	5180000000	2440000000	3090000000	32085	Malate dehydrogenase OS=Aeromonas sp. CA23 OX=2033032 GN=mdh PE=3 SV=1	K00024	M00009Â Citrate cycle (TCA cycle, Krebs cycle)Â (20)Â Â (complete 8/8)	tr|A0A291TW78|A0A291TW78_9GAMM	complete	GH4.hmm	1.27	0.344828	NO_SP	FALSE	FALSE
55	54	A0A291TW78|A0A291TW78	3.29	85	26	26	2	99	4100000000	5180000000	2440000000	3090000000	32085	Malate dehydrogenase OS=Aeromonas sp. CA23 OX=2033032 GN=mdh PE=3 SV=1	K00024	M00009Â Citrate cycle (TCA cycle, Krebs cycle)Â (20)Â Â (complete 8/8)	tr|A0A291TW78|A0A291TW78_9GAMM	complete	GH4.hmm	1.27	0.344828	NO_SP	FALSE	FALSE
55	54	A0A291TW78|A0A291TW78	3.29	85	26	26	2	99	4100000000	5180000000	2440000000	3090000000	32085	Malate dehydrogenase OS=Aeromonas sp. CA23 OX=2033032 GN=mdh PE=3 SV=1	K00024	M00009Â Citrate cycle (TCA cycle, Krebs cycle)Â (20)Â Â (complete 8/8)	tr|A0A291TW78|A0A291TW78_9GAMM	complete	GH4.hmm	1.27	0.344828	NO_SP	FALSE	FALSE
74	46	A0A291U0W1|A0A291U0W1	0.26	48	24	24	0.827586	5.72336	577000000	425000000	251000000	197000000	65305	Fumarate reductase flavoprotein subunit OS=Aeromonas sp. CA23 OX=2033032 GN=CK910_10975 PE=3 SV=1	K00244	M00009Â Citrate cycle (TCA cycle, Krebs cycle)Â (20)Â Â (complete 8/8)	tr|A0A291U0W1|A0A291U0W1_9GAMM	complete		0.78	-0.358454	NO_SP	FALSE	FALSE
87	37	A0A291U326|A0A291U326	5.02	56	30	30	1.15385	13.251	300000000	452000000	143000000	199000000	64370	Succinate dehydrogenase flavoprotein subunit OS=Aeromonas sp. CA23 OX=2033032 GN=CK910_15510 PE=3 SV=1	K00239	M00009Â Citrate cycle (TCA cycle, Krebs cycle)Â (20)Â Â (complete 8/8)	tr|A0A291U326|A0A291U326_9GAMM	complete		1.39	0.475085	NO_SP	FALSE	FALSE
137	171	A0A291U344|A0A291U344	8.9	73	19	19	1.72727	52.367	826000000	2190000000	562000000	1330000000	29830	Succinate--CoA ligase [ADP-forming] subunit alpha OS=Aeromonas sp. CA23 OX=2033032 GN=sucD PE=3 SV=1	K01902	M00009Â Citrate cycle (TCA cycle, Krebs cycle)Â (20)Â Â (complete 8/8)	tr|A0A291U344|A0A291U344_9GAMM	complete		2.37	1.24489	NO_SP	FALSE	FALSE
169	126	A0A291U0E3|A0A291U0E3	1.7	91	19	19	1.35714	21.7585	823000000	295000000	587000000	230000000	27688	Fumarate reductase iron-sulfur subunit OS=Aeromonas sp. CA23 OX=2033032 GN=CK910_10970 PE=3 SV=1	K00245	M00009Â Citrate cycle (TCA cycle, Krebs cycle)Â (20)Â Â (complete 8/8)	tr|A0A291U0E3|A0A291U0E3_9GAMM	complete		0.39	-1.35845	NO_SP	FALSE	FALSE
171	73	A0A291U389|A0A291U389	0.34	51	20	20	0.952381	7.96151	168000000	180000000	88500000	81400000	54430	Fumarate hydratase class I OS=Aeromonas sp. CA23 OX=2033032 GN=CK910_15890 PE=3 SV=1	K01676	M00009Â Citrate cycle (TCA cycle, Krebs cycle)Â (20)Â Â (complete 8/8)	tr|A0A291U389|A0A291U389_9GAMM	complete		0.92	-0.120294	NO_SP	FALSE	FALSE
179	109	A0A291U2D1|A0A291U2D1	7.44	59	19	19	1.05556	10.3646	134000000	289000000	77700000	175000000	41434	Succinate--CoA ligase [ADP-forming] subunit beta OS=Aeromonas sp. CA23 OX=2033032 GN=sucC PE=3 SV=1	K01903	M00009Â Citrate cycle (TCA cycle, Krebs cycle)Â (20)Â Â (complete 8/8)	tr|A0A291U2D1|A0A291U2D1_9GAMM	complete		2.26	1.17632	NO_SP	FALSE	FALSE
193	304	A0A291U353|A0A291U353	13.46	52	14	14	0.777778	4.99484	246000000	319000000	150000000	240000000	42560	Dihydrolipoyllysine-residue succinyltransferase component of 2-oxoglutarate dehydrogenase complex OS=Aeromonas sp. CA23 OX=2033032 GN=CK910_15525 PE=3 SV=1	K00658	M00009Â Citrate cycle (TCA cycle, Krebs cycle)Â (20)Â Â (complete 8/8)	tr|A0A291U353|A0A291U353_9GAMM	complete		1.6	0.678072	NO_SP	FALSE	FALSE
333	602	A0A291U2P2|A0A291U2P2	2.61	21	15	15	0.384615	1.42446	54100000	55400000	28300000	32200000	107417	Oxoglutarate dehydrogenase (succinyl-transferring) OS=Aeromonas sp. CA23 OX=2033032 GN=CK910_15520 PE=3 SV=1	K00164	M00009Â Citrate cycle (TCA cycle, Krebs cycle)Â (20)Â Â (complete 8/8)	tr|A0A291U2P2|A0A291U2P2_9GAMM	complete		1.14	0.189034	NO_SP	FALSE	FALSE
376	478	A0A291U627|A0A291U627	4.75	36	16	15	1.23077	16.0125	127000000	304000000	79600000	187000000	36175	Isocitrate dehydrogenase OS=Aeromonas sp. CA23 OX=2033032 GN=CK910_22555 PE=4 SV=1	K00030	M00009Â Citrate cycle (TCA cycle, Krebs cycle)Â (20)Â Â (complete 8/8)	tr|A0A291U627|A0A291U627_9GAMM	complete		2.35	1.23266	NO_SP	FALSE	FALSE
495	289	A0A291U327|A0A291U327	0.09	59	10	10	0.769231	4.87802	169000000	159000000	131000000	122000000	26678	Succinate dehydrogenase iron-sulfur subunit OS=Aeromonas sp. CA23 OX=2033032 GN=sdhB PE=3 SV=1	K00240	M00009Â Citrate cycle (TCA cycle, Krebs cycle)Â (20)Â Â (complete 8/8)	tr|A0A291U327|A0A291U327_9GAMM	complete		0.93	-0.104697	NO_SP	FALSE	FALSE
940	818	A0A291U003|A0A291U003	5.81	7	3	3	0.1875	0.539927	9230000	14400000	7660000	13900000	49322	Fumarate hydratase class II OS=Aeromonas sp. CA23 OX=2033032 GN=fumC PE=3 SV=1	K01679	M00009Â Citrate cycle (TCA cycle, Krebs cycle)Â (20)Â Â (complete 8/8)	tr|A0A291U003|A0A291U003_9GAMM	complete		1.81	0.85599	NO_SP	FALSE	FALSE
1362	2138	A0A291U0G1|A0A291U0G1	13.47	14	2	2	0.5	2.16228	31900000	18700000	28400000	16300000	15058	Fumarate reductase subunit C OS=Aeromonas sp. CA23 OX=2033032 GN=frdC PE=3 SV=1	K00246	M00009Â Citrate cycle (TCA cycle, Krebs cycle)Â (20)Â Â (complete 8/8)	tr|A0A291U0G1|A0A291U0G1_9GAMM	complete		0.58	-0.785875	NO_SP	FALSE	FALSE
876	781	A0A291TWZ9|A0A291TWZ9	12.51	48	5	5	0.555556	2.59381	48100000	16900000	45700000	16300000	21961	2-dehydro-3-deoxy-phosphogluconate aldolase OS=Aeromonas sp. CA23 OX=2033032 GN=CK910_03615 PE=3 SV=1	K01625	M00008Â Entner-Doudoroff pathway, glucose-6P => glyceraldehyde-3P + pyruvateÂ (3)Â Â (1 block missing 3/4)	tr|A0A291TWZ9|A0A291TWZ9_9GAMM	incomplete		0.36	-1.47393	NO_SP	FALSE	FALSE
63	13	A0A291U130|A0A291U130	0.42	68	33	33	1.32	19.893	475000000	200000000	177000000	80200000	71715	Transketolase OS=Aeromonas sp. CA23 OX=2033032 GN=tkt PE=3 SV=1	K00615	M00007Â Pentose phosphate pathway, non-oxidative phase, fructose 6P => ribose 5PÂ (4)Â Â (complete 4/4)	tr|A0A291U130|A0A291U130_9GAMM	complete		0.45	-1.152	NO_SP	FALSE	FALSE
92	93	A0A291U126|A0A291U126	2.92	82	24	24	1.09091	11.3285	192000000	209000000	73900000	87200000	35229	Transaldolase OS=Aeromonas sp. CA23 OX=2033032 GN=tal PE=3 SV=1	K00616	M00007Â Pentose phosphate pathway, non-oxidative phase, fructose 6P => ribose 5PÂ (4)Â Â (complete 4/4)	tr|A0A291U126|A0A291U126_9GAMM	complete		1.18	0.238787	NO_SP	FALSE	FALSE
456	502	A0A291U1X6|A0A291U1X6	2.27	53	10	10	0.909091	7.11131	68300000	67100000	35700000	34400000	22843	Ribose-5-phosphate isomerase A OS=Aeromonas sp. CA23 OX=2033032 GN=rpiA PE=3 SV=1	K01807	M00007Â Pentose phosphate pathway, non-oxidative phase, fructose 6P => ribose 5PÂ (4)Â Â (complete 4/4)	tr|A0A291U1X6|A0A291U1X6_9GAMM	complete		0.96	-0.0588937	NO_SP	FALSE	FALSE
485	488	A0A291U0W6|A0A291U0W6	8.4	62	8	8	0.888889	6.74264	202000000	127000000	157000000	102000000	24479	Ribulose-phosphate 3-epimerase OS=Aeromonas sp. CA23 OX=2033032 GN=rpe PE=3 SV=1	K01783	M00007Â Pentose phosphate pathway, non-oxidative phase, fructose 6P => ribose 5PÂ (4)Â Â (complete 4/4)	tr|A0A291U0W6|A0A291U0W6_9GAMM	complete		0.65	-0.621488	NO_SP	FALSE	FALSE
111	153	A0A291U105|A0A291U105	4.27	71	24	24	2	99	3430000000	1330000000	2650000000	1020000000	34227	Ribose-phosphate pyrophosphokinase OS=Aeromonas sp. CA23 OX=2033032 GN=prs PE=3 SV=1	K00948	M00005Â PRPP biosynthesis, ribose 5P => PRPPÂ (1)Â Â (complete 1/1)	tr|A0A291U105|A0A291U105_9GAMM	complete		0.38	-1.39593	NO_SP	FALSE	FALSE
19	32	A0A291TX57|A0A291TX57	11.01	67	36	36	1.5	30.6228	1760000000	302000000	674000000	123000000	61150	Glucose-6-phosphate isomerase OS=Aeromonas sp. CA23 OX=2033032 GN=pgi PE=3 SV=1	K01810	M00004Â Pentose phosphate pathway (Pentose phosphate cycle)Â (6)Â Â (2 blocks missing 5/7)	tr|A0A291TX57|A0A291TX57_9GAMM	incomplete		0.18	-2.47393	NO_SP	FALSE	FALSE
63	13	A0A291U130|A0A291U130	0.42	68	33	33	1.32	19.893	475000000	200000000	177000000	80200000	71715	Transketolase OS=Aeromonas sp. CA23 OX=2033032 GN=tkt PE=3 SV=1	K00615	M00004Â Pentose phosphate pathway (Pentose phosphate cycle)Â (6)Â Â (2 blocks missing 5/7)	tr|A0A291U130|A0A291U130_9GAMM	incomplete		0.45	-1.152	NO_SP	FALSE	FALSE
92	93	A0A291U126|A0A291U126	2.92	82	24	24	1.09091	11.3285	192000000	209000000	73900000	87200000	35229	Transaldolase OS=Aeromonas sp. CA23 OX=2033032 GN=tal PE=3 SV=1	K00616	M00004Â Pentose phosphate pathway (Pentose phosphate cycle)Â (6)Â Â (2 blocks missing 5/7)	tr|A0A291U126|A0A291U126_9GAMM	incomplete		1.18	0.238787	NO_SP	FALSE	FALSE
456	502	A0A291U1X6|A0A291U1X6	2.27	53	10	10	0.909091	7.11131	68300000	67100000	35700000	34400000	22843	Ribose-5-phosphate isomerase A OS=Aeromonas sp. CA23 OX=2033032 GN=rpiA PE=3 SV=1	K01807	M00004Â Pentose phosphate pathway (Pentose phosphate cycle)Â (6)Â Â (2 blocks missing 5/7)	tr|A0A291U1X6|A0A291U1X6_9GAMM	incomplete		0.96	-0.0588937	NO_SP	FALSE	FALSE
485	488	A0A291U0W6|A0A291U0W6	8.4	62	8	8	0.888889	6.74264	202000000	127000000	157000000	102000000	24479	Ribulose-phosphate 3-epimerase OS=Aeromonas sp. CA23 OX=2033032 GN=rpe PE=3 SV=1	K01783	M00004Â Pentose phosphate pathway (Pentose phosphate cycle)Â (6)Â Â (2 blocks missing 5/7)	tr|A0A291U0W6|A0A291U0W6_9GAMM	incomplete		0.65	-0.621488	NO_SP	FALSE	FALSE
2	40	A0A291TZV8|A0A291TZV8	26.74	98	55	55	3.66667	4640.59	23200000000	5190000000	7890000000	1790000000	35049	Glyceraldehyde-3-phosphate dehydrogenase OS=Aeromonas sp. CA23 OX=2033032 GN=gap PE=3 SV=1	K00134	M00003Â Gluconeogenesis, oxaloacetate => fructose-6PÂ (10)Â Â (complete 7/7)	tr|A0A291U0G4|A0A291U0G4_9GAMM, tr|A0A291TZV8|A0A291TZV8_9GAMM	complete		0.23	-2.12029	NO_SP	FALSE	CORRECT
9	5	A0A291TW56|A0A291TW56	11.52	88	37	37	2.3125	204.353	6690000000	1850000000	3660000000	1080000000	45692	Enolase OS=Aeromonas sp. CA23 OX=2033032 GN=eno PE=3 SV=1	K01689	M00003Â Gluconeogenesis, oxaloacetate => fructose-6PÂ (10)Â Â (complete 7/7)	tr|A0A291TW56|A0A291TW56_9GAMM	complete		0.3	-1.73697	NO_SP	FALSE	FALSE
47	59	A0A291TVE9|A0A291TVE9	13.58	77	39	39	2.6	397.107	9140000000	1450000000	5840000000	1050000000	38947	Fructose-bisphosphate aldolase OS=Aeromonas sp. CA23 OX=2033032 GN=CK910_01070 PE=3 SV=1	K01624	M00003Â Gluconeogenesis, oxaloacetate => fructose-6PÂ (10)Â Â (complete 7/7)	tr|A0A291TVE9|A0A291TVE9_9GAMM	complete		0.18	-2.47393	NO_SP	FALSE	FALSE
68	15	A0A291TW01|A0A291TW01	12.91	89	35	35	1.84211	68.5193	2560000000	627000000	1270000000	326000000	40465	Phosphoglycerate kinase OS=Aeromonas sp. CA23 OX=2033032 GN=pgk PE=3 SV=1	K00927	M00003Â Gluconeogenesis, oxaloacetate => fructose-6PÂ (10)Â Â (complete 7/7)	tr|A0A291TW01|A0A291TW01_9GAMM	complete		0.26	-1.94342	NO_SP	FALSE	FALSE
204	211	A0A291U3C0|A0A291U3C0	3.21	66	15	15	1.36364	22.1013	1180000000	582000000	676000000	300000000	26017	Triosephosphate isomerase OS=Aeromonas sp. CA23 OX=2033032 GN=tpiA PE=3 SV=1	K01803	M00003Â Gluconeogenesis, oxaloacetate => fructose-6PÂ (10)Â Â (complete 7/7)	tr|A0A291U0M1|A0A291U0M1_9GAMM, tr|A0A291U3C0|A0A291U3C0_9GAMM	complete		0.44	-1.18442	NO_SP	FALSE	FALSE
418	263	A0A291U3V8|A0A291U3V8	13.84	50	14	14	1	9	141000000	39300000	103000000	28300000	37961	Fructose-1 6-bisphosphatase class 1 OS=Aeromonas sp. CA23 OX=2033032 GN=fbp PE=3 SV=1	K03841	M00003Â Gluconeogenesis, oxaloacetate => fructose-6PÂ (10)Â Â (complete 7/7)	tr|A0A291U3V8|A0A291U3V8_9GAMM	complete		0.27	-1.88897	NO_SP	FALSE	FALSE
457	161	A0A291TWE8|A0A291TWE8	2.89	40	15	15	0.9375	7.65964	81300000	43800000	57800000	29800000	35793	Fructose-1 6-bisphosphatase OS=Aeromonas sp. CA23 OX=2033032 GN=glpX PE=3 SV=1	K02446	M00003Â Gluconeogenesis, oxaloacetate => fructose-6PÂ (10)Â Â (complete 7/7)	tr|A0A291TWE8|A0A291TWE8_9GAMM	complete		0.52	-0.943416	NO_SP	FALSE	FALSE
866	593	A0A291U0G4|A0A291U0G4	0.77	20	5	5	0.384615	1.42446	15100000	8980000	11700000	8470000	51830	Glyceraldehyde-3-phosphate dehydrogenase OS=Aeromonas sp. CA23 OX=2033032 GN=CK910_10235 PE=3 SV=1	K00134	M00003Â Gluconeogenesis, oxaloacetate => fructose-6PÂ (10)Â Â (complete 7/7)	tr|A0A291U0G4|A0A291U0G4_9GAMM, tr|A0A291TZV8|A0A291TZV8_9GAMM	complete		0.72	-0.473931	NO_SP	FALSE	FALSE
1248	878	A0A291TW09|A0A291TW09	12.23	9	4	4	0.133333	0.359356	4410000	132000	4110000	132000	59765	Phosphoenolpyruvate carboxykinase (ATP) OS=Aeromonas sp. CA23 OX=2033032 GN=pckA PE=3 SV=1	K01610	M00003Â Gluconeogenesis, oxaloacetate => fructose-6PÂ (10)Â Â (complete 7/7)	tr|A0A291TW09|A0A291TW09_9GAMM	complete		0.03	-5.05889	NO_SP	FALSE	FALSE
1291	1450	A0A291U0M1|A0A291U0M1	4.98	21	4	4	0.307692	1.03092	19300000	12800000	19200000	12600000	27339	Triosephosphate isomerase OS=Aeromonas sp. CA23 OX=2033032 GN=tpiA PE=3 SV=1	K01803	M00003Â Gluconeogenesis, oxaloacetate => fructose-6PÂ (10)Â Â (complete 7/7)	tr|A0A291U0M1|A0A291U0M1_9GAMM, tr|A0A291U3C0|A0A291U3C0_9GAMM	complete		0.66	-0.599462	NO_SP	FALSE	FALSE
2	40	A0A291TZV8|A0A291TZV8	26.74	98	55	55	3.66667	4640.59	23200000000	5190000000	7890000000	1790000000	35049	Glyceraldehyde-3-phosphate dehydrogenase OS=Aeromonas sp. CA23 OX=2033032 GN=gap PE=3 SV=1	K00134	M00002Â Glycolysis, core module involving three-carbon compoundsÂ (7)Â Â (complete 5/5)	tr|A0A291U0G4|A0A291U0G4_9GAMM, tr|A0A291TZV8|A0A291TZV8_9GAMM	complete		0.23	-2.12029	NO_SP	FALSE	CORRECT
9	5	A0A291TW56|A0A291TW56	11.52	88	37	37	2.3125	204.353	6690000000	1850000000	3660000000	1080000000	45692	Enolase OS=Aeromonas sp. CA23 OX=2033032 GN=eno PE=3 SV=1	K01689	M00002Â Glycolysis, core module involving three-carbon compoundsÂ (7)Â Â (complete 5/5)	tr|A0A291TW56|A0A291TW56_9GAMM	complete		0.3	-1.73697	NO_SP	FALSE	FALSE
16	6	A0A291U113|A0A291U113	17.12	75	47	47	1.80769	63.2233	3750000000	1250000000	1930000000	697000000	50215	Pyruvate kinase OS=Aeromonas sp. CA23 OX=2033032 GN=CK910_11760 PE=3 SV=1	K00873	M00002Â Glycolysis, core module involving three-carbon compoundsÂ (7)Â Â (complete 5/5)	tr|A0A291U5R3|A0A291U5R3_9GAMM, tr|A0A291U113|A0A291U113_9GAMM	complete		0.36	-1.47393	NO_SP	FALSE	FALSE
46	53	A0A291U5R3|A0A291U5R3	25.68	69	34	34	1.47826	29.0788	1190000000	330000000	758000000	212000000	51430	Pyruvate kinase OS=Aeromonas sp. CA23 OX=2033032 GN=pyk PE=3 SV=1	K00873	M00002Â Glycolysis, core module involving three-carbon compoundsÂ (7)Â Â (complete 5/5)	tr|A0A291U5R3|A0A291U5R3_9GAMM, tr|A0A291U113|A0A291U113_9GAMM	complete		0.28	-1.8365	NO_SP	FALSE	CORRECT
68	15	A0A291TW01|A0A291TW01	12.91	89	35	35	1.84211	68.5193	2560000000	627000000	1270000000	326000000	40465	Phosphoglycerate kinase OS=Aeromonas sp. CA23 OX=2033032 GN=pgk PE=3 SV=1	K00927	M00002Â Glycolysis, core module involving three-carbon compoundsÂ (7)Â Â (complete 5/5)	tr|A0A291TW01|A0A291TW01_9GAMM	complete		0.26	-1.94342	NO_SP	FALSE	FALSE
204	211	A0A291U3C0|A0A291U3C0	3.21	66	15	15	1.36364	22.1013	1180000000	582000000	676000000	300000000	26017	Triosephosphate isomerase OS=Aeromonas sp. CA23 OX=2033032 GN=tpiA PE=3 SV=1	K01803	M00002Â Glycolysis, core module involving three-carbon compoundsÂ (7)Â Â (complete 5/5)	tr|A0A291U0M1|A0A291U0M1_9GAMM, tr|A0A291U3C0|A0A291U3C0_9GAMM	complete		0.44	-1.18442	NO_SP	FALSE	FALSE
866	593	A0A291U0G4|A0A291U0G4	0.77	20	5	5	0.384615	1.42446	15100000	8980000	11700000	8470000	51830	Glyceraldehyde-3-phosphate dehydrogenase OS=Aeromonas sp. CA23 OX=2033032 GN=CK910_10235 PE=3 SV=1	K00134	M00002Â Glycolysis, core module involving three-carbon compoundsÂ (7)Â Â (complete 5/5)	tr|A0A291U0G4|A0A291U0G4_9GAMM, tr|A0A291TZV8|A0A291TZV8_9GAMM	complete		0.72	-0.473931	NO_SP	FALSE	FALSE
1291	1450	A0A291U0M1|A0A291U0M1	4.98	21	4	4	0.307692	1.03092	19300000	12800000	19200000	12600000	27339	Triosephosphate isomerase OS=Aeromonas sp. CA23 OX=2033032 GN=tpiA PE=3 SV=1	K01803	M00002Â Glycolysis, core module involving three-carbon compoundsÂ (7)Â Â (complete 5/5)	tr|A0A291U0M1|A0A291U0M1_9GAMM, tr|A0A291U3C0|A0A291U3C0_9GAMM	complete		0.66	-0.599462	NO_SP	FALSE	FALSE
2	40	A0A291TZV8|A0A291TZV8	26.74	98	55	55	3.66667	4640.59	23200000000	5190000000	7890000000	1790000000	35049	Glyceraldehyde-3-phosphate dehydrogenase OS=Aeromonas sp. CA23 OX=2033032 GN=gap PE=3 SV=1	K00134	M00001Â Glycolysis (Embden-Meyerhof pathway), glucose => pyruvateÂ (12)Â Â (complete 9/9)	tr|A0A291U0G4|A0A291U0G4_9GAMM, tr|A0A291TZV8|A0A291TZV8_9GAMM	complete		0.23	-2.12029	NO_SP	FALSE	CORRECT
9	5	A0A291TW56|A0A291TW56	11.52	88	37	37	2.3125	204.353	6690000000	1850000000	3660000000	1080000000	45692	Enolase OS=Aeromonas sp. CA23 OX=2033032 GN=eno PE=3 SV=1	K01689	M00001Â Glycolysis (Embden-Meyerhof pathway), glucose => pyruvateÂ (12)Â Â (complete 9/9)	tr|A0A291TW56|A0A291TW56_9GAMM	complete		0.3	-1.73697	NO_SP	FALSE	FALSE
16	6	A0A291U113|A0A291U113	17.12	75	47	47	1.80769	63.2233	3750000000	1250000000	1930000000	697000000	50215	Pyruvate kinase OS=Aeromonas sp. CA23 OX=2033032 GN=CK910_11760 PE=3 SV=1	K00873	M00001Â Glycolysis (Embden-Meyerhof pathway), glucose => pyruvateÂ (12)Â Â (complete 9/9)	tr|A0A291U5R3|A0A291U5R3_9GAMM, tr|A0A291U113|A0A291U113_9GAMM	complete		0.36	-1.47393	NO_SP	FALSE	FALSE
19	32	A0A291TX57|A0A291TX57	11.01	67	36	36	1.5	30.6228	1760000000	302000000	674000000	123000000	61150	Glucose-6-phosphate isomerase OS=Aeromonas sp. CA23 OX=2033032 GN=pgi PE=3 SV=1	K01810	M00001Â Glycolysis (Embden-Meyerhof pathway), glucose => pyruvateÂ (12)Â Â (complete 9/9)	tr|A0A291TX57|A0A291TX57_9GAMM	complete		0.18	-2.47393	NO_SP	FALSE	FALSE
46	53	A0A291U5R3|A0A291U5R3	25.68	69	34	34	1.47826	29.0788	1190000000	330000000	758000000	212000000	51430	Pyruvate kinase OS=Aeromonas sp. CA23 OX=2033032 GN=pyk PE=3 SV=1	K00873	M00001Â Glycolysis (Embden-Meyerhof pathway), glucose => pyruvateÂ (12)Â Â (complete 9/9)	tr|A0A291U5R3|A0A291U5R3_9GAMM, tr|A0A291U113|A0A291U113_9GAMM	complete		0.28	-1.8365	NO_SP	FALSE	CORRECT
47	59	A0A291TVE9|A0A291TVE9	13.58	77	39	39	2.6	397.107	9140000000	1450000000	5840000000	1050000000	38947	Fructose-bisphosphate aldolase OS=Aeromonas sp. CA23 OX=2033032 GN=CK910_01070 PE=3 SV=1	K01624	M00001Â Glycolysis (Embden-Meyerhof pathway), glucose => pyruvateÂ (12)Â Â (complete 9/9)	tr|A0A291TVE9|A0A291TVE9_9GAMM	complete		0.18	-2.47393	NO_SP	FALSE	FALSE
68	15	A0A291TW01|A0A291TW01	12.91	89	35	35	1.84211	68.5193	2560000000	627000000	1270000000	326000000	40465	Phosphoglycerate kinase OS=Aeromonas sp. CA23 OX=2033032 GN=pgk PE=3 SV=1	K00927	M00001Â Glycolysis (Embden-Meyerhof pathway), glucose => pyruvateÂ (12)Â Â (complete 9/9)	tr|A0A291TW01|A0A291TW01_9GAMM	complete		0.26	-1.94342	NO_SP	FALSE	FALSE
204	211	A0A291U3C0|A0A291U3C0	3.21	66	15	15	1.36364	22.1013	1180000000	582000000	676000000	300000000	26017	Triosephosphate isomerase OS=Aeromonas sp. CA23 OX=2033032 GN=tpiA PE=3 SV=1	K01803	M00001Â Glycolysis (Embden-Meyerhof pathway), glucose => pyruvateÂ (12)Â Â (complete 9/9)	tr|A0A291U0M1|A0A291U0M1_9GAMM, tr|A0A291U3C0|A0A291U3C0_9GAMM	complete		0.44	-1.18442	NO_SP	FALSE	FALSE
223	151	A0A291U3D1|A0A291U3D1	1.52	47	14	14	0.933333	7.57696	469000000	274000000	311000000	177000000	34827	ATP-dependent 6-phosphofructokinase OS=Aeromonas sp. CA23 OX=2033032 GN=pfkA PE=3 SV=1	K00850	M00001Â Glycolysis (Embden-Meyerhof pathway), glucose => pyruvateÂ (12)Â Â (complete 9/9)	tr|A0A291U3D1|A0A291U3D1_9GAMM	complete		0.57	-0.810966	NO_SP	FALSE	FALSE
674	316	A0A291U630|A0A291U630	16.38	36	11	11	0.846154	6.01704	159000000	34300000	133000000	30100000	34170	Glucokinase OS=Aeromonas sp. CA23 OX=2033032 GN=glk PE=3 SV=1	K00845	M00001Â Glycolysis (Embden-Meyerhof pathway), glucose => pyruvateÂ (12)Â Â (complete 9/9)	tr|A0A291U630|A0A291U630_9GAMM	complete		0.23	-2.12029	NO_SP	FALSE	FALSE
866	593	A0A291U0G4|A0A291U0G4	0.77	20	5	5	0.384615	1.42446	15100000	8980000	11700000	8470000	51830	Glyceraldehyde-3-phosphate dehydrogenase OS=Aeromonas sp. CA23 OX=2033032 GN=CK910_10235 PE=3 SV=1	K00134	M00001Â Glycolysis (Embden-Meyerhof pathway), glucose => pyruvateÂ (12)Â Â (complete 9/9)	tr|A0A291U0G4|A0A291U0G4_9GAMM, tr|A0A291TZV8|A0A291TZV8_9GAMM	complete		0.72	-0.473931	NO_SP	FALSE	FALSE
1291	1450	A0A291U0M1|A0A291U0M1	4.98	21	4	4	0.307692	1.03092	19300000	12800000	19200000	12600000	27339	Triosephosphate isomerase OS=Aeromonas sp. CA23 OX=2033032 GN=tpiA PE=3 SV=1	K01803	M00001Â Glycolysis (Embden-Meyerhof pathway), glucose => pyruvateÂ (12)Â Â (complete 9/9)	tr|A0A291U0M1|A0A291U0M1_9GAMM, tr|A0A291U3C0|A0A291U3C0_9GAMM	complete		0.66	-0.599462	NO_SP	FALSE	FALSE
1458	1296	A0A291TVM8|A0A291TVM8	0	18	2	2	0.25	0.778279	1750000	700000	1750000	700000	26904	ROK family protein OS=Aeromonas sp. CA23 OX=2033032 GN=CK910_00390 PE=4 SV=1	K00886	M00001Â Glycolysis (Embden-Meyerhof pathway), glucose => pyruvateÂ (12)Â Â (complete 9/9)	tr|A0A291TVM8|A0A291TVM8_9GAMM	complete		0.4	-1.32193	NO_SP	FALSE	FALSE
1	1	A0A291U2U3|A0A291U2U3	8.64	77	74	73	2.05556	112.646	2780000000	165000000	507000000	35900000	85091	Formate acetyltransferase OS=Aeromonas sp. CA23 OX=2033032 GN=pflB PE=3 SV=1	K00656					0.07	-3.8365	NO_SP	FALSE	FALSE
3	822	A0A291U507|A0A291U507	38.83	73	72	72	1.5	30.6228	83300000	7330000000	19200000	2700000000	98146	Beta-N-acetylhexosaminidase OS=Aeromonas sp. CA23 OX=2033032 GN=CK910_20330 PE=3 SV=1	K12373				GH20.hmm	64	6	SP	CORRECT	CORRECT
4	42	A0A291U707|A0A291U707	21.05	75	35	35	1.59091	37.986	21300000000	11200000000	12900000000	6750000000	53143	Maltoporin OS=Aeromonas sp. CA23 OX=2033032 GN=lamB PE=2 SV=1	K02024					0.53	-0.915936	NO_SP	FALSE	FALSE
5	2	A0A291U2E6|A0A291U2E6	9.01	85	59	59	1.73529	53.3618	2730000000	7090000000	1450000000	3750000000	60672	Oligopeptide ABC transporter substrate-binding protein OppA OS=Aeromonas sp. CA23 OX=2033032 GN=CK910_14655 PE=4 SV=1	K15580					2.58	1.36737	SP	FALSE	FALSE
6	3	A0A291TY56|A0A291TY56	3.46	84	71	71	1.65116	43.7881	2140000000	1390000000	740000000	492000000	95491	Chaperone protein ClpB OS=Aeromonas sp. CA23 OX=2033032 GN=clpB PE=3 SV=1	K03695					0.66	-0.599462	NO_SP	FALSE	FALSE
7	70	A0A291TY84|A0A291TY84	23.43	66	38	38	1.58333	37.3119	2940000000	5610000000	1210000000	2600000000	83078	Lipase OS=Aeromonas sp. CA23 OX=2033032 GN=CK910_05050 PE=4 SV=1						2.14	1.09761	LIPO	FALSE	CORRECT
8	18	A0A291U1E9|A0A291U1E9	17.66	70	48	48	1.54839	34.3498	4160000000	1970000000	1910000000	867000000	69442	Chaperone protein DnaK OS=Aeromonas sp. CA23 OX=2033032 GN=dnaK PE=2 SV=1	K04043					0.45	-1.152	NO_SP	FALSE	FALSE
10	25	A0A291U5Q7|A0A291U5Q7	1.58	98	32	32	2.13333	134.936	19500000000	20100000000	6840000000	5700000000	35144	Porin OmpA OS=Aeromonas sp. CA23 OX=2033032 GN=CK910_21910 PE=3 SV=1	K03286					0.83	-0.268817	SP	FALSE	FALSE
11	4	A0A291TYE2|A0A291TYE2	7.29	75	55	55	1.61765	40.4617	1570000000	3240000000	755000000	1590000000	77506	Elongation factor G OS=Aeromonas sp. CA23 OX=2033032 GN=fusA PE=3 SV=1	K02355					2.11	1.07724	NO_SP	FALSE	FALSE
13	14	A0A291TVH4|A0A291TVH4	2.9	84	43	43	1.95455	89.0628	2170000000	1580000000	748000000	649000000	57354	Chaperonin GroEL OS=Aeromonas sp. CA23 OX=2033032 GN=groL PE=3 SV=1	K04077					0.87	-0.200913	NO_SP	FALSE	FALSE
14	20	A0A291U618|A0A291U618	6.86	72	53	53	1.35897	21.8546	1080000000	779000000	465000000	325000000	89730	Outer membrane protein assembly factor BamA OS=Aeromonas sp. CA23 OX=2033032 GN=bamA PE=3 SV=1	K07277					0.7	-0.514573	SP	FALSE	FALSE
17	8	A0A291TXG7|A0A291TXG7	14.06	80	48	48	1.54839	34.3498	3420000000	1600000000	1050000000	512000000	67076	Vitamin B12 transporter BtuB OS=Aeromonas sp. CA23 OX=2033032 GN=btuB PE=3 SV=1	K16092					0.49	-1.02915	SP	FALSE	FALSE
18	35	A0A291U683|A0A291U683	13.43	76	34	34	1.25926	17.166	996000000	428000000	468000000	214000000	62688	NAD-dependent malic enzyme OS=Aeromonas sp. CA23 OX=2033032 GN=maeA PE=3 SV=1	K00027					0.46	-1.12029	NO_SP	FALSE	FALSE
20	50	A0A291TZD4|A0A291TZD4	8.87	70	32	32	1.23077	16.0125	2230000000	1560000000	956000000	740000000	48916	Outer membrane channel protein TolC OS=Aeromonas sp. CA23 OX=2033032 GN=CK910_07940 PE=3 SV=1	K12340					0.77	-0.37707	SP	FALSE	FALSE
21	26	A0A291U0X4|A0A291U0X4	7.67	75	38	38	1.22581	15.8192	1440000000	420000000	829000000	267000000	63695	Phosphoenolpyruvate-protein phosphotransferase OS=Aeromonas sp. CA23 OX=2033032 GN=CK910_11825 PE=3 SV=1	K08483					0.32	-1.64386	NO_SP	FALSE	FALSE
22	34	A0A291TYF4|A0A291TYF4	1.38	74	42	42	2.33333	214.443	987000000	1020000000	420000000	437000000	47918	Periplasmic serine endoprotease DegP-like OS=Aeromonas sp. CA23 OX=2033032 GN=CK910_07165 PE=3 SV=1	K04772					1.04	0.0565835	SP	FALSE	FALSE
23	44	A0A291U802|A0A291U802	6.1	61	45	45	1.32353	20.0634	1080000000	527000000	489000000	227000000	69942	Peptidylprolyl isomerase OS=Aeromonas sp. CA23 OX=2033032 GN=CK910_17900 PE=4 SV=1	K03770					0.47	-1.08927	NO_SP	FALSE	FALSE
24	107	A0A291U1U9|A0A291U1U9	2	61	34	34	2.26667	183.785	13700000000	12200000000	11000000000	9490000000	38248	Porin OS=Aeromonas sp. CA23 OX=2033032 GN=CK910_13005 PE=4 SV=1	K09476					0.86	-0.217591	SP	FALSE	FALSE
25	81	A0A291U5R8|A0A291U5R8	18.13	72	28	26	1.86667	72.5642	13000000000	3360000000	8100000000	2090000000	35840	Porin OmpA OS=Aeromonas sp. CA23 OX=2033032 GN=CK910_21905 PE=3 SV=1	K03286					0.26	-1.94342	SP	FALSE	FALSE
26	41	A0A291U1X8|A0A291U1X8	1.51	76	33	33	1.22222	15.681	1860000000	1490000000	603000000	524000000	49072	Channel protein TolC OS=Aeromonas sp. CA23 OX=2033032 GN=CK910_13715 PE=3 SV=1	K12543					0.87	-0.200913	SP	FALSE	FALSE
27	29	A0A291U4S1|A0A291U4S1	4.23	72	41	41	1.70833	50.0897	2560000000	1810000000	1480000000	1050000000	61341	30S ribosomal protein S1 OS=Aeromonas sp. CA23 OX=2033032 GN=CK910_18810 PE=3 SV=1	K02945					0.71	-0.494109	NO_SP	FALSE	FALSE
28	65	A0A291TZA5|A0A291TZA5	0.12	64	25	25	1.38889	23.4844	561000000	501000000	335000000	326000000	68809	LppC family lipoprotein OS=Aeromonas sp. CA23 OX=2033032 GN=CK910_07230 PE=4 SV=1	K07121					0.97	-0.0439433	LIPO	FALSE	FALSE
29	19	A0A291U3B8|A0A291U3B8	0.82	62	41	41	1.24242	16.4753	1620000000	1100000000	781000000	566000000	74030	PrkA family serine protein kinase OS=Aeromonas sp. CA23 OX=2033032 GN=CK910_15860 PE=4 SV=1	K07180					0.73	-0.454032	NO_SP	FALSE	FALSE
30	27	A0A291TX90|A0A291TX90	24	74	27	27	1.35	21.3872	4110000000	790000000	1440000000	312000000	51786	Glutamine synthetase OS=Aeromonas sp. CA23 OX=2033032 GN=glnA PE=3 SV=1	K01915					0.22	-2.18442	NO_SP	FALSE	CORRECT
31	22	A0A291U405|A0A291U405	0.55	74	43	43	1.19444	14.6475	1400000000	845000000	572000000	366000000	71732	Chaperone protein HtpG OS=Aeromonas sp. CA23 OX=2033032 GN=htpG PE=3 SV=1	K04079					0.64	-0.643856	NO_SP	FALSE	FALSE
32	16	A0A291U1Y9|A0A291U1Y9	8.26	59	41	41	1.10811	11.8265	630000000	169000000	290000000	86100000	96480	Aldehyde-alcohol dehydrogenase OS=Aeromonas sp. CA23 OX=2033032 GN=CK910_14640 PE=3 SV=1	K04072					0.3	-1.73697	NO_SP	FALSE	FALSE
33	9	A0A291U0Y3|A0A291U0Y3	16.79	67	34	34	1.36	21.9087	2010000000	381000000	751000000	172000000	62992	NAD-dependent malic enzyme OS=Aeromonas sp. CA23 OX=2033032 GN=CK910_11735 PE=3 SV=1	K00027					0.23	-2.12029	NO_SP	FALSE	FALSE
34	87	A0A291U605|A0A291U605	0.07	77	28	28	1.47368	28.7635	1800000000	1740000000	792000000	719000000	31190	Elongation factor Ts OS=Aeromonas sp. CA23 OX=2033032 GN=tsf PE=3 SV=1	K02357					0.91	-0.136062	NO_SP	FALSE	FALSE
36	28	A0A291TWU8|A0A291TWU8	8.37	63	29	29	1.16	13.4544	1750000000	192000000	970000000	114000000	62436	2 3-bisphosphoglycerate-independent phosphoglycerate mutase OS=Aeromonas sp. CA23 OX=2033032 GN=gpmI PE=3 SV=1	K15633					0.12	-3.05889	NO_SP	FALSE	FALSE
37	68	A0A291U526|A0A291U526	8.7	70	25	25	1.19048	14.5052	579000000	1360000000	188000000	452000000	42197	Maltodextrin-binding protein OS=Aeromonas sp. CA23 OX=2033032 GN=CK910_19600 PE=3 SV=1	K10108					2.4	1.26303	SP	FALSE	FALSE
38	36	A0A291U3S4|A0A291U3S4	17.98	66	33	32	1.32	19.893	1740000000	175000000	577000000	61900000	47807	Trigger factor OS=Aeromonas sp. CA23 OX=2033032 GN=tig PE=3 SV=1	K03545					0.11	-3.18442	NO_SP	FALSE	FALSE
40	120	A0A291U409|A0A291U409	24.12	64	31	31	1.63158	41.8133	1370000000	4680000000	656000000	2140000000	47091	Long-chain fatty acid transporter OS=Aeromonas sp. CA23 OX=2033032 GN=CK910_17310 PE=3 SV=1	K06076					3.27	1.70929	SP	FALSE	CORRECT
42	2438	A0A291U0Y6|A0A291U0Y6	29.65	70	29	29	1.16	13.4544	23600000	1680000000	7400000	945000000	62806	Peptide ABC transporter substrate-binding protein OS=Aeromonas sp. CA23 OX=2033032 GN=CK910_11590 PE=3 SV=1	K02035					64	6	SP	FALSE	CORRECT
43	92	A0A291TVK1|A0A291TVK1	14.66	88	32	32	2.90909	810.131	14500000000	5290000000	6060000000	2330000000	28566	Lipoprotein OS=Aeromonas sp. CA23 OX=2033032 GN=metQ PE=3 SV=1	K02073					0.38	-1.39593	LIPO	FALSE	FALSE
44	134	A0A291TXS9|A0A291TXS9	19	75	22	22	1.69231	48.2388	1350000000	9240000000	839000000	5240000000	40026	Putrescine-binding periplasmic protein OS=Aeromonas sp. CA23 OX=2033032 GN=CK910_05865 PE=3 SV=1	K11073					6.24	2.64155	SP	FALSE	FALSE
45	72	A0A291U4S3|A0A291U4S3	2.06	58	30	30	1	9	543000000	586000000	210000000	227000000	71634	TonB-dependent receptor OS=Aeromonas sp. CA23 OX=2033032 GN=CK910_18125 PE=3 SV=1	K16089					1.08	0.111031	SP	FALSE	FALSE
48	84	A0A291U3R4|A0A291U3R4	14.83	60	23	23	1.21053	15.2378	656000000	417000000	283000000	166000000	58960	GlyGly-CTERM sorting domain-containing protein OS=Aeromonas sp. CA23 OX=2033032 GN=CK910_16640 PE=4 SV=1						0.59	-0.761213	SP	FALSE	FALSE
49	49	A0A291TZB6|A0A291TZB6	7	38	34	34	0.708333	4.10897	401000000	210000000	196000000	115000000	107378	Valine--tRNA ligase OS=Aeromonas sp. CA23 OX=2033032 GN=valS PE=3 SV=1	K01873					0.59	-0.761213	NO_SP	FALSE	FALSE
53	76	A0A291U0I5|A0A291U0I5	15.62	70	27	27	1.42105	25.3665	1190000000	490000000	492000000	215000000	43479	Serine-type D-Ala-D-Ala carboxypeptidase OS=Aeromonas sp. CA23 OX=2033032 GN=CK910_10745 PE=3 SV=1	K07258					0.44	-1.18442	SP	FALSE	FALSE
57	100	A0A291U6T2|A0A291U6T2	21.22	88	33	33	1.73684	53.5559	392000000	5420000000	155000000	2120000000	38161	Leucine ABC transporter subunit substrate-binding protein LivK OS=Aeromonas sp. CA23 OX=2033032 GN=CK910_05095 PE=3 SV=1	K01999					13.66	3.77189	SP	FALSE	FALSE
58	212	A0A291U1U5|A0A291U1U5	6.96	70	21	21	1.75	55.2341	1150000000	1690000000	661000000	1060000000	31621	Amino acid ABC transporter substrate-binding protein OS=Aeromonas sp. CA23 OX=2033032 GN=CK910_12930 PE=3 SV=1	K02030					1.61	0.687061	SP	FALSE	FALSE
59	157	A0A291U597|A0A291U597	11.84	57	34	34	1.17241	13.8735	443000000	810000000	177000000	291000000	68422	Hemolysin OS=Aeromonas sp. CA23 OX=2033032 GN=CK910_20415 PE=4 SV=1	K10948					1.64	0.713696	SP	FALSE	FALSE
60	1779	A0A291TVA9|A0A291TVA9	41.14	34	27	27	0.84375	5.97831	18200000	278000000	8410000	137000000	92524	Glycoside hydrolase OS=Aeromonas sp. CA23 OX=2033032 GN=CK910_00080 PE=3 SV=1	K01183				GH18.hmm	16.33	4.02945	SP	CORRECT	CORRECT
60	1779	A0A291TVA9|A0A291TVA9	41.14	34	27	27	0.84375	5.97831	18200000	278000000	8410000	137000000	92524	Glycoside hydrolase OS=Aeromonas sp. CA23 OX=2033032 GN=CK910_00080 PE=3 SV=1	K01183				CBM5.hmm	16.33	4.02945	SP	CORRECT	CORRECT
60	1779	A0A291TVA9|A0A291TVA9	41.14	34	27	27	0.84375	5.97831	18200000	278000000	8410000	137000000	92524	Glycoside hydrolase OS=Aeromonas sp. CA23 OX=2033032 GN=CK910_00080 PE=3 SV=1	K01183				CBM5.hmm	16.33	4.02945	SP	CORRECT	CORRECT
60	1779	A0A291TVA9|A0A291TVA9	41.14	34	27	27	0.84375	5.97831	18200000	278000000	8410000	137000000	92524	Glycoside hydrolase OS=Aeromonas sp. CA23 OX=2033032 GN=CK910_00080 PE=3 SV=1	K01183				CBM5.hmm	16.33	4.02945	SP	CORRECT	CORRECT
60	1779	A0A291TVA9|A0A291TVA9	41.14	34	27	27	0.84375	5.97831	18200000	278000000	8410000	137000000	92524	Glycoside hydrolase OS=Aeromonas sp. CA23 OX=2033032 GN=CK910_00080 PE=3 SV=1	K01183				CBM12.hmm	16.33	4.02945	SP	CORRECT	CORRECT
60	1779	A0A291TVA9|A0A291TVA9	41.14	34	27	27	0.84375	5.97831	18200000	278000000	8410000	137000000	92524	Glycoside hydrolase OS=Aeromonas sp. CA23 OX=2033032 GN=CK910_00080 PE=3 SV=1	K01183				CBM12.hmm	16.33	4.02945	SP	CORRECT	CORRECT
60	1779	A0A291TVA9|A0A291TVA9	41.14	34	27	27	0.84375	5.97831	18200000	278000000	8410000	137000000	92524	Glycoside hydrolase OS=Aeromonas sp. CA23 OX=2033032 GN=CK910_00080 PE=3 SV=1	K01183				CBM12.hmm	16.33	4.02945	SP	CORRECT	CORRECT
60	1779	A0A291TVA9|A0A291TVA9	41.14	34	27	27	0.84375	5.97831	18200000	278000000	8410000	137000000	92524	Glycoside hydrolase OS=Aeromonas sp. CA23 OX=2033032 GN=CK910_00080 PE=3 SV=1	K01183				CBM44.hmm	16.33	4.02945	SP	CORRECT	CORRECT
60	1779	A0A291TVA9|A0A291TVA9	41.14	34	27	27	0.84375	5.97831	18200000	278000000	8410000	137000000	92524	Glycoside hydrolase OS=Aeromonas sp. CA23 OX=2033032 GN=CK910_00080 PE=3 SV=1	K01183				CBM44.hmm	16.33	4.02945	SP	CORRECT	CORRECT
60	1779	A0A291TVA9|A0A291TVA9	41.14	34	27	27	0.84375	5.97831	18200000	278000000	8410000	137000000	92524	Glycoside hydrolase OS=Aeromonas sp. CA23 OX=2033032 GN=CK910_00080 PE=3 SV=1	K01183				CBM44.hmm	16.33	4.02945	SP	CORRECT	CORRECT
61	110	A0A291U6Q4|A0A291U6Q4	0.18	68	31	31	1.29167	18.5734	853000000	755000000	425000000	387000000	48563	Na(+)-translocating NADH-quinone reductase subunit A OS=Aeromonas sp. CA23 OX=2033032 GN=nqrA PE=3 SV=1	K00346					0.91	-0.136062	NO_SP	FALSE	FALSE
62	10	A0A291TYN0|A0A291TYN0	1.08	81	35	35	1.52174	32.246	14100000000	10000000000	8910000000	6600000000	43300	Elongation factor Tu OS=Aeromonas sp. CA23 OX=2033032 GN=tuf PE=3 SV=1	K02358					0.74	-0.434403	NO_SP	FALSE	FALSE
64	7	A0A291U572|A0A291U572	8.82	84	35	35	1.2963	18.7832	1150000000	186000000	586000000	106000000	55493	Glycerol kinase OS=Aeromonas sp. CA23 OX=2033032 GN=glpK PE=3 SV=1	K00864					0.18	-2.47393	NO_SP	FALSE	FALSE
65	150	A0A291U1U3|A0A291U1U3	0.54	36	36	36	0.486486	2.0654	334000000	289000000	143000000	158000000	162494	Glutamate synthase large subunit OS=Aeromonas sp. CA23 OX=2033032 GN=CK910_13695 PE=3 SV=1	K00265					1.1	0.137504	NO_SP	FALSE	FALSE
67	174	A0A291U6S7|A0A291U6S7	25.37	87	24	24	1.84615	69.1704	1940000000	1110000000	1260000000	736000000	28597	Peptidyl-prolyl cis-trans isomerase OS=Aeromonas sp. CA23 OX=2033032 GN=CK910_23515 PE=3 SV=1	K03772					0.58	-0.785875	LIPO	FALSE	CORRECT
69	135	A0A291TW30|A0A291TW30	15.05	42	26	26	0.530612	2.39322	229000000	147000000	131000000	87800000	102952	Peptidase M16 OS=Aeromonas sp. CA23 OX=2033032 GN=CK910_01425 PE=3 SV=1	K07263					0.67	-0.577767	SP	FALSE	FALSE
71	55	A0A291U067|A0A291U067	10.78	40	28	28	1.03704	9.89023	463000000	201000000	239000000	91500000	76466	Polyribonucleotide nucleotidyltransferase OS=Aeromonas sp. CA23 OX=2033032 GN=pnp PE=3 SV=1	K00962					0.38	-1.39593	NO_SP	FALSE	FALSE
72	138	A0A291U720|A0A291U720	12.3	51	28	28	1.33333	20.5443	449000000	1030000000	165000000	370000000	66427	Bifunctional metallophosphatase/5'-nucleotidase OS=Aeromonas sp. CA23 OX=2033032 GN=CK910_23485 PE=3 SV=1	K11751					2.24	1.1635	LIPO	FALSE	FALSE
75	187	A0A291TYL4|A0A291TYL4	16.75	72	20	20	1.53846	33.5511	1600000000	627000000	1080000000	414000000	24618	50S ribosomal protein L1 OS=Aeromonas sp. CA23 OX=2033032 GN=rplA PE=3 SV=1	K02863					0.38	-1.39593	NO_SP	FALSE	FALSE
76	149	A0A291TY30|A0A291TY30	1.87	13	18	18	0.26087	0.823348	49200000	43500000	28100000	22600000	158300	DNA-directed RNA polymerase subunit beta' OS=Aeromonas sp. CA23 OX=2033032 GN=rpoC PE=3 SV=1	K03046					0.81	-0.304006	NO_SP	FALSE	FALSE
77	74	A0A291TXN9|A0A291TXN9	10.55	57	20	20	1.11111	11.9155	336000000	596000000	208000000	354000000	53566	Aldehyde dehydrogenase PuuC OS=Aeromonas sp. CA23 OX=2033032 GN=CK910_03850 PE=3 SV=1	K12254					1.7	0.765535	NO_SP	FALSE	FALSE
78	112	A0A291TXP6|A0A291TXP6	13.23	63	26	26	1.52941	32.8386	1150000000	430000000	488000000	197000000	48699	Glutathione-disulfide reductase OS=Aeromonas sp. CA23 OX=2033032 GN=CK910_04575 PE=3 SV=1	K00383					0.4	-1.32193	NO_SP	FALSE	FALSE
82	145	A0A291U520|A0A291U520	9.71	81	15	15	1.66667	45.4159	726000000	288000000	385000000	161000000	24882	Glutathione S-transferase OS=Aeromonas sp. CA23 OX=2033032 GN=CK910_19270 PE=3 SV=1	K11209					0.42	-1.25154	NO_SP	FALSE	FALSE
83	2470	A0A291U719|A0A291U719	37.42	68	29	29	1.61111	39.8424	70300000	7890000000	32900000	4640000000	52764	Outer membrane porin OprD family OS=Aeromonas sp. CA23 OX=2033032 GN=CK910_23275 PE=3 SV=1						64	6	SP	CORRECT	CORRECT
84	181	A0A291U511|A0A291U511	12.5	99	25	25	2.5	315.228	7060000000	2940000000	3000000000	1120000000	20631	Alkyl hydroperoxide reductase C OS=Aeromonas sp. CA23 OX=2033032 GN=CK910_19205 PE=3 SV=1	K24119					0.37	-1.4344	NO_SP	FALSE	FALSE
85	125	A0A291U5K7|A0A291U5K7	6.89	100	25	25	2.27273	186.382	2000000000	3160000000	995000000	1540000000	21988	Alkyl hydroperoxide reductase C OS=Aeromonas sp. CA23 OX=2033032 GN=CK910_20405 PE=3 SV=1	K03386					1.55	0.632268	NO_SP	FALSE	FALSE
86	67	A0A291U3N3|A0A291U3N3	10.29	42	28	28	0.8	5.30957	286000000	153000000	93700000	51600000	74870	Carboxy terminal-processing peptidase OS=Aeromonas sp. CA23 OX=2033032 GN=CK910_16590 PE=3 SV=1	K03797					0.55	-0.862496	SP	FALSE	FALSE
89	260	A0A291TWK3|A0A291TWK3	1.08	44	27	27	0.9	6.94328	343000000	259000000	191000000	135000000	73140	Bifunctional 2' 3'-cyclic-nucleotide 2'-phosphodiesterase/3'-nucleotidase OS=Aeromonas sp. CA23 OX=2033032 GN=CK910_02230 PE=3 SV=1	K01119					0.71	-0.494109	LIPO	FALSE	FALSE
90	21	A0A291TV70|A0A291TV70	1.4	49	27	27	0.9	6.94328	322000000	113000000	163000000	63300000	77660	Phosphate acetyltransferase OS=Aeromonas sp. CA23 OX=2033032 GN=CK910_00525 PE=3 SV=1	K13788					0.39	-1.35845	NO_SP	FALSE	FALSE
94	66	A0A291U030|A0A291U030	29.08	72	25	25	1.25	16.7828	816000000	27500000	462000000	16000000	52263	Cytosol nonspecific dipeptidase OS=Aeromonas sp. CA23 OX=2033032 GN=CK910_09910 PE=4 SV=1	K01270					0.03	-5.05889	NO_SP	FALSE	CORRECT
95	156	A0A291TX58|A0A291TX58	10.45	69	25	25	1.38889	23.4844	159000000	618000000	62300000	232000000	39268	BMP family ABC transporter substrate-binding protein OS=Aeromonas sp. CA23 OX=2033032 GN=CK910_03940 PE=3 SV=1	K07335					3.73	1.89918	NO_SP	FALSE	FALSE
98	160	A0A291U085|A0A291U085	4.83	28	16	14	0.592593	2.91375	224000000	193000000	166000000	133000000	75197	Methyl-accepting chemotaxis protein OS=Aeromonas sp. CA23 OX=2033032 GN=CK910_09795 PE=4 SV=1	K03406					0.8	-0.321928	NO_SP	FALSE	FALSE
99	86	A0A291TVZ4|A0A291TVZ4	10.87	54	29	29	0.828571	5.73863	442000000	176000000	147000000	71100000	79042	S9 family peptidase OS=Aeromonas sp. CA23 OX=2033032 GN=CK910_01155 PE=3 SV=1	K01322				CE10.hmm	0.48	-1.05889	LIPO	FALSE	FALSE
99	86	A0A291TVZ4|A0A291TVZ4	10.87	54	29	29	0.828571	5.73863	442000000	176000000	147000000	71100000	79042	S9 family peptidase OS=Aeromonas sp. CA23 OX=2033032 GN=CK910_01155 PE=3 SV=1	K01322				CE7.hmm	0.48	-1.05889	LIPO	FALSE	FALSE
100	349	A0A291TZD7|A0A291TZD7	3.43	64	27	27	1	9	210000000	191000000	75500000	76100000	59507	Oligopeptide ABC transporter substrate-binding protein OppA OS=Aeromonas sp. CA23 OX=2033032 GN=CK910_08780 PE=4 SV=1	K15580					1.01	0.0143553	SP	FALSE	FALSE
102	83	A0A291U068|A0A291U068	1.98	33	20	20	0.714286	4.17947	173000000	120000000	125000000	90300000	71647	ATP-dependent zinc metalloprotease FtsH OS=Aeromonas sp. CA23 OX=2033032 GN=ftsH PE=3 SV=1	K03798					0.72	-0.473931	NO_SP	FALSE	FALSE
108	89	A0A291U4A2|A0A291U4A2	2.84	56	26	26	0.866667	6.35642	392000000	269000000	147000000	113000000	68919	NADH-quinone oxidoreductase subunit C/D OS=Aeromonas sp. CA23 OX=2033032 GN=nuoC PE=3 SV=1	K13378					0.76	-0.395929	NO_SP	FALSE	FALSE
109	60	A0A291U3K4|A0A291U3K4	20.11	69	23	23	1.09524	11.452	323000000	171000000	166000000	77700000	37293	Phenylalanine--tRNA ligase alpha subunit OS=Aeromonas sp. CA23 OX=2033032 GN=pheS PE=3 SV=1	K01889					0.47	-1.08927	NO_SP	FALSE	FALSE
115	114	A0A291TW19|A0A291TW19	5.33	64	23	23	1.35294	21.5393	544000000	339000000	349000000	220000000	30700	Glutamine ABC transporter substrate-binding protein OS=Aeromonas sp. CA23 OX=2033032 GN=CK910_01180 PE=4 SV=1	K02030					0.63	-0.666576	SP	FALSE	FALSE
116	173	A0A291TW93|A0A291TW93	2.91	60	18	18	0.857143	6.19686	196000000	334000000	157000000	257000000	36368	Sulfate transporter subunit OS=Aeromonas sp. CA23 OX=2033032 GN=CK910_01995 PE=3 SV=1	K23163					1.64	0.713696	SP	FALSE	FALSE
117	116	A0A291TY35|A0A291TY35	0.85	43	18	18	1.125	12.3352	267000000	252000000	154000000	129000000	53202	NAD(P) transhydrogenase subunit alpha OS=Aeromonas sp. CA23 OX=2033032 GN=CK910_06160 PE=3 SV=1	K00324					0.84	-0.251539	NO_SP	FALSE	FALSE
118	132	A0A291U5E6|A0A291U5E6	6.96	41	28	28	0.875	6.49894	404000000	99400000	180000000	39300000	63313	Glutamine--tRNA ligase OS=Aeromonas sp. CA23 OX=2033032 GN=glnS PE=3 SV=1	K01886					0.22	-2.18442	NO_SP	FALSE	FALSE
120	175	A0A291TZZ0|A0A291TZZ0	20.95	54	23	23	2.09091	122.285	978000000	279000000	551000000	165000000	38064	Zn-dependent exopeptidase M28 OS=Aeromonas sp. CA23 OX=2033032 GN=CK910_09630 PE=4 SV=1						0.3	-1.73697	LIPO	FALSE	FALSE
122	698	A0A291U670|A0A291U670	14.68	43	13	13	1	9	389000000	219000000	209000000	122000000	31516	Thioredoxin OS=Aeromonas sp. CA23 OX=2033032 GN=CK910_21685 PE=4 SV=1	K05838				GT41.hmm	0.58	-0.785875	NO_SP	FALSE	FALSE
123	317	A0A291U669|A0A291U669	9.02	54	20	20	2	99	3790000000	4650000000	2590000000	3290000000	32063	Uncharacterized protein OS=Aeromonas sp. CA23 OX=2033032 GN=CK910_22675 PE=3 SV=1	K05517					1.27	0.344828	SP	FALSE	FALSE
127	104	A0A291U0J5|A0A291U0J5	2.78	28	22	22	0.611111	3.08424	199000000	151000000	103000000	77100000	96521	Leucine--tRNA ligase OS=Aeromonas sp. CA23 OX=2033032 GN=leuS PE=3 SV=1	K01869					0.75	-0.415037	NO_SP	FALSE	FALSE
128	214	A0A291TVE1|A0A291TVE1	8.84	63	17	17	1.13333	12.5936	418000000	300000000	259000000	184000000	41561	Outer membrane protein assembly factor BamC OS=Aeromonas sp. CA23 OX=2033032 GN=bamC PE=3 SV=1	K07287					0.71	-0.494109	LIPO	FALSE	FALSE
129	427	A0A291TVS1|A0A291TVS1	12.01	77	12	12	1.71429	50.7947	2990000000	1550000000	1910000000	1020000000	15077	30S ribosomal protein S6 OS=Aeromonas sp. CA23 OX=2033032 GN=rpsF PE=3 SV=1	K02990					0.53	-0.915936	NO_SP	FALSE	FALSE
130	343	A0A291U7C7|A0A291U7C7	19.51	94	19	19	1.9	78.4328	1610000000	2750000000	1130000000	2170000000	17569	DNA starvation/stationary phase protection protein OS=Aeromonas sp. CA23 OX=2033032 GN=CK910_23115 PE=3 SV=1	K04047					1.92	0.941106	NO_SP	FALSE	FALSE
131	97	A0A291U0S6|A0A291U0S6	15.11	31	20	17	0.740741	4.50479	417000000	208000000	289000000	134000000	66514	Chemotaxis protein OS=Aeromonas sp. CA23 OX=2033032 GN=CK910_10215 PE=4 SV=1	K03406					0.47	-1.08927	NO_SP	FALSE	FALSE
133	215	A0A291TYS4|A0A291TYS4	14.28	37	21	18	0.913043	7.18547	183000000	71800000	112000000	40900000	67564	Methyl-accepting chemotaxis protein OS=Aeromonas sp. CA23 OX=2033032 GN=CK910_06140 PE=4 SV=1	K03406					0.37	-1.4344	NO_SP	FALSE	FALSE
135	182	A0A291U508|A0A291U508	10.43	63	18	9	0.947368	7.85867	1630000000	393000000	1230000000	285000000	31900	Flagellin OS=Aeromonas sp. CA23 OX=2033032 GN=CK910_19345 PE=3 SV=1	K02406					0.23	-2.12029	NO_SP	FALSE	FALSE
138	559	A0A291U4J6|A0A291U4J6	5.47	7	9	9	0.1125	0.295687	29100000	21100000	23900000	17500000	182174	Alpha-2-macroglobulin OS=Aeromonas sp. CA23 OX=2033032 GN=CK910_19380 PE=3 SV=1	K06894					0.73	-0.454032	NO_SP	FALSE	FALSE
139	61	A0A291U202|A0A291U202	10.6	65	26	26	1.13043	12.5031	360000000	120000000	185000000	62400000	51794	Glutamate synthase small subunit OS=Aeromonas sp. CA23 OX=2033032 GN=CK910_13690 PE=4 SV=1	K00266					0.34	-1.55639	NO_SP	FALSE	FALSE
140	268	A0A291U5E4|A0A291U5E4	10.7	70	16	7	1.14286	12.895	476000000	99900000	444000000	88800000	31981	Flagellin OS=Aeromonas sp. CA23 OX=2033032 GN=CK910_19350 PE=3 SV=1	K02406					0.2	-2.32193	NO_SP	FALSE	FALSE
144	244	A0A291U5U0|A0A291U5U0	14.29	58	25	25	1.19048	14.5052	88900000	307000000	46100000	138000000	36397	Amino acid ABC transporter substrate-binding protein OS=Aeromonas sp. CA23 OX=2033032 GN=CK910_22010 PE=3 SV=1	K09969					2.99	1.58015	SP	FALSE	FALSE
145	189	A0A291TZI9|A0A291TZI9	10.97	31	22	22	0.488889	2.0824	119000000	43300000	54300000	19700000	96025	Alanine--tRNA ligase OS=Aeromonas sp. CA23 OX=2033032 GN=alaS PE=3 SV=1	K01872					0.36	-1.47393	NO_SP	FALSE	FALSE
147	152	A0A291U3E3|A0A291U3E3	1.08	49	19	19	0.730769	4.37984	196000000	162000000	121000000	97000000	53001	2-methylcitrate dehydratase OS=Aeromonas sp. CA23 OX=2033032 GN=prpD PE=3 SV=1	K01720					0.8	-0.321928	NO_SP	FALSE	FALSE
148	101	A0A291U056|A0A291U056	2.51	51	22	22	1.1	11.5893	538000000	620000000	347000000	395000000	48193	Tol-Pal system protein TolB OS=Aeromonas sp. CA23 OX=2033032 GN=tolB PE=3 SV=1	K03641				PL22.hmm	1.14	0.189034	SP	FALSE	FALSE
148	101	A0A291U056|A0A291U056	2.51	51	22	22	1.1	11.5893	538000000	620000000	347000000	395000000	48193	Tol-Pal system protein TolB OS=Aeromonas sp. CA23 OX=2033032 GN=tolB PE=3 SV=1	K03641				PL22.hmm	1.14	0.189034	SP	FALSE	FALSE
148	101	A0A291U056|A0A291U056	2.51	51	22	22	1.1	11.5893	538000000	620000000	347000000	395000000	48193	Tol-Pal system protein TolB OS=Aeromonas sp. CA23 OX=2033032 GN=tolB PE=3 SV=1	K03641				PL22.hmm	1.14	0.189034	SP	FALSE	FALSE
149	243	A0A291TYM6|A0A291TYM6	9.17	72	17	17	1	9	272000000	134000000	115000000	58000000	43126	Spermidine/putrescine import ATP-binding protein PotA OS=Aeromonas sp. CA23 OX=2033032 GN=potA PE=3 SV=1	K11076					0.5	-1	NO_SP	FALSE	FALSE
150	43	A0A291TXF4|A0A291TXF4	16.4	57	23	23	1.04545	10.1034	277000000	5040000	164000000	2190000	49016	6-phospho-alpha-glucosidase OS=Aeromonas sp. CA23 OX=2033032 GN=CK910_05105 PE=3 SV=1	K01232				GH4.hmm	0.02	-5.64386	NO_SP	FALSE	FALSE
150	43	A0A291TXF4|A0A291TXF4	16.4	57	23	23	1.04545	10.1034	277000000	5040000	164000000	2190000	49016	6-phospho-alpha-glucosidase OS=Aeromonas sp. CA23 OX=2033032 GN=CK910_05105 PE=3 SV=1	K01232				GH4.hmm	0.02	-5.64386	NO_SP	FALSE	FALSE
151	77	A0A291TWY7|A0A291TWY7	6.6	83	26	26	1.52941	32.8386	3890000000	3180000000	2740000000	2160000000	36195	DNA-directed RNA polymerase subunit alpha OS=Aeromonas sp. CA23 OX=2033032 GN=rpoA PE=3 SV=1	K03040					0.79	-0.340075	NO_SP	FALSE	FALSE
153	185	A0A291TZZ2|A0A291TZZ2	6.9	40	26	26	1.3	18.9526	311000000	208000000	192000000	129000000	55357	Transcription termination/antitermination protein NusA OS=Aeromonas sp. CA23 OX=2033032 GN=nusA PE=3 SV=1	K02600					0.67	-0.577767	NO_SP	FALSE	FALSE
154	237	A0A291U3T4|A0A291U3T4	11.7	49	24	24	0.8	5.30957	90700000	382000000	36600000	161000000	59919	Oligopeptide ABC transporter substrate-binding protein OppA OS=Aeromonas sp. CA23 OX=2033032 GN=CK910_17975 PE=4 SV=1	K15580					4.41	2.14078	SP	FALSE	FALSE
156	281	A0A291U4V9|A0A291U4V9	2.25	47	19	19	1.26667	17.4785	195000000	172000000	95800000	89000000	42466	Outer membrane protein assembly factor BamB OS=Aeromonas sp. CA23 OX=2033032 GN=bamB PE=3 SV=1	K17713					0.93	-0.104697	LIPO	FALSE	FALSE
157	194	A0A291TY93|A0A291TY93	20.65	46	14	14	1.16667	13.678	1370000000	43500000	847000000	26300000	38044	Glycerol dehydrogenase OS=Aeromonas sp. CA23 OX=2033032 GN=gldA PE=3 SV=1	K00005					0.03	-5.05889	NO_SP	FALSE	FALSE
159	671	A0A291TYX4|A0A291TYX4	14.52	39	9	9	1.5	30.6228	17400000000	3940000000	11100000000	2450000000	21655	Outer membrane protein OmpW OS=Aeromonas sp. CA23 OX=2033032 GN=CK910_06940 PE=4 SV=1	K07275					0.22	-2.18442	SP	FALSE	FALSE
160	177	A0A291TYD1|A0A291TYD1	13.12	41	25	25	0.862069	6.27895	219000000	267000000	149000000	189000000	72094	Ligand-gated channel protein OS=Aeromonas sp. CA23 OX=2033032 GN=CK910_06760 PE=3 SV=1	K16089					1.27	0.344828	SP	FALSE	FALSE
162	166	A0A291TVH0|A0A291TVH0	2.25	37	22	22	0.709677	4.12481	275000000	228000000	125000000	105000000	93265	LPS-assembly protein LptD OS=Aeromonas sp. CA23 OX=2033032 GN=lptD PE=3 SV=1	K04744					0.84	-0.251539	SP	FALSE	FALSE
163	276	A0A291U5R4|A0A291U5R4	13.01	36	16	16	1.77778	58.9484	1340000000	290000000	965000000	219000000	49863	EIICB-Glc OS=Aeromonas sp. CA23 OX=2033032 GN=CK910_22470 PE=4 SV=1	K02779					0.23	-2.12029	NO_SP	FALSE	FALSE
166	52	A0A291U5P0|A0A291U5P0	3.23	61	26	26	1.13043	12.5031	382000000	317000000	160000000	164000000	52266	Asparagine--tRNA ligase OS=Aeromonas sp. CA23 OX=2033032 GN=asnS PE=3 SV=1	K01893					1.03	0.0426443	NO_SP	FALSE	FALSE
173	300	A0A291TV95|A0A291TV95	8.29	45	13	13	0.928571	7.48343	165000000	70300000	96200000	36700000	37878	D-methionine ABC transporter ATP-binding protein OS=Aeromonas sp. CA23 OX=2033032 GN=metN PE=4 SV=1	K02071					0.38	-1.39593	NO_SP	FALSE	FALSE
174	297	A0A291U530|A0A291U530	7.41	33	15	15	0.555556	2.59381	108000000	63600000	63600000	41200000	49046	Flagellar hook-associated protein 2 OS=Aeromonas sp. CA23 OX=2033032 GN=CK910_19335 PE=3 SV=1	K02407				CBM50.hmm	0.65	-0.621488	NO_SP	FALSE	FALSE
174	297	A0A291U530|A0A291U530	7.41	33	15	15	0.555556	2.59381	108000000	63600000	63600000	41200000	49046	Flagellar hook-associated protein 2 OS=Aeromonas sp. CA23 OX=2033032 GN=CK910_19335 PE=3 SV=1	K02407				CBM50.hmm	0.65	-0.621488	NO_SP	FALSE	FALSE
175	528	A0A291U5U8|A0A291U5U8	7.2	21	16	16	0.470588	1.95521	33600000	49100000	18100000	29600000	106117	Uncharacterized protein OS=Aeromonas sp. CA23 OX=2033032 GN=CK910_21010 PE=4 SV=1						1.63	0.704872	TAT	FALSE	FALSE
176	1040	A0A291TVL9|A0A291TVL9	4.72	16	8	8	0.285714	0.930698	73800000	48400000	62000000	38700000	76042	AsmA family protein OS=Aeromonas sp. CA23 OX=2033032 GN=CK910_01145 PE=4 SV=1	K07289					0.63	-0.666576	NO_SP	FALSE	FALSE
178	131	A0A291TY54|A0A291TY54	11.16	67	16	16	1.14286	12.895	485000000	148000000	294000000	97400000	36407	2-hydroxyacid dehydrogenase OS=Aeromonas sp. CA23 OX=2033032 GN=CK910_05830 PE=3 SV=1	K03778					0.33	-1.59946	NO_SP	FALSE	FALSE
180	115	A0A291TZT7|A0A291TZT7	5.37	45	23	23	0.92	7.31764	321000000	159000000	145000000	76600000	58284	Lysine--tRNA ligase OS=Aeromonas sp. CA23 OX=2033032 GN=lysS PE=3 SV=1	K04567					0.53	-0.915936	NO_SP	FALSE	FALSE
181	310	A0A291U6F2|A0A291U6F2	0.67	66	13	13	1.18182	14.1991	2580000000	2720000000	1790000000	1860000000	22538	Autotransporter OS=Aeromonas sp. CA23 OX=2033032 GN=CK910_23180 PE=4 SV=1						1.04	0.0565835	SP	FALSE	FALSE
182	489	A0A291U585|A0A291U585	22.44	54	18	18	1.05882	10.4505	24100000	409000000	14500000	222000000	40316	Glycerophosphodiester phosphodiesterase OS=Aeromonas sp. CA23 OX=2033032 GN=CK910_19670 PE=4 SV=1	K01126					15.34	3.93923	SP	FALSE	FALSE
183	148	A0A291U2F8|A0A291U2F8	4.54	46	11	11	0.55	2.54813	176000000	87300000	131000000	67600000	55284	Type VI secretion system contractile sheath large subunit OS=Aeromonas sp. CA23 OX=2033032 GN=CK910_15020 PE=4 SV=1	K11900					0.51	-0.971431	NO_SP	FALSE	FALSE
184	345	A0A291TVF3|A0A291TVF3	1.69	22	12	12	0.375	1.37137	211000000	199000000	141000000	148000000	76747	Ligand-gated channel protein OS=Aeromonas sp. CA23 OX=2033032 GN=CK910_00110 PE=3 SV=1	K16087					1.05	0.0703893	SP	FALSE	FALSE
185	389	A0A291U7Q8|A0A291U7Q8	12.92	26	16	16	0.64	3.36516	51700000	174000000	19100000	76800000	70060	ABC transporter substrate-binding protein OS=Aeromonas sp. CA23 OX=2033032 GN=CK910_12630 PE=4 SV=1	K13893					4.02	2.0072	SP	FALSE	FALSE
187	206	A0A291TZ33|A0A291TZ33	8.03	30	18	18	0.9	6.94328	182000000	548000000	76300000	231000000	54709	Probable cytosol aminopeptidase OS=Aeromonas sp. CA23 OX=2033032 GN=pepA PE=3 SV=1	K01255					3.04	1.60407	NO_SP	FALSE	FALSE
188	82	A0A291U6B4|A0A291U6B4	22.38	44	20	20	0.909091	7.11131	227000000	78300000	83400000	18500000	50204	AMP nucleosidase OS=Aeromonas sp. CA23 OX=2033032 GN=CK910_22545 PE=4 SV=1	K06966					0.22	-2.18442	NO_SP	FALSE	FALSE
189	170	A0A291TZ15|A0A291TZ15	13.61	61	20	20	1	9	245000000	76100000	163000000	50500000	40324	Cell division protein FtsZ OS=Aeromonas sp. CA23 OX=2033032 GN=ftsZ PE=3 SV=1	K03531					0.31	-1.68966	NO_SP	FALSE	FALSE
190	168	A0A291U034|A0A291U034	14.46	71	23	23	1.09524	11.452	171000000	89000000	106000000	54500000	40066	Riboflavin biosynthesis protein RibD OS=Aeromonas sp. CA23 OX=2033032 GN=ribD PE=3 SV=1	K11752					0.52	-0.943416	NO_SP	FALSE	FALSE
191	183	A0A291U0Z2|A0A291U0Z2	9.19	68	15	15	1.15385	13.251	464000000	292000000	387000000	232000000	37150	Tryptophan--tRNA ligase OS=Aeromonas sp. CA23 OX=2033032 GN=trpS PE=3 SV=1	K01867					0.6	-0.736966	NO_SP	FALSE	FALSE
192	137	A0A291TVY6|A0A291TVY6	16.7	66	16	16	0.941176	7.73326	764000000	455000000	376000000	237000000	36917	Uncharacterized protein OS=Aeromonas sp. CA23 OX=2033032 GN=CK910_00455 PE=4 SV=1						0.63	-0.666576	SP	FALSE	FALSE
196	192	A0A291U2Y4|A0A291U2Y4	5.18	43	13	13	0.52	2.31131	104000000	126000000	51000000	79200000	48248	Serine--tRNA ligase OS=Aeromonas sp. CA23 OX=2033032 GN=serS PE=3 SV=1	K01875					1.55	0.632268	NO_SP	FALSE	FALSE
197	494	A0A291U220|A0A291U220	1.77	31	17	17	0.653846	3.50657	93100000	73200000	49300000	37300000	74694	Uncharacterized protein OS=Aeromonas sp. CA23 OX=2033032 GN=CK910_13395 PE=4 SV=1						0.76	-0.395929	SP	FALSE	FALSE
198	118	A0A291U6N2|A0A291U6N2	2.05	50	17	17	0.894737	6.8476	452000000	292000000	167000000	129000000	44893	Na(+)-translocating NADH-quinone reductase subunit F OS=Aeromonas sp. CA23 OX=2033032 GN=nqrF PE=3 SV=1	K00351					0.77	-0.37707	NO_SP	FALSE	FALSE
199	249	A0A291TWK5|A0A291TWK5	1.57	69	15	15	1.15385	13.251	582000000	582000000	468000000	439000000	27027	Arginine ABC transporter substrate-binding protein OS=Aeromonas sp. CA23 OX=2033032 GN=CK910_01725 PE=4 SV=1	K09997					0.94	-0.0892673	SP	FALSE	FALSE
200	379	A0A291TVQ1|A0A291TVQ1	12.44	74	13	13	1.18182	14.1991	2170000000	835000000	1160000000	421000000	16656	Alkylhydroperoxidase OS=Aeromonas sp. CA23 OX=2033032 GN=CK910_01345 PE=4 SV=1						0.36	-1.47393	NO_SP	FALSE	FALSE
201	226	A0A291TXB1|A0A291TXB1	4.47	66	14	14	1.16667	13.678	365000000	439000000	234000000	286000000	22622	Cytochrome c4 OS=Aeromonas sp. CA23 OX=2033032 GN=CK910_03720 PE=4 SV=1						1.22	0.286881	SP	FALSE	FALSE
202	124	A0A291TYY3|A0A291TYY3	4.91	64	20	20	1.25	16.7828	288000000	164000000	163000000	83700000	37948	Dihydroxyacetone kinase subunit DhaK OS=Aeromonas sp. CA23 OX=2033032 GN=CK910_06510 PE=4 SV=1	K05878					0.51	-0.971431	NO_SP	FALSE	FALSE
205	338	A0A291U5A9|A0A291U5A9	8.34	95	11	11	2.2	157.489	1240000000	1930000000	667000000	1220000000	21584	Superoxide dismutase OS=Aeromonas sp. CA23 OX=2033032 GN=CK910_21055 PE=3 SV=1	K04564					1.83	0.871844	NO_SP	FALSE	FALSE
206	416	A0A291U2L2|A0A291U2L2	9.85	21	17	17	0.309091	1.03747	24100000	14100000	12400000	5340000	132196	Type VI secretion system membrane subunit TssM OS=Aeromonas sp. CA23 OX=2033032 GN=icmF PE=4 SV=1	K11891					0.43	-1.21759	NO_SP	FALSE	FALSE
209	199	A0A291U6H0|A0A291U6H0	9.71	66	16	16	1.6	38.8107	296000000	195000000	150000000	102000000	18897	Uncharacterized protein OS=Aeromonas sp. CA23 OX=2033032 GN=CK910_22400 PE=3 SV=1	K06142					0.68	-0.556393	SP	FALSE	FALSE
210	122	A0A291U341|A0A291U341	2.54	26	21	21	0.525	2.34965	85800000	95100000	44600000	50800000	102028	DNA gyrase subunit A OS=Aeromonas sp. CA23 OX=2033032 GN=gyrA PE=3 SV=1	K02469					1.14	0.189034	NO_SP	FALSE	FALSE
211	355	A0A291TVF7|A0A291TVF7	9.51	45	16	16	0.888889	6.74264	84800000	50300000	53800000	31800000	33251	Protein HflC OS=Aeromonas sp. CA23 OX=2033032 GN=CK910_00340 PE=3 SV=1	K04087					0.59	-0.761213	NO_SP	FALSE	FALSE
212	318	A0A291U1E1|A0A291U1E1	2.07	65	13	12	1.625	41.1697	724000000	651000000	581000000	525000000	15507	DNA-binding protein OS=Aeromonas sp. CA23 OX=2033032 GN=CK910_12075 PE=3 SV=1	K03746					0.9	-0.152003	NO_SP	FALSE	FALSE
213	353	A0A291TXX5|A0A291TXX5	8.45	30	10	10	0.555556	2.59381	39200000	83200000	27000000	53900000	47846	Cytosine deaminase OS=Aeromonas sp. CA23 OX=2033032 GN=CK910_04925 PE=4 SV=1	K01485				CE9.hmm	2	1	NO_SP	FALSE	FALSE
213	353	A0A291TXX5|A0A291TXX5	8.45	30	10	10	0.555556	2.59381	39200000	83200000	27000000	53900000	47846	Cytosine deaminase OS=Aeromonas sp. CA23 OX=2033032 GN=CK910_04925 PE=4 SV=1	K01485				CE9.hmm	2	1	NO_SP	FALSE	FALSE
214	238	A0A291U2U9|A0A291U2U9	26.25	44	12	12	1	9	663000000	13700000	473000000	8750000	45876	Type VI secretion system-associated FHA domain protein TagH OS=Aeromonas sp. CA23 OX=2033032 GN=CK910_15040 PE=4 SV=1	K11894					0.02	-5.64386	NO_SP	FALSE	CORRECT
215	217	A0A291TY87|A0A291TY87	12.62	33	15	15	0.6	2.98107	82100000	32200000	44500000	13900000	49897	ATP-dependent protease ATPase subunit HslU OS=Aeromonas sp. CA23 OX=2033032 GN=hslU PE=3 SV=1	K03667					0.31	-1.68966	NO_SP	FALSE	FALSE
216	223	A0A291U4B9|A0A291U4B9	10.43	67	20	20	1.42857	25.827	146000000	803000000	111000000	551000000	28518	ABC transporter substrate-binding protein OS=Aeromonas sp. CA23 OX=2033032 GN=CK910_19510 PE=3 SV=1	K10022					4.98	2.31615	SP	FALSE	FALSE
217	474	A0A291TZ48|A0A291TZ48	12.52	31	17	17	0.566667	2.68695	98500000	56100000	51900000	36700000	83130	Serine protease OS=Aeromonas sp. CA23 OX=2033032 GN=CK910_07430 PE=4 SV=1	K07001					0.71	-0.494109	SP	FALSE	FALSE
218	365	A0A291U0A3|A0A291U0A3	3.59	39	9	9	0.6	2.98107	145000000	198000000	119000000	162000000	33790	SPFH/Band 7/PHB domain protein OS=Aeromonas sp. CA23 OX=2033032 GN=CK910_09220 PE=4 SV=1						1.36	0.443607	NO_SP	FALSE	FALSE
219	221	A0A291U6J5|A0A291U6J5	2.53	43	20	20	0.714286	4.17947	85800000	79700000	43100000	47000000	76008	Peptidase M13 OS=Aeromonas sp. CA23 OX=2033032 GN=CK910_22305 PE=3 SV=1	K07386					1.09	0.124328	LIPO	FALSE	FALSE
221	202	A0A291U0V3|A0A291U0V3	17.7	33	16	16	0.888889	6.74264	234000000	90600000	109000000	44400000	43176	Efflux transporter periplasmic adaptor subunit OS=Aeromonas sp. CA23 OX=2033032 GN=CK910_12250 PE=3 SV=1	K03585					0.41	-1.2863	LIPO	FALSE	FALSE
222	121	A0A291TWQ3|A0A291TWQ3	8.95	32	19	19	0.558824	2.62096	103000000	78800000	57600000	43300000	84258	Oligopeptidase B OS=Aeromonas sp. CA23 OX=2033032 GN=CK910_03310 PE=4 SV=1	K01354				CE10.hmm	0.75	-0.415037	SP	FALSE	FALSE
222	121	A0A291TWQ3|A0A291TWQ3	8.95	32	19	19	0.558824	2.62096	103000000	78800000	57600000	43300000	84258	Oligopeptidase B OS=Aeromonas sp. CA23 OX=2033032 GN=CK910_03310 PE=4 SV=1	K01354				CE1.hmm	0.75	-0.415037	SP	FALSE	FALSE
222	121	A0A291TWQ3|A0A291TWQ3	8.95	32	19	19	0.558824	2.62096	103000000	78800000	57600000	43300000	84258	Oligopeptidase B OS=Aeromonas sp. CA23 OX=2033032 GN=CK910_03310 PE=4 SV=1	K01354				CE7.hmm	0.75	-0.415037	SP	FALSE	FALSE
225	364	A0A291TZ08|A0A291TZ08	3.26	54	13	13	1.625	41.1697	615000000	667000000	380000000	452000000	23639	Stringent starvation protein A OS=Aeromonas sp. CA23 OX=2033032 GN=CK910_07205 PE=3 SV=1	K03599					1.19	0.250962	NO_SP	FALSE	FALSE
226	740	A0A291U706|A0A291U706	5.08	45	10	10	1.66667	45.4159	897000000	555000000	726000000	443000000	21902	ATP-dependent Clp protease proteolytic subunit OS=Aeromonas sp. CA23 OX=2033032 GN=clpP PE=3 SV=1	K01358					0.61	-0.713119	NO_SP	FALSE	FALSE
229	844	A0A291TYE0|A0A291TYE0	21.44	44	11	11	0.846154	6.01704	114000000	654000000	107000000	570000000	39478	Putrescine-binding periplasmic protein OS=Aeromonas sp. CA23 OX=2033032 GN=CK910_05870 PE=3 SV=1	K11073					5.32	2.41143	SP	FALSE	FALSE
230	283	A0A291U1T7|A0A291U1T7	9.76	25	13	12	0.419355	1.62636	35300000	22100000	23200000	13900000	71565	Chemotaxis protein OS=Aeromonas sp. CA23 OX=2033032 GN=CK910_14290 PE=4 SV=1						0.6	-0.736966	NO_SP	FALSE	FALSE
231	139	A0A291TX09|A0A291TX09	0.19	30	15	15	0.652174	3.48925	121000000	62800000	77000000	43400000	66474	50S ribosomal subunit assembly factor BipA OS=Aeromonas sp. CA23 OX=2033032 GN=typA PE=3 SV=1	K06207					0.56	-0.836501	NO_SP	FALSE	FALSE
232	269	A0A291TX00|A0A291TX00	0.82	86	15	15	2.14286	137.95	214000000	189000000	129000000	134000000	18510	50S ribosomal protein L6 OS=Aeromonas sp. CA23 OX=2033032 GN=rplF PE=3 SV=1	K02933					1.04	0.0565835	NO_SP	FALSE	FALSE
233	119	A0A291U2B6|A0A291U2B6	8.95	51	17	17	0.894737	6.8476	279000000	53100000	130000000	31500000	42972	Aminotransferase OS=Aeromonas sp. CA23 OX=2033032 GN=CK910_13015 PE=3 SV=1	K00813					0.24	-2.05889	NO_SP	FALSE	FALSE
235	267	A0A291U6K3|A0A291U6K3	9.2	61	15	15	1.5	30.6228	703000000	449000000	456000000	302000000	26970	30S ribosomal protein S2 OS=Aeromonas sp. CA23 OX=2033032 GN=rpsB PE=3 SV=1	K02967					0.66	-0.599462	NO_SP	FALSE	FALSE
236	942	A0A291TZ05|A0A291TZ05	2.18	37	10	10	0.769231	4.87802	129000000	51900000	98800000	44300000	37472	L-asparaginase 2 OS=Aeromonas sp. CA23 OX=2033032 GN=CK910_07585 PE=3 SV=1	K01424					0.45	-1.152	SP	FALSE	FALSE
237	96	A0A291U0H7|A0A291U0H7	0.24	63	18	18	1.125	12.3352	330000000	194000000	228000000	140000000	43412	PLP-dependent aminotransferase family protein OS=Aeromonas sp. CA23 OX=2033032 GN=CK910_09625 PE=4 SV=1	K05825					0.62	-0.68966	NO_SP	FALSE	FALSE
238	295	A0A291TZF6|A0A291TZF6	3.21	44	13	13	1.44444	26.8256	424000000	506000000	339000000	409000000	28873	Cell division coordinator CpoB OS=Aeromonas sp. CA23 OX=2033032 GN=ygbF PE=3 SV=1					GT41.hmm	1.2	0.263034	SP	FALSE	FALSE
239	256	A0A291TX75|A0A291TX75	8.73	77	12	12	1.5	30.6228	571000000	250000000	395000000	146000000	17353	30S ribosomal protein S5 OS=Aeromonas sp. CA23 OX=2033032 GN=rpsE PE=3 SV=1	K02988					0.37	-1.4344	NO_SP	FALSE	FALSE
240	704	A0A291TWS8|A0A291TWS8	15.17	62	9	9	2.25	176.828	788000000	378000000	521000000	254000000	10440	30S ribosomal protein S19 OS=Aeromonas sp. CA23 OX=2033032 GN=rpsS PE=3 SV=1	K02965					0.49	-1.02915	NO_SP	FALSE	FALSE
242	761	A0A291U225|A0A291U225	13.31	14	12	12	0.230769	0.701254	66700000	14500000	50900000	12200000	115872	Uncharacterized protein OS=Aeromonas sp. CA23 OX=2033032 GN=CK910_14260 PE=4 SV=1	K26063					0.24	-2.05889	NO_SP	FALSE	FALSE
243	921	A0A291U0B1|A0A291U0B1	15.35	31	13	13	0.448276	1.80722	18800000	57400000	11700000	43500000	68794	ABC transporter substrate-binding protein OS=Aeromonas sp. CA23 OX=2033032 GN=CK910_09890 PE=4 SV=1	K13893					3.72	1.8953	SP	FALSE	FALSE
244	572	A0A291TVM0|A0A291TVM0	14.59	45	9	9	1	9	138000000	69800000	96200000	47100000	26710	23S rRNA (guanosine-2'-O-)-methyltransferase RlmB OS=Aeromonas sp. CA23 OX=2033032 GN=rlmB PE=3 SV=1	K03218					0.49	-1.02915	NO_SP	FALSE	FALSE
246	94	A0A291U5A8|A0A291U5A8	9.7	58	17	17	0.708333	4.10897	182000000	23700000	134000000	17300000	42088	T-protein OS=Aeromonas sp. CA23 OX=2033032 GN=tyrA PE=4 SV=1	K14187					0.13	-2.94342	NO_SP	FALSE	FALSE
248	675	A0A291TXH0|A0A291TXH0	3.88	69	19	19	1.9	78.4328	350000000	92600000	237000000	66600000	26161	30S ribosomal protein S3 OS=Aeromonas sp. CA23 OX=2033032 GN=rpsC PE=3 SV=1	K02982					0.28	-1.8365	NO_SP	FALSE	FALSE
252	649	A0A291U4M6|A0A291U4M6	7.13	97	15	15	3.75	5622.41	5320000000	3010000000	4220000000	2400000000	9183	DNA-binding protein HU-beta OS=Aeromonas sp. CA23 OX=2033032 GN=CK910_17905 PE=3 SV=1	K03530					0.57	-0.810966	NO_SP	FALSE	FALSE
253	363	A0A291U1Z8|A0A291U1Z8	10.68	45	16	16	0.941176	7.73326	106000000	240000000	73900000	159000000	44602	Broad specificity amino-acid racemase OS=Aeromonas sp. CA23 OX=2033032 GN=alr PE=3 SV=1	K25317					2.15	1.10434	SP	FALSE	FALSE
254	2721	A0A291U6Z3|A0A291U6Z3	13.8	10	12	12	0.315789	1.06914	5530000	112000000	2780000	62000000	106806	Chitinase OS=Aeromonas sp. CA23 OX=2033032 GN=CK910_09840 PE=3 SV=1	K21606				GH18.hmm	22.33	4.48091	SP	FALSE	FALSE
254	2721	A0A291U6Z3|A0A291U6Z3	13.8	10	12	12	0.315789	1.06914	5530000	112000000	2780000	62000000	106806	Chitinase OS=Aeromonas sp. CA23 OX=2033032 GN=CK910_09840 PE=3 SV=1	K21606				GH18.hmm	22.33	4.48091	SP	FALSE	FALSE
254	2721	A0A291U6Z3|A0A291U6Z3	13.8	10	12	12	0.315789	1.06914	5530000	112000000	2780000	62000000	106806	Chitinase OS=Aeromonas sp. CA23 OX=2033032 GN=CK910_09840 PE=3 SV=1	K21606				CBM5.hmm	22.33	4.48091	SP	FALSE	FALSE
254	2721	A0A291U6Z3|A0A291U6Z3	13.8	10	12	12	0.315789	1.06914	5530000	112000000	2780000	62000000	106806	Chitinase OS=Aeromonas sp. CA23 OX=2033032 GN=CK910_09840 PE=3 SV=1	K21606				CBM5.hmm	22.33	4.48091	SP	FALSE	FALSE
254	2721	A0A291U6Z3|A0A291U6Z3	13.8	10	12	12	0.315789	1.06914	5530000	112000000	2780000	62000000	106806	Chitinase OS=Aeromonas sp. CA23 OX=2033032 GN=CK910_09840 PE=3 SV=1	K21606				CBM5.hmm	22.33	4.48091	SP	FALSE	FALSE
254	2721	A0A291U6Z3|A0A291U6Z3	13.8	10	12	12	0.315789	1.06914	5530000	112000000	2780000	62000000	106806	Chitinase OS=Aeromonas sp. CA23 OX=2033032 GN=CK910_09840 PE=3 SV=1	K21606				CBM5.hmm	22.33	4.48091	SP	FALSE	FALSE
254	2721	A0A291U6Z3|A0A291U6Z3	13.8	10	12	12	0.315789	1.06914	5530000	112000000	2780000	62000000	106806	Chitinase OS=Aeromonas sp. CA23 OX=2033032 GN=CK910_09840 PE=3 SV=1	K21606				CBM12.hmm	22.33	4.48091	SP	FALSE	FALSE
254	2721	A0A291U6Z3|A0A291U6Z3	13.8	10	12	12	0.315789	1.06914	5530000	112000000	2780000	62000000	106806	Chitinase OS=Aeromonas sp. CA23 OX=2033032 GN=CK910_09840 PE=3 SV=1	K21606				CBM12.hmm	22.33	4.48091	SP	FALSE	FALSE
254	2721	A0A291U6Z3|A0A291U6Z3	13.8	10	12	12	0.315789	1.06914	5530000	112000000	2780000	62000000	106806	Chitinase OS=Aeromonas sp. CA23 OX=2033032 GN=CK910_09840 PE=3 SV=1	K21606				CBM12.hmm	22.33	4.48091	SP	FALSE	FALSE
255	274	A0A291TXC2|A0A291TXC2	9.03	21	11	11	0.407407	1.5551	70500000	53600000	58100000	44200000	61876	Signal recognition particle receptor FtsY OS=Aeromonas sp. CA23 OX=2033032 GN=ftsY PE=3 SV=1	K03110					0.76	-0.395929	NO_SP	FALSE	FALSE
256	339	A0A291U385|A0A291U385	17.42	66	13	13	0.928571	7.48343	90300000	184000000	73200000	141000000	31935	2-methylisocitrate lyase OS=Aeromonas sp. CA23 OX=2033032 GN=prpB PE=3 SV=1	K03417					1.93	0.948601	NO_SP	FALSE	FALSE
258	322	A0A291TX69|A0A291TX69	12.74	59	13	13	1.08333	11.1153	1380000000	630000000	1080000000	507000000	20240	50S ribosomal protein L5 OS=Aeromonas sp. CA23 OX=2033032 GN=rplE PE=3 SV=1	K02931					0.47	-1.08927	NO_SP	FALSE	FALSE
259	385	A0A291U3C4|A0A291U3C4	8.8	39	15	15	0.789474	5.15848	166000000	103000000	108000000	77000000	59673	SpoVR family protein OS=Aeromonas sp. CA23 OX=2033032 GN=CK910_15850 PE=4 SV=1						0.71	-0.494109	NO_SP	FALSE	FALSE
261	234	A0A291TWY2|A0A291TWY2	3.33	68	16	16	1.33333	20.5443	226000000	175000000	114000000	97500000	22364	50S ribosomal protein L3 OS=Aeromonas sp. CA23 OX=2033032 GN=rplC PE=3 SV=1	K02906					0.86	-0.217591	NO_SP	FALSE	FALSE
262	252	A0A291U6G2|A0A291U6G2	3.43	27	14	14	0.518519	2.30003	87400000	58800000	72500000	47400000	56429	Murein L D-transpeptidase OS=Aeromonas sp. CA23 OX=2033032 GN=CK910_22225 PE=3 SV=1	K21470					0.65	-0.621488	SP	FALSE	FALSE
265	513	A0A291U4P9|A0A291U4P9	11.06	62	13	13	1.3	18.9526	521000000	1300000000	383000000	988000000	29635	Glucosamine-6-phosphate deaminase OS=Aeromonas sp. CA23 OX=2033032 GN=nagB PE=3 SV=1	K02564					2.58	1.36737	NO_SP	FALSE	FALSE
266	330	A0A291TWS2|A0A291TWS2	16.16	70	14	14	1.55556	34.9381	457000000	153000000	292000000	100000000	25229	Carbonic anhydrase OS=Aeromonas sp. CA23 OX=2033032 GN=CK910_03170 PE=3 SV=1	K01673					0.34	-1.55639	NO_SP	FALSE	FALSE
267	985	A0A291U366|A0A291U366	12.77	16	8	5	0.363636	1.31013	9950000	16600000	7750000	12500000	60501	Chemotaxis protein OS=Aeromonas sp. CA23 OX=2033032 GN=CK910_15730 PE=4 SV=1	K03406					1.62	0.695994	NO_SP	FALSE	FALSE
268	1033	A0A291U0V2|A0A291U0V2	1.1	18	11	11	0.261905	0.827699	65400000	18800000	42800000	12600000	107010	Formate dehydrogenase OS=Aeromonas sp. CA23 OX=2033032 GN=CK910_11715 PE=4 SV=1	K00123					0.29	-1.78588	TAT	FALSE	FALSE
269	240	A0A291U1M9|A0A291U1M9	7.56	17	10	10	0.5	2.16228	115000000	63700000	75600000	39900000	76895	Pilus assembly protein FimV OS=Aeromonas sp. CA23 OX=2033032 GN=CK910_13830 PE=4 SV=1	K08086				CBM50.hmm	0.53	-0.915936	SP	FALSE	FALSE
270	146	A0A291TVK4|A0A291TVK4	6.08	47	21	21	0.84	5.91831	280000000	394000000	187000000	260000000	47986	Chaperone SurA OS=Aeromonas sp. CA23 OX=2033032 GN=surA PE=3 SV=1	K03771					1.39	0.475085	SP	FALSE	FALSE
272	691	A0A291TW10|A0A291TW10	16.01	49	12	12	0.75	4.62341	72400000	290000000	43300000	163000000	37288	Iron ABC transporter substrate-binding protein OS=Aeromonas sp. CA23 OX=2033032 GN=CK910_01755 PE=4 SV=1	K02012					3.77	1.91456	SP	FALSE	FALSE
274	407	A0A291U6E1|A0A291U6E1	12.46	74	15	15	1.07143	10.7877	176000000	89300000	98800000	53800000	27313	Thioredoxin domain-containing protein OS=Aeromonas sp. CA23 OX=2033032 GN=CK910_23095 PE=4 SV=1						0.55	-0.862496	SP	FALSE	FALSE
275	442	A0A291U5V8|A0A291U5V8	10.88	45	16	16	0.615385	3.12463	94000000	343000000	68400000	243000000	55185	Aldehyde dehydrogenase OS=Aeromonas sp. CA23 OX=2033032 GN=CK910_22085 PE=3 SV=1	K00138					3.55	1.82782	NO_SP	FALSE	FALSE
278	296	A0A291TYK3|A0A291TYK3	10.44	65	14	14	1	9	164000000	87000000	96400000	57000000	28878	Outer membrane protein assembly factor BamD OS=Aeromonas sp. CA23 OX=2033032 GN=bamD PE=3 SV=1	K05807					0.59	-0.761213	LIPO	FALSE	FALSE
279	395	A0A291U6L7|A0A291U6L7	8.59	40	11	11	1.22222	15.681	311000000	145000000	175000000	100000000	34351	Transcriptional regulator OS=Aeromonas sp. CA23 OX=2033032 GN=CK910_22475 PE=4 SV=1	K05775					0.57	-0.810966	LIPO	FALSE	FALSE
280	219	A0A291TVT8|A0A291TVT8	0.92	50	12	12	0.75	4.62341	121000000	62600000	59500000	32300000	33167	Peroxidase OS=Aeromonas sp. CA23 OX=2033032 GN=CK910_01740 PE=4 SV=1	K07223					0.54	-0.888969	NO_SP	FALSE	FALSE
281	255	A0A291TY88|A0A291TY88	2.36	36	11	11	0.6875	3.86968	182000000	135000000	130000000	87600000	38721	Porin OmpA OS=Aeromonas sp. CA23 OX=2033032 GN=CK910_05565 PE=3 SV=1	K03286					0.68	-0.556393	SP	FALSE	FALSE
283	495	A0A291U742|A0A291U742	7.92	45	16	16	0.888889	6.74264	194000000	73100000	104000000	40400000	42533	Protein HflK OS=Aeromonas sp. CA23 OX=2033032 GN=hflK PE=3 SV=1	K04088					0.39	-1.35845	NO_SP	FALSE	FALSE
286	926	A0A291TWC8|A0A291TWC8	6.77	40	6	6	1.5	30.6228	536000000	302000000	384000000	237000000	15902	Type II secretion system core protein G OS=Aeromonas sp. CA23 OX=2033032 GN=gspG PE=3 SV=1	K02456					0.62	-0.68966	PILIN	FALSE	FALSE
287	934	A0A291TYX2|A0A291TYX2	4.97	97	10	10	2.5	315.228	634000000	242000000	277000000	136000000	10922	Ribosome hibernation promoting factor OS=Aeromonas sp. CA23 OX=2033032 GN=CK910_07090 PE=4 SV=1	K05808					0.49	-1.02915	NO_SP	FALSE	FALSE
288	543	A0A291U0V9|A0A291U0V9	4.23	26	10	7	0.416667	1.61016	15700000	9920000	11700000	8520000	58933	Chemotaxis protein OS=Aeromonas sp. CA23 OX=2033032 GN=CK910_11030 PE=4 SV=1	K03406					0.73	-0.454032	NO_SP	FALSE	FALSE
289	188	A0A291TYL6|A0A291TYL6	2.62	10	12	12	0.1875	0.539927	41200000	36900000	26000000	23600000	150193	DNA-directed RNA polymerase subunit beta OS=Aeromonas sp. CA23 OX=2033032 GN=rpoB PE=3 SV=1	K03043					0.91	-0.136062	NO_SP	FALSE	FALSE
290	218	A0A291TVQ6|A0A291TVQ6	1.32	21	15	15	0.333333	1.15443	45600000	26000000	30600000	15100000	106168	Isoleucine--tRNA ligase OS=Aeromonas sp. CA23 OX=2033032 GN=ileS PE=3 SV=1	K01870					0.49	-1.02915	NO_SP	FALSE	FALSE
291	334	A0A291TY70|A0A291TY70	6.62	58	14	14	1.55556	34.9381	204000000	147000000	75900000	58200000	14989	50S ribosomal protein L11 OS=Aeromonas sp. CA23 OX=2033032 GN=rplK PE=3 SV=1	K02867					0.77	-0.37707	NO_SP	FALSE	FALSE
296	286	A0A291U5L3|A0A291U5L3	17.12	53	15	15	1.07143	10.7877	156000000	65500000	74700000	40200000	41377	Cell division protein ZipA OS=Aeromonas sp. CA23 OX=2033032 GN=zipA PE=3 SV=1	K03528					0.54	-0.888969	NO_SP	FALSE	FALSE
297	250	A0A291U0X0|A0A291U0X0	7.66	49	14	14	0.875	6.49894	101000000	47100000	56500000	27900000	43726	Tyrosine--tRNA ligase OS=Aeromonas sp. CA23 OX=2033032 GN=tyrS PE=3 SV=1	K01866					0.49	-1.02915	NO_SP	FALSE	FALSE
298	305	A0A291U161|A0A291U161	11.82	68	13	13	1.08333	11.1153	278000000	137000000	137000000	65000000	22612	Uracil phosphoribosyltransferase OS=Aeromonas sp. CA23 OX=2033032 GN=upp PE=3 SV=1	K00761					0.47	-1.08927	NO_SP	FALSE	FALSE
299	162	A0A291U4Y7|A0A291U4Y7	4.42	48	16	16	0.761905	4.77969	109000000	136000000	65800000	99900000	45701	Aminopeptidase PepB OS=Aeromonas sp. CA23 OX=2033032 GN=CK910_19095 PE=3 SV=1	K07751				CBM12.hmm	1.52	0.604071	NO_SP	FALSE	FALSE
300	210	A0A291TY36|A0A291TY36	8.41	38	19	19	0.95	7.91251	97300000	214000000	48700000	105000000	50420	Glutamine synthetase OS=Aeromonas sp. CA23 OX=2033032 GN=CK910_05855 PE=3 SV=1	K01915					2.16	1.11103	NO_SP	FALSE	FALSE
303	246	A0A291U2F5|A0A291U2F5	2.43	42	10	10	0.769231	4.87802	46200000	43400000	22900000	26400000	35687	2-keto-4-pentenoate hydratase OS=Aeromonas sp. CA23 OX=2033032 GN=CK910_14195 PE=4 SV=1	K16171					1.15	0.201634	NO_SP	FALSE	FALSE
307	542	A0A291U3M9|A0A291U3M9	22.23	52	14	14	2	99	479000000	101000000	317000000	68800000	20768	Phosphohistidine phosphatase OS=Aeromonas sp. CA23 OX=2033032 GN=CK910_16680 PE=4 SV=1						0.22	-2.18442	NO_SP	FALSE	FALSE
309	662	A0A291U3Y8|A0A291U3Y8	3.05	83	10	10	2.5	315.228	697000000	770000000	667000000	747000000	10648	Integration host factor subunit beta OS=Aeromonas sp. CA23 OX=2033032 GN=ihfB PE=3 SV=1	K05788					1.12	0.163499	NO_SP	FALSE	FALSE
310	526	A0A291TWK7|A0A291TWK7	5.56	34	13	13	0.8125	5.49382	138000000	151000000	65800000	87900000	54342	Aerolysin family beta-barrel pore-forming toxin OS=Aeromonas sp. CA23 OX=2033032 GN=CK910_02845 PE=3 SV=1						1.33	0.411426	SP	FALSE	FALSE
311	359	A0A291U5C3|A0A291U5C3	6.68	42	12	12	0.631579	3.28133	313000000	189000000	273000000	158000000	45288	Uncharacterized protein OS=Aeromonas sp. CA23 OX=2033032 GN=CK910_21705 PE=4 SV=1						0.58	-0.785875	LIPO	FALSE	FALSE
312	273	A0A291U3U6|A0A291U3U6	3.4	22	13	12	0.52	2.31131	76000000	35800000	46600000	23800000	46440	ATP-dependent Clp protease ATP-binding subunit ClpX OS=Aeromonas sp. CA23 OX=2033032 GN=clpX PE=3 SV=1	K03544					0.51	-0.971431	NO_SP	FALSE	FALSE
313	411	A0A291U212|A0A291U212	0.31	39	11	11	1.375	22.7137	162000000	139000000	90600000	89400000	26404	Uncharacterized protein OS=Aeromonas sp. CA23 OX=2033032 GN=CK910_13740 PE=4 SV=1	K09807					0.99	-0.0144996	SP	FALSE	FALSE
314	290	A0A291U3A7|A0A291U3A7	20.75	37	12	12	0.5	2.16228	37200000	3270000	26500000	2230000	50653	Uncharacterized protein OS=Aeromonas sp. CA23 OX=2033032 GN=CK910_15010 PE=4 SV=1	K07126					0.08	-3.64386	LIPO	FALSE	FALSE
315	356	A0A291TYR8|A0A291TYR8	16.36	19	8	6	0.333333	1.15443	10200000	3790000	6360000	2180000	70992	Methyl-accepting chemotaxis protein OS=Aeromonas sp. CA23 OX=2033032 GN=CK910_06730 PE=4 SV=1	K03406					0.34	-1.55639	NO_SP	FALSE	FALSE
317	127	A0A291U2T1|A0A291U2T1	16.15	38	14	14	0.7	4.01187	182000000	1280000	128000000	80200	46101	Anaerobic glycerol-3-phosphate dehydrogenase subunit B OS=Aeromonas sp. CA23 OX=2033032 GN=CK910_15715 PE=4 SV=1	K00112					0.02	-5.64386	NO_SP	FALSE	FALSE
318	241	A0A291TYP1|A0A291TYP1	14.37	72	12	12	2	99	555000000	403000000	333000000	257000000	17711	50S ribosomal protein L10 OS=Aeromonas sp. CA23 OX=2033032 GN=rplJ PE=3 SV=1	K02864					0.77	-0.37707	NO_SP	FALSE	FALSE
319	813	A0A291TZQ0|A0A291TZQ0	9.24	79	9	9	2.25	176.828	2230000000	1120000000	1660000000	769000000	9399	DNA-binding protein HU-alpha OS=Aeromonas sp. CA23 OX=2033032 GN=CK910_08680 PE=3 SV=1	K05787					0.46	-1.12029	NO_SP	FALSE	FALSE
320	569	A0A291U4I0|A0A291U4I0	5.15	28	13	13	0.684211	3.83293	176000000	86100000	113000000	55700000	54347	Aryl-phospho-beta-D-glucosidase OS=Aeromonas sp. CA23 OX=2033032 GN=CK910_17575 PE=3 SV=1	K01223				GH1.hmm	0.49	-1.02915	NO_SP	FALSE	FALSE
320	569	A0A291U4I0|A0A291U4I0	5.15	28	13	13	0.684211	3.83293	176000000	86100000	113000000	55700000	54347	Aryl-phospho-beta-D-glucosidase OS=Aeromonas sp. CA23 OX=2033032 GN=CK910_17575 PE=3 SV=1	K01223				GH5.hmm	0.49	-1.02915	NO_SP	FALSE	FALSE
320	569	A0A291U4I0|A0A291U4I0	5.15	28	13	13	0.684211	3.83293	176000000	86100000	113000000	55700000	54347	Aryl-phospho-beta-D-glucosidase OS=Aeromonas sp. CA23 OX=2033032 GN=CK910_17575 PE=3 SV=1	K01223				GH10.hmm	0.49	-1.02915	NO_SP	FALSE	FALSE
320	569	A0A291U4I0|A0A291U4I0	5.15	28	13	13	0.684211	3.83293	176000000	86100000	113000000	55700000	54347	Aryl-phospho-beta-D-glucosidase OS=Aeromonas sp. CA23 OX=2033032 GN=CK910_17575 PE=3 SV=1	K01223				GH10.hmm	0.49	-1.02915	NO_SP	FALSE	FALSE
320	569	A0A291U4I0|A0A291U4I0	5.15	28	13	13	0.684211	3.83293	176000000	86100000	113000000	55700000	54347	Aryl-phospho-beta-D-glucosidase OS=Aeromonas sp. CA23 OX=2033032 GN=CK910_17575 PE=3 SV=1	K01223				GH39.hmm	0.49	-1.02915	NO_SP	FALSE	FALSE
320	569	A0A291U4I0|A0A291U4I0	5.15	28	13	13	0.684211	3.83293	176000000	86100000	113000000	55700000	54347	Aryl-phospho-beta-D-glucosidase OS=Aeromonas sp. CA23 OX=2033032 GN=CK910_17575 PE=3 SV=1	K01223				GH39.hmm	0.49	-1.02915	NO_SP	FALSE	FALSE
321	1001	A0A291TYV9|A0A291TYV9	12.67	38	3	3	1	9	1940000000	776000000	1510000000	609000000	12332	UPF0265 protein CK910_07005 OS=Aeromonas sp. CA23 OX=2033032 GN=CK910_07005 PE=3 SV=1	K09802					0.4	-1.32193	NO_SP	FALSE	FALSE
322	117	A0A291U7J0|A0A291U7J0	2.65	38	20	19	0.8	5.30957	158000000	124000000	75400000	71700000	51189	Sigma-54-dependent Fis family transcriptional regulator OS=Aeromonas sp. CA23 OX=2033032 GN=CK910_23510 PE=4 SV=1	K10912					0.95	-0.0740006	NO_SP	FALSE	FALSE
328	360	A0A291TY18|A0A291TY18	2.83	30	13	13	0.8125	5.49382	117000000	132000000	80900000	98300000	50042	Xaa-Pro dipeptidase OS=Aeromonas sp. CA23 OX=2033032 GN=pepQ PE=3 SV=1	K01271					1.22	0.286881	NO_SP	FALSE	FALSE
329	392	A0A291TVL8|A0A291TVL8	27.78	70	15	15	0.9375	7.65964	128000000	24500000	85400000	18400000	35738	Octaprenyl diphosphate synthase OS=Aeromonas sp. CA23 OX=2033032 GN=CK910_00330 PE=3 SV=1	K02523					0.21	-2.25154	NO_SP	FALSE	CORRECT
330	277	A0A291U6E7|A0A291U6E7	29.01	62	13	13	1.18182	14.1991	626000000	1140000	565000000	409000	29039	Alpha-acetolactate decarboxylase OS=Aeromonas sp. CA23 OX=2033032 GN=budA PE=3 SV=1	K01575					0.02	-5.64386	NO_SP	FALSE	CORRECT
331	301	A0A291TW67|A0A291TW67	5.35	20	14	14	0.368421	1.33572	138000000	151000000	120000000	94100000	90585	Ribonuclease R OS=Aeromonas sp. CA23 OX=2033032 GN=rnr PE=3 SV=1	K12573					0.78	-0.358454	NO_SP	FALSE	FALSE
332	325	A0A291U0U9|A0A291U0U9	5.33	24	14	11	0.56	2.63078	34000000	40400000	15600000	23500000	67338	Chemotaxis protein OS=Aeromonas sp. CA23 OX=2033032 GN=CK910_10980 PE=4 SV=1	K03406					1.5	0.584963	NO_SP	FALSE	FALSE
334	514	A0A291TYC6|A0A291TYC6	9.4	12	11	11	0.22	0.659587	14400000	9890000	9460000	6830000	115408	Carboxypeptidase OS=Aeromonas sp. CA23 OX=2033032 GN=CK910_07010 PE=4 SV=1					GT51.hmm	0.72	-0.473931	NO_SP	FALSE	FALSE
335	447	A0A291TWL6|A0A291TWL6	8.3	31	13	13	0.5	2.16228	88500000	46400000	69300000	33800000	59999	Pilus (MSHA type) biogenesis protein MshL OS=Aeromonas sp. CA23 OX=2033032 GN=CK910_03095 PE=4 SV=1	K12282					0.49	-1.02915	LIPO	FALSE	FALSE
336	463	A0A291TWA4|A0A291TWA4	8.58	44	11	11	1	9	102000000	188000000	79800000	146000000	27136	Molecular chaperone OS=Aeromonas sp. CA23 OX=2033032 GN=CK910_02430 PE=3 SV=1	K12519					1.83	0.871844	SP	FALSE	FALSE
337	257	A0A291U4H7|A0A291U4H7	6.11	50	12	12	0.8	5.30957	173000000	74000000	156000000	63700000	36521	Low-specificity L-threonine aldolase OS=Aeromonas sp. CA23 OX=2033032 GN=CK910_18880 PE=3 SV=1	K01620					0.41	-1.2863	NO_SP	FALSE	FALSE
338	409	A0A291TYA4|A0A291TYA4	0.31	23	10	10	0.294118	0.968419	18200000	18000000	12200000	12100000	75141	Glycine--tRNA ligase beta subunit OS=Aeromonas sp. CA23 OX=2033032 GN=glyS PE=3 SV=1	K01879					0.99	-0.0144996	NO_SP	FALSE	FALSE
339	678	A0A291U4U2|A0A291U4U2	3.37	43	11	11	0.785714	5.1054	194000000	110000000	139000000	92200000	29688	Type IV pilus biogenesis/stability protein PilW OS=Aeromonas sp. CA23 OX=2033032 GN=CK910_19080 PE=4 SV=1	K02656				GT41.hmm	0.66	-0.599462	LIPO	FALSE	FALSE
339	678	A0A291U4U2|A0A291U4U2	3.37	43	11	11	0.785714	5.1054	194000000	110000000	139000000	92200000	29688	Type IV pilus biogenesis/stability protein PilW OS=Aeromonas sp. CA23 OX=2033032 GN=CK910_19080 PE=4 SV=1	K02656				GT41.hmm	0.66	-0.599462	LIPO	FALSE	FALSE
340	1150	A0A291TWX6|A0A291TWX6	20.5	36	13	13	0.684211	3.83293	14400000	245000000	8470000	191000000	39878	C4-dicarboxylate ABC transporter substrate-binding protein OS=Aeromonas sp. CA23 OX=2033032 GN=CK910_03305 PE=4 SV=1	K07080					22.58	4.49697	NO_SP	FALSE	FALSE
341	302	A0A291U6G7|A0A291U6G7	2.47	39	10	10	0.625	3.21697	66800000	79400000	45700000	49200000	31579	Transcriptional regulator HexR OS=Aeromonas sp. CA23 OX=2033032 GN=CK910_21360 PE=4 SV=1	K19337					1.08	0.111031	NO_SP	FALSE	FALSE
344	242	A0A291TWR3|A0A291TWR3	5.82	56	14	14	0.933333	7.57696	180000000	116000000	115000000	75500000	29993	50S ribosomal protein L2 OS=Aeromonas sp. CA23 OX=2033032 GN=rplB PE=3 SV=1	K02886					0.65	-0.621488	NO_SP	FALSE	FALSE
346	384	A0A291U5J6|A0A291U5J6	3.72	43	10	10	0.5	2.16228	44600000	74500000	32700000	51500000	36399	LacI/PurR family transcriptional regulator OS=Aeromonas sp. CA23 OX=2033032 GN=CK910_20170 PE=4 SV=1	K02529					1.58	0.659925	NO_SP	FALSE	FALSE
348	232	A0A291U416|A0A291U416	3.02	20	14	14	0.411765	1.58086	35000000	44000000	19100000	24900000	98005	Aminopeptidase N OS=Aeromonas sp. CA23 OX=2033032 GN=CK910_16595 PE=3 SV=1	K01256					1.3	0.378512	NO_SP	FALSE	FALSE
349	314	A0A291TWF2|A0A291TWF2	14.47	75	13	13	1.44444	26.8256	1070000000	815000000	613000000	422000000	15359	50S ribosomal protein L9 OS=Aeromonas sp. CA23 OX=2033032 GN=rplI PE=3 SV=1	K02939					0.69	-0.535332	NO_SP	FALSE	FALSE
350	768	A0A291U7E8|A0A291U7E8	0.11	60	14	14	1	9	66300000	55600000	45500000	33000000	27052	ATP-dependent Zn protease OS=Aeromonas sp. CA23 OX=2033032 GN=CK910_20390 PE=4 SV=1						0.73	-0.454032	NO_SP	FALSE	FALSE
351	441	A0A291U4X9|A0A291U4X9	15.64	40	11	11	0.846154	6.01704	127000000	83000000	99000000	64100000	34515	Lipoprotein NlpI OS=Aeromonas sp. CA23 OX=2033032 GN=CK910_19165 PE=4 SV=1	K05803				GT41.hmm	0.65	-0.621488	LIPO	FALSE	FALSE
352	264	A0A291TX73|A0A291TX73	15.09	59	14	14	1.75	55.2341	324000000	193000000	166000000	108000000	22197	50S ribosomal protein L4 OS=Aeromonas sp. CA23 OX=2033032 GN=rplD PE=3 SV=1	K02926					0.65	-0.621488	NO_SP	FALSE	FALSE
353	311	A0A291U359|A0A291U359	0.88	51	17	17	1.54545	34.1119	270000000	183000000	106000000	79600000	35707	Universal stress protein UspE OS=Aeromonas sp. CA23 OX=2033032 GN=CK910_16525 PE=4 SV=1	K14055					0.75	-0.415037	NO_SP	FALSE	FALSE
354	225	A0A291TVI5|A0A291TVI5	3.86	50	14	14	1.07692	10.9378	764000000	610000000	549000000	412000000	32861	DNA-directed RNA polymerase subunit delta OS=Aeromonas sp. CA23 OX=2033032 GN=CK910_01270 PE=3 SV=1						0.75	-0.415037	SP	FALSE	FALSE
355	1129	A0A291U5P6|A0A291U5P6	11.15	47	14	14	0.7	4.01187	103000000	1860000	50200000	119000	48323	Glutamate dehydrogenase OS=Aeromonas sp. CA23 OX=2033032 GN=CK910_19845 PE=3 SV=1	K00262					0.02	-5.64386	NO_SP	FALSE	FALSE
356	420	A0A291TZE0|A0A291TZE0	3.45	53	10	10	0.833333	5.81292	297000000	61900000	243000000	37700000	23490	TetR/AcrR family transcriptional regulator OS=Aeromonas sp. CA23 OX=2033032 GN=CK910_09310 PE=4 SV=1	K10913					0.15	-2.73697	NO_SP	FALSE	FALSE
357	335	A0A291TYH4|A0A291TYH4	0.27	20	11	11	1	9	219000000	212000000	94300000	95100000	51803	NAD(P) transhydrogenase subunit beta OS=Aeromonas sp. CA23 OX=2033032 GN=CK910_06165 PE=3 SV=1	K00325					1.01	0.0143553	NO_SP	FALSE	FALSE
358	766	A0A291U6P1|A0A291U6P1	6.77	27	15	12	0.483871	2.04699	30500000	37100000	21900000	28500000	76144	Chemotaxis protein OS=Aeromonas sp. CA23 OX=2033032 GN=CK910_22585 PE=4 SV=1	K03406					1.3	0.378512	NO_SP	FALSE	FALSE
359	348	A0A291U2D3|A0A291U2D3	16.69	28	13	13	0.52	2.31131	58100000	18700000	35100000	10100000	51814	D-alanyl-D-alanine carboxypeptidase/D-alanyl-D-alanine-endopeptidase OS=Aeromonas sp. CA23 OX=2033032 GN=dacB PE=3 SV=1	K07259					0.29	-1.78588	SP	FALSE	FALSE
361	284	A0A291TVT3|A0A291TVT3	21.19	34	9	9	0.642857	3.39397	57600000	7350000	36800000	3430000	52406	Aspartate ammonia-lyase OS=Aeromonas sp. CA23 OX=2033032 GN=aspA PE=3 SV=1	K01744					0.09	-3.47393	NO_SP	FALSE	FALSE
362	377	A0A291U2K2|A0A291U2K2	14.89	78	15	15	1.36364	22.1013	389000000	32300000	238000000	20600000	18668	Type VI secretion system contractile sheath small subunit OS=Aeromonas sp. CA23 OX=2033032 GN=CK910_15015 PE=4 SV=1	K11901					0.09	-3.47393	NO_SP	FALSE	FALSE
364	306	A0A291U2Y6|A0A291U2Y6	7.78	33	11	11	0.578947	2.79269	28400000	30600000	18500000	22100000	52638	Diacylglycerol O-acyltransferase OS=Aeromonas sp. CA23 OX=2033032 GN=CK910_16700 PE=3 SV=1	K00635					1.19	0.250962	NO_SP	FALSE	FALSE
365	466	A0A291U3T1|A0A291U3T1	1.68	10	8	8	0.210526	0.623777	31400000	31400000	24500000	23600000	115395	Ribonuclease E OS=Aeromonas sp. CA23 OX=2033032 GN=rne PE=3 SV=1	K08300					0.96	-0.0588937	NO_SP	FALSE	FALSE
366	193	A0A291TYP5|A0A291TYP5	7.11	45	14	13	0.736842	4.45559	91300000	60100000	40100000	29500000	53227	Sugar ABC transporter substrate-binding protein OS=Aeromonas sp. CA23 OX=2033032 GN=CK910_06950 PE=3 SV=1	K10117					0.74	-0.434403	SP	FALSE	FALSE
367	272	A0A291U5T2|A0A291U5T2	9.06	42	14	14	0.736842	4.45559	203000000	148000000	102000000	67800000	47128	C-type cytochrome biogenesis protein CcmI OS=Aeromonas sp. CA23 OX=2033032 GN=ccmI PE=4 SV=1					GT41.hmm	0.66	-0.599462	NO_SP	FALSE	FALSE
368	303	A0A291TX04|A0A291TX04	30.37	19	11	11	0.354839	1.2638	82300000	2820000	60200000	2540000	81653	SAM-dependent methyltransferase OS=Aeromonas sp. CA23 OX=2033032 GN=CK910_03980 PE=4 SV=1						0.04	-4.64386	NO_SP	FALSE	CORRECT
369	129	A0A291U226|A0A291U226	2.14	41	15	15	0.714286	4.17947	262000000	142000000	198000000	108000000	51234	Cysteine--tRNA ligase OS=Aeromonas sp. CA23 OX=2033032 GN=cysS PE=3 SV=1	K01883					0.54	-0.888969	NO_SP	FALSE	FALSE
370	588	A0A291U4C2|A0A291U4C2	5.48	43	10	10	1	9	167000000	96900000	116000000	67200000	33539	Helix-turn-helix domain-containing protein OS=Aeromonas sp. CA23 OX=2033032 GN=CK910_19075 PE=4 SV=1	K15539					0.58	-0.785875	NO_SP	FALSE	FALSE
372	180	A0A291U153|A0A291U153	3.7	52	12	12	0.857143	6.19686	90000000	104000000	42800000	55200000	27244	YciK family oxidoreductase OS=Aeromonas sp. CA23 OX=2033032 GN=CK910_11520 PE=4 SV=1						1.29	0.367371	NO_SP	FALSE	FALSE
373	190	A0A291TWD3|A0A291TWD3	16.77	44	13	12	0.8125	5.49382	117000000	10500000	78500000	8360000	41032	Alkene reductase OS=Aeromonas sp. CA23 OX=2033032 GN=CK910_01335 PE=4 SV=1	K10680					0.11	-3.18442	NO_SP	FALSE	FALSE
375	293	A0A291U2W3|A0A291U2W3	26.46	67	12	12	1.09091	11.3285	410000000	177000000	360000000	166000000	34170	Thioredoxin reductase OS=Aeromonas sp. CA23 OX=2033032 GN=trxB PE=3 SV=1	K00384					0.46	-1.12029	NO_SP	FALSE	CORRECT
381	459	A0A291U6T9|A0A291U6T9	0.94	46	14	14	2.33333	214.443	686000000	631000000	594000000	537000000	27726	Na(+)-translocating NADH-quinone reductase subunit C OS=Aeromonas sp. CA23 OX=2033032 GN=nqrC PE=3 SV=1	K00348					0.9	-0.152003	NO_SP	FALSE	FALSE
382	582	A0A291U5R2|A0A291U5R2	5.66	53	12	12	1.33333	20.5443	170000000	46200000	113000000	32800000	26904	Uridine phosphorylase OS=Aeromonas sp. CA23 OX=2033032 GN=CK910_20670 PE=3 SV=1	K00757					0.29	-1.78588	NO_SP	FALSE	FALSE
383	387	A0A291U021|A0A291U021	10.51	76	12	12	1.33333	20.5443	624000000	340000000	423000000	257000000	19574	Inorganic pyrophosphatase OS=Aeromonas sp. CA23 OX=2033032 GN=ppa PE=3 SV=1	K01507					0.61	-0.713119	NO_SP	FALSE	FALSE
385	1059	A0A291U4H9|A0A291U4H9	14.82	16	5	2	0.151515	0.417474	2760000	151000	2760000	151000	73237	Chemotaxis protein OS=Aeromonas sp. CA23 OX=2033032 GN=CK910_19895 PE=4 SV=1	K03406					0.05	-4.32193	NO_SP	FALSE	FALSE
386	888	A0A291U0V7|A0A291U0V7	5.25	19	12	12	0.352941	1.25393	21400000	19200000	11200000	13800000	91360	Penicillin-binding protein 1A OS=Aeromonas sp. CA23 OX=2033032 GN=CK910_11040 PE=3 SV=1	K05366				GT51.hmm	1.24	0.31034	NO_SP	FALSE	FALSE
387	165	A0A291TYE3|A0A291TYE3	2.12	28	11	11	0.323529	1.10634	20800000	6890000	12300000	4430000	64771	Arginine--tRNA ligase OS=Aeromonas sp. CA23 OX=2033032 GN=argS PE=3 SV=1	K01887					0.36	-1.47393	NO_SP	FALSE	FALSE
388	573	A0A291U189|A0A291U189	14.38	11	5	5	0.217391	0.649648	20000000	137000000	15100000	133000000	53896	Multifunctional fusion protein OS=Aeromonas sp. CA23 OX=2033032 GN=trpC PE=3 SV=1	K13498					8.8	3.1375	NO_SP	FALSE	FALSE
389	308	A0A291U0J6|A0A291U0J6	6.53	45	14	14	0.7	4.01187	64300000	123000000	37600000	75700000	40007	3 4-dihydroxy-2-butanone 4-phosphate synthase OS=Aeromonas sp. CA23 OX=2033032 GN=ribB PE=3 SV=1	K14652					2.01	1.0072	NO_SP	FALSE	FALSE
391	186	A0A291TY42|A0A291TY42	10.06	38	11	11	0.6875	3.86968	85800000	22600000	61700000	15900000	32910	YicC family protein OS=Aeromonas sp. CA23 OX=2033032 GN=CK910_05455 PE=4 SV=1						0.26	-1.94342	NO_SP	FALSE	FALSE
394	587	A0A291TX79|A0A291TX79	9.48	49	12	12	0.857143	6.19686	69300000	164000000	45800000	123000000	27962	Amino acid ABC transporter substrate-binding protein OS=Aeromonas sp. CA23 OX=2033032 GN=CK910_04685 PE=4 SV=1	K16961					2.69	1.42761	SP	FALSE	FALSE
395	444	A0A291TXC9|A0A291TXC9	4.59	36	13	11	1.3	18.9526	99400000	136000000	50200000	72600000	38940	Alanine dehydrogenase OS=Aeromonas sp. CA23 OX=2033032 GN=ald PE=3 SV=1	K00259					1.45	0.536053	NO_SP	FALSE	FALSE
396	342	A0A291U2G6|A0A291U2G6	20.38	24	12	12	0.48	2.01995	44600000	14900000	26800000	10100000	54424	Uncharacterized protein OS=Aeromonas sp. CA23 OX=2033032 GN=CK910_15085 PE=4 SV=1	K11911					0.38	-1.39593	NO_SP	FALSE	FALSE
399	207	A0A291TVG8|A0A291TVG8	8.07	65	14	14	1.07692	10.9378	316000000	212000000	183000000	113000000	23799	cAMP-activated global transcriptional regulator CRP OS=Aeromonas sp. CA23 OX=2033032 GN=CK910_00060 PE=4 SV=1	K10914					0.62	-0.68966	NO_SP	FALSE	FALSE
400	371	A0A291TY85|A0A291TY85	8.45	55	10	10	1	9	455000000	266000000	246000000	147000000	20994	Transcription termination/antitermination protein NusG OS=Aeromonas sp. CA23 OX=2033032 GN=nusG PE=3 SV=1	K02601					0.6	-0.736966	NO_SP	FALSE	FALSE
401	646	A0A291U0P3|A0A291U0P3	10.55	53	8	8	1.6	38.8107	510000000	243000000	367000000	177000000	13653	META domain-containing protein OS=Aeromonas sp. CA23 OX=2033032 GN=CK910_11920 PE=4 SV=1	K03668					0.48	-1.05889	LIPO	FALSE	FALSE
403	565	A0A291TX63|A0A291TX63	16.95	70	11	11	2.2	157.489	586000000	301000000	362000000	189000000	11335	50S ribosomal protein L24 OS=Aeromonas sp. CA23 OX=2033032 GN=rplX PE=3 SV=1	K02895					0.52	-0.943416	NO_SP	FALSE	FALSE
405	369	A0A291TX61|A0A291TX61	15.62	67	13	13	1.85714	70.9686	852000000	581000000	747000000	516000000	13201	30S ribosomal protein S13 OS=Aeromonas sp. CA23 OX=2033032 GN=rpsM PE=3 SV=1	K02952					0.69	-0.535332	NO_SP	FALSE	FALSE
406	203	A0A291TWE9|A0A291TWE9	0.22	47	10	10	0.625	3.21697	174000000	151000000	149000000	131000000	45169	O-acetylhomoserine aminocarboxypropyltransferase OS=Aeromonas sp. CA23 OX=2033032 GN=CK910_02505 PE=3 SV=1	K01740					0.88	-0.184425	NO_SP	FALSE	FALSE
407	287	A0A291U0S9|A0A291U0S9	24.16	49	13	13	0.764706	4.81709	96200000	35900000	73200000	28200000	39519	Ribosome-binding ATPase YchF OS=Aeromonas sp. CA23 OX=2033032 GN=ychF PE=3 SV=1	K06942					0.39	-1.35845	NO_SP	FALSE	CORRECT
408	1061	A0A291U4A5|A0A291U4A5	5.46	7	3	3	0.12	0.318257	15100000	11300000	10700000	6640000	60889	Chemotaxis protein OS=Aeromonas sp. CA23 OX=2033032 GN=CK910_18445 PE=4 SV=1	K03406					0.62	-0.68966	NO_SP	FALSE	FALSE
409	309	A0A291TXR3|A0A291TXR3	0.12	50	11	11	0.916667	7.25404	162000000	159000000	97600000	97100000	22681	Thiol:disulfide interchange protein OS=Aeromonas sp. CA23 OX=2033032 GN=CK910_05500 PE=3 SV=1	K03673					1	0	SP	FALSE	FALSE
411	552	A0A291U6B8|A0A291U6B8	7.89	39	14	14	0.933333	7.57696	115000000	57700000	73000000	38300000	31398	Formyltetrahydrofolate deformylase OS=Aeromonas sp. CA23 OX=2033032 GN=purU PE=3 SV=1	K01433					0.53	-0.915936	NO_SP	FALSE	FALSE
414	251	A0A291TW24|A0A291TW24	4.98	26	11	11	0.478261	2.00788	98000000	50300000	45500000	34300000	59454	Peptide chain release factor 3 OS=Aeromonas sp. CA23 OX=2033032 GN=prfC PE=3 SV=1	K02837					0.75	-0.415037	NO_SP	FALSE	FALSE
415	408	A0A291TW75|A0A291TW75	5.38	22	14	14	0.4	1.51189	52600000	43700000	35500000	31800000	92236	PapC/FimD family outer membrane usher protein OS=Aeromonas sp. CA23 OX=2033032 GN=CK910_02435 PE=3 SV=1	K12518					0.9	-0.152003	SP	FALSE	FALSE
416	167	A0A291U4D2|A0A291U4D2	4.5	44	12	12	0.545455	2.51119	69800000	133000000	40000000	68900000	44757	Cysteine desulfurase IscS OS=Aeromonas sp. CA23 OX=2033032 GN=iscS PE=3 SV=1	K04487					1.72	0.782409	NO_SP	FALSE	FALSE
419	518	A0A291TXU6|A0A291TXU6	8.14	23	11	11	0.578947	2.79269	78700000	43700000	60100000	35800000	61773	Membrane protein insertase YidC OS=Aeromonas sp. CA23 OX=2033032 GN=yidC PE=3 SV=1	K03217					0.59	-0.761213	NO_SP	FALSE	FALSE
420	410	A0A291U210|A0A291U210	3.91	17	12	12	0.363636	1.31013	54900000	32100000	31900000	21800000	75447	Cytochrome C OS=Aeromonas sp. CA23 OX=2033032 GN=CK910_13405 PE=4 SV=1						0.68	-0.556393	LIPO	FALSE	FALSE
421	655	A0A291TWV9|A0A291TWV9	0.15	19	8	8	0.285714	0.930698	35700000	26900000	29900000	23900000	76508	Membrane assembly protein AsmA OS=Aeromonas sp. CA23 OX=2033032 GN=CK910_03645 PE=4 SV=1						0.8	-0.321928	NO_SP	FALSE	FALSE
422	404	A0A291U5G7|A0A291U5G7	17	42	11	11	0.647059	3.43669	65000000	23500000	47100000	19100000	40505	Murein transglycosylase B OS=Aeromonas sp. CA23 OX=2033032 GN=CK910_20270 PE=4 SV=1	K08305				GH103.hmm	0.4	-1.32193	LIPO	FALSE	FALSE
422	404	A0A291U5G7|A0A291U5G7	17	42	11	11	0.647059	3.43669	65000000	23500000	47100000	19100000	40505	Murein transglycosylase B OS=Aeromonas sp. CA23 OX=2033032 GN=CK910_20270 PE=4 SV=1	K08305				GH23.hmm	0.4	-1.32193	LIPO	FALSE	FALSE
424	503	A0A291TX62|A0A291TX62	5.59	63	13	13	2.16667	145.78	1430000000	1140000000	746000000	593000000	11753	30S ribosomal protein S10 OS=Aeromonas sp. CA23 OX=2033032 GN=rpsJ PE=3 SV=1	K02946				GH85.hmm	0.8	-0.321928	NO_SP	FALSE	FALSE
427	471	A0A291U3A0|A0A291U3A0	10.73	49	15	15	0.681818	3.80638	47100000	317000000	31400000	194000000	41697	Citrate synthase OS=Aeromonas sp. CA23 OX=2033032 GN=CK910_16720 PE=3 SV=1	K01659					6.18	2.62761	NO_SP	FALSE	FALSE
428	1303	A0A291U1H8|A0A291U1H8	6.39	26	9	9	0.5	2.16228	21100000	6640000	11200000	5250000	47658	Flagellar hook protein FlgE OS=Aeromonas sp. CA23 OX=2033032 GN=CK910_12730 PE=3 SV=1	K02390					0.47	-1.08927	NO_SP	FALSE	FALSE
429	265	A0A291U6S1|A0A291U6S1	1.78	27	11	11	0.44	1.75423	36200000	36700000	28300000	30600000	60865	Peptide ABC transporter substrate-binding protein OS=Aeromonas sp. CA23 OX=2033032 GN=CK910_12680 PE=4 SV=1	K15580					1.08	0.111031	SP	FALSE	FALSE
430	292	A0A291TW41|A0A291TW41	34.41	59	12	12	0.857143	6.19686	200000000	23000000	164000000	20400000	27059	Arginine ABC transporter ATP-binding protein ArtP OS=Aeromonas sp. CA23 OX=2033032 GN=CK910_01730 PE=3 SV=1	K10000					0.12	-3.05889	NO_SP	CORRECT	CORRECT
431	358	A0A291TZ94|A0A291TZ94	10.6	64	14	14	2	99	340000000	230000000	222000000	147000000	15810	50S ribosomal protein L13 OS=Aeromonas sp. CA23 OX=2033032 GN=rplM PE=3 SV=1	K02871					0.66	-0.599462	NO_SP	FALSE	FALSE
433	374	A0A291TXM8|A0A291TXM8	1.43	74	11	11	1.22222	15.681	655000000	554000000	564000000	489000000	16292	Universal stress protein OS=Aeromonas sp. CA23 OX=2033032 GN=CK910_04410 PE=3 SV=1	K06149				GH31.hmm	0.87	-0.200913	NO_SP	FALSE	FALSE
434	434	A0A291TYQ2|A0A291TYQ2	4.48	74	15	15	1.5	30.6228	407000000	238000000	206000000	131000000	17435	30S ribosomal protein S7 OS=Aeromonas sp. CA23 OX=2033032 GN=rpsG PE=3 SV=1	K02992					0.63	-0.666576	NO_SP	FALSE	FALSE
435	667	A0A291TXF7|A0A291TXF7	7.04	39	7	7	0.875	6.49894	184000000	121000000	136000000	89700000	30079	Mechanosensitive ion channel protein OS=Aeromonas sp. CA23 OX=2033032 GN=CK910_04255 PE=3 SV=1	K03442					0.66	-0.599462	NO_SP	FALSE	FALSE
436	390	A0A291TZW1|A0A291TZW1	36.73	42	11	11	0.846154	6.01704	207000000	13800000	143000000	1280000	35606	Cytochrome C biogenesis protein CcsA OS=Aeromonas sp. CA23 OX=2033032 GN=CK910_10030 PE=4 SV=1	K00428					0.02	-5.64386	SP	CORRECT	CORRECT
439	506	A0A291TZ36|A0A291TZ36	8.72	16	8	6	0.266667	0.84785	12400000	7060000	9880000	5360000	68328	Methyl-accepting chemotaxis protein OS=Aeromonas sp. CA23 OX=2033032 GN=CK910_07425 PE=4 SV=1	K03406					0.54	-0.888969	NO_SP	FALSE	FALSE
440	592	A0A291U0P1|A0A291U0P1	6.73	11	7	7	0.155556	0.430723	6190000	9970000	5100000	7730000	98415	Translation initiation factor IF-2 OS=Aeromonas sp. CA23 OX=2033032 GN=infB PE=3 SV=1	K02519					1.52	0.604071	NO_SP	FALSE	FALSE
441	830	A0A291U382|A0A291U382	1.78	3	3	3	0.0365854	0.087891	4780000	2750000	4780000	2750000	181523	Glutamate dehydrogenase OS=Aeromonas sp. CA23 OX=2033032 GN=CK910_16605 PE=4 SV=1	K15371					0.58	-0.785875	NO_SP	FALSE	FALSE
443	481	A0A291U0X6|A0A291U0X6	6.93	29	9	9	0.6	2.98107	34200000	45000000	18500000	29700000	40330	Transporter OS=Aeromonas sp. CA23 OX=2033032 GN=CK910_12365 PE=4 SV=1					GT41.hmm	1.6	0.678072	SP	FALSE	FALSE
443	481	A0A291U0X6|A0A291U0X6	6.93	29	9	9	0.6	2.98107	34200000	45000000	18500000	29700000	40330	Transporter OS=Aeromonas sp. CA23 OX=2033032 GN=CK910_12365 PE=4 SV=1					GT41.hmm	1.6	0.678072	SP	FALSE	FALSE
444	254	A0A291U3R8|A0A291U3R8	1.33	23	12	12	0.363636	1.31013	48100000	33400000	34100000	19800000	75516	Methionine--tRNA ligase OS=Aeromonas sp. CA23 OX=2033032 GN=metG PE=3 SV=1	K01874					0.58	-0.785875	NO_SP	FALSE	FALSE
446	271	A0A291U5N0|A0A291U5N0	8.78	18	12	12	0.521739	2.3246	57000000	14200000	43500000	12200000	59387	Glutamate synthase OS=Aeromonas sp. CA23 OX=2033032 GN=CK910_20505 PE=4 SV=1						0.28	-1.8365	NO_SP	FALSE	FALSE
447	832	A0A291U4G7|A0A291U4G7	0.65	17	7	7	0.291667	0.957342	24700000	19500000	18800000	17500000	67518	Protein translocase subunit SecD OS=Aeromonas sp. CA23 OX=2033032 GN=secD PE=3 SV=1	K03072					0.93	-0.104697	NO_SP	FALSE	FALSE
448	619	A0A291U384|A0A291U384	0.77	51	8	8	1.33333	20.5443	520000000	570000000	299000000	311000000	11199	Integration host factor subunit alpha OS=Aeromonas sp. CA23 OX=2033032 GN=ihfA PE=3 SV=1	K04764					1.04	0.0565835	NO_SP	FALSE	FALSE
450	354	A0A291TVV7|A0A291TVV7	2.34	41	9	9	0.818182	5.57933	185000000	93200000	130000000	70000000	36341	LLM class flavin-dependent oxidoreductase OS=Aeromonas sp. CA23 OX=2033032 GN=CK910_00285 PE=4 SV=1						0.54	-0.888969	NO_SP	FALSE	FALSE
451	621	A0A291U4N9|A0A291U4N9	20.14	33	6	6	0.5	2.16228	368000000	129000000	321000000	113000000	25508	Negative modulator of initiation of replication OS=Aeromonas sp. CA23 OX=2033032 GN=seqA PE=3 SV=1	K03645					0.35	-1.51457	NO_SP	FALSE	FALSE
453	399	A0A291U147|A0A291U147	4.91	53	8	8	0.888889	6.74264	444000000	257000000	356000000	194000000	21181	Protein GrpE OS=Aeromonas sp. CA23 OX=2033032 GN=grpE PE=3 SV=1	K03687					0.54	-0.888969	NO_SP	FALSE	FALSE
454	391	A0A291U0T0|A0A291U0T0	18.65	39	12	12	0.8	5.30957	33100000	4940000	18600000	2660000	41222	Chaperone protein DnaJ OS=Aeromonas sp. CA23 OX=2033032 GN=dnaJ PE=3 SV=1	K03686					0.14	-2.8365	NO_SP	FALSE	FALSE
458	452	A0A291TW31|A0A291TW31	4.79	70	10	10	1.25	16.7828	166000000	267000000	114000000	186000000	17252	Thiol peroxidase OS=Aeromonas sp. CA23 OX=2033032 GN=tpx PE=3 SV=1	K11065					1.63	0.704872	NO_SP	FALSE	FALSE
459	490	A0A291U6Y5|A0A291U6Y5	10.98	56	9	9	1.125	12.3352	317000000	120000000	254000000	97300000	23189	Uncharacterized protein OS=Aeromonas sp. CA23 OX=2033032 GN=CK910_08810 PE=4 SV=1						0.38	-1.39593	SP	FALSE	FALSE
460	123	A0A291U338|A0A291U338	1.17	41	14	14	0.666667	3.64159	62200000	31500000	29300000	18900000	54462	Peptidase M17 OS=Aeromonas sp. CA23 OX=2033032 GN=CK910_16145 PE=3 SV=1	K01255					0.65	-0.621488	NO_SP	FALSE	FALSE
462	421	A0A291U1V4|A0A291U1V4	7.01	44	9	9	1	9	211000000	392000000	152000000	279000000	23975	DUF2057 domain-containing protein OS=Aeromonas sp. CA23 OX=2033032 GN=CK910_12995 PE=3 SV=1	K09909					1.83	0.871844	SP	FALSE	FALSE
463	551	A0A291TZ00|A0A291TZ00	1.3	63	13	13	1.18182	14.1991	152000000	155000000	84900000	88500000	20396	BON domain-containing protein OS=Aeromonas sp. CA23 OX=2033032 GN=CK910_07215 PE=4 SV=1						1.04	0.0565835	LIPO	FALSE	FALSE
465	462	A0A291U1B6|A0A291U1B6	4.47	35	7	7	0.7	4.01187	103000000	77200000	83000000	60200000	27209	Two-component system response regulator ArcA OS=Aeromonas sp. CA23 OX=2033032 GN=CK910_11900 PE=4 SV=1	K07773					0.73	-0.454032	NO_SP	FALSE	FALSE
466	522	A0A291U6K7|A0A291U6K7	6.14	21	11	11	0.314286	1.06199	83100000	52100000	65900000	43700000	72585	DNA ligase OS=Aeromonas sp. CA23 OX=2033032 GN=ligA PE=3 SV=1	K01972					0.66	-0.599462	NO_SP	FALSE	FALSE
467	520	A0A291U5V6|A0A291U5V6	4.79	48	9	9	0.642857	3.39397	284000000	239000000	238000000	204000000	28970	Uncharacterized protein OS=Aeromonas sp. CA23 OX=2033032 GN=CK910_21060 PE=3 SV=1	K04754					0.86	-0.217591	LIPO	FALSE	FALSE
468	2981	A0A291TYB7|A0A291TYB7	14.71	31	10	10	0.588235	2.87468	11800000	50400000	9870000	34300000	49692	Aspartate aminotransferase family protein OS=Aeromonas sp. CA23 OX=2033032 GN=CK910_05860 PE=3 SV=1	K12256					3.48	1.79909	NO_SP	FALSE	FALSE
469	178	A0A291U2G0|A0A291U2G0	10.68	26	13	13	0.433333	1.71227	46800000	6900000	21700000	4170000	62642	Asparagine synthase B OS=Aeromonas sp. CA23 OX=2033032 GN=asnB PE=3 SV=1	K01953					0.19	-2.39593	NO_SP	FALSE	FALSE
470	381	A0A291TWX1|A0A291TWX1	26.1	25	11	11	0.407407	1.5551	122000000	49200000	113000000	46500000	55178	Ribonuclease E/G OS=Aeromonas sp. CA23 OX=2033032 GN=CK910_03010 PE=4 SV=1	K08301					0.41	-1.2863	NO_SP	FALSE	CORRECT
473	412	A0A291U0V5|A0A291U0V5	31.47	43	14	14	1.16667	13.678	125000000	18100000	90500000	13600000	37418	GMP reductase OS=Aeromonas sp. CA23 OX=2033032 GN=guaC PE=3 SV=1	K00364					0.15	-2.73697	NO_SP	FALSE	CORRECT
474	634	A0A291U587|A0A291U587	2.33	28	12	12	1.5	30.6228	56700000	88600000	37400000	54900000	25299	Molybdate ABC transporter substrate-binding protein OS=Aeromonas sp. CA23 OX=2033032 GN=modA PE=3 SV=1	K02020					1.47	0.555816	SP	FALSE	FALSE
475	426	A0A291U2T9|A0A291U2T9	16.2	76	9	2	2.25	176.828	98300000	18300000	98300000	18300000	19029	Type VI secretion system tube protein Hcp OS=Aeromonas sp. CA23 OX=2033032 GN=CK910_14985 PE=4 SV=1	K11903					0.19	-2.39593	NO_SP	FALSE	FALSE
476	438	A0A291U4W3|A0A291U4W3	19.56	30	6	6	0.315789	1.06914	14600000	5240000	10200000	4600000	42928	Queuine tRNA-ribosyltransferase OS=Aeromonas sp. CA23 OX=2033032 GN=tgt PE=3 SV=1	K00773					0.45	-1.152	NO_SP	FALSE	FALSE
477	239	A0A291U3S1|A0A291U3S1	17.11	36	9	9	0.642857	3.39397	106000000	12300000	79800000	9750000	40328	Glycerol dehydrogenase OS=Aeromonas sp. CA23 OX=2033032 GN=CK910_15990 PE=3 SV=1	K00005					0.12	-3.05889	NO_SP	FALSE	FALSE
480	417	A0A291TYB0|A0A291TYB0	2.78	48	12	12	0.5	2.16228	82300000	37100000	62500000	32100000	45543	Arginine deiminase OS=Aeromonas sp. CA23 OX=2033032 GN=arcA PE=3 SV=1	K01478					0.51	-0.971431	NO_SP	FALSE	FALSE
481	396	A0A291U112|A0A291U112	17.74	77	15	15	1.25	16.7828	161000000	41000000	84900000	22500000	21366	Hemerythrin OS=Aeromonas sp. CA23 OX=2033032 GN=CK910_11345 PE=4 SV=1						0.27	-1.88897	NO_SP	FALSE	FALSE
482	453	A0A291U4R1|A0A291U4R1	25.25	52	10	10	0.833333	5.81292	269000000	82200000	204000000	62300000	33533	Oxidoreductase OS=Aeromonas sp. CA23 OX=2033032 GN=CK910_18895 PE=4 SV=1						0.31	-1.68966	NO_SP	FALSE	CORRECT
483	545	A0A291U095|A0A291U095	12.05	55	7	7	0.7	4.01187	137000000	78200000	113000000	62900000	15778	Transcription antitermination protein NusB OS=Aeromonas sp. CA23 OX=2033032 GN=nusB PE=3 SV=1	K03625					0.56	-0.836501	NO_SP	FALSE	FALSE
487	2328	A0A291U5E7|A0A291U5E7	3.34	76	9	9	1.8	62.0957	167000000	51700000	109000000	39400000	14359	Chemotaxis protein CheY OS=Aeromonas sp. CA23 OX=2033032 GN=CK910_21155 PE=4 SV=1	K03413				GT4.hmm	0.36	-1.47393	NO_SP	FALSE	FALSE
489	352	A0A291TZ20|A0A291TZ20	1.62	12	11	11	0.289474	0.947483	8230000	8200000	4540000	3910000	102213	Protein translocase subunit SecA OS=Aeromonas sp. CA23 OX=2033032 GN=secA PE=3 SV=1	K03070					0.86	-0.217591	NO_SP	FALSE	FALSE
490	785	A0A291U209|A0A291U209	5.08	12	5	5	0.2	0.584893	16900000	23500000	16000000	21300000	55607	Dipeptidase OS=Aeromonas sp. CA23 OX=2033032 GN=CK910_14215 PE=3 SV=1	K08659					1.33	0.411426	LIPO	FALSE	FALSE
493	580	A0A291U563|A0A291U563	11.15	43	8	8	0.666667	3.64159	52500000	156000000	43800000	121000000	21231	Ecotin OS=Aeromonas sp. CA23 OX=2033032 GN=CK910_19645 PE=3 SV=1	K08276					2.76	1.46467	SP	FALSE	FALSE
494	418	A0A291U734|A0A291U734	0.07	22	8	8	0.307692	1.03092	17000000	17000000	14900000	15300000	61053	Secretion protein OS=Aeromonas sp. CA23 OX=2033032 GN=CK910_12340 PE=4 SV=1						1.02	0.0285692	NO_SP	FALSE	FALSE
496	499	A0A291U695|A0A291U695	1.1	63	10	10	1	9	103000000	95900000	80600000	70800000	20686	Ribosome-recycling factor OS=Aeromonas sp. CA23 OX=2033032 GN=frr PE=3 SV=1	K02838					0.88	-0.184425	NO_SP	FALSE	FALSE
497	713	A0A291TZL2|A0A291TZL2	11.7	40	7	7	0.7	4.01187	58500000	295000000	38000000	175000000	19600	YtfJ family protein OS=Aeromonas sp. CA23 OX=2033032 GN=CK910_09280 PE=4 SV=1	K07109					4.62	2.20789	SP	FALSE	FALSE
498	944	A0A291U611|A0A291U611	5.39	39	5	5	0.714286	4.17947	228000000	160000000	185000000	132000000	20102	DsbE family thiol:disulfide interchange protein OS=Aeromonas sp. CA23 OX=2033032 GN=CK910_21075 PE=3 SV=1	K02199					0.72	-0.473931	NO_SP	FALSE	FALSE
499	981	A0A291U0A0|A0A291U0A0	1.58	13	5	5	0.142857	0.389495	5110000	7050000	4440000	5700000	77612	Nuclease OS=Aeromonas sp. CA23 OX=2033032 GN=CK910_09835 PE=4 SV=1	K07004					1.28	0.356144	SP	FALSE	FALSE
500	362	A0A291U073|A0A291U073	11.26	43	12	12	0.545455	2.51119	30200000	98600000	21500000	64100000	48444	Sulfurtransferase OS=Aeromonas sp. CA23 OX=2033032 GN=CK910_09650 PE=4 SV=1	K21028					2.98	1.57531	SP	FALSE	FALSE
501	574	A0A291U0D6|A0A291U0D6	10.49	30	9	9	1	9	725000000	362000000	650000000	329000000	22540	Nitroreductase OS=Aeromonas sp. CA23 OX=2033032 GN=CK910_10865 PE=4 SV=1	K07078					0.51	-0.971431	NO_SP	FALSE	FALSE
502	461	A0A291U2J5|A0A291U2J5	5.15	27	9	9	0.409091	1.56502	21800000	27200000	16600000	23800000	48719	UPF0229 protein CK910_15855 OS=Aeromonas sp. CA23 OX=2033032 GN=CK910_15855 PE=3 SV=1	K09786					1.43	0.516015	NO_SP	FALSE	FALSE
504	351	A0A291TXI7|A0A291TXI7	19.55	36	12	12	1	9	105000000	47900000	54500000	24300000	41325	Beta sliding clamp OS=Aeromonas sp. CA23 OX=2033032 GN=CK910_04675 PE=3 SV=1	K02338					0.45	-1.152	NO_SP	FALSE	FALSE
507	497	A0A291U7E1|A0A291U7E1	1.03	39	11	11	0.733333	4.4117	47700000	41100000	33400000	28600000	31893	Flagellar motor protein MotB OS=Aeromonas sp. CA23 OX=2033032 GN=CK910_18940 PE=3 SV=1	K02557					0.86	-0.217591	NO_SP	FALSE	FALSE
508	591	A0A291U391|A0A291U391	12.37	23	8	8	0.5	2.16228	107000000	47000000	82800000	37700000	33770	Uncharacterized protein OS=Aeromonas sp. CA23 OX=2033032 GN=CK910_14885 PE=4 SV=1						0.46	-1.12029	LIPO	FALSE	FALSE
509	270	A0A291TW51|A0A291TW51	0.89	39	9	9	0.473684	1.97635	91500000	60400000	75900000	44700000	35474	Transcriptional regulator Cbl OS=Aeromonas sp. CA23 OX=2033032 GN=cbl PE=3 SV=1	K13635					0.59	-0.761213	NO_SP	FALSE	FALSE
510	372	A0A291U459|A0A291U459	39.3	25	8	8	0.285714	0.930698	30700000	2310000	18600000	1340000	56176	Alkyl hydroperoxide reductase subunit F OS=Aeromonas sp. CA23 OX=2033032 GN=CK910_19210 PE=3 SV=1	K03387					0.07	-3.8365	NO_SP	CORRECT	CORRECT
511	368	A0A291U6P5|A0A291U6P5	2.27	58	8	8	0.888889	6.74264	479000000	385000000	340000000	258000000	26361	NADP-dependent 3-hydroxy acid dehydrogenase OS=Aeromonas sp. CA23 OX=2033032 GN=CK910_02535 PE=3 SV=1	K16066					0.76	-0.395929	NO_SP	FALSE	FALSE
512	415	A0A291U123|A0A291U123	4.45	72	10	10	1.66667	45.4159	652000000	470000000	462000000	337000000	18145	PTS glucose transporter subunit IIA OS=Aeromonas sp. CA23 OX=2033032 GN=CK910_11820 PE=4 SV=1	K02777					0.73	-0.454032	NO_SP	FALSE	FALSE
513	482	A0A291U371|A0A291U371	10.24	50	13	13	1.08333	11.1153	105000000	6330000	72400000	4050000	40707	Methionine gamma-lyase OS=Aeromonas sp. CA23 OX=2033032 GN=CK910_15580 PE=3 SV=1	K01761					0.06	-4.05889	NO_SP	FALSE	FALSE
514	367	A0A291TXU5|A0A291TXU5	4.7	38	9	9	0.818182	5.57933	81400000	57500000	59400000	37100000	35262	Glycine--tRNA ligase alpha subunit OS=Aeromonas sp. CA23 OX=2033032 GN=glyQ PE=3 SV=1	K01878					0.62	-0.68966	NO_SP	FALSE	FALSE
517	373	A0A291TYH7|A0A291TYH7	21.82	65	8	8	1.14286	12.895	318000000	52300000	289000000	49900000	22241	Dihydroxyacetone kinase subunit L OS=Aeromonas sp. CA23 OX=2033032 GN=dhaL PE=4 SV=1	K05879					0.17	-2.55639	NO_SP	FALSE	FALSE
518	690	A0A291TV43|A0A291TV43	10.27	75	10	10	1.66667	45.4159	2350000000	1480000000	1800000000	1090000000	9592	RNA-binding protein Hfq OS=Aeromonas sp. CA23 OX=2033032 GN=hfq PE=3 SV=1	K03666					0.6	-0.736966	NO_SP	FALSE	FALSE
519	205	A0A291U145|A0A291U145	0.42	46	13	12	0.866667	6.35642	174000000	123000000	136000000	93600000	41941	Aspartate aminotransferase OS=Aeromonas sp. CA23 OX=2033032 GN=CK910_11505 PE=4 SV=1	K14155					0.69	-0.535332	NO_SP	FALSE	FALSE
520	422	A0A291U0D4|A0A291U0D4	2.56	87	11	11	1.375	22.7137	327000000	226000000	197000000	149000000	15731	Universal stress protein OS=Aeromonas sp. CA23 OX=2033032 GN=CK910_09955 PE=3 SV=1						0.75	-0.415037	NO_SP	FALSE	FALSE
521	487	A0A291TWP1|A0A291TWP1	3.39	78	9	9	1.5	30.6228	57300000	65300000	44700000	53700000	13835	30S ribosomal protein S11 OS=Aeromonas sp. CA23 OX=2033032 GN=rpsK PE=3 SV=1	K02948					1.2	0.263034	NO_SP	FALSE	FALSE
522	603	A0A291U156|A0A291U156	1.49	64	6	6	1	9	191000000	155000000	146000000	137000000	17456	LPS-assembly lipoprotein LptE OS=Aeromonas sp. CA23 OX=2033032 GN=lptE PE=3 SV=1	K03643					0.94	-0.0892673	LIPO	FALSE	FALSE
523	842	A0A291TVG9|A0A291TVG9	29.21	29	6	6	0.545455	2.51119	73300000	3880000	63700000	666000	28496	Glutamine ABC transporter ATP-binding protein OS=Aeromonas sp. CA23 OX=2033032 GN=CK910_01175 PE=3 SV=1	K02028					0.02	-5.64386	NO_SP	FALSE	CORRECT
524	705	A0A291U1G0|A0A291U1G0	8.12	43	7	7	0.875	6.49894	169000000	85800000	144000000	75300000	32142	NAD kinase OS=Aeromonas sp. CA23 OX=2033032 GN=nadK PE=3 SV=1	K00858					0.52	-0.943416	NO_SP	FALSE	FALSE
527	894	A0A291TX37|A0A291TX37	3.41	22	8	8	0.470588	1.95521	24700000	28100000	18200000	21700000	43214	Heme biosynthesis protein HemY OS=Aeromonas sp. CA23 OX=2033032 GN=CK910_02705 PE=4 SV=1	K02498				GT41.hmm	1.19	0.250962	NO_SP	FALSE	FALSE
527	894	A0A291TX37|A0A291TX37	3.41	22	8	8	0.470588	1.95521	24700000	28100000	18200000	21700000	43214	Heme biosynthesis protein HemY OS=Aeromonas sp. CA23 OX=2033032 GN=CK910_02705 PE=4 SV=1	K02498				GT41.hmm	1.19	0.250962	NO_SP	FALSE	FALSE
529	425	A0A291TVP8|A0A291TVP8	6.36	20	9	8	0.428571	1.6827	22100000	14700000	14600000	9930000	45149	Chemotaxis protein OS=Aeromonas sp. CA23 OX=2033032 GN=CK910_01115 PE=4 SV=1	K03406					0.68	-0.556393	NO_SP	FALSE	FALSE
530	687	A0A291U6A5|A0A291U6A5	4.89	34	8	8	0.666667	3.64159	89100000	117000000	81400000	107000000	37027	OmpA-like domain-containing protein OS=Aeromonas sp. CA23 OX=2033032 GN=CK910_21915 PE=3 SV=1	K03286					1.31	0.389567	SP	FALSE	FALSE
531	397	A0A291TZG4|A0A291TZG4	6.41	36	9	9	0.642857	3.39397	74900000	122000000	41900000	66200000	36062	NADP-dependent oxidoreductase OS=Aeromonas sp. CA23 OX=2033032 GN=CK910_09015 PE=4 SV=1						1.58	0.659925	NO_SP	FALSE	FALSE
532	657	A0A291U694|A0A291U694	9.68	38	8	8	0.727273	4.3367	43100000	24600000	29600000	19800000	22714	High frequency lysogenization protein HflD homolog OS=Aeromonas sp. CA23 OX=2033032 GN=hflD PE=3 SV=1	K07153					0.67	-0.577767	NO_SP	FALSE	FALSE
533	1297	A0A291U1J4|A0A291U1J4	5.68	12	7	7	0.152174	0.419626	19300000	842000	13700000	682000	79565	Polyphosphate kinase OS=Aeromonas sp. CA23 OX=2033032 GN=ppk1 PE=3 SV=1	K00937					0.05	-4.32193	NO_SP	FALSE	FALSE
535	486	A0A291U4D9|A0A291U4D9	28.41	20	13	13	0.5	2.16228	34400000	848000	25900000	376000	64917	Hydrogenase 3 large subunit OS=Aeromonas sp. CA23 OX=2033032 GN=hycE PE=4 SV=1	K15830					0.02	-5.64386	NO_SP	FALSE	CORRECT
538	429	A0A291U395|A0A291U395	14.16	96	9	9	1.125	12.3352	214000000	62300000	157000000	40800000	12529	Phasin family protein OS=Aeromonas sp. CA23 OX=2033032 GN=CK910_15965 PE=4 SV=1						0.26	-1.94342	NO_SP	FALSE	FALSE
539	801	A0A291U856|A0A291U856	0.42	51	9	9	0.75	4.62341	13900000	12200000	9900000	5310000	22846	Outer-membrane lipoprotein carrier protein OS=Aeromonas sp. CA23 OX=2033032 GN=lolA PE=3 SV=1	K03634					0.54	-0.888969	SP	FALSE	FALSE
540	901	A0A291TYI2|A0A291TYI2	15.28	43	11	11	0.55	2.54813	6550000	47700000	5600000	40600000	35130	D-galactose-binding periplasmic protein OS=Aeromonas sp. CA23 OX=2033032 GN=CK910_06060 PE=3 SV=1	K10540					7.26	2.85997	SP	FALSE	FALSE
542	443	A0A291U3L1|A0A291U3L1	5.98	33	9	9	0.75	4.62341	96600000	145000000	83700000	122000000	44942	D-amino acid dehydrogenase OS=Aeromonas sp. CA23 OX=2033032 GN=dadA PE=3 SV=1	K00285					1.45	0.536053	NO_SP	FALSE	FALSE
543	473	A0A291TZH5|A0A291TZH5	20.96	42	9	9	0.692308	3.92388	121000000	55400000	108000000	48900000	31614	2OG-Fe(II) oxygenase OS=Aeromonas sp. CA23 OX=2033032 GN=CK910_09065 PE=3 SV=1						0.45	-1.152	NO_SP	FALSE	FALSE
544	585	A0A291TWY1|A0A291TWY1	5.91	35	7	7	0.777778	4.99484	170000000	109000000	138000000	87100000	23866	MSHA biogenesis protein MshB OS=Aeromonas sp. CA23 OX=2033032 GN=CK910_03065 PE=4 SV=1	K10925					0.63	-0.666576	PILIN	FALSE	FALSE
545	791	A0A291U3M2|A0A291U3M2	3.7	39	6	6	0.545455	2.51119	244000000	292000000	216000000	255000000	21547	MarR family transcriptional regulator OS=Aeromonas sp. CA23 OX=2033032 GN=CK910_17415 PE=4 SV=1						1.18	0.238787	NO_SP	FALSE	FALSE
547	532	A0A291U2S9|A0A291U2S9	4.6	65	10	10	1.11111	11.9155	35300000	25000000	24500000	19500000	16622	DUF4357 domain-containing protein OS=Aeromonas sp. CA23 OX=2033032 GN=CK910_14910 PE=4 SV=1						0.8	-0.321928	NO_SP	FALSE	FALSE
548	540	A0A291TV65|A0A291TV65	2.05	54	11	11	1.83333	67.1292	265000000	289000000	217000000	239000000	18578	DUF4136 domain-containing protein OS=Aeromonas sp. CA23 OX=2033032 GN=CK910_00045 PE=4 SV=1						1.1	0.137504	LIPO	FALSE	FALSE
550	536	A0A291U5V5|A0A291U5V5	18.23	68	7	7	1.16667	13.678	1410000000	204000000	1270000000	179000000	12744	Ribosomal subunit interface protein OS=Aeromonas sp. CA23 OX=2033032 GN=raiA PE=4 SV=1	K05809					0.14	-2.8365	NO_SP	FALSE	FALSE
551	533	A0A291U4N6|A0A291U4N6	6.25	82	8	8	1.33333	20.5443	864000000	1300000000	802000000	1210000000	10438	RNA-binding protein OS=Aeromonas sp. CA23 OX=2033032 GN=CK910_18900 PE=4 SV=1						1.51	0.594549	NO_SP	FALSE	FALSE
552	333	A0A291TX15|A0A291TX15	2.49	81	8	8	1.14286	12.895	102000000	48400000	56200000	29900000	22556	Glyoxalase OS=Aeromonas sp. CA23 OX=2033032 GN=CK910_04060 PE=3 SV=1						0.53	-0.915936	NO_SP	FALSE	FALSE
553	553	A0A291U3R3|A0A291U3R3	3.44	37	8	8	0.571429	2.72759	36800000	32900000	21000000	20100000	32024	2 5-diketo-D-gluconic acid reductase OS=Aeromonas sp. CA23 OX=2033032 GN=CK910_17680 PE=4 SV=1	K06221					0.95	-0.0740006	NO_SP	FALSE	FALSE
554	1108	A0A291U7D9|A0A291U7D9	3.44	18	6	6	0.375	1.37137	19400000	18000000	13100000	13300000	58360	Peptide ABC transporter substrate-binding protein SapA OS=Aeromonas sp. CA23 OX=2033032 GN=CK910_15245 PE=4 SV=1	K19226					1.01	0.0143553	LIPO	FALSE	FALSE
555	575	A0A291TVS9|A0A291TVS9	11.48	55	12	10	1.71429	50.7947	279000000	182000000	139000000	88400000	12553	Nitrogen regulatory protein P-II OS=Aeromonas sp. CA23 OX=2033032 GN=CK910_01530 PE=3 SV=1	K04751					0.63	-0.666576	NO_SP	FALSE	FALSE
556	607	A0A291TXN0|A0A291TXN0	9.52	44	6	6	0.461538	1.89427	166000000	80300000	158000000	77600000	24884	TetR family transcriptional regulator OS=Aeromonas sp. CA23 OX=2033032 GN=CK910_05335 PE=4 SV=1						0.49	-1.02915	NO_SP	FALSE	FALSE
557	594	A0A291TVQ3|A0A291TVQ3	1.28	60	9	9	1.5	30.6228	1660000000	1340000000	1290000000	1040000000	10269	Co-chaperonin GroES OS=Aeromonas sp. CA23 OX=2033032 GN=groES PE=3 SV=1	K04078					0.81	-0.304006	NO_SP	FALSE	FALSE
558	366	A0A291U2I8|A0A291U2I8	9.94	53	14	14	1.55556	34.9381	124000000	110000000	51500000	38500000	18770	Leucine-responsive transcriptional regulator Lrp OS=Aeromonas sp. CA23 OX=2033032 GN=CK910_15185 PE=4 SV=1	K03719					0.75	-0.415037	NO_SP	FALSE	FALSE
559	531	A0A291TYD2|A0A291TYD2	10.62	68	10	10	2	99	862000000	521000000	653000000	393000000	12383	50S ribosomal protein L7/L12 OS=Aeromonas sp. CA23 OX=2033032 GN=rplL PE=3 SV=1	K02935					0.6	-0.736966	NO_SP	FALSE	FALSE
560	782	A0A291U114|A0A291U114	43.42	82	8	7	1.33333	20.5443	177000000	2840000	156000000	2020000	14171	Autonomous glycyl radical cofactor GrcA OS=Aeromonas sp. CA23 OX=2033032 GN=CK910_11335 PE=4 SV=1	K06866					0.02	-5.64386	NO_SP	CORRECT	CORRECT
561	1034	A0A291U0R8|A0A291U0R8	26.13	11	7	7	0.155556	0.430723	12400000	4980000	10800000	4240000	96938	DNA topoisomerase 1 OS=Aeromonas sp. CA23 OX=2033032 GN=topA PE=3 SV=1	K03168					0.39	-1.35845	NO_SP	FALSE	CORRECT
562	931	A0A291TZD5|A0A291TZD5	11.09	8	6	4	0.24	0.737801	1580000	3020000	1550000	2920000	76241	Chemotaxis protein OS=Aeromonas sp. CA23 OX=2033032 GN=CK910_08965 PE=4 SV=1	K03406					1.88	0.910733	NO_SP	FALSE	FALSE
563	1395	A0A291U4H4|A0A291U4H4	6.21	9	4	2	0.210526	0.623777	1490000	2200000	1490000	2200000	58440	Chemotaxis protein OS=Aeromonas sp. CA23 OX=2033032 GN=CK910_18470 PE=4 SV=1	K03406					1.48	0.565597	NO_SP	FALSE	FALSE
567	577	A0A291U3C7|A0A291U3C7	18.11	29	7	7	0.388889	1.44844	52600000	24100000	47400000	23300000	41667	tRNA 2-selenouridine synthase OS=Aeromonas sp. CA23 OX=2033032 GN=selU PE=3 SV=1	K06917					0.49	-1.02915	NO_SP	FALSE	FALSE
568	436	A0A291TVJ1|A0A291TVJ1	9.9	28	10	10	0.625	3.21697	98200000	55400000	78600000	43900000	34863	Signal peptidase I OS=Aeromonas sp. CA23 OX=2033032 GN=lepB PE=3 SV=1	K03100					0.56	-0.836501	NO_SP	FALSE	FALSE
569	378	A0A291U3P5|A0A291U3P5	3.14	44	10	10	1	9	387000000	277000000	225000000	177000000	23531	Glutathione S-transferase OS=Aeromonas sp. CA23 OX=2033032 GN=CK910_16895 PE=3 SV=1	K00799					0.79	-0.340075	NO_SP	FALSE	FALSE
570	558	A0A291TWJ2|A0A291TWJ2	18.07	22	8	8	0.347826	1.22754	53800000	18100000	39600000	12600000	54346	Dipeptidase OS=Aeromonas sp. CA23 OX=2033032 GN=CK910_02530 PE=3 SV=1	K08659					0.32	-1.64386	SP	FALSE	FALSE
571	697	A0A291TX34|A0A291TX34	3.05	52	5	5	0.555556	2.59381	91100000	102000000	59600000	66300000	15545	Rhodanese-like domain-containing protein OS=Aeromonas sp. CA23 OX=2033032 GN=CK910_03590 PE=4 SV=1						1.11	0.15056	NO_SP	FALSE	FALSE
572	722	A0A291U6Z0|A0A291U6Z0	4.12	34	11	11	0.478261	2.00788	22400000	8860000	14200000	6640000	55432	Metal-dependent carboxypeptidase OS=Aeromonas sp. CA23 OX=2033032 GN=CK910_23305 PE=3 SV=1	K01299					0.47	-1.08927	NO_SP	FALSE	FALSE
573	382	A0A291U7I0|A0A291U7I0	0.46	39	11	11	0.647059	3.43669	60200000	25300000	32500000	16700000	38786	Alanine racemase OS=Aeromonas sp. CA23 OX=2033032 GN=alr PE=3 SV=1	K01775					0.51	-0.971431	NO_SP	FALSE	FALSE
574	627	A0A291U502|A0A291U502	3.92	17	9	9	0.321429	1.09618	23100000	31700000	17200000	23100000	65403	Aspartate--tRNA ligase OS=Aeromonas sp. CA23 OX=2033032 GN=aspS PE=3 SV=1	K01876					1.34	0.422233	NO_SP	FALSE	FALSE
575	209	A0A291U738|A0A291U738	7.88	38	11	11	0.733333	4.4117	124000000	50400000	80300000	34000000	43297	Bifunctional chorismate mutase/prephenate dehydratase OS=Aeromonas sp. CA23 OX=2033032 GN=pheA PE=4 SV=1	K14170					0.42	-1.25154	NO_SP	FALSE	FALSE
576	2906	A0A291TWR4|A0A291TWR4	18.95	12	6	6	0.2	0.584893	6020000	29500000	5860000	28600000	72315	TonB-dependent copper receptor OS=Aeromonas sp. CA23 OX=2033032 GN=CK910_02565 PE=3 SV=1	K02014					4.88	2.28688	SP	FALSE	FALSE
577	674	A0A291TXV2|A0A291TXV2	8.2	60	9	9	1	9	48800000	27600000	43600000	24000000	22751	Nucleoid occlusion factor SlmA OS=Aeromonas sp. CA23 OX=2033032 GN=slmA PE=3 SV=1	K05501					0.55	-0.862496	NO_SP	FALSE	FALSE
579	873	A0A291U4K8|A0A291U4K8	8.1	18	3	3	0.214286	0.637894	17300000	44800000	15200000	39400000	31892	3-hydroxyisobutyrate dehydrogenase OS=Aeromonas sp. CA23 OX=2033032 GN=mmsB PE=3 SV=1	K00020					2.59	1.37295	NO_SP	FALSE	FALSE
580	895	A0A291U295|A0A291U295	3.45	15	5	5	0.263158	0.832981	18200000	16700000	10600000	10400000	53054	Membrane fusion protein (MFP) family protein OS=Aeromonas sp. CA23 OX=2033032 GN=CK910_13710 PE=3 SV=1	K12542					0.98	-0.0291463	NO_SP	FALSE	FALSE
581	419	A0A291U7Y2|A0A291U7Y2	0.09	34	12	12	0.666667	3.64159	38400000	40000000	24800000	25000000	51613	Putative beta-barrel assembly-enhancing protease OS=Aeromonas sp. CA23 OX=2033032 GN=CK910_19555 PE=3 SV=1	K01423				GT41.hmm	1.01	0.0143553	NO_SP	FALSE	FALSE
582	341	A0A291U0I7|A0A291U0I7	7.13	20	10	10	0.769231	4.87802	79300000	57300000	70300000	50500000	41108	Peptide chain release factor 2 OS=Aeromonas sp. CA23 OX=2033032 GN=prfB PE=3 SV=1	K02836					0.72	-0.473931	NO_SP	FALSE	FALSE
583	564	A0A291TX28|A0A291TX28	0.69	22	6	6	0.428571	1.6827	38600000	27100000	24700000	21500000	33802	Methionyl-tRNA formyltransferase OS=Aeromonas sp. CA23 OX=2033032 GN=fmt PE=3 SV=1	K00604					0.87	-0.200913	NO_SP	FALSE	FALSE
584	939	A0A291U7F2|A0A291U7F2	0.33	43	11	10	0.55	2.54813	22200000	23500000	12600000	12500000	37816	Porin OmpA OS=Aeromonas sp. CA23 OX=2033032 GN=CK910_07800 PE=3 SV=1	K03286					0.99	-0.0144996	SP	FALSE	FALSE
585	800	A0A291U0Z8|A0A291U0Z8	0.95	80	10	10	1	9	184000000	163000000	140000000	142000000	22070	Outer-membrane lipoprotein LolB OS=Aeromonas sp. CA23 OX=2033032 GN=lolB PE=3 SV=1	K02494					1.02	0.0285692	LIPO	FALSE	FALSE
586	589	A0A291U4N7|A0A291U4N7	13.27	73	9	9	1.125	12.3352	113000000	25400000	104000000	23500000	22202	PilZ domain-containing protein OS=Aeromonas sp. CA23 OX=2033032 GN=CK910_17960 PE=4 SV=1						0.23	-2.12029	NO_SP	FALSE	FALSE
589	601	A0A291U4W1|A0A291U4W1	10.07	37	8	8	0.888889	6.74264	359000000	206000000	302000000	181000000	31109	Endo/exonuclease/phosphatase domain-containing protein OS=Aeromonas sp. CA23 OX=2033032 GN=CK910_20150 PE=4 SV=1						0.6	-0.736966	LIPO	FALSE	FALSE
590	423	A0A291U0Q1|A0A291U0Q1	20.48	39	11	11	1.375	22.7137	1380000000	485000000	1030000000	380000000	26933	Dipeptidase PepE OS=Aeromonas sp. CA23 OX=2033032 GN=CK910_10585 PE=3 SV=1	K05995					0.37	-1.4344	NO_SP	FALSE	FALSE
591	529	A0A291TY44|A0A291TY44	19	22	9	9	0.75	4.62341	35200000	3340000	21700000	2430000	24459	LPS biosynthesis glycosyltransferase OS=Aeromonas sp. CA23 OX=2033032 GN=CK910_05355 PE=4 SV=1	K07270				GT25.hmm	0.11	-3.18442	NO_SP	FALSE	FALSE
592	647	A0A291TXN2|A0A291TXN2	6.86	45	8	8	1.6	38.8107	90200000	76600000	79200000	65100000	17774	RNA-binding protein OS=Aeromonas sp. CA23 OX=2033032 GN=CK910_04310 PE=4 SV=1					GT83.hmm	0.82	-0.286304	NO_SP	FALSE	FALSE
593	491	A0A291U108|A0A291U108	7.81	42	7	7	0.4375	1.73842	24400000	8600000	17900000	6440000	32254	Pyrophosphate phospho-hydrolase OS=Aeromonas sp. CA23 OX=2033032 GN=CK910_12110 PE=4 SV=1	K15986					0.36	-1.47393	NO_SP	FALSE	FALSE
595	557	A0A291TYW1|A0A291TYW1	11.24	55	9	9	1	9	48900000	98700000	31500000	67400000	23205	Phospholipid-binding protein MlaC OS=Aeromonas sp. CA23 OX=2033032 GN=CK910_07040 PE=4 SV=1	K07323					2.14	1.09761	SP	FALSE	FALSE
596	663	A0A291TYX5|A0A291TYX5	0.88	79	7	7	1.4	24.1189	117000000	121000000	105000000	112000000	13381	RidA family protein OS=Aeromonas sp. CA23 OX=2033032 GN=CK910_06425 PE=3 SV=1	K09022					1.07	0.0976108	NO_SP	FALSE	FALSE
597	757	A0A291TV44|A0A291TV44	7.13	52	8	8	1.14286	12.895	138000000	103000000	108000000	79600000	11399	50S ribosomal protein L21 OS=Aeromonas sp. CA23 OX=2033032 GN=rplU PE=3 SV=1	K02888					0.74	-0.434403	NO_SP	FALSE	FALSE
598	752	A0A291TVE0|A0A291TVE0	20.99	32	6	6	0.5	2.16228	61200000	41000000	47600000	28200000	31480	Co-chaperone protein DjlA OS=Aeromonas sp. CA23 OX=2033032 GN=djlA PE=3 SV=1	K05801					0.59	-0.761213	NO_SP	FALSE	FALSE
600	233	A0A291TVQ7|A0A291TVQ7	1.07	18	10	10	0.333333	1.15443	44500000	24400000	32000000	20000000	74214	Bifunctional polymyxin resistance protein ArnA OS=Aeromonas sp. CA23 OX=2033032 GN=arnA PE=3 SV=1	K10011					0.63	-0.666576	NO_SP	FALSE	FALSE
601	611	A0A291U3R9|A0A291U3R9	7.11	60	11	11	1.57143	36.2759	419000000	308000000	358000000	267000000	10145	Cell division topological specificity factor OS=Aeromonas sp. CA23 OX=2033032 GN=minE PE=3 SV=1	K03608					0.74	-0.434403	NO_SP	FALSE	FALSE
602	966	A0A291U368|A0A291U368	1.06	11	4	4	0.097561	0.251875	51200000	13300000	50600000	12600000	73080	Short chain dehydrogenase OS=Aeromonas sp. CA23 OX=2033032 GN=CK910_16675 PE=4 SV=1						0.25	-2	NO_SP	FALSE	FALSE
603	560	A0A291TZU7|A0A291TZU7	4.5	12	7	7	0.170732	0.481603	7310000	10000000	5770000	7530000	73567	NADPH-dependent 2 4-dienoyl-CoA reductase OS=Aeromonas sp. CA23 OX=2033032 GN=fadH PE=3 SV=1	K00219					1.3	0.378512	NO_SP	FALSE	FALSE
604	666	A0A291TX96|A0A291TX96	2.98	33	6	6	0.461538	1.89427	25700000	35900000	21200000	28300000	26921	Two-component system response regulator OmpR OS=Aeromonas sp. CA23 OX=2033032 GN=CK910_03530 PE=4 SV=1	K07659					1.33	0.411426	NO_SP	FALSE	FALSE
605	2119	A0A291TVX8|A0A291TVX8	7.66	31	5	5	1.25	16.7828	69900000	41000000	31800000	19600000	9530	30S ribosomal protein S20 OS=Aeromonas sp. CA23 OX=2033032 GN=rpsT PE=3 SV=1	K02968					0.62	-0.68966	NO_SP	FALSE	FALSE
606	319	A0A291U4E0|A0A291U4E0	1.64	11	8	8	0.32	1.0893	10200000	6810000	7940000	5530000	70835	Uncharacterized protein OS=Aeromonas sp. CA23 OX=2033032 GN=CK910_18195 PE=4 SV=1						0.7	-0.514573	SP	FALSE	FALSE
608	814	A0A291U1H1|A0A291U1H1	11.36	11	5	5	0.16129	0.449741	7830000	4670000	6710000	4450000	113133	Efflux pump membrane transporter OS=Aeromonas sp. CA23 OX=2033032 GN=CK910_12245 PE=3 SV=1	K18138					0.66	-0.599462	NO_SP	FALSE	FALSE
609	437	A0A291U3B6|A0A291U3B6	9.21	44	8	8	0.615385	3.12463	17100000	52900000	10900000	31500000	22803	Type VI secretion system-associated protein TagO OS=Aeromonas sp. CA23 OX=2033032 GN=CK910_15070 PE=4 SV=1	K11909					2.88	1.52607	SP	FALSE	FALSE
610	622	A0A291U0B9|A0A291U0B9	13.09	20	5	5	0.5	2.16228	121000000	59200000	114000000	58200000	34798	Endolytic peptidoglycan transglycosylase RlpA OS=Aeromonas sp. CA23 OX=2033032 GN=rlpA PE=3 SV=1	K03642					0.51	-0.971431	LIPO	FALSE	FALSE
611	692	A0A291TVL6|A0A291TVL6	0.97	23	7	7	0.583333	2.83119	347000000	357000000	341000000	349000000	39070	Porin OS=Aeromonas sp. CA23 OX=2033032 GN=CK910_00705 PE=3 SV=1						1.03	0.0426443	SP	FALSE	FALSE
612	700	A0A291TXF9|A0A291TXF9	20.73	62	7	7	1.4	24.1189	194000000	138000000	169000000	126000000	12479	50S ribosomal protein L18 OS=Aeromonas sp. CA23 OX=2033032 GN=rplR PE=3 SV=1	K02881					0.74	-0.434403	NO_SP	FALSE	FALSE
613	833	A0A291TY15|A0A291TY15	0.13	32	5	5	0.833333	5.81292	71100000	58500000	56600000	48100000	19534	ATP-dependent protease subunit HslV OS=Aeromonas sp. CA23 OX=2033032 GN=hslV PE=3 SV=1	K01419					0.85	-0.234465	NO_SP	FALSE	FALSE
616	563	A0A291U3S5|A0A291U3S5	0.4	47	9	9	0.642857	3.39397	77900000	63600000	54700000	48300000	29283	Uncharacterized protein OS=Aeromonas sp. CA23 OX=2033032 GN=CK910_16695 PE=4 SV=1					GT41.hmm	0.88	-0.184425	NO_SP	FALSE	FALSE
617	817	A0A291U411|A0A291U411	17.22	23	6	6	0.4	1.51189	38800000	11800000	32800000	10500000	32106	Nucleotide-binding protein OS=Aeromonas sp. CA23 OX=2033032 GN=CK910_17405 PE=3 SV=1	K00243					0.32	-1.64386	NO_SP	FALSE	FALSE
618	1002	A0A291TY05|A0A291TY05	17.92	55	8	8	1.33333	20.5443	71700000	36200000	50800000	26300000	9721	Ubiquinone biosynthesis accessory factor UbiK OS=Aeromonas sp. CA23 OX=2033032 GN=ubiK PE=3 SV=1	K09806					0.52	-0.943416	NO_SP	FALSE	FALSE
619	485	A0A291U4P3|A0A291U4P3	1.59	22	7	7	0.5	2.16228	28400000	17600000	25800000	15300000	41871	ABC transporter ATP-binding protein OS=Aeromonas sp. CA23 OX=2033032 GN=CK910_19585 PE=4 SV=1	K10111					0.59	-0.761213	NO_SP	FALSE	FALSE
622	401	A0A291TZ04|A0A291TZ04	6.47	28	9	9	0.642857	3.39397	391000000	322000000	320000000	271000000	26004	TIGR00153 family protein OS=Aeromonas sp. CA23 OX=2033032 GN=CK910_07915 PE=3 SV=1	K07220					0.85	-0.234465	NO_SP	FALSE	FALSE
624	433	A0A291TW15|A0A291TW15	2.79	65	9	9	1.8	62.0957	236000000	193000000	150000000	119000000	16071	Pullulanase OS=Aeromonas sp. CA23 OX=2033032 GN=CK910_00625 PE=4 SV=1						0.79	-0.340075	LIPO	FALSE	FALSE
625	519	A0A291U125|A0A291U125	18.71	81	7	7	0.875	6.49894	98100000	264000000	76300000	202000000	16389	Usp domain-containing protein OS=Aeromonas sp. CA23 OX=2033032 GN=CK910_12105 PE=4 SV=1						2.65	1.40599	NO_SP	FALSE	FALSE
626	903	A0A291TZX2|A0A291TZX2	2.64	59	7	7	0.875	6.49894	112000000	77200000	92100000	66700000	17446	Uncharacterized protein OS=Aeromonas sp. CA23 OX=2033032 GN=CK910_09715 PE=4 SV=1						0.72	-0.473931	LIPO	FALSE	FALSE
627	525	A0A291TW70|A0A291TW70	1.17	67	9	9	0.9	6.94328	78900000	78200000	67500000	70500000	17594	Lrp/AsnC family transcriptional regulator OS=Aeromonas sp. CA23 OX=2033032 GN=CK910_02580 PE=4 SV=1						1.05	0.0703893	NO_SP	FALSE	FALSE
628	637	A0A291U5U9|A0A291U5U9	22.67	37	6	6	0.666667	3.64159	710000000	110000000	613000000	101000000	21607	Peptidyl-prolyl cis-trans isomerase OS=Aeromonas sp. CA23 OX=2033032 GN=CK910_22030 PE=3 SV=1	K03773					0.16	-2.64386	NO_SP	FALSE	FALSE
629	1096	A0A291U710|A0A291U710	11.47	31	7	7	0.4375	1.73842	27500000	95500000	26600000	89600000	44815	Cysteine desulfurase-like protein OS=Aeromonas sp. CA23 OX=2033032 GN=CK910_23410 PE=4 SV=1						3.37	1.75275	NO_SP	FALSE	FALSE
630	455	A0A291U640|A0A291U640	3.54	42	11	11	0.733333	4.4117	96500000	76300000	66800000	56900000	37756	FAD:protein FMN transferase OS=Aeromonas sp. CA23 OX=2033032 GN=CK910_22605 PE=3 SV=1	K03734					0.85	-0.234465	LIPO	FALSE	FALSE
631	465	A0A291TW68|A0A291TW68	7.58	63	11	11	1.83333	67.1292	168000000	109000000	105000000	65300000	13164	50S ribosomal protein L19 OS=Aeromonas sp. CA23 OX=2033032 GN=rplS PE=3 SV=1	K02884					0.62	-0.68966	NO_SP	FALSE	FALSE
632	475	A0A291U4S4|A0A291U4S4	23.22	26	8	8	0.333333	1.15443	45700000	4870000	34700000	4380000	45410	UDP-N-acetyl-D-mannosamine dehydrogenase OS=Aeromonas sp. CA23 OX=2033032 GN=CK910_19465 PE=3 SV=1	K02472					0.13	-2.94342	NO_SP	FALSE	CORRECT
633	702	A0A291U343|A0A291U343	7.51	85	6	6	1.5	30.6228	970000000	582000000	838000000	504000000	9840	GrxA family glutaredoxin OS=Aeromonas sp. CA23 OX=2033032 GN=CK910_14595 PE=4 SV=1	K03674					0.6	-0.736966	NO_SP	FALSE	FALSE
634	298	A0A291TX19|A0A291TX19	8.81	61	12	12	1	9	88700000	43100000	43000000	19900000	24240	Probable GTP-binding protein EngB OS=Aeromonas sp. CA23 OX=2033032 GN=engB PE=3 SV=1	K03978					0.46	-1.12029	NO_SP	FALSE	FALSE
637	676	A0A291U3C1|A0A291U3C1	6.08	49	9	9	1	9	38500000	44200000	24800000	28100000	24283	Uridine kinase OS=Aeromonas sp. CA23 OX=2033032 GN=udk PE=3 SV=1	K00876					1.13	0.176323	NO_SP	FALSE	FALSE
638	764	A0A291U1G6|A0A291U1G6	9.92	75	4	4	1	9	564000000	241000000	522000000	226000000	7498	Cold-shock protein OS=Aeromonas sp. CA23 OX=2033032 GN=CK910_12605 PE=4 SV=1	K03704					0.43	-1.21759	NO_SP	FALSE	FALSE
639	792	A0A291U1F1|A0A291U1F1	3.39	64	6	6	0.857143	6.19686	111000000	156000000	86000000	127000000	19293	SRPBCC domain-containing protein OS=Aeromonas sp. CA23 OX=2033032 GN=CK910_12065 PE=3 SV=1						1.48	0.565597	NO_SP	FALSE	FALSE
640	1155	A0A291TYN7|A0A291TYN7	0	12	4	2	0.166667	0.467799	1020000	190000	1020000	190000	58922	Methyl-accepting chemotaxis protein OS=Aeromonas sp. CA23 OX=2033032 GN=CK910_07420 PE=4 SV=1	K03406					0.19	-2.39593	NO_SP	FALSE	FALSE
641	744	A0A291TXX6|A0A291TXX6	3.68	16	5	3	0.217391	0.649648	1170000	1130000	1170000	1100000	62439	Methyl-accepting chemotaxis protein OS=Aeromonas sp. CA23 OX=2033032 GN=CK910_06075 PE=4 SV=1	K03406					0.95	-0.0740006	NO_SP	FALSE	FALSE
644	515	A0A291U4Z3|A0A291U4Z3	15.1	17	9	9	0.272727	0.873817	47500000	31400000	35400000	22100000	66103	Autotransporter assembly factor TamA OS=Aeromonas sp. CA23 OX=2033032 GN=CK910_20210 PE=3 SV=1	K07278					0.62	-0.68966	SP	FALSE	FALSE
645	762	A0A291TY90|A0A291TY90	2.86	31	6	6	0.75	4.62341	116000000	85100000	99600000	78300000	25378	Pseudaminic acid cytidylyltransferase OS=Aeromonas sp. CA23 OX=2033032 GN=pseF PE=4 SV=1	K15899					0.79	-0.340075	NO_SP	FALSE	FALSE
647	633	A0A291TW38|A0A291TW38	7.44	57	6	6	0.857143	6.19686	249000000	364000000	195000000	288000000	15806	Glycine zipper 2TM domain-containing protein OS=Aeromonas sp. CA23 OX=2033032 GN=CK910_02225 PE=4 SV=1	K06077					1.47	0.555816	LIPO	FALSE	FALSE
648	483	A0A291TXZ4|A0A291TXZ4	6.69	16	7	7	0.304348	1.01534	11400000	17300000	6550000	11300000	46959	Transcription termination factor Rho OS=Aeromonas sp. CA23 OX=2033032 GN=rho PE=3 SV=1	K03628					1.73	0.790772	NO_SP	FALSE	FALSE
649	1137	A0A291TY32|A0A291TY32	1.08	11	6	6	0.25	0.778279	11600000	7660000	8620000	6120000	77346	TonB-dependent siderophore receptor OS=Aeromonas sp. CA23 OX=2033032 GN=CK910_04745 PE=3 SV=1	K02014					0.71	-0.494109	SP	FALSE	FALSE
650	469	A0A291TWH3|A0A291TWH3	14.11	41	9	9	0.6	2.98107	121000000	71300000	105000000	67200000	33310	33 kDa chaperonin OS=Aeromonas sp. CA23 OX=2033032 GN=hslO PE=3 SV=1	K04083					0.64	-0.643856	NO_SP	FALSE	FALSE
651	1324	A0A291U2V0|A0A291U2V0	13.08	38	8	8	0.666667	3.64159	4660000	50100000	3380000	34200000	30007	Ribose ABC transporter substrate-binding protein RbsB OS=Aeromonas sp. CA23 OX=2033032 GN=CK910_16485 PE=4 SV=1	K10439					10.12	3.33914	SP	FALSE	FALSE
652	795	A0A291U547|A0A291U547	1.44	15	6	6	0.857143	6.19686	28000000	24400000	23600000	19900000	31647	Protease HtpX OS=Aeromonas sp. CA23 OX=2033032 GN=htpX PE=3 SV=1	K03799					0.84	-0.251539	NO_SP	FALSE	FALSE
653	773	A0A291U1S6|A0A291U1S6	11.02	32	10	10	0.666667	3.64159	9540000	27200000	2700000	11000000	36234	Uncharacterized protein OS=Aeromonas sp. CA23 OX=2033032 GN=CK910_12830 PE=4 SV=1	K09938					4.08	2.02857	SP	FALSE	FALSE
654	677	A0A291TWI3|A0A291TWI3	5.81	23	4	4	0.266667	0.84785	27200000	20400000	27200000	20300000	27846	General secretion pathway protein N OS=Aeromonas sp. CA23 OX=2033032 GN=CK910_02125 PE=3 SV=1	K02463					0.75	-0.415037	NO_SP	FALSE	FALSE
655	258	A0A291U6L4|A0A291U6L4	2.8	31	9	9	0.529412	2.38386	59500000	66800000	40000000	45200000	39586	Glycosyltransferase OS=Aeromonas sp. CA23 OX=2033032 GN=CK910_22240 PE=4 SV=1	K20534				GT2.hmm	1.13	0.176323	NO_SP	FALSE	FALSE
655	258	A0A291U6L4|A0A291U6L4	2.8	31	9	9	0.529412	2.38386	59500000	66800000	40000000	45200000	39586	Glycosyltransferase OS=Aeromonas sp. CA23 OX=2033032 GN=CK910_22240 PE=4 SV=1	K20534				GT81.hmm	1.13	0.176323	NO_SP	FALSE	FALSE
655	258	A0A291U6L4|A0A291U6L4	2.8	31	9	9	0.529412	2.38386	59500000	66800000	40000000	45200000	39586	Glycosyltransferase OS=Aeromonas sp. CA23 OX=2033032 GN=CK910_22240 PE=4 SV=1	K20534				GT45.hmm	1.13	0.176323	NO_SP	FALSE	FALSE
655	258	A0A291U6L4|A0A291U6L4	2.8	31	9	9	0.529412	2.38386	59500000	66800000	40000000	45200000	39586	Glycosyltransferase OS=Aeromonas sp. CA23 OX=2033032 GN=CK910_22240 PE=4 SV=1	K20534				GT45.hmm	1.13	0.176323	NO_SP	FALSE	FALSE
655	258	A0A291U6L4|A0A291U6L4	2.8	31	9	9	0.529412	2.38386	59500000	66800000	40000000	45200000	39586	Glycosyltransferase OS=Aeromonas sp. CA23 OX=2033032 GN=CK910_22240 PE=4 SV=1	K20534				GT27.hmm	1.13	0.176323	NO_SP	FALSE	FALSE
655	258	A0A291U6L4|A0A291U6L4	2.8	31	9	9	0.529412	2.38386	59500000	66800000	40000000	45200000	39586	Glycosyltransferase OS=Aeromonas sp. CA23 OX=2033032 GN=CK910_22240 PE=4 SV=1	K20534				GT21.hmm	1.13	0.176323	NO_SP	FALSE	FALSE
657	709	A0A291TZQ6|A0A291TZQ6	10.31	10	5	5	0.25	0.778279	8910000	3100000	7990000	2980000	50274	UDP-N-acetylmuramate--L-alanyl-gamma-D-glutamyl-meso-2 6-diaminoheptandioate ligase OS=Aeromonas sp. CA23 OX=2033032 GN=mpl PE=3 SV=1	K02558					0.37	-1.4344	NO_SP	FALSE	FALSE
658	492	A0A291U054|A0A291U054	1.6	25	7	7	0.388889	1.44844	20100000	9030000	10200000	8020000	35280	Chemotaxis protein CheV OS=Aeromonas sp. CA23 OX=2033032 GN=CK910_09595 PE=4 SV=1	K03415					0.79	-0.340075	NO_SP	FALSE	FALSE
660	734	A0A291U589|A0A291U589	6.9	66	7	7	1	9	35100000	16200000	17900000	10200000	22908	Ancillary SecYEG translocon subunit OS=Aeromonas sp. CA23 OX=2033032 GN=CK910_19060 PE=3 SV=1						0.57	-0.810966	NO_SP	FALSE	FALSE
661	456	A0A291TYP3|A0A291TYP3	21.4	39	9	9	0.75	4.62341	135000000	27200000	109000000	22600000	26870	Uncharacterized protein OS=Aeromonas sp. CA23 OX=2033032 GN=CK910_06420 PE=4 SV=1						0.21	-2.25154	NO_SP	FALSE	FALSE
662	496	A0A291TWR9|A0A291TWR9	14.94	72	7	7	1	9	1450000000	691000000	1360000000	642000000	14002	30S ribosomal protein S8 OS=Aeromonas sp. CA23 OX=2033032 GN=rpsH PE=3 SV=1	K02994					0.47	-1.08927	NO_SP	FALSE	FALSE
663	586	A0A291TWV1|A0A291TWV1	8.72	35	7	7	0.583333	2.83119	44800000	23400000	38200000	21400000	24149	DUF3313 domain-containing protein OS=Aeromonas sp. CA23 OX=2033032 GN=CK910_03895 PE=4 SV=1						0.56	-0.836501	LIPO	FALSE	FALSE
664	737	A0A291U3X4|A0A291U3X4	9.35	86	8	8	2	99	278000000	210000000	199000000	154000000	10696	50S ribosomal protein L25 OS=Aeromonas sp. CA23 OX=2033032 GN=rplY PE=3 SV=1	K02897					0.77	-0.37707	NO_SP	FALSE	FALSE
665	424	A0A291TVR7|A0A291TVR7	9.23	66	8	8	1	9	287000000	74200000	249000000	65100000	19993	Carbonate dehydratase OS=Aeromonas sp. CA23 OX=2033032 GN=CK910_01255 PE=4 SV=1						0.26	-1.94342	NO_SP	FALSE	FALSE
666	941	A0A291U7T1|A0A291U7T1	1.21	24	6	6	0.428571	1.6827	93500000	78100000	69300000	61400000	37201	Peptidase M35 OS=Aeromonas sp. CA23 OX=2033032 GN=CK910_13645 PE=4 SV=1	K08646					0.89	-0.168123	SP	FALSE	FALSE
667	1130	A0A291U7J2|A0A291U7J2	12.14	25	5	5	0.357143	1.27585	11500000	55800000	9430000	50700000	30214	Tungsten ABC transporter substrate-binding protein OS=Aeromonas sp. CA23 OX=2033032 GN=CK910_11660 PE=4 SV=1	K05772					5.38	2.42761	SP	FALSE	FALSE
668	2207	A0A291U5J9|A0A291U5J9	9.59	21	7	7	0.466667	1.92864	6080000	25100000	4610000	16100000	40805	N-acetylglucosamine-6-phosphate deacetylase OS=Aeromonas sp. CA23 OX=2033032 GN=CK910_20345 PE=3 SV=1	K01443				CE9.hmm	3.5	1.80735	NO_SP	FALSE	FALSE
669	4594	A0A291U6T4|A0A291U6T4	0	13	6	6	0.333333	1.15443	0	7880000	0	6020000	67855	Chitinase OS=Aeromonas sp. CA23 OX=2033032 GN=CK910_00070 PE=4 SV=1					GH19.hmm	64	6	SP	FALSE	FALSE
669	4594	A0A291U6T4|A0A291U6T4	0	13	6	6	0.333333	1.15443	0	7880000	0	6020000	67855	Chitinase OS=Aeromonas sp. CA23 OX=2033032 GN=CK910_00070 PE=4 SV=1					CBM5.hmm	64	6	SP	FALSE	FALSE
669	4594	A0A291U6T4|A0A291U6T4	0	13	6	6	0.333333	1.15443	0	7880000	0	6020000	67855	Chitinase OS=Aeromonas sp. CA23 OX=2033032 GN=CK910_00070 PE=4 SV=1					CBM5.hmm	64	6	SP	FALSE	FALSE
669	4594	A0A291U6T4|A0A291U6T4	0	13	6	6	0.333333	1.15443	0	7880000	0	6020000	67855	Chitinase OS=Aeromonas sp. CA23 OX=2033032 GN=CK910_00070 PE=4 SV=1					CBM12.hmm	64	6	SP	FALSE	FALSE
669	4594	A0A291U6T4|A0A291U6T4	0	13	6	6	0.333333	1.15443	0	7880000	0	6020000	67855	Chitinase OS=Aeromonas sp. CA23 OX=2033032 GN=CK910_00070 PE=4 SV=1					CBM12.hmm	64	6	SP	FALSE	FALSE
669	4594	A0A291U6T4|A0A291U6T4	0	13	6	6	0.333333	1.15443	0	7880000	0	6020000	67855	Chitinase OS=Aeromonas sp. CA23 OX=2033032 GN=CK910_00070 PE=4 SV=1					CBM12.hmm	64	6	SP	FALSE	FALSE
670	787	A0A291U014|A0A291U014	11.65	27	6	6	0.545455	2.51119	13600000	43400000	9030000	36400000	36558	Zinc-type alcohol dehydrogenase-like protein OS=Aeromonas sp. CA23 OX=2033032 GN=CK910_10280 PE=3 SV=1	K00344					4.03	2.01078	NO_SP	FALSE	FALSE
671	430	A0A291TX98|A0A291TX98	15.17	48	9	9	0.9	6.94328	140000000	30800000	100000000	23400000	18452	Uncharacterized protein OS=Aeromonas sp. CA23 OX=2033032 GN=CK910_03910 PE=4 SV=1	K09983					0.23	-2.12029	NO_SP	FALSE	FALSE
672	524	A0A291U4K3|A0A291U4K3	3.6	17	7	7	0.368421	1.33572	40100000	26200000	29400000	17200000	47715	Histidine--tRNA ligase OS=Aeromonas sp. CA23 OX=2033032 GN=hisS PE=3 SV=1	K01892					0.59	-0.761213	NO_SP	FALSE	FALSE
675	1401	A0A291U097|A0A291U097	0.52	28	8	8	0.571429	2.72759	20100000	15300000	14200000	11500000	48259	Alpha/beta hydrolase OS=Aeromonas sp. CA23 OX=2033032 GN=CK910_09670 PE=3 SV=1						0.81	-0.304006	NO_SP	FALSE	FALSE
677	2102	A0A291U5D0|A0A291U5D0	15.07	46	3	3	3	999	130000000	39000000	114000000	34900000	12583	Glutaredoxin OS=Aeromonas sp. CA23 OX=2033032 GN=grxD PE=3 SV=1	K07390					0.31	-1.68966	NO_SP	FALSE	FALSE
678	718	A0A291TW63|A0A291TW63	2.08	29	6	6	0.352941	1.25393	30500000	21800000	21400000	13600000	42186	NADH-dependent alcohol dehydrogenase OS=Aeromonas sp. CA23 OX=2033032 GN=CK910_02515 PE=3 SV=1	K08325					0.63	-0.666576	NO_SP	FALSE	FALSE
684	460	A0A291U3Z6|A0A291U3Z6	4.74	11	8	8	0.216216	0.645191	11000000	12400000	8200000	11200000	87696	Lon protease OS=Aeromonas sp. CA23 OX=2033032 GN=lon PE=2 SV=1	K01338					1.36	0.443607	NO_SP	FALSE	FALSE
685	879	A0A291TXB8|A0A291TXB8	2.93	3	3	3	0.0625	0.154782	1700000	2370000	1700000	2370000	101614	DNA polymerase I OS=Aeromonas sp. CA23 OX=2033032 GN=polA PE=3 SV=1	K02335					1.4	0.485427	NO_SP	FALSE	FALSE
687	1458	A0A291U0A4|A0A291U0A4	20.67	13	3	3	0.3	0.995262	97500000	57800000	72400000	42600000	27034	Flagellar motor protein PomA OS=Aeromonas sp. CA23 OX=2033032 GN=CK910_10460 PE=3 SV=1	K02556					0.59	-0.761213	NO_SP	FALSE	FALSE
688	386	A0A291TV27|A0A291TV27	3.09	11	6	6	0.214286	0.637894	15600000	8310000	11800000	6840000	62377	Energy-dependent translational throttle protein EttA OS=Aeromonas sp. CA23 OX=2033032 GN=ettA PE=3 SV=1	K06020					0.58	-0.785875	NO_SP	FALSE	FALSE
689	521	A0A291U4A1|A0A291U4A1	3.21	11	4	4	0.166667	0.467799	6550000	1730000	6350000	1510000	59263	ABC-F family ATPase OS=Aeromonas sp. CA23 OX=2033032 GN=CK910_17895 PE=4 SV=1						0.24	-2.05889	NO_SP	FALSE	FALSE
690	1025	A0A291TZ23|A0A291TZ23	0.24	8	2	2	0.142857	0.389495	1760000	2300000	1760000	2300000	37885	Protein RecA OS=Aeromonas sp. CA23 OX=2033032 GN=recA PE=3 SV=1	K03553					1.31	0.389567	NO_SP	FALSE	FALSE
691	695	A0A291TZK0|A0A291TZK0	11.14	43	6	6	0.666667	3.64159	645000000	397000000	638000000	394000000	19228	Sulfurtransferase OS=Aeromonas sp. CA23 OX=2033032 GN=CK910_09335 PE=4 SV=1						0.62	-0.68966	LIPO	FALSE	FALSE
692	1072	A0A291U5Y5|A0A291U5Y5	7.56	11	3	3	0.111111	0.29155	454000	1370000	454000	1370000	46678	Transcriptional regulator OS=Aeromonas sp. CA23 OX=2033032 GN=CK910_20350 PE=3 SV=1	K02565					3.01	1.58976	NO_SP	FALSE	FALSE
693	1248	A0A291TVP3|A0A291TVP3	14.18	55	7	7	0.875	6.49894	114000000	38000000	80500000	28100000	21004	Short chain dehydrogenase OS=Aeromonas sp. CA23 OX=2033032 GN=CK910_00480 PE=4 SV=1						0.35	-1.51457	NO_SP	FALSE	FALSE
694	476	A0A291TXV0|A0A291TXV0	9.17	29	6	6	0.333333	1.15443	34400000	15300000	29700000	13100000	33530	Probable chromosome-partitioning protein ParB OS=Aeromonas sp. CA23 OX=2033032 GN=CK910_04770 PE=3 SV=1	K03497					0.44	-1.18442	NO_SP	FALSE	FALSE
695	759	A0A291TXR8|A0A291TXR8	0.34	27	11	11	0.733333	4.4117	46700000	37200000	32600000	26900000	40418	Efflux transporter periplasmic adaptor subunit OS=Aeromonas sp. CA23 OX=2033032 GN=CK910_04560 PE=3 SV=1	K03585					0.82	-0.286304	NO_SP	FALSE	FALSE
696	648	A0A291TYA6|A0A291TYA6	6.09	25	6	6	0.857143	6.19686	360000000	105000000	311000000	89200000	24391	Phosphoenolpyruvate--glycerone phosphotransferase OS=Aeromonas sp. CA23 OX=2033032 GN=CK910_06520 PE=4 SV=1	K05881					0.29	-1.78588	NO_SP	FALSE	FALSE
697	1256	A0A291U0I1|A0A291U0I1	3.46	13	6	6	0.2	0.584893	7890000	2220000	3990000	2170000	78341	Pilus assembly protein PilQ OS=Aeromonas sp. CA23 OX=2033032 GN=CK910_11065 PE=3 SV=1	K02666					0.54	-0.888969	SP	FALSE	FALSE
698	405	A0A291TWU5|A0A291TWU5	5.18	30	8	8	0.5	2.16228	89500000	116000000	60800000	80100000	34270	GNAT family N-acetyltransferase OS=Aeromonas sp. CA23 OX=2033032 GN=CK910_03650 PE=4 SV=1						1.32	0.400538	NO_SP	FALSE	FALSE
700	770	A0A291TYM3|A0A291TYM3	1.87	55	7	7	0.875	6.49894	51400000	39400000	40000000	32600000	20859	Methylglyoxal synthase OS=Aeromonas sp. CA23 OX=2033032 GN=mgsA PE=3 SV=1	K01734					0.81	-0.304006	NO_SP	FALSE	FALSE
701	880	A0A291U013|A0A291U013	10.6	22	6	6	0.4	1.51189	34000000	70700000	29100000	58100000	50153	Succinyl-CoA synthetase subunit alpha OS=Aeromonas sp. CA23 OX=2033032 GN=CK910_10630 PE=4 SV=1						2	1	LIPO	FALSE	FALSE
703	282	A0A291U2X4|A0A291U2X4	13.69	28	9	9	0.375	1.37137	39700000	3840000	29800000	3170000	44998	Anaerobic glycerol-3-phosphate dehydrogenase subunit C OS=Aeromonas sp. CA23 OX=2033032 GN=glpC PE=4 SV=1	K00113					0.11	-3.18442	NO_SP	FALSE	FALSE
706	1074	A0A291U494|A0A291U494	11.77	25	5	5	0.357143	1.27585	26200000	91000000	24500000	83700000	38637	Alpha/beta hydrolase OS=Aeromonas sp. CA23 OX=2033032 GN=CK910_17685 PE=4 SV=1						3.42	1.774	SP	FALSE	FALSE
707	1379	A0A291U149|A0A291U149	3.09	57	8	8	1.14286	12.895	73900000	59800000	68200000	53400000	16784	Peptidyl-prolyl cis-trans isomerase OS=Aeromonas sp. CA23 OX=2033032 GN=CK910_11995 PE=3 SV=1						0.78	-0.358454	NO_SP	FALSE	FALSE
709	892	A0A291TVH3|A0A291TVH3	25.16	15	4	4	0.266667	0.84785	12500000	898000	10500000	898000	30061	Nucleoside triphosphate pyrophosphohydrolase OS=Aeromonas sp. CA23 OX=2033032 GN=CK910_00885 PE=4 SV=1	K04765					0.09	-3.47393	NO_SP	FALSE	CORRECT
710	905	A0A291U243|A0A291U243	18.81	16	6	6	0.461538	1.89427	88700000	8720000	81700000	8680000	38992	Uncharacterized protein OS=Aeromonas sp. CA23 OX=2033032 GN=CK910_15000 PE=4 SV=1						0.11	-3.18442	NO_SP	FALSE	FALSE
711	230	A0A291TYQ5|A0A291TYQ5	5.05	32	9	9	0.391304	1.46209	39800000	8620000	34000000	7530000	44444	UDP-N-acetylglucosamine 1-carboxyvinyltransferase OS=Aeromonas sp. CA23 OX=2033032 GN=murA PE=3 SV=1	K00790					0.22	-2.18442	NO_SP	FALSE	FALSE
712	638	A0A291U1X0|A0A291U1X0	28.33	46	9	9	0.818182	5.57933	98600000	25500000	65200000	19400000	27299	DedD protein OS=Aeromonas sp. CA23 OX=2033032 GN=CK910_13850 PE=4 SV=1	K03749					0.3	-1.73697	SP	FALSE	CORRECT
713	891	A0A291U3J0|A0A291U3J0	16.24	27	8	8	0.533333	2.41455	84200000	3810000	59900000	2590000	43701	Knotted carbamoyltransferase YgeW OS=Aeromonas sp. CA23 OX=2033032 GN=CK910_17235 PE=3 SV=1						0.04	-4.64386	NO_SP	FALSE	FALSE
714	357	A0A291TWC4|A0A291TWC4	12.79	30	8	8	0.615385	3.12463	68700000	5000000	50900000	3760000	39142	Sulfate ABC transporter ATP-binding protein OS=Aeromonas sp. CA23 OX=2033032 GN=CK910_01975 PE=4 SV=1	K02045					0.07	-3.8365	NO_SP	FALSE	FALSE
715	810	A0A291TWX2|A0A291TWX2	6.33	44	7	7	1.16667	13.678	83400000	47000000	64600000	38100000	13403	50S ribosomal protein L14 OS=Aeromonas sp. CA23 OX=2033032 GN=rplN PE=3 SV=1	K02874					0.59	-0.761213	NO_SP	FALSE	FALSE
716	869	A0A291U4Q8|A0A291U4Q8	9.69	18	8	8	0.666667	3.64159	282000000	138000000	187000000	89400000	49966	Glycerol-3-phosphate transporter OS=Aeromonas sp. CA23 OX=2033032 GN=glpT PE=3 SV=1	K02445					0.48	-1.05889	NO_SP	FALSE	FALSE
717	896	A0A291U420|A0A291U420	8.52	39	5	5	0.555556	2.59381	18500000	49100000	12600000	36900000	25376	Probable septum site-determining protein MinC OS=Aeromonas sp. CA23 OX=2033032 GN=minC PE=3 SV=1	K03610					2.92	1.54597	NO_SP	FALSE	FALSE
718	626	A0A291TXE5|A0A291TXE5	6.91	39	7	7	0.636364	3.32876	44000000	17200000	27200000	12600000	29775	Carbohydrate kinase OS=Aeromonas sp. CA23 OX=2033032 GN=CK910_03820 PE=4 SV=1						0.46	-1.12029	NO_SP	FALSE	FALSE
720	556	A0A291TWQ4|A0A291TWQ4	11.7	61	9	9	1.5	30.6228	174000000	118000000	120000000	86000000	22667	Superoxide dismutase OS=Aeromonas sp. CA23 OX=2033032 GN=CK910_02465 PE=3 SV=1	K04564					0.72	-0.473931	NO_SP	FALSE	FALSE
722	995	A0A291TVR0|A0A291TVR0	20.26	36	7	7	0.875	6.49894	61800000	14000000	50100000	11500000	21198	RimJ/RimL family protein N-acetyltransferase OS=Aeromonas sp. CA23 OX=2033032 GN=CK910_00725 PE=4 SV=1	K03817					0.23	-2.12029	NO_SP	FALSE	FALSE
723	1388	A0A291U4B1|A0A291U4B1	18.12	31	7	7	0.777778	4.99484	36900000	149000000	25000000	112000000	30772	Crotonase OS=Aeromonas sp. CA23 OX=2033032 GN=CK910_17820 PE=3 SV=1	K13766					4.46	2.15704	NO_SP	FALSE	FALSE
724	470	A0A291U5Q3|A0A291U5Q3	4.28	23	6	6	0.461538	1.89427	31300000	4080000	29100000	4000000	41758	Alcohol dehydrogenase OS=Aeromonas sp. CA23 OX=2033032 GN=CK910_20445 PE=4 SV=1	K00001					0.14	-2.8365	NO_SP	FALSE	FALSE
725	707	A0A291TYU9|A0A291TYU9	17.73	36	7	7	1.4	24.1189	160000000	20700000	130000000	17100000	21077	Single-stranded DNA-binding protein OS=Aeromonas sp. CA23 OX=2033032 GN=CK910_06920 PE=3 SV=1	K03111					0.13	-2.94342	NO_SP	FALSE	FALSE
726	604	A0A291U5T8|A0A291U5T8	0.23	31	4	4	0.4	1.51189	18800000	12600000	17200000	12200000	32908	Pyrimidine-specific ribonucleoside hydrolase RihA OS=Aeromonas sp. CA23 OX=2033032 GN=CK910_20660 PE=4 SV=1	K01250					0.71	-0.494109	NO_SP	FALSE	FALSE
727	953	A0A291TVQ2|A0A291TVQ2	16.41	27	6	6	0.75	4.62341	174000000	103000000	134000000	78900000	17152	Thioredoxin peroxidase OS=Aeromonas sp. CA23 OX=2033032 GN=CK910_00505 PE=4 SV=1	K03564					0.59	-0.761213	NO_SP	FALSE	FALSE
728	1088	A0A291U5K9|A0A291U5K9	0.52	54	4	4	1	9	79400000	81500000	67200000	74400000	10935	Uncharacterized protein OS=Aeromonas sp. CA23 OX=2033032 GN=CK910_20650 PE=4 SV=1						1.11	0.15056	NO_SP	FALSE	FALSE
730	1049	A0A291TZH4|A0A291TZH4	23.25	24	5	5	0.714286	4.17947	89300000	27100000	81000000	25100000	21676	DUF416 domain-containing protein OS=Aeromonas sp. CA23 OX=2033032 GN=CK910_08150 PE=4 SV=1	K09891					0.31	-1.68966	NO_SP	FALSE	CORRECT
731	1953	A0A291U593|A0A291U593	11.88	84	5	5	1.66667	45.4159	37100000	5380000	16400000	4910000	8350	UPF0352 protein CK910_19610 OS=Aeromonas sp. CA23 OX=2033032 GN=CK910_19610 PE=3 SV=1	K09904					0.3	-1.73697	NO_SP	FALSE	FALSE
732	656	A0A291TVZ6|A0A291TVZ6	21.74	51	10	10	1.42857	25.827	88700000	19800000	75700000	17600000	19158	YfbU family protein OS=Aeromonas sp. CA23 OX=2033032 GN=CK910_00510 PE=4 SV=1	K09161					0.23	-2.12029	NO_SP	FALSE	FALSE
733	793	A0A291U260|A0A291U260	11.83	38	8	8	0.727273	4.3367	20800000	12400000	13200000	11000000	34261	Uncharacterized protein OS=Aeromonas sp. CA23 OX=2033032 GN=CK910_13615 PE=4 SV=1						0.84	-0.251539	SP	FALSE	FALSE
734	723	A0A291TVS3|A0A291TVS3	23.49	7	5	4	0.263158	0.832981	13700000	3870000	12400000	3780000	70594	RNA polymerase sigma factor RpoD OS=Aeromonas sp. CA23 OX=2033032 GN=rpoD PE=3 SV=1	K03086					0.31	-1.68966	NO_SP	FALSE	CORRECT
735	340	A0A291U658|A0A291U658	10.49	14	7	7	0.194444	0.564748	23100000	1710000	15100000	1050000	83984	CbbBc protein OS=Aeromonas sp. CA23 OX=2033032 GN=CK910_21550 PE=3 SV=1						0.07	-3.8365	NO_SP	FALSE	FALSE
736	899	A0A291U152|A0A291U152	10.47	15	6	4	0.272727	0.873817	1610000	4570000	1240000	3940000	57286	Aerotaxis receptor Aer OS=Aeromonas sp. CA23 OX=2033032 GN=CK910_11550 PE=4 SV=1	K03776					3.19	1.67356	NO_SP	FALSE	FALSE
737	1039	A0A291U7Z2|A0A291U7Z2	2.03	6	7	7	0.318182	1.08057	32200000	29100000	28100000	26200000	147712	IPT/TIG domain/outer membrane autotransporter barrel domain-containing protein OS=Aeromonas sp. CA23 OX=2033032 GN=CK910_17610 PE=4 SV=1						0.93	-0.104697	NO_SP	FALSE	FALSE
738	402	A0A291U5L6|A0A291U5L6	2.77	22	9	9	0.310345	1.04336	25600000	17900000	18900000	13300000	55976	Glycerol-3-phosphate dehydrogenase OS=Aeromonas sp. CA23 OX=2033032 GN=CK910_19675 PE=3 SV=1	K00111					0.71	-0.494109	NO_SP	FALSE	FALSE
739	982	A0A291TXW4|A0A291TXW4	8.72	17	5	5	0.294118	0.968419	14300000	24100000	14100000	24000000	42871	2-amino-3-ketobutyrate coenzyme A ligase OS=Aeromonas sp. CA23 OX=2033032 GN=kbl PE=3 SV=1	K00639					1.7	0.765535	NO_SP	FALSE	FALSE
740	1080	A0A291TXE4|A0A291TXE4	22.07	14	5	5	0.192308	0.557068	29600000	3770000	23700000	3540000	69702	tRNA uridine 5-carboxymethylaminomethyl modification enzyme MnmG OS=Aeromonas sp. CA23 OX=2033032 GN=mnmG PE=3 SV=1	K03495					0.15	-2.73697	NO_SP	FALSE	FALSE
741	403	A0A291TZB2|A0A291TZB2	1.45	26	8	8	0.380952	1.4041	15100000	14500000	9630000	10900000	37822	L D-transpeptidase OS=Aeromonas sp. CA23 OX=2033032 GN=CK910_09150 PE=3 SV=1	K19235					1.13	0.176323	NO_SP	FALSE	FALSE
742	1524	A0A291TY60|A0A291TY60	0.67	15	9	9	0.209302	0.619207	6420000	662000	3450000	444000	90533	Trimethylamine-N-oxide reductase OS=Aeromonas sp. CA23 OX=2033032 GN=CK910_06320 PE=3 SV=1	K07812					0.13	-2.94342	TAT	FALSE	FALSE
744	831	A0A291U820|A0A291U820	7.61	22	8	8	0.4	1.51189	9540000	4160000	6760000	2750000	43368	FAD-dependent 2-octaprenylphenol hydroxylase OS=Aeromonas sp. CA23 OX=2033032 GN=CK910_19240 PE=3 SV=1	K18800					0.41	-1.2863	NO_SP	FALSE	FALSE
745	1230	A0A291U285|A0A291U285	15.79	21	5	5	0.5	2.16228	42800000	77300000	40600000	72700000	25408	Phage shock protein PspA OS=Aeromonas sp. CA23 OX=2033032 GN=pspA PE=3 SV=1	K03969					1.79	0.83996	NO_SP	FALSE	FALSE
748	669	A0A291TVA6|A0A291TVA6	6.1	18	6	6	0.333333	1.15443	25400000	18300000	22700000	16900000	62562	Neutral metalloproteinase OS=Aeromonas sp. CA23 OX=2033032 GN=CK910_00720 PE=3 SV=1	K08604					0.75	-0.415037	SP	FALSE	FALSE
749	458	A0A291U027|A0A291U027	19.33	60	9	9	1.125	12.3352	410000000	96100000	370000000	81500000	19623	Hypoxanthine phosphoribosyltransferase OS=Aeromonas sp. CA23 OX=2033032 GN=hpt PE=3 SV=1	K00760					0.22	-2.18442	NO_SP	FALSE	FALSE
750	568	A0A291U4P1|A0A291U4P1	4.93	20	6	6	0.272727	0.873817	10300000	3730000	9080000	3380000	42433	Nucleoid-associated protein YejK OS=Aeromonas sp. CA23 OX=2033032 GN=CK910_19605 PE=3 SV=1	K06899					0.37	-1.4344	NO_SP	FALSE	FALSE
751	689	A0A291TXA8|A0A291TXA8	2.79	47	10	10	0.769231	4.87802	43300000	21200000	20700000	12800000	31079	S-formylglutathione hydrolase OS=Aeromonas sp. CA23 OX=2033032 GN=fghA PE=3 SV=1	K01070				CE1.hmm	0.62	-0.68966	NO_SP	FALSE	FALSE
751	689	A0A291TXA8|A0A291TXA8	2.79	47	10	10	0.769231	4.87802	43300000	21200000	20700000	12800000	31079	S-formylglutathione hydrolase OS=Aeromonas sp. CA23 OX=2033032 GN=fghA PE=3 SV=1	K01070				CE10.hmm	0.62	-0.68966	NO_SP	FALSE	FALSE
751	689	A0A291TXA8|A0A291TXA8	2.79	47	10	10	0.769231	4.87802	43300000	21200000	20700000	12800000	31079	S-formylglutathione hydrolase OS=Aeromonas sp. CA23 OX=2033032 GN=fghA PE=3 SV=1	K01070				CE7.hmm	0.62	-0.68966	NO_SP	FALSE	FALSE
752	969	A0A291U7D0|A0A291U7D0	15.06	17	5	5	0.2	0.584893	8100000	109000	6150000	35300	67446	Peptidase M3 OS=Aeromonas sp. CA23 OX=2033032 GN=CK910_14790 PE=3 SV=1	K08602					0.02	-5.64386	NO_SP	FALSE	FALSE
753	1339	A0A291TX72|A0A291TX72	16.18	29	6	6	0.75	4.62341	89000000	30300000	64400000	24200000	20988	Fe/S biogenesis protein NfuA OS=Aeromonas sp. CA23 OX=2033032 GN=nfuA PE=3 SV=1	K07400					0.38	-1.39593	NO_SP	FALSE	FALSE
754	313	A0A291U5W1|A0A291U5W1	0.04	38	10	10	0.588235	2.87468	19400000	16400000	14000000	11900000	41406	tRNA-specific 2-thiouridylase MnmA OS=Aeromonas sp. CA23 OX=2033032 GN=mnmA PE=3 SV=1	K00566					0.85	-0.234465	NO_SP	FALSE	FALSE
756	661	A0A291U4A6|A0A291U4A6	2.06	13	4	4	0.25	0.778279	5000000	4360000	4890000	4100000	36055	HTH-type transcriptional regulator CysB OS=Aeromonas sp. CA23 OX=2033032 GN=CK910_18825 PE=3 SV=1	K13634					0.84	-0.251539	NO_SP	FALSE	FALSE
757	882	A0A291U665|A0A291U665	8.17	28	8	8	1.14286	12.895	53400000	36000000	34400000	22300000	20562	Uncharacterized protein OS=Aeromonas sp. CA23 OX=2033032 GN=CK910_22655 PE=4 SV=1	K07286					0.65	-0.621488	LIPO	FALSE	FALSE
758	1770	A0A291TWJ7|A0A291TWJ7	14.75	60	6	6	0.75	4.62341	64500000	9330000	55000000	7720000	16216	GNAT family N-acetyltransferase OS=Aeromonas sp. CA23 OX=2033032 GN=CK910_02790 PE=4 SV=1						0.14	-2.8365	NO_SP	FALSE	FALSE
759	501	A0A291TZE9|A0A291TZE9	5.11	23	7	7	0.368421	1.33572	72400000	39600000	68800000	37300000	43707	Phosphopentomutase OS=Aeromonas sp. CA23 OX=2033032 GN=deoB PE=3 SV=1	K01839					0.54	-0.888969	NO_SP	FALSE	FALSE
760	668	A0A291U3X3|A0A291U3X3	0.15	48	6	6	1.2	14.8489	37900000	19900000	27800000	16400000	20333	Uncharacterized protein OS=Aeromonas sp. CA23 OX=2033032 GN=CK910_18190 PE=4 SV=1						0.59	-0.761213	LIPO	FALSE	FALSE
761	777	A0A291U0Y0|A0A291U0Y0	10.07	32	6	6	0.461538	1.89427	28400000	63100000	25100000	51900000	29642	Succinyldiaminopimelate aminotransferase OS=Aeromonas sp. CA23 OX=2033032 GN=CK910_11130 PE=4 SV=1						2.06	1.04264	NO_SP	FALSE	FALSE
765	347	A0A291TWS6|A0A291TWS6	1.04	31	9	9	0.5625	2.65174	25300000	9880000	20800000	7300000	37029	Cell shape-determining protein MreB OS=Aeromonas sp. CA23 OX=2033032 GN=mreB PE=3 SV=1	K03569					0.35	-1.51457	NO_SP	FALSE	FALSE
766	1312	A0A291U6N5|A0A291U6N5	6.89	25	5	5	0.294118	0.968419	22600000	27400000	21900000	25400000	35917	Uncharacterized protein OS=Aeromonas sp. CA23 OX=2033032 GN=CK910_23520 PE=4 SV=1						1.16	0.214125	LIPO	FALSE	FALSE
767	336	A0A291U6V1|A0A291U6V1	0.83	60	9	9	0.9	6.94328	59400000	68800000	34800000	38300000	18192	UPF0234 protein CK910_22680 OS=Aeromonas sp. CA23 OX=2033032 GN=CK910_22680 PE=3 SV=1	K09767				CBM46.hmm	1.1	0.137504	NO_SP	FALSE	FALSE
767	336	A0A291U6V1|A0A291U6V1	0.83	60	9	9	0.9	6.94328	59400000	68800000	34800000	38300000	18192	UPF0234 protein CK910_22680 OS=Aeromonas sp. CA23 OX=2033032 GN=CK910_22680 PE=3 SV=1	K09767				CBM46.hmm	1.1	0.137504	NO_SP	FALSE	FALSE
768	370	A0A291TZA9|A0A291TZA9	18.58	26	5	5	0.5	2.16228	20700000	170000	17600000	110000	29205	UPF0246 protein CK910_08735 OS=Aeromonas sp. CA23 OX=2033032 GN=CK910_08735 PE=3 SV=1	K09861					0.02	-5.64386	NO_SP	FALSE	FALSE
770	890	A0A291U0D8|A0A291U0D8	19.36	61	4	4	1	9	130000000	72100000	127000000	68700000	14307	Uncharacterized protein OS=Aeromonas sp. CA23 OX=2033032 GN=CK910_10050 PE=4 SV=1						0.54	-0.888969	LIPO	FALSE	FALSE
771	375	A0A291U3N1|A0A291U3N1	6.88	37	8	8	0.666667	3.64159	47300000	87000000	37300000	68900000	32166	Ribokinase OS=Aeromonas sp. CA23 OX=2033032 GN=rbsK PE=3 SV=1	K00852					1.85	0.887525	NO_SP	FALSE	FALSE
772	598	A0A291TXQ7|A0A291TXQ7	21.91	53	8	8	0.666667	3.64159	86700000	19700000	63800000	14600000	16414	Heat-shock protein IbpA OS=Aeromonas sp. CA23 OX=2033032 GN=CK910_04630 PE=3 SV=1	K04080					0.23	-2.12029	NO_SP	FALSE	FALSE
773	775	A0A291U3B7|A0A291U3B7	6.49	16	6	6	0.333333	1.15443	11500000	30000000	7700000	25000000	38460	Iron-sulfur cluster carrier protein OS=Aeromonas sp. CA23 OX=2033032 GN=CK910_16885 PE=3 SV=1	K03593					3.24	1.69599	NO_SP	FALSE	FALSE
774	1447	A0A291U035|A0A291U035	33.63	59	7	7	0.875	6.49894	18800000	145000000	12300000	103000000	15709	DUF4426 domain-containing protein OS=Aeromonas sp. CA23 OX=2033032 GN=CK910_08770 PE=4 SV=1						8.36	3.0635	SP	CORRECT	CORRECT
776	605	A0A291TVK5|A0A291TVK5	22.15	18	5	5	0.277778	0.895736	25000000	2960000	22400000	2400000	38362	tRNA pseudouridine synthase D OS=Aeromonas sp. CA23 OX=2033032 GN=truD PE=3 SV=1	K06176					0.11	-3.18442	NO_SP	FALSE	FALSE
777	554	A0A291U6H9|A0A291U6H9	8.75	54	7	7	0.583333	2.83119	11400000	35500000	8600000	29300000	25270	Copper homeostasis protein CutC OS=Aeromonas sp. CA23 OX=2033032 GN=cutC PE=3 SV=1	K06201					3.4	1.76553	NO_SP	FALSE	FALSE
778	731	A0A291TZG6|A0A291TZG6	11.75	36	7	7	0.583333	2.83119	32100000	28700000	25300000	20500000	25953	Pyridoxal phosphate homeostasis protein OS=Aeromonas sp. CA23 OX=2033032 GN=CK910_08750 PE=3 SV=1	K06997					0.81	-0.304006	NO_SP	FALSE	FALSE
779	829	A0A291U1G1|A0A291U1G1	21.16	16	7	7	0.466667	1.92864	91700000	30300000	76400000	25300000	35863	ABC transporter permease OS=Aeromonas sp. CA23 OX=2033032 GN=CK910_12925 PE=3 SV=1	K02029					0.33	-1.59946	NO_SP	FALSE	FALSE
780	484	A0A291U5M1|A0A291U5M1	19.36	30	7	7	0.5	2.16228	22700000	7120000	17100000	6100000	27404	Protein phosphatase CheZ OS=Aeromonas sp. CA23 OX=2033032 GN=CK910_21150 PE=3 SV=1	K03414					0.36	-1.47393	NO_SP	FALSE	FALSE
781	680	A0A291TZW9|A0A291TZW9	9.12	39	5	5	0.625	3.21697	68800000	134000000	65500000	128000000	18037	Lrp/AsnC family transcriptional regulator OS=Aeromonas sp. CA23 OX=2033032 GN=CK910_09040 PE=4 SV=1	K03719					1.96	0.970854	NO_SP	FALSE	FALSE
782	643	A0A291U2U2|A0A291U2U2	1.48	48	10	10	2	99	114000000	79400000	72500000	58200000	13426	50S ribosomal protein L20 OS=Aeromonas sp. CA23 OX=2033032 GN=rplT PE=3 SV=1	K02887					0.8	-0.321928	NO_SP	FALSE	FALSE
783	613	A0A291U6P9|A0A291U6P9	18.45	93	8	8	1.14286	12.895	92200000	158000000	71300000	129000000	9647	Transcriptional regulator OS=Aeromonas sp. CA23 OX=2033032 GN=CK910_21895 PE=4 SV=1						1.81	0.85599	NO_SP	FALSE	FALSE
784	796	A0A291TY06|A0A291TY06	6.33	41	5	5	1.25	16.7828	464000000	298000000	439000000	281000000	17251	Regulator of ribonuclease activity A OS=Aeromonas sp. CA23 OX=2033032 GN=rraA PE=3 SV=1	K02553					0.64	-0.643856	NO_SP	FALSE	FALSE
785	699	A0A291TWE2|A0A291TWE2	2.15	57	7	7	1.16667	13.678	34100000	47000000	27400000	34900000	19668	Uncharacterized protein OS=Aeromonas sp. CA23 OX=2033032 GN=CK910_01405 PE=4 SV=1						1.28	0.356144	NO_SP	FALSE	FALSE
786	548	A0A291TX49|A0A291TX49	0.33	78	10	10	2	99	76300000	64300000	38000000	36800000	9441	30S ribosomal protein S17 OS=Aeromonas sp. CA23 OX=2033032 GN=rpsQ PE=3 SV=1	K02961					0.97	-0.0439433	NO_SP	FALSE	FALSE
787	606	A0A291TWJ1|A0A291TWJ1	11.95	12	7	7	0.241379	0.743329	57300000	61400000	40500000	47200000	72592	Type II secretion system protein GspD OS=Aeromonas sp. CA23 OX=2033032 GN=gspD PE=3 SV=1	K02453					1.17	0.226509	SP	FALSE	FALSE
788	774	A0A291U0H5|A0A291U0H5	14.54	8	4	4	0.142857	0.389495	29600000	15700000	29500000	15500000	66695	Protease 4 OS=Aeromonas sp. CA23 OX=2033032 GN=sppA PE=3 SV=1	K04773					0.52	-0.943416	NO_SP	FALSE	FALSE
789	1664	A0A291U4P5|A0A291U4P5	1.4	8	4	2	0.222222	0.668101	617000	1660000	617000	607000	58398	Methyl-accepting chemotaxis protein OS=Aeromonas sp. CA23 OX=2033032 GN=CK910_19290 PE=4 SV=1	K03406					0.98	-0.0291463	NO_SP	FALSE	FALSE
790	834	A0A291U6A3|A0A291U6A3	25.33	17	7	7	0.333333	1.15443	53700000	25800000	43100000	25100000	70685	Uncharacterized protein OS=Aeromonas sp. CA23 OX=2033032 GN=CK910_21040 PE=4 SV=1						0.58	-0.785875	SP	FALSE	CORRECT
792	3828	A0A291TZJ5|A0A291TZJ5	17.22	20	6	6	0.3	0.995262	2410000	96700000	1740000	77400000	41900	Spermidine/putrescine ABC transporter substrate-binding protein OS=Aeromonas sp. CA23 OX=2033032 GN=CK910_07695 PE=3 SV=1	K02055					44.34	5.47054	SP	FALSE	FALSE
795	1079	A0A291TYB3|A0A291TYB3	8.75	28	5	5	0.3125	1.05353	4450000	12900000	4110000	11000000	32269	Uncharacterized protein OS=Aeromonas sp. CA23 OX=2033032 GN=CK910_05845 PE=4 SV=1						2.69	1.42761	SP	FALSE	FALSE
796	872	A0A291TYK8|A0A291TYK8	20.74	18	4	4	0.333333	1.15443	19500000	5750000	17400000	5470000	34382	Ribosomal RNA small subunit methyltransferase H OS=Aeromonas sp. CA23 OX=2033032 GN=rsmH PE=3 SV=1	K03438					0.31	-1.68966	NO_SP	FALSE	FALSE
797	706	A0A291U1A2|A0A291U1A2	5.66	17	6	6	0.545455	2.51119	44100000	15100000	28600000	10400000	40378	Beta-ketoacyl-ACP synthase III OS=Aeromonas sp. CA23 OX=2033032 GN=CK910_11850 PE=4 SV=1	K16872					0.36	-1.47393	NO_SP	FALSE	FALSE
798	2106	A0A291U5X4|A0A291U5X4	4.86	50	5	5	0.714286	4.17947	102000000	80400000	76700000	54600000	13183	MliC domain-containing protein OS=Aeromonas sp. CA23 OX=2033032 GN=CK910_22165 PE=4 SV=1						0.71	-0.494109	LIPO	FALSE	FALSE
799	477	A0A291TV74|A0A291TV74	7.61	18	7	7	0.388889	1.44844	17300000	44700000	13000000	37800000	51031	Ribonuclease OS=Aeromonas sp. CA23 OX=2033032 GN=CK910_00610 PE=3 SV=1	K07175					2.91	1.54102	NO_SP	FALSE	FALSE
802	846	A0A291U5Z4|A0A291U5Z4	6.13	40	8	8	0.615385	3.12463	46500000	60900000	36500000	49800000	24040	TetR/AcrR family transcriptional regulator OS=Aeromonas sp. CA23 OX=2033032 GN=CK910_21385 PE=4 SV=1						1.36	0.443607	NO_SP	FALSE	FALSE
803	1041	A0A291U771|A0A291U771	7.15	37	7	7	0.583333	2.83119	88200000	48200000	72300000	40500000	24432	UPF0227 protein CK910_14800 OS=Aeromonas sp. CA23 OX=2033032 GN=CK910_14800 PE=3 SV=1	K07000					0.56	-0.836501	NO_SP	FALSE	FALSE
804	3300	A0A291TWD8|A0A291TWD8	15.2	19	7	7	0.5	2.16228	9400000	19500000	5760000	15000000	51363	N-acetylglucosamine-binding protein GbpA OS=Aeromonas sp. CA23 OX=2033032 GN=CK910_01960 PE=4 SV=1	K21712				CBM33.hmm	2.6	1.37851	SP	FALSE	FALSE
805	2710	A0A291U3Q5|A0A291U3Q5	15.29	24	7	7	0.368421	1.33572	3510000	26600000	2630000	18400000	42108	Acyl-CoA dehydrogenase OS=Aeromonas sp. CA23 OX=2033032 GN=CK910_17800 PE=3 SV=1						7	2.80735	NO_SP	FALSE	FALSE
806	2781	A0A291U0F3|A0A291U0F3	8.94	19	4	4	0.235294	0.719072	7510000	22700000	7150000	21500000	31031	MBL fold metallo-hydrolase OS=Aeromonas sp. CA23 OX=2033032 GN=CK910_11020 PE=4 SV=1						3.01	1.58976	SP	FALSE	FALSE
807	681	A0A291U724|A0A291U724	14.6	39	7	7	1.16667	13.678	912000000	369000000	742000000	305000000	19125	Uncharacterized protein OS=Aeromonas sp. CA23 OX=2033032 GN=CK910_12895 PE=4 SV=1						0.41	-1.2863	LIPO	FALSE	FALSE
808	710	A0A291TZ52|A0A291TZ52	7.95	68	7	7	1	9	86200000	41900000	59800000	31300000	16724	Chemotaxis protein CheX OS=Aeromonas sp. CA23 OX=2033032 GN=CK910_08705 PE=4 SV=1	K03409					0.52	-0.943416	NO_SP	FALSE	FALSE
809	922	A0A291TWI8|A0A291TWI8	16.18	59	6	6	2	99	1040000000	590000000	922000000	521000000	8958	30S ribosomal protein S16 OS=Aeromonas sp. CA23 OX=2033032 GN=rpsP PE=3 SV=1	K02959					0.57	-0.810966	NO_SP	FALSE	FALSE
810	636	A0A291TY22|A0A291TY22	9.11	22	7	7	0.368421	1.33572	12800000	3150000	8240000	2130000	37356	UDP-N-acetylglucosamine 4 6-dehydratase (Inverting) OS=Aeromonas sp. CA23 OX=2033032 GN=pseB PE=3 SV=1	K15894					0.26	-1.94342	NO_SP	FALSE	FALSE
811	701	A0A291TYA7|A0A291TYA7	14.15	13	4	4	0.137931	0.373824	9290000	2510000	8410000	2450000	69866	Maltodextrin glucosidase OS=Aeromonas sp. CA23 OX=2033032 GN=CK910_05810 PE=4 SV=1	K01187				GH13.hmm	0.29	-1.78588	NO_SP	FALSE	FALSE
811	701	A0A291TYA7|A0A291TYA7	14.15	13	4	4	0.137931	0.373824	9290000	2510000	8410000	2450000	69866	Maltodextrin glucosidase OS=Aeromonas sp. CA23 OX=2033032 GN=CK910_05810 PE=4 SV=1	K01187				CBM34.hmm	0.29	-1.78588	NO_SP	FALSE	FALSE
811	701	A0A291TYA7|A0A291TYA7	14.15	13	4	4	0.137931	0.373824	9290000	2510000	8410000	2450000	69866	Maltodextrin glucosidase OS=Aeromonas sp. CA23 OX=2033032 GN=CK910_05810 PE=4 SV=1	K01187				CBM20.hmm	0.29	-1.78588	NO_SP	FALSE	FALSE
812	978	A0A291TZU1|A0A291TZU1	4.98	77	6	6	1.5	30.6228	712000000	334000000	662000000	299000000	7638	Cold-shock protein OS=Aeromonas sp. CA23 OX=2033032 GN=CK910_09785 PE=4 SV=1	K03704					0.45	-1.152	NO_SP	FALSE	FALSE
813	703	A0A291U3H8|A0A291U3H8	1.19	44	6	6	0.6	2.98107	44300000	42900000	35300000	34700000	21301	dCTP deaminase OS=Aeromonas sp. CA23 OX=2033032 GN=dcd PE=3 SV=1	K01494					0.98	-0.0291463	NO_SP	FALSE	FALSE
814	1036	A0A291U6J6|A0A291U6J6	15.56	25	5	5	0.454545	1.84804	30100000	2020000	19300000	1530000	30856	Tim44 domain-containing protein OS=Aeromonas sp. CA23 OX=2033032 GN=CK910_23475 PE=4 SV=1					GT83.hmm	0.08	-3.64386	SP	FALSE	FALSE
815	2841	A0A291U406|A0A291U406	3.16	19	6	6	0.545455	2.51119	18700000	21600000	15700000	18400000	25388	Methanol dehydrogenase OS=Aeromonas sp. CA23 OX=2033032 GN=CK910_18920 PE=4 SV=1	K06872					1.17	0.226509	SP	FALSE	FALSE
816	779	A0A291TW57|A0A291TW57	4.6	34	8	8	0.571429	2.72759	26400000	43200000	22000000	33000000	27556	Ferredoxin--NADP reductase OS=Aeromonas sp. CA23 OX=2033032 GN=CK910_01455 PE=3 SV=1	K00528					1.5	0.584963	NO_SP	FALSE	FALSE
817	1321	A0A291U4D7|A0A291U4D7	8.87	10	5	5	0.217391	0.649648	35600000	27800000	33300000	24300000	70959	Alkaline phosphatase OS=Aeromonas sp. CA23 OX=2033032 GN=CK910_19615 PE=4 SV=1	K07014					0.73	-0.454032	NO_SP	FALSE	FALSE
818	1433	A0A291U294|A0A291U294	4.5	48	6	6	1	9	160000000	108000000	133000000	94600000	17534	OmpA-like domain-containing protein OS=Aeromonas sp. CA23 OX=2033032 GN=CK910_15310 PE=4 SV=1						0.71	-0.494109	LIPO	FALSE	FALSE
819	631	A0A291TZC2|A0A291TZC2	17.5	30	4	4	0.307692	1.03092	91400000	14200000	80900000	12900000	30077	Cell division protein ZapD OS=Aeromonas sp. CA23 OX=2033032 GN=zapD PE=3 SV=1	K18778					0.16	-2.64386	NO_SP	FALSE	FALSE
820	1821	A0A291TXX1|A0A291TXX1	10.02	23	6	6	0.375	1.37137	12300000	8480000	10900000	7820000	29611	Transcriptional regulator OS=Aeromonas sp. CA23 OX=2033032 GN=CK910_04855 PE=4 SV=1						0.72	-0.473931	NO_SP	FALSE	FALSE
821	998	A0A291U0C6|A0A291U0C6	10.24	42	4	4	0.444444	1.78256	101000000	30200000	89300000	29100000	18415	Uncharacterized protein OS=Aeromonas sp. CA23 OX=2033032 GN=CK910_10800 PE=4 SV=1						0.33	-1.59946	NO_SP	FALSE	FALSE
822	630	A0A291TVY8|A0A291TVY8	21.2	57	8	8	1.33333	20.5443	171000000	26100000	110000000	17600000	21144	Maltose acetyltransferase OS=Aeromonas sp. CA23 OX=2033032 GN=CK910_02005 PE=3 SV=1	K00661					0.16	-2.64386	NO_SP	FALSE	FALSE
823	635	A0A291U505|A0A291U505	1.38	34	6	6	0.5	2.16228	42700000	41200000	36400000	33700000	29991	Pyruvate formate-lyase-activating enzyme OS=Aeromonas sp. CA23 OX=2033032 GN=pflA PE=3 SV=1	K04069					0.93	-0.104697	NO_SP	FALSE	FALSE
824	919	A0A291U644|A0A291U644	1.56	50	6	6	2	99	576000000	528000000	532000000	474000000	8507	Major outer membrane lipoprotein Lpp OS=Aeromonas sp. CA23 OX=2033032 GN=lpp PE=3 SV=1	K06078					0.89	-0.168123	LIPO	FALSE	FALSE
825	457	A0A291U5E1|A0A291U5E1	2.46	27	6	6	0.5	2.16228	48900000	50900000	29500000	32900000	29414	Class II glutamine amidotransferase OS=Aeromonas sp. CA23 OX=2033032 GN=CK910_20100 PE=4 SV=1						1.11	0.15056	NO_SP	FALSE	FALSE
826	664	A0A291TX41|A0A291TX41	0.75	42	8	8	1.6	38.8107	38000000	36100000	25300000	26300000	15048	50S ribosomal protein L15 OS=Aeromonas sp. CA23 OX=2033032 GN=rplO PE=3 SV=1	K02876					1.04	0.0565835	NO_SP	FALSE	FALSE
827	736	A0A291TZU0|A0A291TZU0	28.31	35	7	7	1.4	24.1189	205000000	36300000	166000000	30300000	17461	Xanthine-guanine phosphoribosyltransferase OS=Aeromonas sp. CA23 OX=2033032 GN=gpt PE=3 SV=1	K00769					0.18	-2.47393	NO_SP	FALSE	CORRECT
828	534	A0A291U7P8|A0A291U7P8	1.22	46	9	9	1.5	30.6228	159000000	120000000	101000000	73400000	16826	4-hydroxy-4-methyl-2-oxoglutarate aldolase OS=Aeromonas sp. CA23 OX=2033032 GN=CK910_11910 PE=3 SV=1	K02553					0.72	-0.473931	NO_SP	FALSE	FALSE
829	650	A0A291TX70|A0A291TX70	16.49	44	9	9	1.5	30.6228	260000000	81100000	197000000	58100000	15490	Heat-shock protein OS=Aeromonas sp. CA23 OX=2033032 GN=CK910_04635 PE=3 SV=1	K04080					0.3	-1.73697	NO_SP	FALSE	FALSE
830	977	A0A291U1B1|A0A291U1B1	1.25	78	3	3	1	9	194000000	143000000	175000000	137000000	9014	TIGR02647 family protein OS=Aeromonas sp. CA23 OX=2033032 GN=CK910_12615 PE=4 SV=1						0.78	-0.358454	NO_SP	FALSE	FALSE
831	651	A0A291TZM5|A0A291TZM5	10.9	54	6	6	3	999	895000000	450000000	709000000	360000000	18979	Peptidoglycan-associated protein OS=Aeromonas sp. CA23 OX=2033032 GN=pal PE=3 SV=1	K03640					0.51	-0.971431	LIPO	FALSE	FALSE
832	886	A0A291U4Q0|A0A291U4Q0	9.4	30	4	4	0.363636	1.31013	13200000	27300000	10800000	27300000	32665	HTH-type transcriptional regulator HdfR OS=Aeromonas sp. CA23 OX=2033032 GN=CK910_19655 PE=3 SV=1	K23773					2.53	1.33914	NO_SP	FALSE	FALSE
833	929	A0A291U5I8|A0A291U5I8	10.1	52	7	7	0.875	6.49894	103000000	44300000	86700000	40800000	27335	Probable phosphatase CK910_21390 OS=Aeromonas sp. CA23 OX=2033032 GN=CK910_21390 PE=3 SV=1	K04477					0.47	-1.08927	NO_SP	FALSE	FALSE
834	733	A0A291U5H9|A0A291U5H9	28.15	76	10	10	2	99	140000000	10800000	99300000	7960000	8604	DUF465 domain-containing protein OS=Aeromonas sp. CA23 OX=2033032 GN=CK910_20485 PE=4 SV=1	K09794					0.08	-3.64386	NO_SP	FALSE	CORRECT
835	624	A0A291TXI9|A0A291TXI9	25.56	50	7	7	1.4	24.1189	246000000	12200000	173000000	8610000	17356	Protein-export protein SecB OS=Aeromonas sp. CA23 OX=2033032 GN=secB PE=3 SV=1	K03071					0.05	-4.32193	NO_SP	FALSE	CORRECT
836	1057	A0A291U3B2|A0A291U3B2	2.68	31	6	6	0.75	4.62341	14300000	12700000	10900000	9510000	18166	Cytochrome C oxidase Cbb3 OS=Aeromonas sp. CA23 OX=2033032 GN=CK910_16550 PE=4 SV=1	K09926					0.87	-0.200913	NO_SP	FALSE	FALSE
839	848	A0A291TZV2|A0A291TZV2	1.15	11	5	5	0.238095	0.730196	19500000	21600000	18100000	21300000	49003	MotA/TolQ/ExbB proton channel family protein OS=Aeromonas sp. CA23 OX=2033032 GN=CK910_09865 PE=3 SV=1	K03561					1.18	0.238787	SP	FALSE	FALSE
840	1124	A0A291TYC5|A0A291TYC5	14.4	35	6	6	0.5	2.16228	30100000	11700000	27500000	11100000	29396	XRE family transcriptional regulator OS=Aeromonas sp. CA23 OX=2033032 GN=CK910_06645 PE=4 SV=1						0.4	-1.32193	NO_SP	FALSE	FALSE
841	1094	A0A291U252|A0A291U252	0	3	2	2	0.0465116	0.113042	3900000	425000	2060000	352000	96898	Type VI secretion system ATPase TssH OS=Aeromonas sp. CA23 OX=2033032 GN=clpV PE=4 SV=1	K11907					0.17	-2.55639	NO_SP	FALSE	FALSE
842	1424	A0A291U1R8|A0A291U1R8	8.31	3	2	2	0.0740741	0.185971	7540000	3410000	7540000	3410000	70567	Flagellar hook-associated protein 1 OS=Aeromonas sp. CA23 OX=2033032 GN=CK910_12760 PE=3 SV=1	K02396					0.45	-1.152	NO_SP	FALSE	FALSE
843	439	A0A291TW80|A0A291TW80	0.5	7	5	5	0.142857	0.389495	8450000	3000000	7400000	2930000	89986	Bifunctional aspartokinase/homoserine dehydrogenase OS=Aeromonas sp. CA23 OX=2033032 GN=CK910_02070 PE=3 SV=1	K12525					0.4	-1.32193	NO_SP	FALSE	FALSE
844	413	A0A291U6J9|A0A291U6J9	1.29	20	6	6	0.26087	0.823348	24400000	7090000	18200000	5950000	42066	Ribosomal RNA large subunit methyltransferase M OS=Aeromonas sp. CA23 OX=2033032 GN=rlmM PE=3 SV=1	K06968					0.33	-1.59946	NO_SP	FALSE	FALSE
845	754	A0A291U0W9|A0A291U0W9	11.97	18	6	6	0.285714	0.930698	30100000	14100000	23300000	12000000	57281	Cell division protein DamX OS=Aeromonas sp. CA23 OX=2033032 GN=CK910_11080 PE=4 SV=1	K03112					0.51	-0.971431	NO_SP	FALSE	FALSE
846	1908	A0A291U610|A0A291U610	11.95	22	4	4	0.266667	0.84785	3290000	11700000	3270000	11300000	28112	Uncharacterized protein OS=Aeromonas sp. CA23 OX=2033032 GN=CK910_21255 PE=4 SV=1						3.46	1.79077	SP	FALSE	FALSE
847	927	A0A291TYJ6|A0A291TYJ6	1.73	20	5	5	0.384615	1.42446	13300000	13000000	9510000	10500000	26680	Lipopolysaccharide export system ATP-binding protein LptB OS=Aeromonas sp. CA23 OX=2033032 GN=lptB PE=3 SV=1	K06861					1.1	0.137504	NO_SP	FALSE	FALSE
848	406	A0A291U194|A0A291U194	5.5	27	8	8	0.666667	3.64159	132000000	45900000	123000000	43400000	33700	Recombination-associated protein RdgC OS=Aeromonas sp. CA23 OX=2033032 GN=rdgC PE=3 SV=1	K03554					0.35	-1.51457	NO_SP	FALSE	FALSE
849	767	A0A291TY97|A0A291TY97	4.7	13	4	4	0.210526	0.623777	11100000	15300000	10300000	14400000	41603	DUF5610 domain-containing protein OS=Aeromonas sp. CA23 OX=2033032 GN=CK910_05625 PE=4 SV=1						1.4	0.485427	NO_SP	FALSE	FALSE
850	783	A0A291TYZ0|A0A291TYZ0	10.76	20	6	6	0.333333	1.15443	23100000	40800000	22300000	35100000	40165	Outer membrane-stress sensor serine endopeptidase DegS OS=Aeromonas sp. CA23 OX=2033032 GN=degS PE=3 SV=1	K04691					1.57	0.650765	NO_SP	FALSE	FALSE
851	1214	A0A291U127|A0A291U127	6.44	45	4	4	0.666667	3.64159	205000000	108000000	181000000	94400000	14239	Large-conductance mechanosensitive channel OS=Aeromonas sp. CA23 OX=2033032 GN=mscL PE=3 SV=1	K03282					0.52	-0.943416	NO_SP	FALSE	FALSE
852	509	A0A291U253|A0A291U253	20.79	37	7	7	0.7	4.01187	98100000	14700000	90600000	12800000	22966	Fructose-6-phosphate aldolase OS=Aeromonas sp. CA23 OX=2033032 GN=fsa PE=4 SV=1	K08313					0.14	-2.8365	NO_SP	FALSE	FALSE
853	1170	A0A291TY73|A0A291TY73	5.39	9	2	2	0.125	0.333521	9610000	3410000	9610000	3410000	42689	tRNA/tmRNA (uracil-C(5))-methyltransferase OS=Aeromonas sp. CA23 OX=2033032 GN=trmA PE=3 SV=1	K00557					0.35	-1.51457	NO_SP	FALSE	FALSE
854	538	A0A291TYR4|A0A291TYR4	0.01	15	6	6	0.26087	0.823348	20600000	4790000	16100000	3630000	53095	UDP-N-acetylmuramoyl-L-alanyl-D-glutamate--2 6-diaminopimelate ligase OS=Aeromonas sp. CA23 OX=2033032 GN=murE PE=3 SV=1	K01928					0.22	-2.18442	NO_SP	FALSE	FALSE
855	972	A0A291TX91|A0A291TX91	2.68	20	5	5	0.384615	1.42446	221000000	237000000	218000000	236000000	36648	Transcriptional regulator OS=Aeromonas sp. CA23 OX=2033032 GN=CK910_03610 PE=4 SV=1	K06145					1.08	0.111031	NO_SP	FALSE	FALSE
856	973	A0A291U2A4|A0A291U2A4	8.31	39	6	6	0.857143	6.19686	40800000	94300000	37100000	84000000	16093	Uncharacterized protein OS=Aeromonas sp. CA23 OX=2033032 GN=CK910_13775 PE=4 SV=1						2.26	1.17632	SP	FALSE	FALSE
857	659	A0A291U0J7|A0A291U0J7	13.84	61	7	7	0.7	4.01187	18800000	34600000	13700000	30000000	20124	Putative NAD(P)H nitroreductase OS=Aeromonas sp. CA23 OX=2033032 GN=CK910_10260 PE=3 SV=1						2.18	1.12433	NO_SP	FALSE	FALSE
858	696	A0A291U0W0|A0A291U0W0	20.83	34	7	7	0.636364	3.32876	14800000	5100000	9750000	4260000	26662	Ribosomal RNA small subunit methyltransferase E OS=Aeromonas sp. CA23 OX=2033032 GN=CK910_11415 PE=3 SV=1	K09761					0.44	-1.18442	NO_SP	FALSE	FALSE
859	719	A0A291TZ98|A0A291TZ98	2.03	15	5	5	0.5	2.16228	8570000	11400000	7380000	10000000	33160	High-affinity zinc uptake system protein ZnuA OS=Aeromonas sp. CA23 OX=2033032 GN=CK910_08120 PE=3 SV=1	K09815					1.36	0.443607	SP	FALSE	FALSE
861	747	A0A291U6I0|A0A291U6I0	6.14	29	6	6	0.6	2.98107	36700000	25100000	31600000	19400000	29108	Methionine aminopeptidase OS=Aeromonas sp. CA23 OX=2033032 GN=map PE=3 SV=1	K01265					0.61	-0.713119	NO_SP	FALSE	FALSE
862	1042	A0A291U5E9|A0A291U5E9	8.09	25	6	6	0.461538	1.89427	15100000	21300000	12900000	19600000	23588	Two-component system response regulator NarL OS=Aeromonas sp. CA23 OX=2033032 GN=CK910_20070 PE=4 SV=1	K07685					1.51	0.594549	NO_SP	FALSE	FALSE
863	1813	A0A291U4Q9|A0A291U4Q9	19.07	16	4	4	0.266667	0.84785	21300000	8550000	21000000	8410000	35498	Alpha-L-glutamate ligase-like protein OS=Aeromonas sp. CA23 OX=2033032 GN=CK910_20400 PE=4 SV=1						0.4	-1.32193	NO_SP	FALSE	FALSE
864	750	A0A291U0V6|A0A291U0V6	27.75	74	6	6	1.2	14.8489	284000000	53000000	193000000	38300000	9094	HPr family phosphocarrier protein OS=Aeromonas sp. CA23 OX=2033032 GN=CK910_11830 PE=4 SV=1	K02784					0.2	-2.32193	NO_SP	FALSE	CORRECT
865	763	A0A291U5N7|A0A291U5N7	13.47	29	6	6	0.75	4.62341	81600000	40200000	68200000	33000000	22055	Uncharacterized protein OS=Aeromonas sp. CA23 OX=2033032 GN=CK910_20645 PE=4 SV=1						0.48	-1.05889	NO_SP	FALSE	FALSE
867	751	A0A291U1W5|A0A291U1W5	5.76	23	4	4	0.333333	1.15443	16600000	27500000	16000000	26500000	23984	Two-component system response regulator UvrY OS=Aeromonas sp. CA23 OX=2033032 GN=CK910_13060 PE=4 SV=1	K07689					1.66	0.731183	NO_SP	FALSE	FALSE
868	629	A0A291TW86|A0A291TW86	15.82	58	9	7	1.28571	18.307	98300000	12100000	79400000	9860000	12258	Transcriptional regulator OS=Aeromonas sp. CA23 OX=2033032 GN=CK910_01760 PE=3 SV=1	K04752					0.12	-3.05889	NO_SP	FALSE	FALSE
869	679	A0A291U4U1|A0A291U4U1	2.63	27	7	7	0.368421	1.33572	13300000	10900000	11200000	9820000	39769	Isoaspartyl dipeptidase OS=Aeromonas sp. CA23 OX=2033032 GN=CK910_19525 PE=3 SV=1	K01305				CE9.hmm	0.88	-0.184425	NO_SP	FALSE	FALSE
869	679	A0A291U4U1|A0A291U4U1	2.63	27	7	7	0.368421	1.33572	13300000	10900000	11200000	9820000	39769	Isoaspartyl dipeptidase OS=Aeromonas sp. CA23 OX=2033032 GN=CK910_19525 PE=3 SV=1	K01305				CE9.hmm	0.88	-0.184425	NO_SP	FALSE	FALSE
870	930	A0A291TXZ5|A0A291TXZ5	14.71	15	4	4	0.2	0.584893	2180000	38800	2010000	38800	47502	CoA-disulfide reductase OS=Aeromonas sp. CA23 OX=2033032 GN=CK910_06190 PE=4 SV=1						0.02	-5.64386	NO_SP	FALSE	FALSE
871	877	A0A291TZ10|A0A291TZ10	1.03	13	3	3	0.176471	0.501311	10100000	11700000	9970000	10900000	41434	Cell division protein ZapE OS=Aeromonas sp. CA23 OX=2033032 GN=zapE PE=3 SV=1	K06916					1.1	0.137504	NO_SP	FALSE	FALSE
872	1231	A0A291U3D3|A0A291U3D3	13.72	33	4	4	0.571429	2.72759	71600000	20800000	68000000	19900000	12013	Nucleoid-associated protein CK910_16985 OS=Aeromonas sp. CA23 OX=2033032 GN=CK910_16985 PE=3 SV=1	K09747					0.29	-1.78588	NO_SP	FALSE	FALSE
873	612	A0A291U4X2|A0A291U4X2	7.9	31	6	6	0.428571	1.6827	49800000	28800000	37400000	21700000	28162	DeoR/GlpR family transcriptional regulator OS=Aeromonas sp. CA23 OX=2033032 GN=CK910_19685 PE=4 SV=1	K02444					0.58	-0.785875	NO_SP	FALSE	FALSE
874	644	A0A291TY89|A0A291TY89	13.03	97	7	7	1.75	55.2341	236000000	121000000	169000000	87500000	7729	50S ribosomal protein L31 OS=Aeromonas sp. CA23 OX=2033032 GN=rpmE PE=3 SV=1	K02909					0.52	-0.943416	NO_SP	FALSE	FALSE
877	816	A0A291U144|A0A291U144	0.55	38	6	6	1.5	30.6228	88300000	66500000	35500000	42700000	15420	Azurin OS=Aeromonas sp. CA23 OX=2033032 GN=azu PE=4 SV=1						1.2	0.263034	SP	FALSE	FALSE
878	388	A0A291U5F3|A0A291U5F3	28.09	38	8	8	0.666667	3.64159	156000000	34600000	92100000	13400000	31001	Patatin OS=Aeromonas sp. CA23 OX=2033032 GN=CK910_21885 PE=4 SV=1	K07001					0.15	-2.73697	NO_SP	FALSE	CORRECT
879	804	A0A291TWM3|A0A291TWM3	28.7	73	5	5	1.66667	45.4159	595000000	182000000	521000000	159000000	7194	50S ribosomal protein L29 OS=Aeromonas sp. CA23 OX=2033032 GN=rpmC PE=3 SV=1	K02904					0.3	-1.73697	NO_SP	FALSE	CORRECT
880	983	A0A291U0B4|A0A291U0B4	1.88	24	5	5	0.833333	5.81292	36800000	37300000	31000000	31700000	20965	Uncharacterized protein OS=Aeromonas sp. CA23 OX=2033032 GN=CK910_09270 PE=4 SV=1						1.02	0.0285692	SP	FALSE	FALSE
881	1062	A0A291U560|A0A291U560	3.01	25	5	5	0.625	3.21697	24600000	20300000	23200000	19800000	29602	Structural protein MipA OS=Aeromonas sp. CA23 OX=2033032 GN=CK910_19570 PE=3 SV=1	K07274					0.85	-0.234465	SP	FALSE	FALSE
882	937	A0A291TZ74|A0A291TZ74	10.64	41	7	7	1.16667	13.678	43300000	32200000	36400000	26800000	21314	Lipopolysaccharide export system protein LptC OS=Aeromonas sp. CA23 OX=2033032 GN=lptC PE=3 SV=1	K11719					0.74	-0.434403	SP	FALSE	FALSE
883	945	A0A291U839|A0A291U839	0.51	29	6	6	0.75	4.62341	68400000	53700000	47200000	38800000	31743	NADPH-dependent 7-cyano-7-deazaguanine reductase OS=Aeromonas sp. CA23 OX=2033032 GN=queF PE=3 SV=1	K06879					0.82	-0.286304	NO_SP	FALSE	FALSE
[truncated: 629 more rows]

## Sheet: 2.A_bestiarum_pellet_selected
Protein Group	Protein ID	Accession	Significance (-10log(p))	Coverage (%)	#Peptides	#Unique	PAI	emPAI	Group 1 Area (top-3 peptides, Glucose)	Group 2 Area (top-3 peptides, Chitin)	Avg. Mass	Description	KO	CAZY/NOTES	ratio_chitin_to_glucose	LFC	SignalP	adj p-value <0.05 (BH)	adj p-value <0.1 (BH)
[truncated: 28 more rows]

[truncated: 7 more sheets: 3.A_bestiarum_SN, 4.A_bestiarum_SN_selected, 5.A_rivuli_pellet, 6.A_rivuli_pellet_selected, 7.A_rivuli_SN, 8.A_rivuli_SN_selected, 9.Table_Figure3]
